# Supplementary material
Source: publisher figshare collection journal article supplement (https://gsajournals.figshare.com/ndownloader/files/30688469)
Supplement: Supplementary file 1 [file 30688469]

## Sheet: Arabidopsis-Low
Dataset S01. Expressed genes in the plants (Arabidopsis and lettuce) and the bacteria (Escherichia coli O157:H7 and Salmonella enterica Typhimurium 14028s) from three different experiments. Significantly differentially expressed genes were considered genes with a Benjanimi–Hochberg false discovery rate adjusted p-value (adj.P.Value) <0.001 for plant genes and <0.05 for bacterial genes and with a …
Arabidopsis
O157:H7 4 hpi vs Mock 4 hpi								O157:H7 24 hpi vs Mock 24 hpi								STm 14028s 4 hpi vs Mock 4 hpi								STm 14028s 24 hpi vs Mock 24 hpi
ids	AveExp_O157:H7	AveExp_Mock	logFC	t	P.Value	adj.P.Val	Description	ids	AveExp_O157:H7	AveExp_Mock	logFC	t	P.Value	adj.P.Val	Description	ids	AveExp_STm 14028s	AveExp_Mock	logFC	t	P.Value	adj.P.Val	Description	ids	AveExp_STm 14028s	AveExp_Mock	logFC	t	P.Value	adj.P.Val	Description
AT1G01010	10.1737	7.62184	0.456604	1.27185	0.219349	0.328884	NAC domain containing protein 1;(source:Araport11) protein_coding NAC DOMAIN CONTAINING PROTEIN 1 (NAC001) NAC DOMAIN CONTAINING PROTEIN 1 (ANAC001); (NTL10);NAC DOMAIN CONTAINING PROTEIN 1 (NAC001)	AT1G01010	8.46307	3.02974	1.48865	2.79013	0.0119566	0.0480902	NAC domain containing protein 1;(source:Araport11) protein_coding NAC DOMAIN CONTAINING PROTEIN 1 (NAC001) NAC DOMAIN CONTAINING PROTEIN 1 (ANAC001); (NTL10);NAC DOMAIN CONTAINING PROTEIN 1 (NAC001)	AT1G01010	7.82839	7.62184	0.188763	0.493784	0.627331	0.765055	NAC domain containing protein 1;(source:Araport11) protein_coding NAC DOMAIN CONTAINING PROTEIN 1 (NAC001) NAC DOMAIN CONTAINING PROTEIN 1 (ANAC001); (NTL10);NAC DOMAIN CONTAINING PROTEIN 1 (NAC001)	AT1G01010	22.3829	3.02974	2.86829	5.69938	1.96828e-05	0.000164493	NAC domain containing protein 1;(source:Araport11) protein_coding NAC DOMAIN CONTAINING PROTEIN 1 (NAC001) NAC DOMAIN CONTAINING PROTEIN 1 (ANAC001); (NTL10);NAC DOMAIN CONTAINING PROTEIN 1 (NAC001)
AT1G01020	3.5095	2.40723	0.572765	1.28378	0.215231	0.323872	ARV1 family protein;(source:Araport11) protein_coding (ARV1) (ARV1)	AT1G01020	1.80368	2.43103	-0.594295	-1.0121	0.324681	0.494235	ARV1 family protein;(source:Araport11) protein_coding (ARV1) (ARV1)	AT1G01020	3.10719	2.40723	0.472539	1.01026	0.325537	0.507668	ARV1 family protein;(source:Araport11) protein_coding (ARV1) (ARV1)	AT1G01020	2.22879	2.43103	-0.136068	-0.25374	0.802524	0.864117	ARV1 family protein;(source:Araport11) protein_coding (ARV1) (ARV1)
AT1G01030	11.121	3.01661	1.83956	3.49656	0.00252432	0.00967665	AP2/B3-like transcriptional factor family protein;(source:Araport11) protein_coding NGATHA3 (NGA3) NGATHA3 (NGA3)	AT1G01030	1.79228	1.87948	-0.00521941	-0.00612725	0.995177	0.997102	AP2/B3-like transcriptional factor family protein;(source:Araport11) protein_coding NGATHA3 (NGA3) NGATHA3 (NGA3)	AT1G01030	5.29732	3.01661	0.927077	1.63287	0.119579	0.268017	AP2/B3-like transcriptional factor family protein;(source:Araport11) protein_coding NGATHA3 (NGA3) NGATHA3 (NGA3)	AT1G01030	1.2471	1.87948	-0.597417	-0.633052	0.534529	0.646092	AP2/B3-like transcriptional factor family protein;(source:Araport11) protein_coding NGATHA3 (NGA3) NGATHA3 (NGA3)
AT1G01040	38.9424	149.225	-1.94206	-12.3619	2.52403e-10	3.29299e-08	Encodes a Dicer homolog. Dicer is a RNA helicase involved in microRNA processing. Mutations in this locus can result in embryo lethality. Embryo shape at seed maturity is globular-elongate. Other mutants convert the floral meristems to an indeterminate state, others yet show defects in ovule development. mRNA is expressed in all shoot tissues. DCL1 is able to produce miRNAs and siRNAs. The mRNA i…	AT1G01040	94.5755	76.0342	0.314968	2.00836	0.0595922	0.152073	Encodes a Dicer homolog. Dicer is a RNA helicase involved in microRNA processing. Mutations in this locus can result in embryo lethality. Embryo shape at seed maturity is globular-elongate. Other mutants convert the floral meristems to an indeterminate state, others yet show defects in ovule development. mRNA is expressed in all shoot tissues. DCL1 is able to produce miRNAs and siRNAs. The mRNA i…	AT1G01040	61.5511	149.225	-1.26884	-8.12998	1.72498e-07	1.19144e-05	Encodes a Dicer homolog. Dicer is a RNA helicase involved in microRNA processing. Mutations in this locus can result in embryo lethality. Embryo shape at seed maturity is globular-elongate. Other mutants convert the floral meristems to an indeterminate state, others yet show defects in ovule development. mRNA is expressed in all shoot tissues. DCL1 is able to produce miRNAs and siRNAs. The mRNA i…	AT1G01040	120.653	76.0342	0.661929	4.22377	0.000494062	0.00221714	Encodes a Dicer homolog. Dicer is a RNA helicase involved in microRNA processing. Mutations in this locus can result in embryo lethality. Embryo shape at seed maturity is globular-elongate. Other mutants convert the floral meristems to an indeterminate state, others yet show defects in ovule development. mRNA is expressed in all shoot tissues. DCL1 is able to produce miRNAs and siRNAs. The mRNA i…
AT1G01050	22.7029	17.7042	0.401974	2.08945	0.0508883	0.105512	Encodes a soluble protein with inorganic pyrophosphatase activity that is highly specific for Mg-inorganic pyrophosphate. protein_coding PYROPHOSPHORYLASE 1 (PPa1) PYROPHOSPHORYLASE 1 (PPa1);PYROPHOSPHORYLASE 1 (AtPPa1)	AT1G01050	12.4636	23.4999	-0.880847	-4.13573	0.000601807	0.00536091	Encodes a soluble protein with inorganic pyrophosphatase activity that is highly specific for Mg-inorganic pyrophosphate. protein_coding PYROPHOSPHORYLASE 1 (PPa1) PYROPHOSPHORYLASE 1 (PPa1);PYROPHOSPHORYLASE 1 (AtPPa1)	AT1G01050	20.3806	17.7042	0.248946	1.2528	0.226047	0.403299	Encodes a soluble protein with inorganic pyrophosphatase activity that is highly specific for Mg-inorganic pyrophosphate. protein_coding PYROPHOSPHORYLASE 1 (PPa1) PYROPHOSPHORYLASE 1 (PPa1);PYROPHOSPHORYLASE 1 (AtPPa1)	AT1G01050	19.8529	23.4999	-0.231173	-1.17053	0.256803	0.369642	Encodes a soluble protein with inorganic pyrophosphatase activity that is highly specific for Mg-inorganic pyrophosphate. protein_coding PYROPHOSPHORYLASE 1 (PPa1) PYROPHOSPHORYLASE 1 (PPa1);PYROPHOSPHORYLASE 1 (AtPPa1)
AT1G01060	1.57922	2.96625	-0.886954	-1.82963	0.083641	0.154863	LHY encodes a myb-related putative transcription factor involved in circadian rhythm along with another myb transcription factor CCA1 protein_coding LATE ELONGATED HYPOCOTYL (LHY) LATE ELONGATED HYPOCOTYL 1 (LHY1);LATE ELONGATED HYPOCOTYL (LHY)	AT1G01060	25.0865	0.850522	4.97361	7.55416	4.93264e-07	3.40697e-05	LHY encodes a myb-related putative transcription factor involved in circadian rhythm along with another myb transcription factor CCA1 protein_coding LATE ELONGATED HYPOCOTYL (LHY) LATE ELONGATED HYPOCOTYL 1 (LHY1);LATE ELONGATED HYPOCOTYL (LHY)	AT1G01060	3.04872	2.96625	0.135951	0.312783	0.757981	0.85645	LHY encodes a myb-related putative transcription factor involved in circadian rhythm along with another myb transcription factor CCA1 protein_coding LATE ELONGATED HYPOCOTYL (LHY) LATE ELONGATED HYPOCOTYL 1 (LHY1);LATE ELONGATED HYPOCOTYL (LHY)	AT1G01060	1.80069	0.850522	1.18714	1.54295	0.139953	0.227882	LHY encodes a myb-related putative transcription factor involved in circadian rhythm along with another myb transcription factor CCA1 protein_coding LATE ELONGATED HYPOCOTYL (LHY) LATE ELONGATED HYPOCOTYL 1 (LHY1);LATE ELONGATED HYPOCOTYL (LHY)
AT1G01070	7.44853	18.1701	-1.32495	-4.78024	0.000143304	0.000960493	Encodes a plasma membrane-localized amino acid transporter likely involved in amino acid export in the developing seed. protein_coding USUALLY MULTIPLE ACIDS MOVE IN AND OUT TRANSPORTERS 28 (UMAMIT28) USUALLY MULTIPLE ACIDS MOVE IN AND OUT TRANSPORTERS 28 (UMAMIT28)	AT1G01070	9.77631	2.81583	1.76558	3.5133	0.00243158	0.0149925	Encodes a plasma membrane-localized amino acid transporter likely involved in amino acid export in the developing seed. protein_coding USUALLY MULTIPLE ACIDS MOVE IN AND OUT TRANSPORTERS 28 (UMAMIT28) USUALLY MULTIPLE ACIDS MOVE IN AND OUT TRANSPORTERS 28 (UMAMIT28)	AT1G01070	15.2074	18.1701	-0.293962	-1.15566	0.262681	0.443117	Encodes a plasma membrane-localized amino acid transporter likely involved in amino acid export in the developing seed. protein_coding USUALLY MULTIPLE ACIDS MOVE IN AND OUT TRANSPORTERS 28 (UMAMIT28) USUALLY MULTIPLE ACIDS MOVE IN AND OUT TRANSPORTERS 28 (UMAMIT28)	AT1G01070	4.44518	2.81583	0.619526	1.12041	0.277024	0.391813	Encodes a plasma membrane-localized amino acid transporter likely involved in amino acid export in the developing seed. protein_coding USUALLY MULTIPLE ACIDS MOVE IN AND OUT TRANSPORTERS 28 (UMAMIT28) USUALLY MULTIPLE ACIDS MOVE IN AND OUT TRANSPORTERS 28 (UMAMIT28)
AT1G01080	19.9641	16.7776	0.301938	1.41449	0.174004	0.274384	RNA-binding (RRM/RBD/RNP motifs) family protein;(source:Araport11) protein_coding	AT1G01080	15.2561	43.6036	-1.49356	-7.15009	1.0587e-06	5.57135e-05	RNA-binding (RRM/RBD/RNP motifs) family protein;(source:Araport11) protein_coding	AT1G01080	21.9866	16.7776	0.427451	1.97491	0.0635577	0.175468	RNA-binding (RRM/RBD/RNP motifs) family protein;(source:Araport11) protein_coding	AT1G01080	8.6815	43.6036	-2.36683	-9.63817	1.34385e-08	7.79228e-07	RNA-binding (RRM/RBD/RNP motifs) family protein;(source:Araport11) protein_coding
AT1G01090	108.93	101.065	0.100517	0.623269	0.540797	0.648659	pyruvate dehydrogenase E1 alpha subunit protein_coding PYRUVATE DEHYDROGENASE E1 ALPHA (PDH-E1 ALPHA) PYRUVATE DEHYDROGENASE E1 ALPHA (PDH-E1 ALPHA)	AT1G01090	119.969	146.334	-0.273599	-1.70381	0.105333	0.226188	pyruvate dehydrogenase E1 alpha subunit protein_coding PYRUVATE DEHYDROGENASE E1 ALPHA (PDH-E1 ALPHA) PYRUVATE DEHYDROGENASE E1 ALPHA (PDH-E1 ALPHA)	AT1G01090	87.567	101.065	-0.197577	-1.23193	0.233565	0.411921	pyruvate dehydrogenase E1 alpha subunit protein_coding PYRUVATE DEHYDROGENASE E1 ALPHA (PDH-E1 ALPHA) PYRUVATE DEHYDROGENASE E1 ALPHA (PDH-E1 ALPHA)	AT1G01090	61.1271	146.334	-1.25194	-7.71411	3.66791e-07	7.99409e-06	pyruvate dehydrogenase E1 alpha subunit protein_coding PYRUVATE DEHYDROGENASE E1 ALPHA (PDH-E1 ALPHA) PYRUVATE DEHYDROGENASE E1 ALPHA (PDH-E1 ALPHA)
AT1G01100	24.751	30.2543	-0.289227	-1.43791	0.167336	0.266126	Co-orthologous gene of large ribosomal subunit protein RPP1. protein_coding 60S ACIDIC RIBOSOMAL PROTEIN P1-1 (RPP1A) RPP1 CO-ORTHOLOGOUS GENE 1 (RPP1.1);60S ACIDIC RIBOSOMAL PROTEIN P1-1 (RPP1A)	AT1G01100	67.0993	57.7651	0.237186	1.2795	0.216702	0.374534	Co-orthologous gene of large ribosomal subunit protein RPP1. protein_coding 60S ACIDIC RIBOSOMAL PROTEIN P1-1 (RPP1A) RPP1 CO-ORTHOLOGOUS GENE 1 (RPP1.1);60S ACIDIC RIBOSOMAL PROTEIN P1-1 (RPP1A)	AT1G01100	15.3379	30.2543	-1.04224	-4.73416	0.000158644	0.00237864	Co-orthologous gene of large ribosomal subunit protein RPP1. protein_coding 60S ACIDIC RIBOSOMAL PROTEIN P1-1 (RPP1A) RPP1 CO-ORTHOLOGOUS GENE 1 (RPP1.1);60S ACIDIC RIBOSOMAL PROTEIN P1-1 (RPP1A)	AT1G01100	67.7869	57.7651	0.22283	1.20127	0.244959	0.355893	Co-orthologous gene of large ribosomal subunit protein RPP1. protein_coding 60S ACIDIC RIBOSOMAL PROTEIN P1-1 (RPP1A) RPP1 CO-ORTHOLOGOUS GENE 1 (RPP1.1);60S ACIDIC RIBOSOMAL PROTEIN P1-1 (RPP1A)
AT1G01110	1.2688	2.92697	-1.77552	-2.28032	0.0347751	0.0776467	Member of IQ67 (CaM binding) domain containing family. protein_coding IQ-DOMAIN 18 (IQD18) IQ-DOMAIN 18 (IQD18)	AT1G01110	1.6411	2.21995	-0.444565	-0.610447	0.54907	0.694966	Member of IQ67 (CaM binding) domain containing family. protein_coding IQ-DOMAIN 18 (IQD18) IQ-DOMAIN 18 (IQD18)	AT1G01110	2.27206	2.92697	-0.21088	-0.346385	0.733003	0.839128	Member of IQ67 (CaM binding) domain containing family. protein_coding IQ-DOMAIN 18 (IQD18) IQ-DOMAIN 18 (IQD18)	AT1G01110	0.692661	2.21995	-1.75503	-1.85663	0.0795329	0.145081	Member of IQ67 (CaM binding) domain containing family. protein_coding IQ-DOMAIN 18 (IQD18) IQ-DOMAIN 18 (IQD18)
AT1G01120	64.3621	134.484	-1.03121	-3.03567	0.00701253	0.0218917	Encodes a condensing enzyme KCS1 (3-ketoacyl-CoA synthase 1) which is involved in the critical fatty acid elongation process in wax biosynthesis. protein_coding 3-KETOACYL-COA SYNTHASE 1 (KCS1) 3-KETOACYL-COA SYNTHASE 1 (KCS1)	AT1G01120	42.5051	93.6127	-1.11476	-3.15496	0.00539413	0.0268662	Encodes a condensing enzyme KCS1 (3-ketoacyl-CoA synthase 1) which is involved in the critical fatty acid elongation process in wax biosynthesis. protein_coding 3-KETOACYL-COA SYNTHASE 1 (KCS1) 3-KETOACYL-COA SYNTHASE 1 (KCS1)	AT1G01120	102.638	134.484	-0.36117	-1.06171	0.302177	0.483752	Encodes a condensing enzyme KCS1 (3-ketoacyl-CoA synthase 1) which is involved in the critical fatty acid elongation process in wax biosynthesis. protein_coding 3-KETOACYL-COA SYNTHASE 1 (KCS1) 3-KETOACYL-COA SYNTHASE 1 (KCS1)	AT1G01120	5.97705	93.6127	-3.97422	-7.26066	8.57144e-07	1.48965e-05	Encodes a condensing enzyme KCS1 (3-ketoacyl-CoA synthase 1) which is involved in the critical fatty acid elongation process in wax biosynthesis. protein_coding 3-KETOACYL-COA SYNTHASE 1 (KCS1) 3-KETOACYL-COA SYNTHASE 1 (KCS1)
AT1G01130	0.660174	0.813719	1.39057	0.978739	0.340468	0.461232	CBL-interacting Serine/Threonine-kinase;(source:Araport11) protein_coding	AT1G01130	0.490755	0.625593	0.0596747	0.0372005	0.970728	0.981754	CBL-interacting Serine/Threonine-kinase;(source:Araport11) protein_coding	AT1G01130	0.543769	0.813719	1.08911	0.720243	0.480472	0.651366	CBL-interacting Serine/Threonine-kinase;(source:Araport11) protein_coding	AT1G01130	0.251059	0.625593	-0.671671	-0.382857	0.706235	0.789341	CBL-interacting Serine/Threonine-kinase;(source:Araport11) protein_coding
AT1G01140	109.367	198.901	-0.860295	-5.49481	3.03755e-05	0.000275507	Encodes a CBL-interacting protein kinase with similarity to SOS2 protein_coding CBL-INTERACTING PROTEIN KINASE 9 (CIPK9) PROTEIN KINASE 6 (PKS6);CBL-INTERACTING PROTEIN KINASE 9 (CIPK9)	AT1G01140	150.04	53.247	1.48961	9.30513	2.30574e-08	4.24686e-06	Encodes a CBL-interacting protein kinase with similarity to SOS2 protein_coding CBL-INTERACTING PROTEIN KINASE 9 (CIPK9) PROTEIN KINASE 6 (PKS6);CBL-INTERACTING PROTEIN KINASE 9 (CIPK9)	AT1G01140	181.868	198.901	-0.135552	-0.858793	0.401561	0.581033	Encodes a CBL-interacting protein kinase with similarity to SOS2 protein_coding CBL-INTERACTING PROTEIN KINASE 9 (CIPK9) PROTEIN KINASE 6 (PKS6);CBL-INTERACTING PROTEIN KINASE 9 (CIPK9)	AT1G01140	89.532	53.247	0.748475	4.69419	0.000173298	0.000938256	Encodes a CBL-interacting protein kinase with similarity to SOS2 protein_coding CBL-INTERACTING PROTEIN KINASE 9 (CIPK9) PROTEIN KINASE 6 (PKS6);CBL-INTERACTING PROTEIN KINASE 9 (CIPK9)
AT1G01160	49.7224	33.2169	0.547347	2.99977	0.007586	0.0233025	Arabidopsis thaliana GRF1-interacting factor 2 (GIF2) mRNA protein_coding GRF1-INTERACTING FACTOR 2 (GIF2) GRF1-INTERACTING FACTOR 2 (GIF2)	AT1G01160	26.2008	24.6665	0.108578	0.525824	0.605323	0.73941	Arabidopsis thaliana GRF1-interacting factor 2 (GIF2) mRNA protein_coding GRF1-INTERACTING FACTOR 2 (GIF2) GRF1-INTERACTING FACTOR 2 (GIF2)	AT1G01160	54.8298	33.2169	0.726897	3.96523	0.000882307	0.00857522	Arabidopsis thaliana GRF1-interacting factor 2 (GIF2) mRNA protein_coding GRF1-INTERACTING FACTOR 2 (GIF2) GRF1-INTERACTING FACTOR 2 (GIF2)	AT1G01160	32.3617	24.6665	0.399639	1.97043	0.0641055	0.122034	Arabidopsis thaliana GRF1-interacting factor 2 (GIF2) mRNA protein_coding GRF1-INTERACTING FACTOR 2 (GIF2) GRF1-INTERACTING FACTOR 2 (GIF2)
AT1G01170	33.6673	23.6584	0.513523	2.25997	0.0362363	0.0802512	ozone-responsive stress-like protein (DUF1138);(source:Araport11) protein_coding	AT1G01170	17.8408	24.3617	-0.457415	-1.79486	0.0892072	0.20141	ozone-responsive stress-like protein (DUF1138);(source:Araport11) protein_coding	AT1G01170	38.3655	23.6584	0.705976	3.08625	0.0062755	0.0355976	ozone-responsive stress-like protein (DUF1138);(source:Araport11) protein_coding	AT1G01170	9.99329	24.3617	-1.36964	-4.7034	0.000169802	0.000923054	ozone-responsive stress-like protein (DUF1138);(source:Araport11) protein_coding
AT1G01180	21.9796	28.9029	-0.571779	-1.90815	0.0721824	0.138405	S-adenosyl-L-methionine-dependent methyltransferases superfamily protein;(source:Araport11) protein_coding	AT1G01180	14.2453	11.7941	0.309115	0.783645	0.443271	0.607597	S-adenosyl-L-methionine-dependent methyltransferases superfamily protein;(source:Araport11) protein_coding	AT1G01180	54.968	28.9029	0.933628	3.2762	0.00412457	0.0262426	S-adenosyl-L-methionine-dependent methyltransferases superfamily protein;(source:Araport11) protein_coding	AT1G01180	17.8623	11.7941	0.639409	1.66352	0.113234	0.192798	S-adenosyl-L-methionine-dependent methyltransferases superfamily protein;(source:Araport11) protein_coding
AT1G01210	4.35075	3.00823	0.504313	1.3393	0.196867	0.302119	DNA-directed RNA polymerase, subunit M, archaeal;(source:Araport11) protein_coding	AT1G01210	3.34615	2.48199	0.56834	1.2065	0.242987	0.404092	DNA-directed RNA polymerase, subunit M, archaeal;(source:Araport11) protein_coding	AT1G01210	3.64295	3.00823	0.275396	0.688646	0.499682	0.666301	DNA-directed RNA polymerase, subunit M, archaeal;(source:Araport11) protein_coding	AT1G01210	3.35557	2.48199	0.578746	1.2256	0.235884	0.345674	DNA-directed RNA polymerase, subunit M, archaeal;(source:Araport11) protein_coding
AT1G01220	24.0375	39.424	-0.708145	-3.31139	0.00381443	0.0134509	Encodes a bifunctional enzyme that has both L-fucokinase and GDP-L-fucose pyrophosphorylase activities. It catalyzes the two steps of the L-fucose salvage pathway for the generation of activated GDP-L-fucose. This pathway seems to be of minor importance for cell wall polysaccharide biosynthesis compared to the de novo GDP-L-fucose biosynthesis pathway in Arabidopsis. protein_coding L-FUCOKINASE/G…	AT1G01220	26.2987	41.6806	-0.699509	-3.13721	0.00560947	0.0276456	Encodes a bifunctional enzyme that has both L-fucokinase and GDP-L-fucose pyrophosphorylase activities. It catalyzes the two steps of the L-fucose salvage pathway for the generation of activated GDP-L-fucose. This pathway seems to be of minor importance for cell wall polysaccharide biosynthesis compared to the de novo GDP-L-fucose biosynthesis pathway in Arabidopsis. protein_coding L-FUCOKINASE/G…	AT1G01220	25.5194	39.424	-0.60897	-2.79513	0.0118286	0.0554809	Encodes a bifunctional enzyme that has both L-fucokinase and GDP-L-fucose pyrophosphorylase activities. It catalyzes the two steps of the L-fucose salvage pathway for the generation of activated GDP-L-fucose. This pathway seems to be of minor importance for cell wall polysaccharide biosynthesis compared to the de novo GDP-L-fucose biosynthesis pathway in Arabidopsis. protein_coding L-FUCOKINASE/G…	AT1G01220	21.2928	41.6806	-0.95673	-4.16277	0.000566405	0.00247639	Encodes a bifunctional enzyme that has both L-fucokinase and GDP-L-fucose pyrophosphorylase activities. It catalyzes the two steps of the L-fucose salvage pathway for the generation of activated GDP-L-fucose. This pathway seems to be of minor importance for cell wall polysaccharide biosynthesis compared to the de novo GDP-L-fucose biosynthesis pathway in Arabidopsis. protein_coding L-FUCOKINASE/G…
AT1G01225	3.28258	1.12819	2.17836	2.17005	0.043395	0.0925907	NC domain-containing protein-like protein;(source:Araport11) protein_coding	AT1G01225	0.461134	1.6724	-1.76746	-1.47037	0.158443	0.30174	NC domain-containing protein-like protein;(source:Araport11) protein_coding	AT1G01225	2.15299	1.12819	1.2024	1.10671	0.282751	0.464705	NC domain-containing protein-like protein;(source:Araport11) protein_coding	AT1G01225	0.834202	1.6724	-0.893471	-0.860066	0.400877	0.519143	NC domain-containing protein-like protein;(source:Araport11) protein_coding
AT1G01230	16.1491	9.56299	0.774726	3.67055	0.00170971	0.00708278	ORM1 is an ER localized orosomucoid-like protein involved in sphingolipid homeostasis. protein_coding (ATORM1) OROSOMUCOID-LIKE 1 (ORM1); (ATORM1)	AT1G01230	12.681	16.8101	-0.342252	-1.6566	0.114642	0.2403	ORM1 is an ER localized orosomucoid-like protein involved in sphingolipid homeostasis. protein_coding (ATORM1) OROSOMUCOID-LIKE 1 (ORM1); (ATORM1)	AT1G01230	23.1633	9.56299	1.28	6.11439	8.29242e-06	0.000249264	ORM1 is an ER localized orosomucoid-like protein involved in sphingolipid homeostasis. protein_coding (ATORM1) OROSOMUCOID-LIKE 1 (ORM1); (ATORM1)	AT1G01230	19.5022	16.8101	0.261057	1.34591	0.194765	0.296279	ORM1 is an ER localized orosomucoid-like protein involved in sphingolipid homeostasis. protein_coding (ATORM1) OROSOMUCOID-LIKE 1 (ORM1); (ATORM1)
AT1G01240	141.988	211.077	-0.617598	-2.73642	0.0134181	0.0365554	transmembrane protein;(source:Araport11) protein_coding	AT1G01240	92.5037	48.1568	0.945793	4.10831	0.000639973	0.0056026	transmembrane protein;(source:Araport11) protein_coding	AT1G01240	117.259	211.077	-0.848555	-3.79702	0.00128727	0.0112638	transmembrane protein;(source:Araport11) protein_coding	AT1G01240	40.0286	48.1568	-0.262543	-1.0995	0.285803	0.401478	transmembrane protein;(source:Araport11) protein_coding
AT1G01250	0.667521	2.67632	-2.18434	-2.99632	0.00764349	0.0234358	encodes a member of the DREB subfamily A-4 of ERF/AP2 transcription factor family. The protein contains one AP2 domain. There are 17 members in this subfamily including TINY. protein_coding	AT1G01250	1.70355	3.58218	-1.21711	-2.14701	0.0454269	0.1251	encodes a member of the DREB subfamily A-4 of ERF/AP2 transcription factor family. The protein contains one AP2 domain. There are 17 members in this subfamily including TINY. protein_coding	AT1G01250	1.50754	2.67632	-1.18761	-1.93782	0.0682287	0.184274	encodes a member of the DREB subfamily A-4 of ERF/AP2 transcription factor family. The protein contains one AP2 domain. There are 17 members in this subfamily including TINY. protein_coding	AT1G01250	1.9208	3.58218	-0.978542	-1.73509	0.0995307	0.173926	encodes a member of the DREB subfamily A-4 of ERF/AP2 transcription factor family. The protein contains one AP2 domain. There are 17 members in this subfamily including TINY. protein_coding
AT1G01260	21.622	18.4632	0.242299	1.29778	0.21048	0.318279	bHLH13 interacts with JAZ proteins, and functions redundantly with bHLH3, bHLH14 and bHLH17 to negatively regulate jasmonate responses. protein_coding JASMONATE ASSOCIATED MYC2 LIKE 2 (JAM2) JASMONATE ASSOCIATED MYC2 LIKE 2 (JAM2); (BHLH013); (BHLH13)	AT1G01260	22.15	20.262	0.136595	0.699927	0.492773	0.648982	bHLH13 interacts with JAZ proteins, and functions redundantly with bHLH3, bHLH14 and bHLH17 to negatively regulate jasmonate responses. protein_coding JASMONATE ASSOCIATED MYC2 LIKE 2 (JAM2) JASMONATE ASSOCIATED MYC2 LIKE 2 (JAM2); (BHLH013); (BHLH13)	AT1G01260	22.0242	18.4632	0.270463	1.41792	0.173013	0.339715	bHLH13 interacts with JAZ proteins, and functions redundantly with bHLH3, bHLH14 and bHLH17 to negatively regulate jasmonate responses. protein_coding JASMONATE ASSOCIATED MYC2 LIKE 2 (JAM2) JASMONATE ASSOCIATED MYC2 LIKE 2 (JAM2); (BHLH013); (BHLH13)	AT1G01260	19.5113	20.262	-0.0629206	-0.31545	0.755988	0.829309	bHLH13 interacts with JAZ proteins, and functions redundantly with bHLH3, bHLH14 and bHLH17 to negatively regulate jasmonate responses. protein_coding JASMONATE ASSOCIATED MYC2 LIKE 2 (JAM2) JASMONATE ASSOCIATED MYC2 LIKE 2 (JAM2); (BHLH013); (BHLH13)
AT1G01290	12.8508	13.9777	-0.127427	-0.65271	0.522057	0.63309	COFACTOR OF NITRATE REDUCTASE AND XANTHINE DEHYDROGENASE 3. Encodes a protein involved in molybdenum cofactor biosynthesis. Homologous to E.coli MoaC. Expression is low in all tissues examined, except in roots. Appears to have targeting signals for chloroplast or mitochondria protein_coding COFACTOR OF NITRATE REDUCTASE AND XANTHINE DEHYDROGENASE 3 (CNX3) COFACTOR OF NITRATE REDUCTASE AND XANTHIN…	AT1G01290	22.5623	12.5653	0.824034	4.07735	0.000685997	0.00589023	COFACTOR OF NITRATE REDUCTASE AND XANTHINE DEHYDROGENASE 3. Encodes a protein involved in molybdenum cofactor biosynthesis. Homologous to E.coli MoaC. Expression is low in all tissues examined, except in roots. Appears to have targeting signals for chloroplast or mitochondria protein_coding COFACTOR OF NITRATE REDUCTASE AND XANTHINE DEHYDROGENASE 3 (CNX3) COFACTOR OF NITRATE REDUCTASE AND XANTHIN…	AT1G01290	10.6561	13.9777	-0.401994	-1.92695	0.0696538	0.186781	COFACTOR OF NITRATE REDUCTASE AND XANTHINE DEHYDROGENASE 3. Encodes a protein involved in molybdenum cofactor biosynthesis. Homologous to E.coli MoaC. Expression is low in all tissues examined, except in roots. Appears to have targeting signals for chloroplast or mitochondria protein_coding COFACTOR OF NITRATE REDUCTASE AND XANTHINE DEHYDROGENASE 3 (CNX3) COFACTOR OF NITRATE REDUCTASE AND XANTHIN…	AT1G01290	13.8782	12.5653	0.148039	0.687039	0.500671	0.615112	COFACTOR OF NITRATE REDUCTASE AND XANTHINE DEHYDROGENASE 3. Encodes a protein involved in molybdenum cofactor biosynthesis. Homologous to E.coli MoaC. Expression is low in all tissues examined, except in roots. Appears to have targeting signals for chloroplast or mitochondria protein_coding COFACTOR OF NITRATE REDUCTASE AND XANTHINE DEHYDROGENASE 3 (CNX3) COFACTOR OF NITRATE REDUCTASE AND XANTHIN…
AT1G01300	52.9238	14.6221	1.61068	4.15008	0.000582747	0.00300854	Eukaryotic aspartyl protease family protein;(source:Araport11) protein_coding	AT1G01300	43.9333	55.5717	-0.343455	-1.04172	0.311107	0.48034	Eukaryotic aspartyl protease family protein;(source:Araport11) protein_coding	AT1G01300	34.4462	14.6221	1.23501	3.1198	0.00582894	0.0336638	Eukaryotic aspartyl protease family protein;(source:Araport11) protein_coding	AT1G01300	42.4637	55.5717	-0.391991	-1.18455	0.251347	0.363207	Eukaryotic aspartyl protease family protein;(source:Araport11) protein_coding
AT1G01320	585.503	962.793	-0.724123	-3.91462	0.000988485	0.00457914	Encodes REDUCED CHLOROPLAST COVERAGE 1 (REC1) a protein with similarity to the FLOURY locus in maize. Located in the nucleus and cytosol. Contributes to establishing the size of the chloroplast compartment. protein_coding REDUCED CHLOROPLAST COVERAGE (REC1) FLOURY ENDOSPERM LIKE 2 (FLL2);REDUCED CHLOROPLAST COVERAGE (REC1)	AT1G01320	538.51	1081.34	-1.01917	-5.61128	2.37123e-05	0.000510323	Encodes REDUCED CHLOROPLAST COVERAGE 1 (REC1) a protein with similarity to the FLOURY locus in maize. Located in the nucleus and cytosol. Contributes to establishing the size of the chloroplast compartment. protein_coding REDUCED CHLOROPLAST COVERAGE (REC1) FLOURY ENDOSPERM LIKE 2 (FLL2);REDUCED CHLOROPLAST COVERAGE (REC1)	AT1G01320	924.156	962.793	-0.0658779	-0.353251	0.727936	0.835925	Encodes REDUCED CHLOROPLAST COVERAGE 1 (REC1) a protein with similarity to the FLOURY locus in maize. Located in the nucleus and cytosol. Contributes to establishing the size of the chloroplast compartment. protein_coding REDUCED CHLOROPLAST COVERAGE (REC1) FLOURY ENDOSPERM LIKE 2 (FLL2);REDUCED CHLOROPLAST COVERAGE (REC1)	AT1G01320	551.856	1081.34	-0.983064	-5.4138	3.61186e-05	0.00027045	Encodes REDUCED CHLOROPLAST COVERAGE 1 (REC1) a protein with similarity to the FLOURY locus in maize. Located in the nucleus and cytosol. Contributes to establishing the size of the chloroplast compartment. protein_coding REDUCED CHLOROPLAST COVERAGE (REC1) FLOURY ENDOSPERM LIKE 2 (FLL2);REDUCED CHLOROPLAST COVERAGE (REC1)
AT1G01340	7.03046	9.2052	-0.327809	-0.743107	0.466848	0.583971	member of Cyclic nucleotide gated channel family protein_coding CYCLIC NUCLEOTIDE GATED CHANNEL 10 (CNGC10) CYCLIC NUCLEOTIDE GATED CHANNEL 10 (CNGC10)	AT1G01340	9.00023	3.98201	0.952375	1.63576	0.118967	0.246475	member of Cyclic nucleotide gated channel family protein_coding CYCLIC NUCLEOTIDE GATED CHANNEL 10 (CNGC10) CYCLIC NUCLEOTIDE GATED CHANNEL 10 (CNGC10)	AT1G01340	8.616	9.2052	0.0978198	0.224528	0.824834	0.898734	member of Cyclic nucleotide gated channel family protein_coding CYCLIC NUCLEOTIDE GATED CHANNEL 10 (CNGC10) CYCLIC NUCLEOTIDE GATED CHANNEL 10 (CNGC10)	AT1G01340	51.8387	3.98201	3.67997	6.98499	1.45566e-06	2.18605e-05	member of Cyclic nucleotide gated channel family protein_coding CYCLIC NUCLEOTIDE GATED CHANNEL 10 (CNGC10) CYCLIC NUCLEOTIDE GATED CHANNEL 10 (CNGC10)
AT1G01350	14.1168	12.8063	0.155253	0.834864	0.414558	0.535168	Zinc finger (CCCH-type/C3HC4-type RING finger) family protein;(source:Araport11) protein_coding	AT1G01350	12.1452	12.0034	0.0384632	0.184718	0.855481	0.913956	Zinc finger (CCCH-type/C3HC4-type RING finger) family protein;(source:Araport11) protein_coding	AT1G01350	12.4607	12.8063	-0.0235057	-0.120676	0.905263	0.948162	Zinc finger (CCCH-type/C3HC4-type RING finger) family protein;(source:Araport11) protein_coding	AT1G01350	14.9068	12.0034	0.319644	1.57663	0.132006	0.217352	Zinc finger (CCCH-type/C3HC4-type RING finger) family protein;(source:Araport11) protein_coding
AT1G01360	12.1666	7.91866	0.624646	2.39909	0.0272805	0.0638732	Encodes RCAR1 (regulatory components of ABA receptor). Interacts with and regulates the type 2C protein phosphatases (PP2Cs) ABI1 and ABI2. Functions as abscisic acid sensor. The mRNA is cell-to-cell mobile. protein_coding REGULATORY COMPONENT OF ABA RECEPTOR 1 (RCAR1) PYRABACTIN RESISTANCE 1-LIKE 9 (PYL9);REGULATORY COMPONENT OF ABA RECEPTOR 1 (RCAR1)	AT1G01360	7.94791	6.54729	0.247627	0.784049	0.443039	0.607457	Encodes RCAR1 (regulatory components of ABA receptor). Interacts with and regulates the type 2C protein phosphatases (PP2Cs) ABI1 and ABI2. Functions as abscisic acid sensor. The mRNA is cell-to-cell mobile. protein_coding REGULATORY COMPONENT OF ABA RECEPTOR 1 (RCAR1) PYRABACTIN RESISTANCE 1-LIKE 9 (PYL9);REGULATORY COMPONENT OF ABA RECEPTOR 1 (RCAR1)	AT1G01360	7.68266	7.91866	0.00469938	0.0164398	0.987061	0.992822	Encodes RCAR1 (regulatory components of ABA receptor). Interacts with and regulates the type 2C protein phosphatases (PP2Cs) ABI1 and ABI2. Functions as abscisic acid sensor. The mRNA is cell-to-cell mobile. protein_coding REGULATORY COMPONENT OF ABA RECEPTOR 1 (RCAR1) PYRABACTIN RESISTANCE 1-LIKE 9 (PYL9);REGULATORY COMPONENT OF ABA RECEPTOR 1 (RCAR1)	AT1G01360	6.12731	6.54729	-0.0898524	-0.269443	0.790602	0.855393	Encodes RCAR1 (regulatory components of ABA receptor). Interacts with and regulates the type 2C protein phosphatases (PP2Cs) ABI1 and ABI2. Functions as abscisic acid sensor. The mRNA is cell-to-cell mobile. protein_coding REGULATORY COMPONENT OF ABA RECEPTOR 1 (RCAR1) PYRABACTIN RESISTANCE 1-LIKE 9 (PYL9);REGULATORY COMPONENT OF ABA RECEPTOR 1 (RCAR1)
AT1G01370	0.646173	0.233008	2.58427	2.04926	0.0550475	0.112021	Encodes a centromere-identifying protein histone H3 variant. Localized at centromeres in both mitotic and meiotic cells. Aurora3 phosphorylates CENH3 at S65; this post-translational modification is required for the proper development of the floral meristem. protein_coding (HTR12) CENTROMERIC HISTONE H3 (CENH3); (HTR12)	AT1G01370	0.563098	0.957093	-1.18748	-1.32098	0.202785	0.357921	Encodes a centromere-identifying protein histone H3 variant. Localized at centromeres in both mitotic and meiotic cells. Aurora3 phosphorylates CENH3 at S65; this post-translational modification is required for the proper development of the floral meristem. protein_coding (HTR12) CENTROMERIC HISTONE H3 (CENH3); (HTR12)	AT1G01370	0.264292	0.233008	1.47589	1.06795	0.299426	0.480913	Encodes a centromere-identifying protein histone H3 variant. Localized at centromeres in both mitotic and meiotic cells. Aurora3 phosphorylates CENH3 at S65; this post-translational modification is required for the proper development of the floral meristem. protein_coding (HTR12) CENTROMERIC HISTONE H3 (CENH3); (HTR12)	AT1G01370	2.31952	0.957093	1.30441	1.94407	0.0674207	0.127172	Encodes a centromere-identifying protein histone H3 variant. Localized at centromeres in both mitotic and meiotic cells. Aurora3 phosphorylates CENH3 at S65; this post-translational modification is required for the proper development of the floral meristem. protein_coding (HTR12) CENTROMERIC HISTONE H3 (CENH3); (HTR12)
AT1G01380	0.781934	0.316863	3.57103	2.01617	0.0586992	0.117768	ETC1 is involved in trichome and root hair patterning in Arabidopsis. protein_coding ENHANCER OF TRY AND CPC 1 (ETC1) ENHANCER OF TRY AND CPC 1 (ETC1)	AT1G01380	0.351817	0.159446	-0.00714631	-0.00365668	0.997122	0.998238	ETC1 is involved in trichome and root hair patterning in Arabidopsis. protein_coding ENHANCER OF TRY AND CPC 1 (ETC1) ENHANCER OF TRY AND CPC 1 (ETC1)	AT1G01380	0.209408	0.316863	-0.171692	-0.0755583	0.94059	0.968225	ETC1 is involved in trichome and root hair patterning in Arabidopsis. protein_coding ENHANCER OF TRY AND CPC 1 (ETC1) ENHANCER OF TRY AND CPC 1 (ETC1)	AT1G01380	0.0820462	0.159446	-0.994937	-0.453734	0.655354	0.750465	ETC1 is involved in trichome and root hair patterning in Arabidopsis. protein_coding ENHANCER OF TRY AND CPC 1 (ETC1) ENHANCER OF TRY AND CPC 1 (ETC1)
AT1G01390	1.25413	8.70919	-2.5749	-3.66768	0.00172076	0.00711285	Phosphatidylinositol 4-phosphate 5-kinase (PIP5K) enzyme family member. protein_coding	AT1G01390	8.71959	7.8141	0.170016	0.382994	0.706136	0.814973	Phosphatidylinositol 4-phosphate 5-kinase (PIP5K) enzyme family member. protein_coding	AT1G01390	2.21413	8.70919	-1.85642	-3.03695	0.00699294	0.0384366	Phosphatidylinositol 4-phosphate 5-kinase (PIP5K) enzyme family member. protein_coding	AT1G01390	3.53637	7.8141	-1.18009	-2.05577	0.0543534	0.106694	Phosphatidylinositol 4-phosphate 5-kinase (PIP5K) enzyme family member. protein_coding
AT1G01420	15.6508	23.1047	-0.575661	-2.39531	0.0274938	0.0642706	Phosphatidylinositol 4-phosphate 5-kinase (PIP5K) enzyme family member. protein_coding UDP-GLUCOSYL TRANSFERASE 72B3 (UGT72B3) UDP-GLUCOSYL TRANSFERASE 72B3 (UGT72B3)	AT1G01420	12.379	14.0563	-0.151737	-0.514089	0.61334	0.746249	Phosphatidylinositol 4-phosphate 5-kinase (PIP5K) enzyme family member. protein_coding UDP-GLUCOSYL TRANSFERASE 72B3 (UGT72B3) UDP-GLUCOSYL TRANSFERASE 72B3 (UGT72B3)	AT1G01420	11.3353	23.1047	-1.02033	-3.86476	0.00110562	0.0100782	Phosphatidylinositol 4-phosphate 5-kinase (PIP5K) enzyme family member. protein_coding UDP-GLUCOSYL TRANSFERASE 72B3 (UGT72B3) UDP-GLUCOSYL TRANSFERASE 72B3 (UGT72B3)	AT1G01420	15.3935	14.0563	0.124877	0.435548	0.668257	0.761251	Phosphatidylinositol 4-phosphate 5-kinase (PIP5K) enzyme family member. protein_coding UDP-GLUCOSYL TRANSFERASE 72B3 (UGT72B3) UDP-GLUCOSYL TRANSFERASE 72B3 (UGT72B3)
AT1G01430	167.528	110.703	0.596503	4.10004	0.000651952	0.00329077	Encodes a member of the TBL (TRICHOME BIREFRINGENCE-LIKE) gene family containing a plant-specific DUF231 (domain of unknown function) domain. TBL gene family has 46 members, two of which (TBR/AT5G06700 and TBL3/AT5G01360) have been shown to be involved in the synthesis and deposition of secondary wall cellulose, presumably by influencing the esterification state of pectic polymers.Functions as a …	AT1G01430	54.3187	68.2494	-0.318153	-2.15781	0.0444638	0.123195	Encodes a member of the TBL (TRICHOME BIREFRINGENCE-LIKE) gene family containing a plant-specific DUF231 (domain of unknown function) domain. TBL gene family has 46 members, two of which (TBR/AT5G06700 and TBL3/AT5G01360) have been shown to be involved in the synthesis and deposition of secondary wall cellulose, presumably by influencing the esterification state of pectic polymers.Functions as a …	AT1G01430	197.265	110.703	0.825293	5.68856	2.0137e-05	0.000499236	Encodes a member of the TBL (TRICHOME BIREFRINGENCE-LIKE) gene family containing a plant-specific DUF231 (domain of unknown function) domain. TBL gene family has 46 members, two of which (TBR/AT5G06700 and TBL3/AT5G01360) have been shown to be involved in the synthesis and deposition of secondary wall cellulose, presumably by influencing the esterification state of pectic polymers.Functions as a …	AT1G01430	16.9768	68.2494	-2.02277	-11.876	4.86661e-10	8.79124e-08	Encodes a member of the TBL (TRICHOME BIREFRINGENCE-LIKE) gene family containing a plant-specific DUF231 (domain of unknown function) domain. TBL gene family has 46 members, two of which (TBR/AT5G06700 and TBL3/AT5G01360) have been shown to be involved in the synthesis and deposition of secondary wall cellulose, presumably by influencing the esterification state of pectic polymers.Functions as a …
AT1G01440	29.3565	40.1876	-0.441224	-2.4454	0.0247901	0.0592608	hypothetical protein (DUF3133);(source:Araport11) protein_coding	AT1G01440	34.6476	37.0492	-0.0895787	-0.47705	0.638972	0.766041	hypothetical protein (DUF3133);(source:Araport11) protein_coding	AT1G01440	46.6518	40.1876	0.239208	1.34099	0.196327	0.367334	hypothetical protein (DUF3133);(source:Araport11) protein_coding	AT1G01440	40.3286	37.0492	0.132973	0.715616	0.483258	0.598221	hypothetical protein (DUF3133);(source:Araport11) protein_coding
AT1G01448	21.7063	24.5218	-0.18132	-1.03659	0.313428	0.433542	Natural antisense transcript overlaps with AT1G01450;(source:Araport11) antisense_long_noncoding_rna	AT1G01448	12.3004	15.0207	-0.301124	-1.35654	0.191422	0.344369	Natural antisense transcript overlaps with AT1G01450;(source:Araport11) antisense_long_noncoding_rna	AT1G01448	37.291	24.5218	0.594664	3.47067	0.00267467	0.019223	Natural antisense transcript overlaps with AT1G01450;(source:Araport11) antisense_long_noncoding_rna	AT1G01448	8.46887	15.0207	-0.785931	-3.2493	0.0043781	0.0134618	Natural antisense transcript overlaps with AT1G01450;(source:Araport11) antisense_long_noncoding_rna
AT1G01453	0.178257	0.23152	-0.705503	-0.33147	0.744054	0.817676	HeLo domain-containing mixed lineage kinase domain-like protein (MLKL). A pseudokinase, mediates necroptotic cell death in animals. protein_coding MIXED LINEAGE KINASE LIKE 1 (ATMLKL1) MIXED LINEAGE KINASE LIKE 1 (ATMLKL1)	AT1G01453	0.235043	0	2.27228	1.11471	0.279396	0.44601	HeLo domain-containing mixed lineage kinase domain-like protein (MLKL). A pseudokinase, mediates necroptotic cell death in animals. protein_coding MIXED LINEAGE KINASE LIKE 1 (ATMLKL1) MIXED LINEAGE KINASE LIKE 1 (ATMLKL1)	AT1G01453	0.0724965	0.23152	-0.0970423	-0.0465118	0.963406	0.980225	HeLo domain-containing mixed lineage kinase domain-like protein (MLKL). A pseudokinase, mediates necroptotic cell death in animals. protein_coding MIXED LINEAGE KINASE LIKE 1 (ATMLKL1) MIXED LINEAGE KINASE LIKE 1 (ATMLKL1)	AT1G01453	0.395164	0	4.3977	2.52722	0.0209032	0.0487898	HeLo domain-containing mixed lineage kinase domain-like protein (MLKL). A pseudokinase, mediates necroptotic cell death in animals. protein_coding MIXED LINEAGE KINASE LIKE 1 (ATMLKL1) MIXED LINEAGE KINASE LIKE 1 (ATMLKL1)
AT1G01470	298.738	219.052	0.465518	2.02589	0.0576046	0.116157	Encodes late-embryogenesis abundant protein whose mRNA levels are induced in response to wounding and light stress. Might be involved in protection against desiccation. protein_coding LATE EMBRYOGENESIS ABUNDANT 14 (LEA14) LATE EMBRYOGENESIS ABUNDANT 14 (LEA14);ARABIDOPSIS THALIANA LATE EMBRYOGENESIS ABUNDANT 14 (ATLEA14); (LEA1);LIGHT STRESS-REGULATED 3 (LSR3)	AT1G01470	69.8951	175.169	-1.35267	-6.13944	7.8764e-06	0.000237566	Encodes late-embryogenesis abundant protein whose mRNA levels are induced in response to wounding and light stress. Might be involved in protection against desiccation. protein_coding LATE EMBRYOGENESIS ABUNDANT 14 (LEA14) LATE EMBRYOGENESIS ABUNDANT 14 (LEA14);ARABIDOPSIS THALIANA LATE EMBRYOGENESIS ABUNDANT 14 (ATLEA14); (LEA1);LIGHT STRESS-REGULATED 3 (LSR3)	AT1G01470	168.281	219.052	-0.410626	-1.84122	0.0818548	0.207991	Encodes late-embryogenesis abundant protein whose mRNA levels are induced in response to wounding and light stress. Might be involved in protection against desiccation. protein_coding LATE EMBRYOGENESIS ABUNDANT 14 (LEA14) LATE EMBRYOGENESIS ABUNDANT 14 (LEA14);ARABIDOPSIS THALIANA LATE EMBRYOGENESIS ABUNDANT 14 (ATLEA14); (LEA1);LIGHT STRESS-REGULATED 3 (LSR3)	AT1G01470	162.468	175.169	-0.127391	-0.579404	0.569379	0.676293	Encodes late-embryogenesis abundant protein whose mRNA levels are induced in response to wounding and light stress. Might be involved in protection against desiccation. protein_coding LATE EMBRYOGENESIS ABUNDANT 14 (LEA14) LATE EMBRYOGENESIS ABUNDANT 14 (LEA14);ARABIDOPSIS THALIANA LATE EMBRYOGENESIS ABUNDANT 14 (ATLEA14); (LEA1);LIGHT STRESS-REGULATED 3 (LSR3)
AT1G01480	0.211268	0.348629	-2.66237	-1.42143	0.172006	0.272102	a member of the 1-aminocyclopropane-1-carboxylate (ACC) synthase (S-adenosyl-L-methionine methylthioadenosine-lyase, EC 4.4.1.14) gene family, isolated from a flower-specific cDNA library. protein_coding 1-AMINO-CYCLOPROPANE-1-CARBOXYLATE SYNTHASE 2 (ACS2) (AT-ACC2);1-AMINO-CYCLOPROPANE-1-CARBOXYLATE SYNTHASE 2 (ACS2)	AT1G01480	0.0871239	0.0117702	1.6717	0.790349	0.439444	0.603893	a member of the 1-aminocyclopropane-1-carboxylate (ACC) synthase (S-adenosyl-L-methionine methylthioadenosine-lyase, EC 4.4.1.14) gene family, isolated from a flower-specific cDNA library. protein_coding 1-AMINO-CYCLOPROPANE-1-CARBOXYLATE SYNTHASE 2 (ACS2) (AT-ACC2);1-AMINO-CYCLOPROPANE-1-CARBOXYLATE SYNTHASE 2 (ACS2)	AT1G01480	0.154621	0.348629	-1.07428	-0.645263	0.526763	0.688065	a member of the 1-aminocyclopropane-1-carboxylate (ACC) synthase (S-adenosyl-L-methionine methylthioadenosine-lyase, EC 4.4.1.14) gene family, isolated from a flower-specific cDNA library. protein_coding 1-AMINO-CYCLOPROPANE-1-CARBOXYLATE SYNTHASE 2 (ACS2) (AT-ACC2);1-AMINO-CYCLOPROPANE-1-CARBOXYLATE SYNTHASE 2 (ACS2)	AT1G01480	2.41383	0.0117702	6.51795	4.05845	0.00071572	0.00299538	a member of the 1-aminocyclopropane-1-carboxylate (ACC) synthase (S-adenosyl-L-methionine methylthioadenosine-lyase, EC 4.4.1.14) gene family, isolated from a flower-specific cDNA library. protein_coding 1-AMINO-CYCLOPROPANE-1-CARBOXYLATE SYNTHASE 2 (ACS2) (AT-ACC2);1-AMINO-CYCLOPROPANE-1-CARBOXYLATE SYNTHASE 2 (ACS2)
AT1G01490	105.187	167.822	-0.729522	-3.69804	0.00160749	0.00672602	Heavy metal transport/detoxification superfamily protein;(source:Araport11) protein_coding HEAVY METAL PROTEIN 1 (ATHMP01) HEAVY METAL PROTEIN 1 (ATHMP01)	AT1G01490	102.678	32.3174	1.66247	7.79372	3.16908e-07	2.54434e-05	Heavy metal transport/detoxification superfamily protein;(source:Araport11) protein_coding HEAVY METAL PROTEIN 1 (ATHMP01) HEAVY METAL PROTEIN 1 (ATHMP01)	AT1G01490	64.2607	167.822	-1.38873	-7.03873	1.31181e-06	5.85389e-05	Heavy metal transport/detoxification superfamily protein;(source:Araport11) protein_coding HEAVY METAL PROTEIN 1 (ATHMP01) HEAVY METAL PROTEIN 1 (ATHMP01)	AT1G01490	40.6444	32.3174	0.326905	1.48462	0.154661	0.24716	Heavy metal transport/detoxification superfamily protein;(source:Araport11) protein_coding HEAVY METAL PROTEIN 1 (ATHMP01) HEAVY METAL PROTEIN 1 (ATHMP01)
AT1G01500	5.19199	10.5754	-1.05226	-3.89392	0.00103553	0.00474703	Erythronate-4-phosphate dehydrogenase family protein;(source:Araport11) protein_coding	AT1G01500	7.76659	14.1034	-0.830501	-3.20251	0.00485617	0.0248456	Erythronate-4-phosphate dehydrogenase family protein;(source:Araport11) protein_coding	AT1G01500	6.55347	10.5754	-0.630844	-2.35329	0.0299719	0.106062	Erythronate-4-phosphate dehydrogenase family protein;(source:Araport11) protein_coding	AT1G01500	12.4147	14.1034	-0.171119	-0.726421	0.476768	0.592357	Erythronate-4-phosphate dehydrogenase family protein;(source:Araport11) protein_coding
AT1G01510	10.4524	27.7461	-1.41843	-7.39417	6.65682e-07	1.35105e-05	Encodes a homolog of human CtBP. Mutant has longer and thicker leaves than wild type. Involved in controlling polar cell expansion in the leaf width direction. It has been shown to localize to cytosolic stress granules and is involved in their formation. protein_coding ANGUSTIFOLIA (AN) DETORQUEO (DOQ);ANGUSTIFOLIA (AN)	AT1G01510	18.5315	27.2941	-0.563033	-2.97448	0.00801702	0.0357757	Encodes a homolog of human CtBP. Mutant has longer and thicker leaves than wild type. Involved in controlling polar cell expansion in the leaf width direction. It has been shown to localize to cytosolic stress granules and is involved in their formation. protein_coding ANGUSTIFOLIA (AN) DETORQUEO (DOQ);ANGUSTIFOLIA (AN)	AT1G01510	18.5087	27.7461	-0.569105	-3.12413	0.00577359	0.0333852	Encodes a homolog of human CtBP. Mutant has longer and thicker leaves than wild type. Involved in controlling polar cell expansion in the leaf width direction. It has been shown to localize to cytosolic stress granules and is involved in their formation. protein_coding ANGUSTIFOLIA (AN) DETORQUEO (DOQ);ANGUSTIFOLIA (AN)	AT1G01510	19.5491	27.2941	-0.489043	-2.59076	0.0182892	0.0437038	Encodes a homolog of human CtBP. Mutant has longer and thicker leaves than wild type. Involved in controlling polar cell expansion in the leaf width direction. It has been shown to localize to cytosolic stress granules and is involved in their formation. protein_coding ANGUSTIFOLIA (AN) DETORQUEO (DOQ);ANGUSTIFOLIA (AN)
AT1G01520	0.1441	0.588153	-1.38884	-0.76926	0.451552	0.569693	RVE3 is one of eleven homologous MYB-like transcription factors in Arabidopsis and a member of the RVE8 clade. Plays a minor role in clock regulation. protein_coding ALTERED SEED GERMINATION 4 (ASG4) REVEILLE 3 (REV3);ALTERED SEED GERMINATION 4 (ASG4)	AT1G01520	2.0807	0.276935	3.76892	2.27577	0.0350967	0.104247	RVE3 is one of eleven homologous MYB-like transcription factors in Arabidopsis and a member of the RVE8 clade. Plays a minor role in clock regulation. protein_coding ALTERED SEED GERMINATION 4 (ASG4) REVEILLE 3 (REV3);ALTERED SEED GERMINATION 4 (ASG4)	AT1G01520	0.777844	0.588153	-1.11636	-0.655286	0.520434	0.682684	RVE3 is one of eleven homologous MYB-like transcription factors in Arabidopsis and a member of the RVE8 clade. Plays a minor role in clock regulation. protein_coding ALTERED SEED GERMINATION 4 (ASG4) REVEILLE 3 (REV3);ALTERED SEED GERMINATION 4 (ASG4)	AT1G01520	0.854536	0.276935	2.34488	1.31263	0.205527	0.309369	RVE3 is one of eleven homologous MYB-like transcription factors in Arabidopsis and a member of the RVE8 clade. Plays a minor role in clock regulation. protein_coding ALTERED SEED GERMINATION 4 (ASG4) REVEILLE 3 (REV3);ALTERED SEED GERMINATION 4 (ASG4)
AT1G01540	63.2207	59.2293	0.0921351	0.625228	0.539538	0.647687	Protein kinase superfamily protein;(source:Araport11) protein_coding	AT1G01540	42.7337	65.78	-0.606828	-3.98286	0.000848059	0.00694226	Protein kinase superfamily protein;(source:Araport11) protein_coding	AT1G01540	50.1271	59.2293	-0.254216	-1.70291	0.105503	0.246345	Protein kinase superfamily protein;(source:Araport11) protein_coding	AT1G01540	29.4551	65.78	-1.13521	-7.16694	1.02506e-06	1.70122e-05	Protein kinase superfamily protein;(source:Araport11) protein_coding
AT1G01550	101.965	120.966	-0.288472	-1.42606	0.170683	0.270304	Encodes a protein with no functionally characterized domains that to prevent the synthesis of a novel substance that moves from the root to the shoot, where it modifies shoot growth by interfering with auxin signaling. Synthesis and delivery of this substance requires neither phloem nor endodermis. protein_coding BYPASS 1 (BPS1) BYPASS 1 (BPS1)	AT1G01550	139.436	83.0486	0.748527	3.67198	0.00170425	0.0115228	Encodes a protein with no functionally characterized domains that to prevent the synthesis of a novel substance that moves from the root to the shoot, where it modifies shoot growth by interfering with auxin signaling. Synthesis and delivery of this substance requires neither phloem nor endodermis. protein_coding BYPASS 1 (BPS1) BYPASS 1 (BPS1)	AT1G01550	145.552	120.966	0.256103	1.26102	0.223137	0.399877	Encodes a protein with no functionally characterized domains that to prevent the synthesis of a novel substance that moves from the root to the shoot, where it modifies shoot growth by interfering with auxin signaling. Synthesis and delivery of this substance requires neither phloem nor endodermis. protein_coding BYPASS 1 (BPS1) BYPASS 1 (BPS1)	AT1G01550	130.324	83.0486	0.650494	3.1983	0.00490154	0.0147714	Encodes a protein with no functionally characterized domains that to prevent the synthesis of a novel substance that moves from the root to the shoot, where it modifies shoot growth by interfering with auxin signaling. Synthesis and delivery of this substance requires neither phloem nor endodermis. protein_coding BYPASS 1 (BPS1) BYPASS 1 (BPS1)
AT1G01560	2.28472	2.00351	0.106072	0.175549	0.862576	0.905763	Member of MAP Kinase family. Flg22-induced activation is blocked by AvrRpt2. protein_coding MAP KINASE 11 (MPK11) MAP KINASE 11 (MPK11);MAP KINASE 11 (ATMPK11)	AT1G01560	8.32953	5.3526	0.604257	1.60308	0.126033	0.256699	Member of MAP Kinase family. Flg22-induced activation is blocked by AvrRpt2. protein_coding MAP KINASE 11 (MPK11) MAP KINASE 11 (MPK11);MAP KINASE 11 (ATMPK11)	AT1G01560	2.51786	2.00351	0.474731	0.782949	0.443669	0.6188	Member of MAP Kinase family. Flg22-induced activation is blocked by AvrRpt2. protein_coding MAP KINASE 11 (MPK11) MAP KINASE 11 (MPK11);MAP KINASE 11 (ATMPK11)	AT1G01560	33.4684	5.3526	2.69486	8.03003	2.06359e-07	5.33269e-06	Member of MAP Kinase family. Flg22-induced activation is blocked by AvrRpt2. protein_coding MAP KINASE 11 (MPK11) MAP KINASE 11 (MPK11);MAP KINASE 11 (ATMPK11)
AT1G01570	0.518739	1.05809	-0.796136	-1.05247	0.306281	0.425662	transferring glycosyl group transferase (DUF604);(source:Araport11) protein_coding	AT1G01570	0.619612	1.74862	-1.28406	-1.74531	0.0976942	0.214439	transferring glycosyl group transferase (DUF604);(source:Araport11) protein_coding	AT1G01570	1.10784	1.05809	-0.0648225	-0.0929817	0.926928	0.960837	transferring glycosyl group transferase (DUF604);(source:Araport11) protein_coding	AT1G01570	1.21013	1.74862	-0.350885	-0.556325	0.584726	0.690051	transferring glycosyl group transferase (DUF604);(source:Araport11) protein_coding
AT1G01580	5.61729	4.90642	0.596689	1.14341	0.267603	0.38363	Encodes the low-iron-inducible ferric chelate reductase responsible for reduction of iron at the root surface. It is likely to be the major Fe(III) chelate reductase in Arabidopsis iron metabolism. Coordinately regulated with IRT1, the major transporter responsible for high-affinity iron uptake from the soil, at both transcriptional and posttranscriptional levels. Steady state mRNA levels are reg…	AT1G01580	3.38726	1.86254	1.11144	1.3925	0.180456	0.330786	Encodes the low-iron-inducible ferric chelate reductase responsible for reduction of iron at the root surface. It is likely to be the major Fe(III) chelate reductase in Arabidopsis iron metabolism. Coordinately regulated with IRT1, the major transporter responsible for high-affinity iron uptake from the soil, at both transcriptional and posttranscriptional levels. Steady state mRNA levels are reg…	AT1G01580	3.00405	4.90642	-0.193149	-0.324542	0.749207	0.850637	Encodes the low-iron-inducible ferric chelate reductase responsible for reduction of iron at the root surface. It is likely to be the major Fe(III) chelate reductase in Arabidopsis iron metabolism. Coordinately regulated with IRT1, the major transporter responsible for high-affinity iron uptake from the soil, at both transcriptional and posttranscriptional levels. Steady state mRNA levels are reg…	AT1G01580	1.10365	1.86254	-0.541357	-0.529385	0.6029	0.705449	Encodes the low-iron-inducible ferric chelate reductase responsible for reduction of iron at the root surface. It is likely to be the major Fe(III) chelate reductase in Arabidopsis iron metabolism. Coordinately regulated with IRT1, the major transporter responsible for high-affinity iron uptake from the soil, at both transcriptional and posttranscriptional levels. Steady state mRNA levels are reg…
AT1G01600	0.428317	0.497206	0.868813	0.64136	0.529238	0.638751	Encodes a member of the CYP86A subfamily of cytochrome p450 genes. Expressed significantly at highest level in mature stems and flowers. protein_coding CYTOCHROME P450, FAMILY 86, SUBFAMILY A, POLYPEPTIDE 4 (CYP86A4) CYTOCHROME P450, FAMILY 86, SUBFAMILY A, POLYPEPTIDE 4 (CYP86A4)	AT1G01600	0.702891	0.405564	0.860437	0.775378	0.448018	0.611917	Encodes a member of the CYP86A subfamily of cytochrome p450 genes. Expressed significantly at highest level in mature stems and flowers. protein_coding CYTOCHROME P450, FAMILY 86, SUBFAMILY A, POLYPEPTIDE 4 (CYP86A4) CYTOCHROME P450, FAMILY 86, SUBFAMILY A, POLYPEPTIDE 4 (CYP86A4)	AT1G01600	0.0338478	0.497206	-2.65526	-1.42619	0.170647	0.337362	Encodes a member of the CYP86A subfamily of cytochrome p450 genes. Expressed significantly at highest level in mature stems and flowers. protein_coding CYTOCHROME P450, FAMILY 86, SUBFAMILY A, POLYPEPTIDE 4 (CYP86A4) CYTOCHROME P450, FAMILY 86, SUBFAMILY A, POLYPEPTIDE 4 (CYP86A4)	AT1G01600	0.483871	0.405564	0.130815	0.109546	0.913962	0.941267	Encodes a member of the CYP86A subfamily of cytochrome p450 genes. Expressed significantly at highest level in mature stems and flowers. protein_coding CYTOCHROME P450, FAMILY 86, SUBFAMILY A, POLYPEPTIDE 4 (CYP86A4) CYTOCHROME P450, FAMILY 86, SUBFAMILY A, POLYPEPTIDE 4 (CYP86A4)
AT1G01610	46.8347	54.313	-0.192641	-0.683157	0.503064	0.616577	bifunctional sn-glycerol-3-phosphate 2-O-acyltransferase/phosphatase. Involved in cutin assembly and is functionally redundant with GPAT8. protein_coding GLYCEROL-3-PHOSPHATE SN-2-ACYLTRANSFERASE 4 (GPAT4) GLYCEROL-3-PHOSPHATE SN-2-ACYLTRANSFERASE 4 (ATGPAT4);GLYCEROL-3-PHOSPHATE SN-2-ACYLTRANSFERASE 4 (GPAT4)	AT1G01610	40.5399	46.8651	-0.190919	-0.647224	0.525521	0.676972	bifunctional sn-glycerol-3-phosphate 2-O-acyltransferase/phosphatase. Involved in cutin assembly and is functionally redundant with GPAT8. protein_coding GLYCEROL-3-PHOSPHATE SN-2-ACYLTRANSFERASE 4 (GPAT4) GLYCEROL-3-PHOSPHATE SN-2-ACYLTRANSFERASE 4 (ATGPAT4);GLYCEROL-3-PHOSPHATE SN-2-ACYLTRANSFERASE 4 (GPAT4)	AT1G01610	26.2305	54.313	-0.970307	-3.25392	0.00433349	0.0270746	bifunctional sn-glycerol-3-phosphate 2-O-acyltransferase/phosphatase. Involved in cutin assembly and is functionally redundant with GPAT8. protein_coding GLYCEROL-3-PHOSPHATE SN-2-ACYLTRANSFERASE 4 (GPAT4) GLYCEROL-3-PHOSPHATE SN-2-ACYLTRANSFERASE 4 (ATGPAT4);GLYCEROL-3-PHOSPHATE SN-2-ACYLTRANSFERASE 4 (GPAT4)	AT1G01610	10.257	46.8651	-2.23347	-5.93286	1.20705e-05	0.000111874	bifunctional sn-glycerol-3-phosphate 2-O-acyltransferase/phosphatase. Involved in cutin assembly and is functionally redundant with GPAT8. protein_coding GLYCEROL-3-PHOSPHATE SN-2-ACYLTRANSFERASE 4 (GPAT4) GLYCEROL-3-PHOSPHATE SN-2-ACYLTRANSFERASE 4 (ATGPAT4);GLYCEROL-3-PHOSPHATE SN-2-ACYLTRANSFERASE 4 (GPAT4)
AT1G01620	198.346	376.348	-1.06979	-3.1249	0.00576372	0.0186888	a member of the plasma membrane intrinsic protein subfamily PIP1. localizes to the plasma membrane and exhibits water transport activity in Xenopus oocyte. expressed ubiquitously and protein level decreases slightly during leaf development. Involved redundantly with PIP1;1/2/4/5 in hydraulics and carbon fixation, regulates the expression of related genes that affect plant growth and development. …	AT1G01620	112.213	169.298	-0.576049	-1.76642	0.0939967	0.208491	a member of the plasma membrane intrinsic protein subfamily PIP1. localizes to the plasma membrane and exhibits water transport activity in Xenopus oocyte. expressed ubiquitously and protein level decreases slightly during leaf development. Involved redundantly with PIP1;1/2/4/5 in hydraulics and carbon fixation, regulates the expression of related genes that affect plant growth and development. …	AT1G01620	357.275	376.348	-0.135183	-0.389232	0.701596	0.818129	a member of the plasma membrane intrinsic protein subfamily PIP1. localizes to the plasma membrane and exhibits water transport activity in Xenopus oocyte. expressed ubiquitously and protein level decreases slightly during leaf development. Involved redundantly with PIP1;1/2/4/5 in hydraulics and carbon fixation, regulates the expression of related genes that affect plant growth and development. …	AT1G01620	11.9568	169.298	-3.96672	-9.30002	2.32514e-08	1.13548e-06	a member of the plasma membrane intrinsic protein subfamily PIP1. localizes to the plasma membrane and exhibits water transport activity in Xenopus oocyte. expressed ubiquitously and protein level decreases slightly during leaf development. Involved redundantly with PIP1;1/2/4/5 in hydraulics and carbon fixation, regulates the expression of related genes that affect plant growth and development. …
AT1G01630	65.835	39.1666	0.789962	3.77026	0.00136697	0.00590277	Sec14p-like phosphatidylinositol transfer family protein;(source:Araport11) protein_coding	AT1G01630	105.13	50.8632	1.04079	5.04603	7.99961e-05	0.00123694	Sec14p-like phosphatidylinositol transfer family protein;(source:Araport11) protein_coding	AT1G01630	58.337	39.1666	0.600319	2.84427	0.0106388	0.0513018	Sec14p-like phosphatidylinositol transfer family protein;(source:Araport11) protein_coding	AT1G01630	69.2321	50.8632	0.433925	2.09114	0.05072	0.100908	Sec14p-like phosphatidylinositol transfer family protein;(source:Araport11) protein_coding
AT1G01640	6.19424	3.36154	0.866364	2.37832	0.0284718	0.0661351	Putative role in flower development. Comparison of SALK_011721C to Columbia wild type resulted in a trend toward earlier flowering in the mutant (P=0.1) (Stapleton and Woodruff 2009, personal communication). protein_coding	AT1G01640	1.89645	2.5475	-0.466488	-0.80568	0.43077	0.595941	Putative role in flower development. Comparison of SALK_011721C to Columbia wild type resulted in a trend toward earlier flowering in the mutant (P=0.1) (Stapleton and Woodruff 2009, personal communication). protein_coding	AT1G01640	4.76426	3.36154	0.494212	1.27148	0.219478	0.395144	Putative role in flower development. Comparison of SALK_011721C to Columbia wild type resulted in a trend toward earlier flowering in the mutant (P=0.1) (Stapleton and Woodruff 2009, personal communication). protein_coding	AT1G01640	5.52418	2.5475	1.19452	2.58592	0.018477	0.0440742	Putative role in flower development. Comparison of SALK_011721C to Columbia wild type resulted in a trend toward earlier flowering in the mutant (P=0.1) (Stapleton and Woodruff 2009, personal communication). protein_coding
AT1G01650	47.9356	66.3426	-0.484896	-2.31575	0.0323603	0.0733888	SIGNAL PEPTIDE PEPTIDASE-LIKE 4;(source:Araport11) protein_coding SIGNAL PEPTIDE PEPTIDASE-LIKE 4 (SPPL4) ARABIDOPSIS THALIANA SIGNAL PEPTIDE PEPTIDASE-LIKE 4 (ATSPPL4);SIGNAL PEPTIDE PEPTIDASE-LIKE 4 (SPPL4)	AT1G01650	31.4931	29.1461	0.106156	0.442401	0.663382	0.783712	SIGNAL PEPTIDE PEPTIDASE-LIKE 4;(source:Araport11) protein_coding SIGNAL PEPTIDE PEPTIDASE-LIKE 4 (SPPL4) ARABIDOPSIS THALIANA SIGNAL PEPTIDE PEPTIDASE-LIKE 4 (ATSPPL4);SIGNAL PEPTIDE PEPTIDASE-LIKE 4 (SPPL4)	AT1G01650	51.2313	66.3426	-0.360655	-1.71017	0.104129	0.244361	SIGNAL PEPTIDE PEPTIDASE-LIKE 4;(source:Araport11) protein_coding SIGNAL PEPTIDE PEPTIDASE-LIKE 4 (SPPL4) ARABIDOPSIS THALIANA SIGNAL PEPTIDE PEPTIDASE-LIKE 4 (ATSPPL4);SIGNAL PEPTIDE PEPTIDASE-LIKE 4 (SPPL4)	AT1G01650	47.9441	29.1461	0.712106	3.05937	0.00665739	0.0190601	SIGNAL PEPTIDE PEPTIDASE-LIKE 4;(source:Araport11) protein_coding SIGNAL PEPTIDE PEPTIDASE-LIKE 4 (SPPL4) ARABIDOPSIS THALIANA SIGNAL PEPTIDE PEPTIDASE-LIKE 4 (ATSPPL4);SIGNAL PEPTIDE PEPTIDASE-LIKE 4 (SPPL4)
AT1G01660	1.82806	2.17613	-0.278567	-0.640434	0.529827	0.639109	Plant U-box type E3 ubiquitin ligase (PUB). protein_coding (PUB55) (PUB55)	AT1G01660	3.70649	3.40163	0.0795929	0.219238	0.82889	0.897388	Plant U-box type E3 ubiquitin ligase (PUB). protein_coding (PUB55) (PUB55)	AT1G01660	1.7146	2.17613	-0.40106	-0.871245	0.394904	0.574542	Plant U-box type E3 ubiquitin ligase (PUB). protein_coding (PUB55) (PUB55)	AT1G01660	4.32434	3.40163	0.336755	0.9496	0.354686	0.472621	Plant U-box type E3 ubiquitin ligase (PUB). protein_coding (PUB55) (PUB55)
AT1G01670	8.29766	7.76825	0.074613	0.2999	0.767632	0.836563	Plant U-box type E3 ubiquitin ligase (PUB). protein_coding (PUB56) (PUB56)	AT1G01670	7.41721	4.47985	0.735746	2.20522	0.0404529	0.115342	Plant U-box type E3 ubiquitin ligase (PUB). protein_coding (PUB56) (PUB56)	AT1G01670	5.98273	7.76825	-0.442769	-1.60633	0.125314	0.275741	Plant U-box type E3 ubiquitin ligase (PUB). protein_coding (PUB56) (PUB56)	AT1G01670	7.66818	4.47985	0.806586	2.41781	0.026247	0.0589061	Plant U-box type E3 ubiquitin ligase (PUB). protein_coding (PUB56) (PUB56)
AT1G01680	2.33501	3.02112	-0.373881	-0.888128	0.385994	0.507571	Plant U-box type E3 ubiquitin ligase (PUB). protein_coding PLANT U-BOX 54 (PUB54) PLANT U-BOX 54 (PUB54);PLANT U-BOX 54 (ATPUB54)	AT1G01680	4.76361	1.07095	2.17137	3.51132	0.0024424	0.0150394	Plant U-box type E3 ubiquitin ligase (PUB). protein_coding PLANT U-BOX 54 (PUB54) PLANT U-BOX 54 (PUB54);PLANT U-BOX 54 (ATPUB54)	AT1G01680	2.17885	3.02112	-0.610477	-1.34204	0.195995	0.367126	Plant U-box type E3 ubiquitin ligase (PUB). protein_coding PLANT U-BOX 54 (PUB54) PLANT U-BOX 54 (PUB54);PLANT U-BOX 54 (ATPUB54)	AT1G01680	26.3912	1.07095	4.72755	8.09744	1.82837e-07	4.87505e-06	Plant U-box type E3 ubiquitin ligase (PUB). protein_coding PLANT U-BOX 54 (PUB54) PLANT U-BOX 54 (PUB54);PLANT U-BOX 54 (ATPUB54)
AT1G01690	2.04318	2.2236	0.530485	0.718018	0.48181	0.59799	Encodes a novel plant-specific protein that is involved in meiotic double strand break formation. protein_coding PUTATIVE RECOMBINATION INITIATION DEFECTS 3 (PRD3) PUTATIVE RECOMBINATION INITIATION DEFECTS 3 (PRD3);ARABIDOPSIS THALIANA PUTATIVE RECOMBINATION INITIATION DEFECTS 3 (ATPRD3)	AT1G01690	2.79409	3.67476	-0.412687	-0.735756	0.471203	0.631563	Encodes a novel plant-specific protein that is involved in meiotic double strand break formation. protein_coding PUTATIVE RECOMBINATION INITIATION DEFECTS 3 (PRD3) PUTATIVE RECOMBINATION INITIATION DEFECTS 3 (PRD3);ARABIDOPSIS THALIANA PUTATIVE RECOMBINATION INITIATION DEFECTS 3 (ATPRD3)	AT1G01690	1.74718	2.2236	0.285563	0.355612	0.726196	0.834916	Encodes a novel plant-specific protein that is involved in meiotic double strand break formation. protein_coding PUTATIVE RECOMBINATION INITIATION DEFECTS 3 (PRD3) PUTATIVE RECOMBINATION INITIATION DEFECTS 3 (PRD3);ARABIDOPSIS THALIANA PUTATIVE RECOMBINATION INITIATION DEFECTS 3 (ATPRD3)	AT1G01690	5.78406	3.67476	0.598191	1.23318	0.233112	0.342548	Encodes a novel plant-specific protein that is involved in meiotic double strand break formation. protein_coding PUTATIVE RECOMBINATION INITIATION DEFECTS 3 (PRD3) PUTATIVE RECOMBINATION INITIATION DEFECTS 3 (PRD3);ARABIDOPSIS THALIANA PUTATIVE RECOMBINATION INITIATION DEFECTS 3 (ATPRD3)
AT1G01700	1.98332	0.158431	5.25594	3.13307	0.00566097	0.0184129	Encodes a member of KPP-like gene family, homolog of KPP (kinase partner protein) gene in tomato. Also a member of the RopGEF (guanine nucleotide exchange factor) family, containing the novel PRONE domain (plant-specific Rop nucleotide exchanger), which is exclusively active towards members of the Rop subfamily. protein_coding ROP (RHO OF PLANTS) GUANINE NUCLEOTIDE EXCHANGE FACTOR 2 (ROPGEF2) ROP…	AT1G01700	0.463194	1.04938	-1.10366	-1.03829	0.312658	0.481833	Encodes a member of KPP-like gene family, homolog of KPP (kinase partner protein) gene in tomato. Also a member of the RopGEF (guanine nucleotide exchange factor) family, containing the novel PRONE domain (plant-specific Rop nucleotide exchanger), which is exclusively active towards members of the Rop subfamily. protein_coding ROP (RHO OF PLANTS) GUANINE NUCLEOTIDE EXCHANGE FACTOR 2 (ROPGEF2) ROP…	AT1G01700	1.41248	0.158431	4.1388	2.39481	0.027522	0.0999916	Encodes a member of KPP-like gene family, homolog of KPP (kinase partner protein) gene in tomato. Also a member of the RopGEF (guanine nucleotide exchange factor) family, containing the novel PRONE domain (plant-specific Rop nucleotide exchanger), which is exclusively active towards members of the Rop subfamily. protein_coding ROP (RHO OF PLANTS) GUANINE NUCLEOTIDE EXCHANGE FACTOR 2 (ROPGEF2) ROP…	AT1G01700	0.307033	1.04938	-1.8541	-1.53769	0.141231	0.229585	Encodes a member of KPP-like gene family, homolog of KPP (kinase partner protein) gene in tomato. Also a member of the RopGEF (guanine nucleotide exchange factor) family, containing the novel PRONE domain (plant-specific Rop nucleotide exchanger), which is exclusively active towards members of the Rop subfamily. protein_coding ROP (RHO OF PLANTS) GUANINE NUCLEOTIDE EXCHANGE FACTOR 2 (ROPGEF2) ROP…
AT1G01710	35.1962	41.5103	-0.20803	-1.11468	0.279411	0.397163	acyl-CoA thioesterase II;(source:Araport11) protein_coding	AT1G01710	31.4138	33.2021	-0.072616	-0.360546	0.722566	0.826978	acyl-CoA thioesterase II;(source:Araport11) protein_coding	AT1G01710	51.9373	41.5103	0.341525	1.83871	0.0822396	0.208676	acyl-CoA thioesterase II;(source:Araport11) protein_coding	AT1G01710	26.8643	33.2021	-0.303323	-1.4781	0.156383	0.249423	acyl-CoA thioesterase II;(source:Araport11) protein_coding
AT1G01715	0.910291	0.262237	1.22483	1.20219	0.244611	0.357543	hypothetical protein;(source:Araport11) protein_coding	AT1G01715	0.946023	0.419518	1.16416	1.2458	0.228548	0.387907	hypothetical protein;(source:Araport11) protein_coding	AT1G01715	1.09812	0.262237	1.77364	1.78725	0.090467	0.222244	hypothetical protein;(source:Araport11) protein_coding	AT1G01715	0.582628	0.419518	0.409043	0.403347	0.691366	0.778228	hypothetical protein;(source:Araport11) protein_coding
AT1G01720	9.46402	9.83867	-0.0839496	-0.32877	0.746061	0.819185	Belongs to a large family of putative transcriptional activators with NAC domain. Transcript level increases in response to wounding and abscisic acid. ATAF1 attentuates ABA signaling and sythesis. Mutants are hyposensitive to ABA. The mRNA is cell-to-cell mobile. protein_coding (ATAF1) (ATAF1); (ANAC2);ARABIDOPSIS NAC DOMAIN CONTAINING PROTEIN 2 (ANAC002)	AT1G01720	11.5803	6.86938	0.77183	2.58873	0.0183677	0.0654046	Belongs to a large family of putative transcriptional activators with NAC domain. Transcript level increases in response to wounding and abscisic acid. ATAF1 attentuates ABA signaling and sythesis. Mutants are hyposensitive to ABA. The mRNA is cell-to-cell mobile. protein_coding (ATAF1) (ATAF1); (ANAC2);ARABIDOPSIS NAC DOMAIN CONTAINING PROTEIN 2 (ANAC002)	AT1G01720	8.53413	9.83867	-0.198049	-0.730869	0.474111	0.646166	Belongs to a large family of putative transcriptional activators with NAC domain. Transcript level increases in response to wounding and abscisic acid. ATAF1 attentuates ABA signaling and sythesis. Mutants are hyposensitive to ABA. The mRNA is cell-to-cell mobile. protein_coding (ATAF1) (ATAF1); (ANAC2);ARABIDOPSIS NAC DOMAIN CONTAINING PROTEIN 2 (ANAC002)	AT1G01720	19.7048	6.86938	1.5098	5.332	4.30518e-05	0.000309513	Belongs to a large family of putative transcriptional activators with NAC domain. Transcript level increases in response to wounding and abscisic acid. ATAF1 attentuates ABA signaling and sythesis. Mutants are hyposensitive to ABA. The mRNA is cell-to-cell mobile. protein_coding (ATAF1) (ATAF1); (ANAC2);ARABIDOPSIS NAC DOMAIN CONTAINING PROTEIN 2 (ANAC002)
AT1G01725	9.58948	6.68056	0.568416	1.98556	0.0622701	0.123496	adenylosuccinate synthetase;(source:Araport11) protein_coding	AT1G01725	3.47767	1.34642	1.28414	2.042	0.05583	0.145053	adenylosuccinate synthetase;(source:Araport11) protein_coding	AT1G01725	5.44122	6.68056	-0.344996	-1.04501	0.309623	0.491125	adenylosuccinate synthetase;(source:Araport11) protein_coding	AT1G01725	1.91085	1.34642	0.455272	0.656146	0.519894	0.633127	adenylosuccinate synthetase;(source:Araport11) protein_coding
AT1G01730	13.5037	13.7158	-0.12353	-0.431241	0.671329	0.759728	hypothetical protein;(source:Araport11) protein_coding	AT1G01730	3.4167	6.17639	-0.828855	-1.63953	0.118174	0.245531	hypothetical protein;(source:Araport11) protein_coding	AT1G01730	10.4414	13.7158	-0.378656	-1.23794	0.231381	0.409691	hypothetical protein;(source:Araport11) protein_coding	AT1G01730	17.9712	6.17639	1.59295	4.21958	0.000498715	0.00223027	hypothetical protein;(source:Araport11) protein_coding
AT1G01740	5.86278	3.77774	0.757572	2.05118	0.0548411	0.111722	kinase with tetratricopeptide repeat domain-containing protein;(source:Araport11) protein_coding BRASSINOSTEROID-SIGNALING KINASE 4 (BSK4) BRASSINOSTEROID-SIGNALING KINASE 4 (BSK4)	AT1G01740	5.34635	2.92028	0.941076	2.15312	0.0448801	0.124013	kinase with tetratricopeptide repeat domain-containing protein;(source:Araport11) protein_coding BRASSINOSTEROID-SIGNALING KINASE 4 (BSK4) BRASSINOSTEROID-SIGNALING KINASE 4 (BSK4)	AT1G01740	4.97485	3.77774	0.532928	1.36206	0.189708	0.36015	kinase with tetratricopeptide repeat domain-containing protein;(source:Araport11) protein_coding BRASSINOSTEROID-SIGNALING KINASE 4 (BSK4) BRASSINOSTEROID-SIGNALING KINASE 4 (BSK4)	AT1G01740	2.35659	2.92028	-0.255128	-0.486865	0.632133	0.730644	kinase with tetratricopeptide repeat domain-containing protein;(source:Araport11) protein_coding BRASSINOSTEROID-SIGNALING KINASE 4 (BSK4) BRASSINOSTEROID-SIGNALING KINASE 4 (BSK4)
AT1G01760	3.57815	4.22826	-0.18785	-0.484754	0.633601	0.729066	denosine deaminases acting on tRNA;(source:Araport11) protein_coding ORTHOLOG OF YEAST TAD1 (TAD1) (ATTAD1);ORTHOLOG OF YEAST TAD1 (TAD1)	AT1G01760	2.29321	2.58177	-0.1535	-0.277966	0.784154	0.86867	denosine deaminases acting on tRNA;(source:Araport11) protein_coding ORTHOLOG OF YEAST TAD1 (TAD1) (ATTAD1);ORTHOLOG OF YEAST TAD1 (TAD1)	AT1G01760	3.50657	4.22826	-0.349144	-0.821216	0.42209	0.600152	denosine deaminases acting on tRNA;(source:Araport11) protein_coding ORTHOLOG OF YEAST TAD1 (TAD1) (ATTAD1);ORTHOLOG OF YEAST TAD1 (TAD1)	AT1G01760	1.75575	2.58177	-0.522359	-0.865771	0.397821	0.516187	denosine deaminases acting on tRNA;(source:Araport11) protein_coding ORTHOLOG OF YEAST TAD1 (TAD1) (ATTAD1);ORTHOLOG OF YEAST TAD1 (TAD1)
AT1G01770	23.4284	65.089	-1.50836	-8.2637	1.35995e-07	3.97967e-06	propionyl-CoA carboxylase;(source:Araport11) protein_coding	AT1G01770	19.2169	23.6119	-0.266353	-1.2181	0.238653	0.399712	propionyl-CoA carboxylase;(source:Araport11) protein_coding	AT1G01770	49.1192	65.089	-0.398836	-2.26363	0.0359696	0.121039	propionyl-CoA carboxylase;(source:Araport11) protein_coding	AT1G01770	9.11605	23.6119	-1.34843	-5.25467	5.08618e-05	0.000355484	propionyl-CoA carboxylase;(source:Araport11) protein_coding
AT1G01780	6.13634	27.3151	-2.13741	-9.3408	2.17484e-08	9.75149e-07	Encodes a member of the Arabidopsis LIM proteins: a family of actin bundlers with distinct expression patterns. WLIM1, WLIM2a, and WLIM2b are widely expressed, whereas PLIM2a, PLIM2b, and PLIM2c are predominantly expressed in pollen. Regulates actin cytoskeleton organization. The mRNA is cell-to-cell mobile. protein_coding PLIM2B (PLIM2b) PLIM2B (PLIM2b)	AT1G01780	3.09004	9.6809	-1.66283	-4.46171	0.000290366	0.00316934	Encodes a member of the Arabidopsis LIM proteins: a family of actin bundlers with distinct expression patterns. WLIM1, WLIM2a, and WLIM2b are widely expressed, whereas PLIM2a, PLIM2b, and PLIM2c are predominantly expressed in pollen. Regulates actin cytoskeleton organization. The mRNA is cell-to-cell mobile. protein_coding PLIM2B (PLIM2b) PLIM2B (PLIM2b)	AT1G01780	17.2115	27.3151	-0.668602	-3.43856	0.00287347	0.0202794	Encodes a member of the Arabidopsis LIM proteins: a family of actin bundlers with distinct expression patterns. WLIM1, WLIM2a, and WLIM2b are widely expressed, whereas PLIM2a, PLIM2b, and PLIM2c are predominantly expressed in pollen. Regulates actin cytoskeleton organization. The mRNA is cell-to-cell mobile. protein_coding PLIM2B (PLIM2b) PLIM2B (PLIM2b)	AT1G01780	3.00288	9.6809	-1.60225	-4.23389	0.000482993	0.00217549	Encodes a member of the Arabidopsis LIM proteins: a family of actin bundlers with distinct expression patterns. WLIM1, WLIM2a, and WLIM2b are widely expressed, whereas PLIM2a, PLIM2b, and PLIM2c are predominantly expressed in pollen. Regulates actin cytoskeleton organization. The mRNA is cell-to-cell mobile. protein_coding PLIM2B (PLIM2b) PLIM2B (PLIM2b)
AT1G01790	143.934	140.14	0.0173623	0.0851484	0.933068	0.955516	Encodes a member of the cation/proton antiporters-2 antiporter superfamily, the K efflux antiporter KEA1 that is localized to the chloroplast envelope. protein_coding K+ EFFLUX ANTIPORTER 1 (KEA1) K+ EFFLUX ANTIPORTER 1 (ATKEA1);K+ EFFLUX ANTIPORTER 1 (KEA1)	AT1G01790	158.445	249.729	-0.649066	-3.17377	0.00517461	0.0260911	Encodes a member of the cation/proton antiporters-2 antiporter superfamily, the K efflux antiporter KEA1 that is localized to the chloroplast envelope. protein_coding K+ EFFLUX ANTIPORTER 1 (KEA1) K+ EFFLUX ANTIPORTER 1 (ATKEA1);K+ EFFLUX ANTIPORTER 1 (KEA1)	AT1G01790	145.991	140.14	0.0533219	0.263181	0.79535	0.88025	Encodes a member of the cation/proton antiporters-2 antiporter superfamily, the K efflux antiporter KEA1 that is localized to the chloroplast envelope. protein_coding K+ EFFLUX ANTIPORTER 1 (KEA1) K+ EFFLUX ANTIPORTER 1 (ATKEA1);K+ EFFLUX ANTIPORTER 1 (KEA1)	AT1G01790	84.4603	249.729	-1.58245	-7.77078	3.3051e-07	7.36571e-06	Encodes a member of the cation/proton antiporters-2 antiporter superfamily, the K efflux antiporter KEA1 that is localized to the chloroplast envelope. protein_coding K+ EFFLUX ANTIPORTER 1 (KEA1) K+ EFFLUX ANTIPORTER 1 (ATKEA1);K+ EFFLUX ANTIPORTER 1 (KEA1)
AT1G01800	37.6833	26.9924	0.465278	2.56782	0.0191953	0.0486671	NAD(P)-binding Rossmann-fold superfamily protein;(source:Araport11) protein_coding	AT1G01800	24.5516	28.3192	-0.213145	-1.09145	0.289231	0.457509	NAD(P)-binding Rossmann-fold superfamily protein;(source:Araport11) protein_coding	AT1G01800	28.4135	26.9924	0.0784838	0.418821	0.68022	0.803022	NAD(P)-binding Rossmann-fold superfamily protein;(source:Araport11) protein_coding	AT1G01800	25.6818	28.3192	-0.1601	-0.820585	0.422441	0.540038	NAD(P)-binding Rossmann-fold superfamily protein;(source:Araport11) protein_coding
AT1G01810	0.586313	2.23068	-2.74966	-3.26097	0.0042663	0.0146931	hypothetical protein;(source:Araport11) protein_coding	AT1G01810	0.717715	0.430303	0.673753	0.639223	0.530597	0.680896	hypothetical protein;(source:Araport11) protein_coding	AT1G01810	0.578422	2.23068	-1.91016	-2.55633	0.0196648	0.0792287	hypothetical protein;(source:Araport11) protein_coding	AT1G01810	0.625516	0.430303	0.588966	0.5452	0.592198	0.696178	hypothetical protein;(source:Araport11) protein_coding
AT1G01820	48.4776	69.8199	-0.521033	-4.07539	0.000689013	0.00342901	member of the peroxin11 (PEX11) gene family, integral to peroxisome membrane, controls peroxisome proliferation. protein_coding PEROXIN 11C (PEX11C) PEROXIN 11C (PEX11C)	AT1G01820	29.9322	30.085	-0.02096	-0.142619	0.888149	0.933962	member of the peroxin11 (PEX11) gene family, integral to peroxisome membrane, controls peroxisome proliferation. protein_coding PEROXIN 11C (PEX11C) PEROXIN 11C (PEX11C)	AT1G01820	40.9346	69.8199	-0.765469	-5.87266	1.36834e-05	0.000368824	member of the peroxin11 (PEX11) gene family, integral to peroxisome membrane, controls peroxisome proliferation. protein_coding PEROXIN 11C (PEX11C) PEROXIN 11C (PEX11C)	AT1G01820	38.4178	30.085	0.356867	2.47855	0.0231399	0.0531258	member of the peroxin11 (PEX11) gene family, integral to peroxisome membrane, controls peroxisome proliferation. protein_coding PEROXIN 11C (PEX11C) PEROXIN 11C (PEX11C)
AT1G01830	17.5076	52.3951	-1.66996	-6.73792	2.36049e-06	3.63794e-05	ARM repeat superfamily protein;(source:Araport11) protein_coding	AT1G01830	30.6962	26.2681	0.220114	0.836164	0.413845	0.580841	ARM repeat superfamily protein;(source:Araport11) protein_coding	AT1G01830	28.5122	52.3951	-0.904761	-3.76705	0.00137684	0.0118005	ARM repeat superfamily protein;(source:Araport11) protein_coding	AT1G01830	31.3821	26.2681	0.262243	0.995655	0.332398	0.449458	ARM repeat superfamily protein;(source:Araport11) protein_coding
AT1G01840	0.149405	0.645049	-3.10119	-2.32836	0.0315389	0.0718296	AP2-like ethylene-responsive transcription factor SNZ;(source:Araport11) protein_coding	AT1G01840	0.304147	1.25142	-2.31319	-2.14405	0.0456946	0.125617	AP2-like ethylene-responsive transcription factor SNZ;(source:Araport11) protein_coding	AT1G01840	0.615575	0.645049	-0.13034	-0.142505	0.888238	0.938704	AP2-like ethylene-responsive transcription factor SNZ;(source:Araport11) protein_coding	AT1G01840	0.183331	1.25142	-3.6549	-2.76136	0.0127194	0.0324677	AP2-like ethylene-responsive transcription factor SNZ;(source:Araport11) protein_coding
AT1G01860	8.89557	11.0659	-0.308423	-1.00547	0.327778	0.448537	dimethyladenosine transferase protein_coding PALEFACE 1 (PFC1) PALEFACE 1 (PFC1)	AT1G01860	9.51847	9.90066	-0.165516	-0.483563	0.63443	0.762525	dimethyladenosine transferase protein_coding PALEFACE 1 (PFC1) PALEFACE 1 (PFC1)	AT1G01860	11.219	11.0659	-0.0140277	-0.0453383	0.964329	0.980453	dimethyladenosine transferase protein_coding PALEFACE 1 (PFC1) PALEFACE 1 (PFC1)	AT1G01860	3.36835	9.90066	-1.57612	-3.45116	0.0027938	0.00924394	dimethyladenosine transferase protein_coding PALEFACE 1 (PFC1) PALEFACE 1 (PFC1)
AT1G01880	1.84506	1.09594	2.0901	2.28861	0.0341957	0.0766446	Encodes one of two GEN1 homologs in Arabidopsis. It is a member of the class IV Rad2/XPG family of nucleases that processes Holliday junctions in a manner analogous to the HJ resolvases of phages, archaea, and bacteria. protein_coding ORTHOLOG OF HSGEN1 (GEN1) (ATGEN1);ORTHOLOG OF HSGEN1 (GEN1)	AT1G01880	0.690879	0.85991	-0.39032	-0.404515	0.690522	0.803923	Encodes one of two GEN1 homologs in Arabidopsis. It is a member of the class IV Rad2/XPG family of nucleases that processes Holliday junctions in a manner analogous to the HJ resolvases of phages, archaea, and bacteria. protein_coding ORTHOLOG OF HSGEN1 (GEN1) (ATGEN1);ORTHOLOG OF HSGEN1 (GEN1)	AT1G01880	1.96338	1.09594	2.06797	2.23268	0.0382849	0.125965	Encodes one of two GEN1 homologs in Arabidopsis. It is a member of the class IV Rad2/XPG family of nucleases that processes Holliday junctions in a manner analogous to the HJ resolvases of phages, archaea, and bacteria. protein_coding ORTHOLOG OF HSGEN1 (GEN1) (ATGEN1);ORTHOLOG OF HSGEN1 (GEN1)	AT1G01880	0.596502	0.85991	-0.634386	-0.629692	0.536678	0.647647	Encodes one of two GEN1 homologs in Arabidopsis. It is a member of the class IV Rad2/XPG family of nucleases that processes Holliday junctions in a manner analogous to the HJ resolvases of phages, archaea, and bacteria. protein_coding ORTHOLOG OF HSGEN1 (GEN1) (ATGEN1);ORTHOLOG OF HSGEN1 (GEN1)
AT1G01900	11.397	9.50996	0.204123	0.334673	0.741676	0.816039	Encodes AtSBT1.1, a subtilisin-like serine protease. Cleaves the phytosulfokine AtPSK4, a growth promoting peptide. protein_coding (SBTI1.1) (SBTI1.1); (ATSBT1.1)	AT1G01900	2.14394	10.8877	-2.34759	-2.47979	0.0230804	0.0769361	Encodes AtSBT1.1, a subtilisin-like serine protease. Cleaves the phytosulfokine AtPSK4, a growth promoting peptide. protein_coding (SBTI1.1) (SBTI1.1); (ATSBT1.1)	AT1G01900	11.6011	9.50996	0.687866	1.13417	0.271359	0.452786	Encodes AtSBT1.1, a subtilisin-like serine protease. Cleaves the phytosulfokine AtPSK4, a growth promoting peptide. protein_coding (SBTI1.1) (SBTI1.1); (ATSBT1.1)	AT1G01900	5.122	10.8877	-1.42291	-1.93435	0.0686807	0.129069	Encodes AtSBT1.1, a subtilisin-like serine protease. Cleaves the phytosulfokine AtPSK4, a growth promoting peptide. protein_coding (SBTI1.1) (SBTI1.1); (ATSBT1.1)
AT1G01910	28.1035	24.8828	0.184209	0.943444	0.35774	0.479001	Subunit of GET complex. Interacts with GET2 in the presence of GET1. protein_coding GUIDED ENTRY OF TAIL-ANCHORED PROTEIN 3A (GET3A) GUIDED ENTRY OF TAIL-ANCHORED PROTEIN 3A (GET3A);GUIDED ENTRY OF TAIL-ANCHORED PROTEIN 3A (ATGET3A)	AT1G01910	27.8007	27.0032	0.0342065	0.168592	0.867966	0.921999	Subunit of GET complex. Interacts with GET2 in the presence of GET1. protein_coding GUIDED ENTRY OF TAIL-ANCHORED PROTEIN 3A (GET3A) GUIDED ENTRY OF TAIL-ANCHORED PROTEIN 3A (GET3A);GUIDED ENTRY OF TAIL-ANCHORED PROTEIN 3A (ATGET3A)	AT1G01910	25.4273	24.8828	0.0493534	0.245347	0.808917	0.888929	Subunit of GET complex. Interacts with GET2 in the presence of GET1. protein_coding GUIDED ENTRY OF TAIL-ANCHORED PROTEIN 3A (GET3A) GUIDED ENTRY OF TAIL-ANCHORED PROTEIN 3A (GET3A);GUIDED ENTRY OF TAIL-ANCHORED PROTEIN 3A (ATGET3A)	AT1G01910	24.9256	27.0032	-0.120962	-0.586958	0.564402	0.671893	Subunit of GET complex. Interacts with GET2 in the presence of GET1. protein_coding GUIDED ENTRY OF TAIL-ANCHORED PROTEIN 3A (GET3A) GUIDED ENTRY OF TAIL-ANCHORED PROTEIN 3A (GET3A);GUIDED ENTRY OF TAIL-ANCHORED PROTEIN 3A (ATGET3A)
AT1G01920	4.47218	6.40966	-0.532706	-1.63984	0.11811	0.202169	SET domain-containing protein;(source:Araport11) protein_coding	AT1G01920	7.07285	5.41095	0.381951	1.11748	0.278242	0.444766	SET domain-containing protein;(source:Araport11) protein_coding	AT1G01920	5.39599	6.40966	-0.216279	-0.665898	0.513781	0.678219	SET domain-containing protein;(source:Araport11) protein_coding	AT1G01920	7.41942	5.41095	0.436715	1.28337	0.215374	0.321435	SET domain-containing protein;(source:Araport11) protein_coding
AT1G01930	16.7524	18.9425	-0.188434	-1.03772	0.312914	0.433078	zinc finger protein-like protein;(source:Araport11) protein_coding	AT1G01930	16.0233	17.4557	-0.122868	-0.617638	0.544422	0.691692	zinc finger protein-like protein;(source:Araport11) protein_coding	AT1G01930	13.9804	18.9425	-0.43268	-2.25445	0.0366422	0.122469	zinc finger protein-like protein;(source:Araport11) protein_coding	AT1G01930	14.8568	17.4557	-0.240995	-1.18898	0.249644	0.361219	zinc finger protein-like protein;(source:Araport11) protein_coding
AT1G01940	9.01311	3.53977	1.46096	3.86712	0.00109977	0.00496785	Cyclophilin-like peptidyl-prolyl cis-trans isomerase family protein;(source:Araport11) protein_coding	AT1G01940	6.37737	3.55194	0.859963	2.07153	0.0527057	0.139469	Cyclophilin-like peptidyl-prolyl cis-trans isomerase family protein;(source:Araport11) protein_coding	AT1G01940	5.06488	3.53977	0.489578	1.18426	0.251461	0.431724	Cyclophilin-like peptidyl-prolyl cis-trans isomerase family protein;(source:Araport11) protein_coding	AT1G01940	8.92066	3.55194	1.40285	3.51154	0.00244119	0.00828442	Cyclophilin-like peptidyl-prolyl cis-trans isomerase family protein;(source:Araport11) protein_coding
AT1G01950	12.6629	14.0962	-0.167241	-0.768489	0.451998	0.570027	Encodes a member of the armadillo/beta-catenin repeat kinesin motor family. Mutants have twisted roots due to abnormal cell file rotation; the phenotype is dependent on microtubules. protein_coding ARMADILLO REPEAT KINESIN 2 (ARK2) ARABIDOPSIS THALIANA KINESIN UNGROUPED CLADE, GENE B (AtKINUb);ARMADILLO REPEAT KINESIN 2 (ARK2)	AT1G01950	14.492	14.4529	0.0100826	0.0439015	0.965458	0.97906	Encodes a member of the armadillo/beta-catenin repeat kinesin motor family. Mutants have twisted roots due to abnormal cell file rotation; the phenotype is dependent on microtubules. protein_coding ARMADILLO REPEAT KINESIN 2 (ARK2) ARABIDOPSIS THALIANA KINESIN UNGROUPED CLADE, GENE B (AtKINUb);ARMADILLO REPEAT KINESIN 2 (ARK2)	AT1G01950	11.2276	14.0962	-0.329672	-1.43441	0.168318	0.334943	Encodes a member of the armadillo/beta-catenin repeat kinesin motor family. Mutants have twisted roots due to abnormal cell file rotation; the phenotype is dependent on microtubules. protein_coding ARMADILLO REPEAT KINESIN 2 (ARK2) ARABIDOPSIS THALIANA KINESIN UNGROUPED CLADE, GENE B (AtKINUb);ARMADILLO REPEAT KINESIN 2 (ARK2)	AT1G01950	13.921	14.4529	-0.0580187	-0.249592	0.805682	0.866232	Encodes a member of the armadillo/beta-catenin repeat kinesin motor family. Mutants have twisted roots due to abnormal cell file rotation; the phenotype is dependent on microtubules. protein_coding ARMADILLO REPEAT KINESIN 2 (ARK2) ARABIDOPSIS THALIANA KINESIN UNGROUPED CLADE, GENE B (AtKINUb);ARMADILLO REPEAT KINESIN 2 (ARK2)
AT1G01960	51.9488	138.364	-1.41223	-11.0477	1.56671e-09	1.34401e-07	Encodes one of the functionally redundant ARF guanine-nucleotide exchange factors (ARF-GEFs). Functions as regulators of post-Golgi trafficking. protein_coding EMBRYO SAC DEVELOPMENT ARREST 10 (EDA10) BIG3 (BIG3);EMBRYO SAC DEVELOPMENT ARREST 10 (EDA10)	AT1G01960	111.201	132.338	-0.247699	-1.94091	0.0678278	0.166442	Encodes one of the functionally redundant ARF guanine-nucleotide exchange factors (ARF-GEFs). Functions as regulators of post-Golgi trafficking. protein_coding EMBRYO SAC DEVELOPMENT ARREST 10 (EDA10) BIG3 (BIG3);EMBRYO SAC DEVELOPMENT ARREST 10 (EDA10)	AT1G01960	98.2921	138.364	-0.505368	-3.957	0.000898752	0.00868116	Encodes one of the functionally redundant ARF guanine-nucleotide exchange factors (ARF-GEFs). Functions as regulators of post-Golgi trafficking. protein_coding EMBRYO SAC DEVELOPMENT ARREST 10 (EDA10) BIG3 (BIG3);EMBRYO SAC DEVELOPMENT ARREST 10 (EDA10)	AT1G01960	129.744	132.338	-0.0278914	-0.218491	0.829464	0.883248	Encodes one of the functionally redundant ARF guanine-nucleotide exchange factors (ARF-GEFs). Functions as regulators of post-Golgi trafficking. protein_coding EMBRYO SAC DEVELOPMENT ARREST 10 (EDA10) BIG3 (BIG3);EMBRYO SAC DEVELOPMENT ARREST 10 (EDA10)
AT1G01970	12.4495	11.3918	0.175414	0.59334	0.560214	0.665662	Tetratricopeptide repeat (TPR)-like superfamily protein;(source:Araport11) protein_coding	AT1G01970	13.3385	20.1941	-0.576192	-2.06067	0.0538361	0.141556	Tetratricopeptide repeat (TPR)-like superfamily protein;(source:Araport11) protein_coding	AT1G01970	12.0863	11.3918	0.100492	0.32799	0.746641	0.848948	Tetratricopeptide repeat (TPR)-like superfamily protein;(source:Araport11) protein_coding	AT1G01970	6.12772	20.1941	-1.7294	-4.99792	8.88565e-05	0.000553864	Tetratricopeptide repeat (TPR)-like superfamily protein;(source:Araport11) protein_coding
AT1G01990	25.1282	32.2164	-0.3909	-1.87944	0.0762004	0.144298	hypothetical protein;(source:Araport11) protein_coding	AT1G01990	14.8532	17.3577	-0.222484	-0.855042	0.403581	0.571498	hypothetical protein;(source:Araport11) protein_coding	AT1G01990	28.382	32.2164	-0.168537	-0.802597	0.432505	0.608536	hypothetical protein;(source:Araport11) protein_coding	AT1G01990	15.9972	17.3577	-0.110453	-0.427967	0.673668	0.764956	hypothetical protein;(source:Araport11) protein_coding
AT1G02000	8.63736	10.6868	-0.342615	-1.37409	0.186006	0.288467	UDP-D-glucuronate 4-epimerase The mRNA is cell-to-cell mobile. protein_coding UDP-D-GLUCURONATE 4-EPIMERASE 2 (GAE2) UDP-D-GLUCURONATE 4-EPIMERASE 2 (GAE2)	AT1G02000	11.0095	12.0222	-0.0720806	-0.282129	0.78101	0.866597	UDP-D-glucuronate 4-epimerase The mRNA is cell-to-cell mobile. protein_coding UDP-D-GLUCURONATE 4-EPIMERASE 2 (GAE2) UDP-D-GLUCURONATE 4-EPIMERASE 2 (GAE2)	AT1G02000	9.40572	10.6868	-0.223312	-0.872468	0.394254	0.573951	UDP-D-glucuronate 4-epimerase The mRNA is cell-to-cell mobile. protein_coding UDP-D-GLUCURONATE 4-EPIMERASE 2 (GAE2) UDP-D-GLUCURONATE 4-EPIMERASE 2 (GAE2)	AT1G02000	7.69106	12.0222	-0.587455	-2.10925	0.0489451	0.0981043	UDP-D-glucuronate 4-epimerase The mRNA is cell-to-cell mobile. protein_coding UDP-D-GLUCURONATE 4-EPIMERASE 2 (GAE2) UDP-D-GLUCURONATE 4-EPIMERASE 2 (GAE2)
AT1G02010	12.7627	12.9019	0.0324875	0.147755	0.884151	0.921174	member of KEULE Gene Family protein_coding SECRETORY 1A (SEC1A) SECRETORY 1A (SEC1A)	AT1G02010	13.8902	12.4447	0.179013	0.761379	0.456128	0.618855	member of KEULE Gene Family protein_coding SECRETORY 1A (SEC1A) SECRETORY 1A (SEC1A)	AT1G02010	12.909	12.9019	0.0376708	0.166227	0.869801	0.926628	member of KEULE Gene Family protein_coding SECRETORY 1A (SEC1A) SECRETORY 1A (SEC1A)	AT1G02010	6.64885	12.4447	-0.886422	-3.20281	0.0048529	0.0146531	member of KEULE Gene Family protein_coding SECRETORY 1A (SEC1A) SECRETORY 1A (SEC1A)
AT1G02020	14.3466	29.8655	-1.05746	-5.00976	8.65869e-05	0.000640941	nitroreductase family protein;(source:Araport11) protein_coding	AT1G02020	31.5375	24.6014	0.355783	1.68332	0.10929	0.232188	nitroreductase family protein;(source:Araport11) protein_coding	AT1G02020	34.0718	29.8655	0.202658	1.02472	0.318848	0.50113	nitroreductase family protein;(source:Araport11) protein_coding	AT1G02020	23.2798	24.6014	-0.0570706	-0.26106	0.796961	0.860149	nitroreductase family protein;(source:Araport11) protein_coding
AT1G02050	2.5233	6.00281	-0.943357	-1.75299	0.0963342	0.172805	Chalcone and stilbene synthase family protein;(source:Araport11) protein_coding LESS ADHESIVE POLLEN 6 (LAP6) POLYKETIDE SYNTHASE A (PKSA);LESS ADHESIVE POLLEN 6 (LAP6)	AT1G02050	1.34248	2.41291	-1.15405	-1.3347	0.19834	0.352895	Chalcone and stilbene synthase family protein;(source:Araport11) protein_coding LESS ADHESIVE POLLEN 6 (LAP6) POLYKETIDE SYNTHASE A (PKSA);LESS ADHESIVE POLLEN 6 (LAP6)	AT1G02050	4.56851	6.00281	0.0414021	0.0853948	0.932875	0.963948	Chalcone and stilbene synthase family protein;(source:Araport11) protein_coding LESS ADHESIVE POLLEN 6 (LAP6) POLYKETIDE SYNTHASE A (PKSA);LESS ADHESIVE POLLEN 6 (LAP6)	AT1G02050	2.61342	2.41291	0.114635	0.16175	0.873274	0.914046	Chalcone and stilbene synthase family protein;(source:Araport11) protein_coding LESS ADHESIVE POLLEN 6 (LAP6) POLYKETIDE SYNTHASE A (PKSA);LESS ADHESIVE POLLEN 6 (LAP6)
AT1G02060	5.53561	8.44546	-0.637703	-1.86277	0.0786233	0.14794	Tetratricopeptide repeat (TPR)-like superfamily protein;(source:Araport11) protein_coding	AT1G02060	5.90156	4.35736	0.381284	0.851333	0.405584	0.573342	Tetratricopeptide repeat (TPR)-like superfamily protein;(source:Araport11) protein_coding	AT1G02060	7.39484	8.44546	-0.280514	-0.819346	0.423129	0.60122	Tetratricopeptide repeat (TPR)-like superfamily protein;(source:Araport11) protein_coding	AT1G02060	4.66646	4.35736	0.0857868	0.182405	0.85727	0.903739	Tetratricopeptide repeat (TPR)-like superfamily protein;(source:Araport11) protein_coding
AT1G02080	202.454	313.375	-0.629009	-5.02915	8.29981e-05	0.000618518	Acts as scaffold protein in the CCR4-NOT complex, by interacting with various NOT proteins and CAF1. Essential protein for proper pollen development and germination capacity. protein_coding (NOT1) (NOT1)	AT1G02080	169.688	219.582	-0.374226	-3.09529	0.00615209	0.0295293	Acts as scaffold protein in the CCR4-NOT complex, by interacting with various NOT proteins and CAF1. Essential protein for proper pollen development and germination capacity. protein_coding (NOT1) (NOT1)	AT1G02080	371.113	313.375	0.241322	1.90452	0.0726793	0.192172	Acts as scaffold protein in the CCR4-NOT complex, by interacting with various NOT proteins and CAF1. Essential protein for proper pollen development and germination capacity. protein_coding (NOT1) (NOT1)	AT1G02080	259.625	219.582	0.241432	1.97286	0.0638076	0.12159	Acts as scaffold protein in the CCR4-NOT complex, by interacting with various NOT proteins and CAF1. Essential protein for proper pollen development and germination capacity. protein_coding (NOT1) (NOT1)
AT1G02090	21.2033	13.4645	0.605492	2.36735	0.0291206	0.0674004	encodes a phosphoprotein that is a subunit of the COP9 signalosome. Mutants exhibit constitutive photomorphogenic phenotype. protein_coding FUSCA 5 (FUS5) FUSCA 5 (FUS5);ARABIDOPSIS THALIANA COP9 SIGNALOSOME SUBUNIT 7 (ATCSN7);CONSTITUTIVE PHOTOMORPHOGENIC 15 (COP15);COP9 SIGNALOSOME SUBUNIT 7 (CSN7)	AT1G02090	17.3588	13.9466	0.288855	1.05083	0.307013	0.476092	encodes a phosphoprotein that is a subunit of the COP9 signalosome. Mutants exhibit constitutive photomorphogenic phenotype. protein_coding FUSCA 5 (FUS5) FUSCA 5 (FUS5);ARABIDOPSIS THALIANA COP9 SIGNALOSOME SUBUNIT 7 (ATCSN7);CONSTITUTIVE PHOTOMORPHOGENIC 15 (COP15);COP9 SIGNALOSOME SUBUNIT 7 (CSN7)	AT1G02090	13.1	13.4645	-0.0935191	-0.338539	0.738809	0.843155	encodes a phosphoprotein that is a subunit of the COP9 signalosome. Mutants exhibit constitutive photomorphogenic phenotype. protein_coding FUSCA 5 (FUS5) FUSCA 5 (FUS5);ARABIDOPSIS THALIANA COP9 SIGNALOSOME SUBUNIT 7 (ATCSN7);CONSTITUTIVE PHOTOMORPHOGENIC 15 (COP15);COP9 SIGNALOSOME SUBUNIT 7 (CSN7)	AT1G02090	20.8616	13.9466	0.568626	2.10736	0.0491278	0.0983866	encodes a phosphoprotein that is a subunit of the COP9 signalosome. Mutants exhibit constitutive photomorphogenic phenotype. protein_coding FUSCA 5 (FUS5) FUSCA 5 (FUS5);ARABIDOPSIS THALIANA COP9 SIGNALOSOME SUBUNIT 7 (ATCSN7);CONSTITUTIVE PHOTOMORPHOGENIC 15 (COP15);COP9 SIGNALOSOME SUBUNIT 7 (CSN7)
AT1G02100	53.3506	50.342	0.0869104	0.601723	0.554738	0.660823	Leucine carboxyl methyltransferase;(source:Araport11) protein_coding SUPPRESSOR OF BRI1 (SBI1) SUPPRESSOR OF BRI1 (SBI1);LEUCINE CARBOXYL METHYL TRANSFERASE 1 (LCMT1)	AT1G02100	37.6612	24.5253	0.616555	3.73118	0.00149227	0.0104609	Leucine carboxyl methyltransferase;(source:Araport11) protein_coding SUPPRESSOR OF BRI1 (SBI1) SUPPRESSOR OF BRI1 (SBI1);LEUCINE CARBOXYL METHYL TRANSFERASE 1 (LCMT1)	AT1G02100	46.3635	50.342	-0.118832	-0.811064	0.427749	0.605038	Leucine carboxyl methyltransferase;(source:Araport11) protein_coding SUPPRESSOR OF BRI1 (SBI1) SUPPRESSOR OF BRI1 (SBI1);LEUCINE CARBOXYL METHYL TRANSFERASE 1 (LCMT1)	AT1G02100	34.6067	24.5253	0.501986	3.01094	0.00740284	0.0207972	Leucine carboxyl methyltransferase;(source:Araport11) protein_coding SUPPRESSOR OF BRI1 (SBI1) SUPPRESSOR OF BRI1 (SBI1);LEUCINE CARBOXYL METHYL TRANSFERASE 1 (LCMT1)
AT1G02110	9.19369	14.0141	-0.606934	-2.8386	0.0107698	0.0306797	bZIP domain class transcription factor (DUF630 and DUF632);(source:Araport11) protein_coding	AT1G02110	13.4516	15.2383	-0.186896	-0.860049	0.400886	0.568926	bZIP domain class transcription factor (DUF630 and DUF632);(source:Araport11) protein_coding	AT1G02110	14.6503	14.0141	0.0530758	0.256631	0.800326	0.883467	bZIP domain class transcription factor (DUF630 and DUF632);(source:Araport11) protein_coding	AT1G02110	6.03375	15.2383	-1.2907	-4.89137	0.000112218	0.000662344	bZIP domain class transcription factor (DUF630 and DUF632);(source:Araport11) protein_coding
AT1G02120	65.2902	82.2729	-0.422498	-1.86574	0.0781861	0.14733	Encodes VAD1 (Vascular Associated Death1), a regulator of cell death and defense responses in vascular tissues. VAD1 is a putative membrane associated protein and contains a GRAM domain. vad1 is a lesion mimic mutant that exhibits light conditional appearance of propagative HR (hypersensitive response)-like lesions along the vascular system. The mRNA is cell-to-cell mobile. protein_coding VASCULA…	AT1G02120	118.345	58.5358	1.02253	4.41234	0.000324148	0.00339641	Encodes VAD1 (Vascular Associated Death1), a regulator of cell death and defense responses in vascular tissues. VAD1 is a putative membrane associated protein and contains a GRAM domain. vad1 is a lesion mimic mutant that exhibits light conditional appearance of propagative HR (hypersensitive response)-like lesions along the vascular system. The mRNA is cell-to-cell mobile. protein_coding VASCULA…	AT1G02120	47.8344	82.2729	-0.772297	-3.35975	0.00342544	0.0228745	Encodes VAD1 (Vascular Associated Death1), a regulator of cell death and defense responses in vascular tissues. VAD1 is a putative membrane associated protein and contains a GRAM domain. vad1 is a lesion mimic mutant that exhibits light conditional appearance of propagative HR (hypersensitive response)-like lesions along the vascular system. The mRNA is cell-to-cell mobile. protein_coding VASCULA…	AT1G02120	104.62	58.5358	0.841218	3.63577	0.00184839	0.00661787	Encodes VAD1 (Vascular Associated Death1), a regulator of cell death and defense responses in vascular tissues. VAD1 is a putative membrane associated protein and contains a GRAM domain. vad1 is a lesion mimic mutant that exhibits light conditional appearance of propagative HR (hypersensitive response)-like lesions along the vascular system. The mRNA is cell-to-cell mobile. protein_coding VASCULA…
AT1G02130	44.2686	28.2228	0.67104	3.49613	0.00252672	0.00968371	Belongs to the Rab1 GTPase subfamily. This small GTP-binding protein is required in ER to Golgi transportation. protein_coding RAS 5 (RA-5) ARABIDOPSIS THALIANA RESPONSIVE TO ABSCISIC ACID 1B (ATRAB1B);ARABIDOPSIS RAS 5 (ARA5);RAS 5 (RA-5);RAS 5 (ARA-5);ARABIDOPSIS THALIANA RAB D2A (ATRABD2A);RAB D2A (RABD2A)	AT1G02130	30.4197	25.6169	0.23741	1.14485	0.267022	0.432237	Belongs to the Rab1 GTPase subfamily. This small GTP-binding protein is required in ER to Golgi transportation. protein_coding RAS 5 (RA-5) ARABIDOPSIS THALIANA RESPONSIVE TO ABSCISIC ACID 1B (ATRAB1B);ARABIDOPSIS RAS 5 (ARA5);RAS 5 (RA-5);RAS 5 (ARA-5);ARABIDOPSIS THALIANA RAB D2A (ATRABD2A);RAB D2A (RABD2A)	AT1G02130	44.3331	28.2228	0.651384	3.35693	0.00344701	0.0229723	Belongs to the Rab1 GTPase subfamily. This small GTP-binding protein is required in ER to Golgi transportation. protein_coding RAS 5 (RA-5) ARABIDOPSIS THALIANA RESPONSIVE TO ABSCISIC ACID 1B (ATRAB1B);ARABIDOPSIS RAS 5 (ARA5);RAS 5 (RA-5);RAS 5 (ARA-5);ARABIDOPSIS THALIANA RAB D2A (ATRABD2A);RAB D2A (RABD2A)	AT1G02130	26.779	25.6169	0.0612892	0.290945	0.774364	0.843361	Belongs to the Rab1 GTPase subfamily. This small GTP-binding protein is required in ER to Golgi transportation. protein_coding RAS 5 (RA-5) ARABIDOPSIS THALIANA RESPONSIVE TO ABSCISIC ACID 1B (ATRAB1B);ARABIDOPSIS RAS 5 (ARA5);RAS 5 (RA-5);RAS 5 (ARA-5);ARABIDOPSIS THALIANA RAB D2A (ATRABD2A);RAB D2A (RABD2A)
AT1G02140	55.8721	32.4027	0.783804	5.41052	3.63731e-05	0.000319808	Encodes a homologue of the exon junction complex (EJC) component MAGO that participates in intron-mediated enhancement of gene expression. protein_coding MAGO NASHI (MAGO) MATERNAL EFFECT EMBRYO ARREST 63 (MEE63);MAGO NASHI (MAGO);HAPLESS 1 (HAP1)	AT1G02140	46.1534	35.3613	0.371437	2.49842	0.0222009	0.0748544	Encodes a homologue of the exon junction complex (EJC) component MAGO that participates in intron-mediated enhancement of gene expression. protein_coding MAGO NASHI (MAGO) MATERNAL EFFECT EMBRYO ARREST 63 (MEE63);MAGO NASHI (MAGO);HAPLESS 1 (HAP1)	AT1G02140	43.119	32.4027	0.41383	2.80856	0.0114912	0.0544266	Encodes a homologue of the exon junction complex (EJC) component MAGO that participates in intron-mediated enhancement of gene expression. protein_coding MAGO NASHI (MAGO) MATERNAL EFFECT EMBRYO ARREST 63 (MEE63);MAGO NASHI (MAGO);HAPLESS 1 (HAP1)	AT1G02140	47.8912	35.3613	0.428707	2.88724	0.00969327	0.0259043	Encodes a homologue of the exon junction complex (EJC) component MAGO that participates in intron-mediated enhancement of gene expression. protein_coding MAGO NASHI (MAGO) MATERNAL EFFECT EMBRYO ARREST 63 (MEE63);MAGO NASHI (MAGO);HAPLESS 1 (HAP1)
AT1G02145	16.6253	12.9642	0.352233	1.4594	0.161403	0.258352	homolog of asparagine-linked glycosylation 12;(source:Araport11) protein_coding HOMOLOG OF ASPARAGINE-LINKED GLYCOSYLATION 12 (ALG12) HOMOLOG OF ASPARAGINE-LINKED GLYCOSYLATION 12 (ALG12);EMS-MUTAGENIZED BRI1(BRASSINOSTEROID INSENSITIVE 1) SUPPRESSOR 4 (EBS4)	AT1G02145	15.1081	15.6305	-0.040757	-0.162203	0.872923	0.92413	homolog of asparagine-linked glycosylation 12;(source:Araport11) protein_coding HOMOLOG OF ASPARAGINE-LINKED GLYCOSYLATION 12 (ALG12) HOMOLOG OF ASPARAGINE-LINKED GLYCOSYLATION 12 (ALG12);EMS-MUTAGENIZED BRI1(BRASSINOSTEROID INSENSITIVE 1) SUPPRESSOR 4 (EBS4)	AT1G02145	20.7967	12.9642	0.720682	2.98757	0.007791	0.0414527	homolog of asparagine-linked glycosylation 12;(source:Araport11) protein_coding HOMOLOG OF ASPARAGINE-LINKED GLYCOSYLATION 12 (ALG12) HOMOLOG OF ASPARAGINE-LINKED GLYCOSYLATION 12 (ALG12);EMS-MUTAGENIZED BRI1(BRASSINOSTEROID INSENSITIVE 1) SUPPRESSOR 4 (EBS4)	AT1G02145	12.9865	15.6305	-0.27023	-1.04253	0.310739	0.427022	homolog of asparagine-linked glycosylation 12;(source:Araport11) protein_coding HOMOLOG OF ASPARAGINE-LINKED GLYCOSYLATION 12 (ALG12) HOMOLOG OF ASPARAGINE-LINKED GLYCOSYLATION 12 (ALG12);EMS-MUTAGENIZED BRI1(BRASSINOSTEROID INSENSITIVE 1) SUPPRESSOR 4 (EBS4)
AT1G02150	48.042	56.1858	-0.221737	-1.36355	0.189246	0.292719	Tetratricopeptide repeat (TPR)-like superfamily protein;(source:Araport11) protein_coding (CCR16) (CCR16)	AT1G02150	61.0978	97.6242	-0.648917	-4.03004	0.000762842	0.00637806	Tetratricopeptide repeat (TPR)-like superfamily protein;(source:Araport11) protein_coding (CCR16) (CCR16)	AT1G02150	55.6028	56.1858	-0.00795998	-0.0487331	0.96166	0.979491	Tetratricopeptide repeat (TPR)-like superfamily protein;(source:Araport11) protein_coding (CCR16) (CCR16)	AT1G02150	37.153	97.6242	-1.37542	-8.2465	1.40201e-07	4.00907e-06	Tetratricopeptide repeat (TPR)-like superfamily protein;(source:Araport11) protein_coding (CCR16) (CCR16)
AT1G02160	7.99722	9.13076	-0.194503	-0.86007	0.400875	0.522181	Cox19 family protein (CHCH motif);(source:Araport11) protein_coding	AT1G02160	4.66585	5.73853	-0.271667	-0.867368	0.396969	0.565032	Cox19 family protein (CHCH motif);(source:Araport11) protein_coding	AT1G02160	4.18596	9.13076	-1.16548	-4.2533	0.000462458	0.00528463	Cox19 family protein (CHCH motif);(source:Araport11) protein_coding	AT1G02160	4.91258	5.73853	-0.230717	-0.736026	0.471042	0.586835	Cox19 family protein (CHCH motif);(source:Araport11) protein_coding
AT1G02170	58.485	36.5875	0.59161	2.48937	0.0226243	0.0554161	Encodes a type I metacaspase. Two Arabidopsis metacaspases, AT1G02170 (MC1) and AT4G25110 (MC2) antagonistically control programmed cell death in Arabidopsis. MC1 is a positive regulator of cell death and requires conserved caspase-like putative catalytic residues for its function. MC2 negatively regulates cell death. This function is independent of the putative catalytic residues. A third type I…	AT1G02170	69.5089	27.6392	1.3406	5.32516	4.36901e-05	0.00078172	Encodes a type I metacaspase. Two Arabidopsis metacaspases, AT1G02170 (MC1) and AT4G25110 (MC2) antagonistically control programmed cell death in Arabidopsis. MC1 is a positive regulator of cell death and requires conserved caspase-like putative catalytic residues for its function. MC2 negatively regulates cell death. This function is independent of the putative catalytic residues. A third type I…	AT1G02170	45.9571	36.5875	0.336742	1.3973	0.179031	0.347322	Encodes a type I metacaspase. Two Arabidopsis metacaspases, AT1G02170 (MC1) and AT4G25110 (MC2) antagonistically control programmed cell death in Arabidopsis. MC1 is a positive regulator of cell death and requires conserved caspase-like putative catalytic residues for its function. MC2 negatively regulates cell death. This function is independent of the putative catalytic residues. A third type I…	AT1G02170	75.049	27.6392	1.44575	5.75312	1.75769e-05	0.000150441	Encodes a type I metacaspase. Two Arabidopsis metacaspases, AT1G02170 (MC1) and AT4G25110 (MC2) antagonistically control programmed cell death in Arabidopsis. MC1 is a positive regulator of cell death and requires conserved caspase-like putative catalytic residues for its function. MC2 negatively regulates cell death. This function is independent of the putative catalytic residues. A third type I…
AT1G02180	1.77461	0.75835	1.89448	2.45047	0.0245305	0.0588363	ferredoxin-like protein;(source:Araport11) protein_coding	AT1G02180	0.94104	2.71104	-1.81419	-2.81863	0.0112444	0.0459728	ferredoxin-like protein;(source:Araport11) protein_coding	AT1G02180	1.57174	0.75835	1.62717	2.02961	0.0571908	0.164037	ferredoxin-like protein;(source:Araport11) protein_coding	AT1G02180	0.24214	2.71104	-4.11198	-3.97227	0.000868459	0.00352012	ferredoxin-like protein;(source:Araport11) protein_coding
AT1G02205	44.4889	93.3634	-1.65096	-1.87609	0.0766821	0.145049	Expression of the CER1 gene associated with production of stem epicuticular wax and pollen fertility. Biochemical studies showed that cer1 mutants are blocked in the conversion of stem wax C30 aldehydes to C29 alkanes, and they also lack the secondary alcohols and ketones. These suggested the CER1 protein is an aldehyde decarbonylase, but the exact molecular function of this protein remains to be…	AT1G02205	49.2333	165.833	-2.30139	-2.54979	0.0199368	0.0694986	Expression of the CER1 gene associated with production of stem epicuticular wax and pollen fertility. Biochemical studies showed that cer1 mutants are blocked in the conversion of stem wax C30 aldehydes to C29 alkanes, and they also lack the secondary alcohols and ketones. These suggested the CER1 protein is an aldehyde decarbonylase, but the exact molecular function of this protein remains to be…	AT1G02205	125.691	93.3634	0.354954	0.417479	0.681184	0.803806	Expression of the CER1 gene associated with production of stem epicuticular wax and pollen fertility. Biochemical studies showed that cer1 mutants are blocked in the conversion of stem wax C30 aldehydes to C29 alkanes, and they also lack the secondary alcohols and ketones. These suggested the CER1 protein is an aldehyde decarbonylase, but the exact molecular function of this protein remains to be…	AT1G02205	3.86686	165.833	-5.57041	-3.23879	0.00448131	0.0137341	Expression of the CER1 gene associated with production of stem epicuticular wax and pollen fertility. Biochemical studies showed that cer1 mutants are blocked in the conversion of stem wax C30 aldehydes to C29 alkanes, and they also lack the secondary alcohols and ketones. These suggested the CER1 protein is an aldehyde decarbonylase, but the exact molecular function of this protein remains to be…
AT1G02220	1.82971	1.67842	0.265752	0.400279	0.693584	0.777932	NAC domain transcription factor which functions as a negative regulator of the TDIF-PXY module and fine-tunes TDIF signaling in vascular development. Controls the balance of xylem formation and cambial cell divisions. protein_coding NAC DOMAIN CONTAINING PROTEIN 3 (NAC003) NAC DOMAIN CONTAINING PROTEIN 3 (ANAC003); (XVP);NAC DOMAIN CONTAINING PROTEIN 3 (NAC003)	AT1G02220	3.04947	1.52135	0.953745	1.49468	0.152038	0.29338	NAC domain transcription factor which functions as a negative regulator of the TDIF-PXY module and fine-tunes TDIF signaling in vascular development. Controls the balance of xylem formation and cambial cell divisions. protein_coding NAC DOMAIN CONTAINING PROTEIN 3 (NAC003) NAC DOMAIN CONTAINING PROTEIN 3 (ANAC003); (XVP);NAC DOMAIN CONTAINING PROTEIN 3 (NAC003)	AT1G02220	2.49345	1.67842	0.929674	1.44772	0.164605	0.330288	NAC domain transcription factor which functions as a negative regulator of the TDIF-PXY module and fine-tunes TDIF signaling in vascular development. Controls the balance of xylem formation and cambial cell divisions. protein_coding NAC DOMAIN CONTAINING PROTEIN 3 (NAC003) NAC DOMAIN CONTAINING PROTEIN 3 (ANAC003); (XVP);NAC DOMAIN CONTAINING PROTEIN 3 (NAC003)	AT1G02220	3.14647	1.52135	0.933696	1.45586	0.162368	0.256984	NAC domain transcription factor which functions as a negative regulator of the TDIF-PXY module and fine-tunes TDIF signaling in vascular development. Controls the balance of xylem formation and cambial cell divisions. protein_coding NAC DOMAIN CONTAINING PROTEIN 3 (NAC003) NAC DOMAIN CONTAINING PROTEIN 3 (ANAC003); (XVP);NAC DOMAIN CONTAINING PROTEIN 3 (NAC003)
AT1G02230	0.183582	0.120002	-0.944592	-0.430182	0.672085	0.760339	NAC domain containing protein 4;(source:Araport11) protein_coding NAC DOMAIN CONTAINING PROTEIN 4 (NAC004) NAC DOMAIN CONTAINING PROTEIN 4 (NAC004);NAC DOMAIN CONTAINING PROTEIN 4 (ANAC004)	AT1G02230	2.8488	2.18483	0.616746	0.962489	0.348347	0.517891	NAC domain containing protein 4;(source:Araport11) protein_coding NAC DOMAIN CONTAINING PROTEIN 4 (NAC004) NAC DOMAIN CONTAINING PROTEIN 4 (NAC004);NAC DOMAIN CONTAINING PROTEIN 4 (ANAC004)	AT1G02230	0.546994	0.120002	2.88467	1.71086	0.104	0.244231	NAC domain containing protein 4;(source:Araport11) protein_coding NAC DOMAIN CONTAINING PROTEIN 4 (NAC004) NAC DOMAIN CONTAINING PROTEIN 4 (NAC004);NAC DOMAIN CONTAINING PROTEIN 4 (ANAC004)	AT1G02230	5.6339	2.18483	1.60203	2.72049	0.0138835	0.0348888	NAC domain containing protein 4;(source:Araport11) protein_coding NAC DOMAIN CONTAINING PROTEIN 4 (NAC004) NAC DOMAIN CONTAINING PROTEIN 4 (NAC004);NAC DOMAIN CONTAINING PROTEIN 4 (ANAC004)
AT1G02260	2.97179	5.13865	-0.619375	-1.56234	0.135331	0.225065	Divalent ion symporter;(source:Araport11) protein_coding	AT1G02260	8.29978	10.7409	-0.369277	-1.26944	0.220186	0.378501	Divalent ion symporter;(source:Araport11) protein_coding	AT1G02260	5.35219	5.13865	0.0892197	0.238606	0.814062	0.892018	Divalent ion symporter;(source:Araport11) protein_coding	AT1G02260	13.8883	10.7409	0.361001	1.35105	0.193143	0.294241	Divalent ion symporter;(source:Araport11) protein_coding
AT1G02270	88.8417	39.712	1.13957	5.13634	6.57202e-05	0.000514452	Calcium-binding endonuclease/exonuclease/phosphatase family;(source:Araport11) protein_coding	AT1G02270	60.0286	49.061	0.274676	1.23646	0.231917	0.391748	Calcium-binding endonuclease/exonuclease/phosphatase family;(source:Araport11) protein_coding	AT1G02270	72.9116	39.712	0.842888	3.79645	0.0012889	0.0112638	Calcium-binding endonuclease/exonuclease/phosphatase family;(source:Araport11) protein_coding	AT1G02270	63.5031	49.061	0.347903	1.56847	0.133896	0.219944	Calcium-binding endonuclease/exonuclease/phosphatase family;(source:Araport11) protein_coding
AT1G02280	16.3602	20.0753	-0.362914	-1.47433	0.157384	0.253257	Encodes a GTP-binding GTP-ase. Component of the chloroplast protein import machinery. Required for import of POR B into plastids. Toc33 phosphorylation may not play an important role in vivo. protein_coding TRANSLOCON AT THE OUTER ENVELOPE MEMBRANE OF CHLOROPLASTS 33 (TOC33) TRANSLOCON AT THE OUTER ENVELOPE MEMBRANE OF CHLOROPLASTS 33 (TOC33);PLASTID PROTEIN IMPORT 1 (PPI1); (ATTOC33)	AT1G02280	18.7691	26.2321	-0.440526	-1.76766	0.0937835	0.208239	Encodes a GTP-binding GTP-ase. Component of the chloroplast protein import machinery. Required for import of POR B into plastids. Toc33 phosphorylation may not play an important role in vivo. protein_coding TRANSLOCON AT THE OUTER ENVELOPE MEMBRANE OF CHLOROPLASTS 33 (TOC33) TRANSLOCON AT THE OUTER ENVELOPE MEMBRANE OF CHLOROPLASTS 33 (TOC33);PLASTID PROTEIN IMPORT 1 (PPI1); (ATTOC33)	AT1G02280	21.2217	20.0753	0.0541461	0.221014	0.827528	0.899958	Encodes a GTP-binding GTP-ase. Component of the chloroplast protein import machinery. Required for import of POR B into plastids. Toc33 phosphorylation may not play an important role in vivo. protein_coding TRANSLOCON AT THE OUTER ENVELOPE MEMBRANE OF CHLOROPLASTS 33 (TOC33) TRANSLOCON AT THE OUTER ENVELOPE MEMBRANE OF CHLOROPLASTS 33 (TOC33);PLASTID PROTEIN IMPORT 1 (PPI1); (ATTOC33)	AT1G02280	6.39067	26.2321	-1.99536	-6.12446	8.12255e-06	8.1998e-05	Encodes a GTP-binding GTP-ase. Component of the chloroplast protein import machinery. Required for import of POR B into plastids. Toc33 phosphorylation may not play an important role in vivo. protein_coding TRANSLOCON AT THE OUTER ENVELOPE MEMBRANE OF CHLOROPLASTS 33 (TOC33) TRANSLOCON AT THE OUTER ENVELOPE MEMBRANE OF CHLOROPLASTS 33 (TOC33);PLASTID PROTEIN IMPORT 1 (PPI1); (ATTOC33)
AT1G02290	12.581	8.8712	0.561274	2.11106	0.0487715	0.102	hypothetical protein;(source:Araport11) protein_coding (NFRKB3) (NFRKB3)	AT1G02290	5.8936	7.4538	-0.329029	-0.956351	0.351356	0.520438	hypothetical protein;(source:Araport11) protein_coding (NFRKB3) (NFRKB3)	AT1G02290	11.8002	8.8712	0.470396	1.70623	0.104874	0.245574	hypothetical protein;(source:Araport11) protein_coding (NFRKB3) (NFRKB3)	AT1G02290	6.66276	7.4538	-0.199472	-0.591328	0.561533	0.669555	hypothetical protein;(source:Araport11) protein_coding (NFRKB3) (NFRKB3)
AT1G02300	27.5912	46.107	-0.727407	-4.45693	0.000293476	0.00173382	Encodes a capase involved in stress induced cell death. protein_coding (ATCATHB1) (ATCATHB1)	AT1G02300	32.8851	26.9756	0.29329	1.63604	0.118909	0.246382	Encodes a capase involved in stress induced cell death. protein_coding (ATCATHB1) (ATCATHB1)	AT1G02300	31.1772	46.107	-0.563463	-3.40916	0.00306829	0.0211848	Encodes a capase involved in stress induced cell death. protein_coding (ATCATHB1) (ATCATHB1)	AT1G02300	17.8231	26.9756	-0.586375	-3.01716	0.00730273	0.0205754	Encodes a capase involved in stress induced cell death. protein_coding (ATCATHB1) (ATCATHB1)
AT1G02305	49.0809	156.94	-1.69818	-9.96216	8.0456e-09	4.51202e-07	Encodes a capase involved in stress induced cell death. protein_coding (ATCATHB2) (ATCATHB2)	AT1G02305	66.4195	54.3622	0.296769	1.68606	0.108753	0.231439	Encodes a capase involved in stress induced cell death. protein_coding (ATCATHB2) (ATCATHB2)	AT1G02305	76.5468	156.94	-1.05889	-6.22534	6.6061e-06	0.0002048	Encodes a capase involved in stress induced cell death. protein_coding (ATCATHB2) (ATCATHB2)	AT1G02305	45.0376	54.3622	-0.280619	-1.5614	0.135552	0.222199	Encodes a capase involved in stress induced cell death. protein_coding (ATCATHB2) (ATCATHB2)
AT1G02330	19.1793	31.2901	-0.697403	-3.13701	0.00561202	0.0182853	Encodes a nuclear coiled-coil domain-containing protein that interacts with and negatively regulates COP1's E3 ubiquitin ligase activity, and represses COP1 mediated HY5 degradation in cell-free extracts. protein_coding COP1 SUPPRESSOR 2 (CSU2) COP1 SUPPRESSOR 2 (CSU2)	AT1G02330	47.5454	20.9773	1.16276	5.03534	8.18847e-05	0.00125071	Encodes a nuclear coiled-coil domain-containing protein that interacts with and negatively regulates COP1's E3 ubiquitin ligase activity, and represses COP1 mediated HY5 degradation in cell-free extracts. protein_coding COP1 SUPPRESSOR 2 (CSU2) COP1 SUPPRESSOR 2 (CSU2)	AT1G02330	14.088	31.2901	-1.11704	-4.64446	0.000193467	0.00279374	Encodes a nuclear coiled-coil domain-containing protein that interacts with and negatively regulates COP1's E3 ubiquitin ligase activity, and represses COP1 mediated HY5 degradation in cell-free extracts. protein_coding COP1 SUPPRESSOR 2 (CSU2) COP1 SUPPRESSOR 2 (CSU2)	AT1G02330	30.4119	20.9773	0.535738	2.24632	0.0372479	0.0785383	Encodes a nuclear coiled-coil domain-containing protein that interacts with and negatively regulates COP1's E3 ubiquitin ligase activity, and represses COP1 mediated HY5 degradation in cell-free extracts. protein_coding COP1 SUPPRESSOR 2 (CSU2) COP1 SUPPRESSOR 2 (CSU2)
AT1G02335	5.6904	2.69119	0.80368	1.08129	0.293607	0.412596	Encodes a plasodesmata-located protein involved in regulating primary root growth by controlling phloem-mediated allocation of resources between the primary and lateral root meristems. protein_coding GERMIN-LIKE PROTEIN SUBFAMILY 2 MEMBER 2 PRECURSOR (GL22) GERMIN-LIKE PROTEIN SUBFAMILY 2 MEMBER 2 PRECURSOR (GL22);PLASMODESMAL GERMIN-LIKE PROTEIN 2 (PDGLP2)	AT1G02335	2.10356	3.88754	-1.55359	-1.57462	0.13247	0.266238	Encodes a plasodesmata-located protein involved in regulating primary root growth by controlling phloem-mediated allocation of resources between the primary and lateral root meristems. protein_coding GERMIN-LIKE PROTEIN SUBFAMILY 2 MEMBER 2 PRECURSOR (GL22) GERMIN-LIKE PROTEIN SUBFAMILY 2 MEMBER 2 PRECURSOR (GL22);PLASMODESMAL GERMIN-LIKE PROTEIN 2 (PDGLP2)	AT1G02335	4.05597	2.69119	0.388495	0.48933	0.63042	0.767184	Encodes a plasodesmata-located protein involved in regulating primary root growth by controlling phloem-mediated allocation of resources between the primary and lateral root meristems. protein_coding GERMIN-LIKE PROTEIN SUBFAMILY 2 MEMBER 2 PRECURSOR (GL22) GERMIN-LIKE PROTEIN SUBFAMILY 2 MEMBER 2 PRECURSOR (GL22);PLASMODESMAL GERMIN-LIKE PROTEIN 2 (PDGLP2)	AT1G02335	1.68285	3.88754	-1.89918	-1.71524	0.10318	0.179103	Encodes a plasodesmata-located protein involved in regulating primary root growth by controlling phloem-mediated allocation of resources between the primary and lateral root meristems. protein_coding GERMIN-LIKE PROTEIN SUBFAMILY 2 MEMBER 2 PRECURSOR (GL22) GERMIN-LIKE PROTEIN SUBFAMILY 2 MEMBER 2 PRECURSOR (GL22);PLASMODESMAL GERMIN-LIKE PROTEIN 2 (PDGLP2)
AT1G02340	17.2169	28.5658	-0.945806	-2.41356	0.0264786	0.0624392	Encodes a light-inducible, nuclear bHLH protein involved in phytochrome signaling. Mutants exhibit a long-hypocotyl phenotype only under far-red light but not under red light and are defective in other phytochrome A-related responses. Mutants also show blue light response defects. HFR1 interacts with COP1, co-localizes to the nuclear specks and is ubiquinated by COP1. protein_coding LONG HYPOCOTY…	AT1G02340	11.1495	1.03074	3.30918	2.58642	0.0184573	0.0656365	Encodes a light-inducible, nuclear bHLH protein involved in phytochrome signaling. Mutants exhibit a long-hypocotyl phenotype only under far-red light but not under red light and are defective in other phytochrome A-related responses. Mutants also show blue light response defects. HFR1 interacts with COP1, co-localizes to the nuclear specks and is ubiquinated by COP1. protein_coding LONG HYPOCOTY…	AT1G02340	36.2487	28.5658	0.354886	0.963034	0.348081	0.53012	Encodes a light-inducible, nuclear bHLH protein involved in phytochrome signaling. Mutants exhibit a long-hypocotyl phenotype only under far-red light but not under red light and are defective in other phytochrome A-related responses. Mutants also show blue light response defects. HFR1 interacts with COP1, co-localizes to the nuclear specks and is ubiquinated by COP1. protein_coding LONG HYPOCOTY…	AT1G02340	0.174891	1.03074	-3.47249	-1.19992	0.24547	0.356497	Encodes a light-inducible, nuclear bHLH protein involved in phytochrome signaling. Mutants exhibit a long-hypocotyl phenotype only under far-red light but not under red light and are defective in other phytochrome A-related responses. Mutants also show blue light response defects. HFR1 interacts with COP1, co-localizes to the nuclear specks and is ubiquinated by COP1. protein_coding LONG HYPOCOTY…
AT1G02350	0.25805	2.15257	-3.44751	-3.25013	0.00437006	0.0149736	protoporphyrinogen oxidase-like protein;(source:Araport11) protein_coding	AT1G02350	0.520592	0.548107	-1.63965	-1.15514	0.262892	0.427293	protoporphyrinogen oxidase-like protein;(source:Araport11) protein_coding	AT1G02350	0.917046	2.15257	-1.53777	-2.03791	0.0562764	0.162267	protoporphyrinogen oxidase-like protein;(source:Araport11) protein_coding	AT1G02350	0.113962	0.548107	-3.22742	-1.81638	0.0857256	0.154198	protoporphyrinogen oxidase-like protein;(source:Araport11) protein_coding
AT1G02360	7.93135	5.9857	0.394365	1.13664	0.27035	0.386682	Chitinase family protein;(source:Araport11) protein_coding	AT1G02360	10.7999	4.61889	1.25136	3.01077	0.00740566	0.0338258	Chitinase family protein;(source:Araport11) protein_coding	AT1G02360	7.46782	5.9857	0.332167	0.919509	0.369789	0.551104	Chitinase family protein;(source:Araport11) protein_coding	AT1G02360	26.088	4.61889	2.61922	6.69043	2.59278e-06	3.33406e-05	Chitinase family protein;(source:Araport11) protein_coding
AT1G02370	4.84268	2.49575	0.915195	1.78948	0.0900961	0.164461	Tetratricopeptide repeat (TPR)-like superfamily protein;(source:Araport11) protein_coding	AT1G02370	4.82161	3.07095	0.70197	1.36175	0.189803	0.342473	Tetratricopeptide repeat (TPR)-like superfamily protein;(source:Araport11) protein_coding	AT1G02370	1.84146	2.49575	-0.646125	-0.949762	0.354605	0.536096	Tetratricopeptide repeat (TPR)-like superfamily protein;(source:Araport11) protein_coding	AT1G02370	7.19088	3.07095	1.23615	2.51443	0.0214703	0.0498718	Tetratricopeptide repeat (TPR)-like superfamily protein;(source:Araport11) protein_coding
AT1G02380	12.3088	5.63496	1.15235	3.22733	0.00459658	0.0156123	transmembrane protein;(source:Araport11) protein_coding	AT1G02380	4.25244	2.95026	0.244932	0.428046	0.673612	0.791611	transmembrane protein;(source:Araport11) protein_coding	AT1G02380	10.1788	5.63496	0.782838	2.09497	0.0503391	0.150475	transmembrane protein;(source:Araport11) protein_coding	AT1G02380	1.90836	2.95026	-0.691319	-0.991036	0.334588	0.451825	transmembrane protein;(source:Araport11) protein_coding
AT1G02390	3.50115	10.39	-1.72455	-3.48191	0.00260832	0.0099558	putative sn-glycerol-3-phosphate 2-O-acyltransferase protein_coding GLYCEROL-3-PHOSPHATE SN-2-ACYLTRANSFERASE 2 (GPAT2) GLYCEROL-3-PHOSPHATE SN-2-ACYLTRANSFERASE 2 (ATGPAT2);GLYCEROL-3-PHOSPHATE SN-2-ACYLTRANSFERASE 2 (GPAT2)	AT1G02390	10.1761	7.71548	0.400712	0.877896	0.391378	0.559797	putative sn-glycerol-3-phosphate 2-O-acyltransferase protein_coding GLYCEROL-3-PHOSPHATE SN-2-ACYLTRANSFERASE 2 (GPAT2) GLYCEROL-3-PHOSPHATE SN-2-ACYLTRANSFERASE 2 (ATGPAT2);GLYCEROL-3-PHOSPHATE SN-2-ACYLTRANSFERASE 2 (GPAT2)	AT1G02390	13.371	10.39	0.306401	0.787174	0.441254	0.616253	putative sn-glycerol-3-phosphate 2-O-acyltransferase protein_coding GLYCEROL-3-PHOSPHATE SN-2-ACYLTRANSFERASE 2 (GPAT2) GLYCEROL-3-PHOSPHATE SN-2-ACYLTRANSFERASE 2 (ATGPAT2);GLYCEROL-3-PHOSPHATE SN-2-ACYLTRANSFERASE 2 (GPAT2)	AT1G02390	11.7979	7.71548	0.557356	1.23745	0.231558	0.340745	putative sn-glycerol-3-phosphate 2-O-acyltransferase protein_coding GLYCEROL-3-PHOSPHATE SN-2-ACYLTRANSFERASE 2 (GPAT2) GLYCEROL-3-PHOSPHATE SN-2-ACYLTRANSFERASE 2 (ATGPAT2);GLYCEROL-3-PHOSPHATE SN-2-ACYLTRANSFERASE 2 (GPAT2)
AT1G02400	20.3475	11.3494	0.898902	1.9632	0.0649996	0.127802	Encodes a gibberellin 2-oxidase that acts on C19 gibberellins but not C20 gibberellins. protein_coding GIBBERELLIN 2-OXIDASE 6 (GA2OX6) ARABIDOPSIS THALIANA GIBBERELLIN 2-OXIDASE 6 (ATGA2OX6);DOWNSTREAM TARGET OF AGL15 1 (DTA1);ARABIDOPSIS THALIANA GIBBERELLIN 2-OXIDASE 4 (ATGA2OX4);GIBBERELLIN 2-OXIDASE 6 (GA2OX6)	AT1G02400	2.07498	0.719709	0.949218	0.581618	0.567918	0.709785	Encodes a gibberellin 2-oxidase that acts on C19 gibberellins but not C20 gibberellins. protein_coding GIBBERELLIN 2-OXIDASE 6 (GA2OX6) ARABIDOPSIS THALIANA GIBBERELLIN 2-OXIDASE 6 (ATGA2OX6);DOWNSTREAM TARGET OF AGL15 1 (DTA1);ARABIDOPSIS THALIANA GIBBERELLIN 2-OXIDASE 4 (ATGA2OX4);GIBBERELLIN 2-OXIDASE 6 (GA2OX6)	AT1G02400	11.7268	11.3494	0.286653	0.581767	0.56782	0.720104	Encodes a gibberellin 2-oxidase that acts on C19 gibberellins but not C20 gibberellins. protein_coding GIBBERELLIN 2-OXIDASE 6 (GA2OX6) ARABIDOPSIS THALIANA GIBBERELLIN 2-OXIDASE 6 (ATGA2OX6);DOWNSTREAM TARGET OF AGL15 1 (DTA1);ARABIDOPSIS THALIANA GIBBERELLIN 2-OXIDASE 4 (ATGA2OX4);GIBBERELLIN 2-OXIDASE 6 (GA2OX6)	AT1G02400	2.86554	0.719709	1.95823	1.30073	0.209488	0.314274	Encodes a gibberellin 2-oxidase that acts on C19 gibberellins but not C20 gibberellins. protein_coding GIBBERELLIN 2-OXIDASE 6 (GA2OX6) ARABIDOPSIS THALIANA GIBBERELLIN 2-OXIDASE 6 (ATGA2OX6);DOWNSTREAM TARGET OF AGL15 1 (DTA1);ARABIDOPSIS THALIANA GIBBERELLIN 2-OXIDASE 4 (ATGA2OX4);GIBBERELLIN 2-OXIDASE 6 (GA2OX6)
AT1G02405	1.07267	0.151983	3.58651	2.33642	0.031024	0.0708715	proline-rich family protein;(source:Araport11) protein_coding	AT1G02405	1.66806	0.363449	2.28091	2.01508	0.058823	0.150674	proline-rich family protein;(source:Araport11) protein_coding	AT1G02405	1.28678	0.151983	3.69361	2.39801	0.0273414	0.0996292	proline-rich family protein;(source:Araport11) protein_coding	AT1G02405	0.629171	0.363449	1.14413	0.919104	0.369995	0.48855	proline-rich family protein;(source:Araport11) protein_coding
AT1G02410	14.0338	8.98472	0.669735	3.17737	0.00513365	0.0170399	Encodes a member of the cytochrome c oxidase 11 protein family. It is an integral mitochondrial protein and likely plays an important role as a mitochondrial chaperone in COX complex assembly, affecting plant growth and pollen germination. protein_coding CYTOCHROME C OXIDASE 11 (COX11) CYTOCHROME C OXIDASE 11 (COX11)	AT1G02410	18.7557	12.107	0.593372	2.94366	0.00857441	0.0377431	Encodes a member of the cytochrome c oxidase 11 protein family. It is an integral mitochondrial protein and likely plays an important role as a mitochondrial chaperone in COX complex assembly, affecting plant growth and pollen germination. protein_coding CYTOCHROME C OXIDASE 11 (COX11) CYTOCHROME C OXIDASE 11 (COX11)	AT1G02410	14.9053	8.98472	0.762769	3.55598	0.00221012	0.01679	Encodes a member of the cytochrome c oxidase 11 protein family. It is an integral mitochondrial protein and likely plays an important role as a mitochondrial chaperone in COX complex assembly, affecting plant growth and pollen germination. protein_coding CYTOCHROME C OXIDASE 11 (COX11) CYTOCHROME C OXIDASE 11 (COX11)	AT1G02410	14.5718	12.107	0.268584	1.28497	0.214826	0.320821	Encodes a member of the cytochrome c oxidase 11 protein family. It is an integral mitochondrial protein and likely plays an important role as a mitochondrial chaperone in COX complex assembly, affecting plant growth and pollen germination. protein_coding CYTOCHROME C OXIDASE 11 (COX11) CYTOCHROME C OXIDASE 11 (COX11)
AT1G02420	3.45623	9.93363	-1.52004	-6.13492	7.94992e-06	9.48287e-05	Pentatricopeptide repeat (PPR) superfamily protein;(source:Araport11) protein_coding	AT1G02420	8.74823	6.93034	0.314236	1.29555	0.21123	0.368134	Pentatricopeptide repeat (PPR) superfamily protein;(source:Araport11) protein_coding	AT1G02420	4.11971	9.93363	-1.24589	-4.97505	9.3413e-05	0.00161598	Pentatricopeptide repeat (PPR) superfamily protein;(source:Araport11) protein_coding	AT1G02420	6.77244	6.93034	-0.0441295	-0.171925	0.865383	0.909187	Pentatricopeptide repeat (PPR) superfamily protein;(source:Araport11) protein_coding
AT1G02440	0.14739	0.148316	0.637462	0.310677	0.759556	0.829976	A member of ARF GTPase family. A thaliana has 21 members of this family, known to be essential for vesicle coating and uncoating and functions in GTP-binding. Gene encoding ADP-ribosylation factor and similar to other ARFs and ARF-like proteins. protein_coding ADP-RIBOSYLATION FACTOR D1A (ARFD1A) ADP-RIBOSYLATION FACTOR D1A (ATARFD1A);ADP-RIBOSYLATION FACTOR 4 (ARL4);ADP-RIBOSYLATION FACTOR D1A (…	AT1G02440	0.671668	0.1829	3.2066	1.83408	0.0829522	0.191924	A member of ARF GTPase family. A thaliana has 21 members of this family, known to be essential for vesicle coating and uncoating and functions in GTP-binding. Gene encoding ADP-ribosylation factor and similar to other ARFs and ARF-like proteins. protein_coding ADP-RIBOSYLATION FACTOR D1A (ARFD1A) ADP-RIBOSYLATION FACTOR D1A (ATARFD1A);ADP-RIBOSYLATION FACTOR 4 (ARL4);ADP-RIBOSYLATION FACTOR D1A (…	AT1G02440	0.232053	0.148316	1.39349	0.693045	0.496981	0.664209	A member of ARF GTPase family. A thaliana has 21 members of this family, known to be essential for vesicle coating and uncoating and functions in GTP-binding. Gene encoding ADP-ribosylation factor and similar to other ARFs and ARF-like proteins. protein_coding ADP-RIBOSYLATION FACTOR D1A (ARFD1A) ADP-RIBOSYLATION FACTOR D1A (ATARFD1A);ADP-RIBOSYLATION FACTOR 4 (ARL4);ADP-RIBOSYLATION FACTOR D1A (…	AT1G02440	1.22605	0.1829	4.35799	2.59963	0.0179501	0.0430523	A member of ARF GTPase family. A thaliana has 21 members of this family, known to be essential for vesicle coating and uncoating and functions in GTP-binding. Gene encoding ADP-ribosylation factor and similar to other ARFs and ARF-like proteins. protein_coding ADP-RIBOSYLATION FACTOR D1A (ARFD1A) ADP-RIBOSYLATION FACTOR D1A (ATARFD1A);ADP-RIBOSYLATION FACTOR 4 (ARL4);ADP-RIBOSYLATION FACTOR D1A (…
AT1G02450	0.658512	1.39204	-1.22194	-1.18611	0.250745	0.364479	NIMIN1 modulates PR gene expression according the following model: NPR1 forms a ternary complex with NIMIN1 and TGA factors upon SAR induction that binds to a positive regulatory cis-element of the PR-1 promoter, termed LS7. This leads to PR-1 gene induction. NIMIN1 decreases transcriptional activation, possibly through its EAR motif, which results in fine-tuning of PR-1 gene expression. protein_…	AT1G02450	7.28167	8.5319	-0.427249	-1.1025	0.284531	0.451973	NIMIN1 modulates PR gene expression according the following model: NPR1 forms a ternary complex with NIMIN1 and TGA factors upon SAR induction that binds to a positive regulatory cis-element of the PR-1 promoter, termed LS7. This leads to PR-1 gene induction. NIMIN1 decreases transcriptional activation, possibly through its EAR motif, which results in fine-tuning of PR-1 gene expression. protein_…	AT1G02450	0.934029	1.39204	-0.445032	-0.470185	0.643776	0.775794	NIMIN1 modulates PR gene expression according the following model: NPR1 forms a ternary complex with NIMIN1 and TGA factors upon SAR induction that binds to a positive regulatory cis-element of the PR-1 promoter, termed LS7. This leads to PR-1 gene induction. NIMIN1 decreases transcriptional activation, possibly through its EAR motif, which results in fine-tuning of PR-1 gene expression. protein_…	AT1G02450	73.8946	8.5319	3.14097	10.0658	6.84482e-09	4.90565e-07	NIMIN1 modulates PR gene expression according the following model: NPR1 forms a ternary complex with NIMIN1 and TGA factors upon SAR induction that binds to a positive regulatory cis-element of the PR-1 promoter, termed LS7. This leads to PR-1 gene induction. NIMIN1 decreases transcriptional activation, possibly through its EAR motif, which results in fine-tuning of PR-1 gene expression. protein_…
AT1G02460	14.8157	6.14207	1.18832	2.61324	0.017441	0.0450561	Pectin lyase-like superfamily protein;(source:Araport11) protein_coding	AT1G02460	5.51032	4.45837	0.603163	0.930917	0.364012	0.533173	Pectin lyase-like superfamily protein;(source:Araport11) protein_coding	AT1G02460	8.74152	6.14207	0.570837	1.16603	0.25857	0.438722	Pectin lyase-like superfamily protein;(source:Araport11) protein_coding	AT1G02460	14.223	4.45837	2.00052	3.44273	0.00284689	0.00939148	Pectin lyase-like superfamily protein;(source:Araport11) protein_coding
AT1G02470	0.4656	1.30211	-1.89278	-2.14278	0.0458089	0.0966654	Polyketide cyclase/dehydrase and lipid transport superfamily protein;(source:Araport11) protein_coding	AT1G02470	0.68113	0.805924	-0.663196	-0.693673	0.496597	0.652098	Polyketide cyclase/dehydrase and lipid transport superfamily protein;(source:Araport11) protein_coding	AT1G02470	2.67563	1.30211	1.06042	1.77791	0.0920347	0.224757	Polyketide cyclase/dehydrase and lipid transport superfamily protein;(source:Araport11) protein_coding	AT1G02470	1.92737	0.805924	1.06733	1.36667	0.188282	0.288308	Polyketide cyclase/dehydrase and lipid transport superfamily protein;(source:Araport11) protein_coding
AT1G02475	26.6745	21.9712	0.262811	1.30236	0.208944	0.316515	Polyketide cyclase/dehydrase and lipid transport superfamily protein;(source:Araport11) protein_coding	AT1G02475	14.2202	23.0611	-0.730992	-3.13883	0.00558947	0.0275615	Polyketide cyclase/dehydrase and lipid transport superfamily protein;(source:Araport11) protein_coding	AT1G02475	35.1171	21.9712	0.677267	3.36144	0.00341256	0.0228399	Polyketide cyclase/dehydrase and lipid transport superfamily protein;(source:Araport11) protein_coding	AT1G02475	22.2981	23.0611	-0.0622014	-0.287229	0.777163	0.845638	Polyketide cyclase/dehydrase and lipid transport superfamily protein;(source:Araport11) protein_coding
AT1G02500	224.281	209.9	0.0848015	0.541247	0.594864	0.695396	encodes a S-adenosylmethionine synthetase. SAM1 is regulated by protein S-nitrosylation. The covalent binding of nitric oxide (NO) to the Cys114 residue inhibits the enzyme activity. protein_coding S-ADENOSYLMETHIONINE SYNTHETASE 1 (SAM1) (METK1); (AtSAM1);S-ADENOSYLMETHIONINE SYNTHETASE-1 (SAM-1);S-ADENOSYLMETHIONINE SYNTHETASE 1 (SAM1); (MAT1)	AT1G02500	164.089	164.519	0.00987847	0.065051	0.948839	0.968932	encodes a S-adenosylmethionine synthetase. SAM1 is regulated by protein S-nitrosylation. The covalent binding of nitric oxide (NO) to the Cys114 residue inhibits the enzyme activity. protein_coding S-ADENOSYLMETHIONINE SYNTHETASE 1 (SAM1) (METK1); (AtSAM1);S-ADENOSYLMETHIONINE SYNTHETASE-1 (SAM-1);S-ADENOSYLMETHIONINE SYNTHETASE 1 (SAM1); (MAT1)	AT1G02500	287.85	209.9	0.460476	2.93708	0.00869821	0.0448076	encodes a S-adenosylmethionine synthetase. SAM1 is regulated by protein S-nitrosylation. The covalent binding of nitric oxide (NO) to the Cys114 residue inhibits the enzyme activity. protein_coding S-ADENOSYLMETHIONINE SYNTHETASE 1 (SAM1) (METK1); (AtSAM1);S-ADENOSYLMETHIONINE SYNTHETASE-1 (SAM-1);S-ADENOSYLMETHIONINE SYNTHETASE 1 (SAM1); (MAT1)	AT1G02500	320.151	164.519	0.970747	6.26147	6.13689e-06	6.5657e-05	encodes a S-adenosylmethionine synthetase. SAM1 is regulated by protein S-nitrosylation. The covalent binding of nitric oxide (NO) to the Cys114 residue inhibits the enzyme activity. protein_coding S-ADENOSYLMETHIONINE SYNTHETASE 1 (SAM1) (METK1); (AtSAM1);S-ADENOSYLMETHIONINE SYNTHETASE-1 (SAM-1);S-ADENOSYLMETHIONINE SYNTHETASE 1 (SAM1); (MAT1)
AT1G02520	0.5743	1.53407	-1.18181	-1.0559	0.304751	0.424248	Encodes an ATP-binding cassette (ABC) transporter. Expressed in the vascular tissue of primary stem. The mRNA is cell-to-cell mobile. protein_coding ATP-BINDING CASSETTE B11 (ABCB11) P-GLYCOPROTEIN 11 (PGP11);ATP-BINDING CASSETTE B11 (ABCB11);MULTI-DRUG RESISTANCE 8 (MDR8)	AT1G02520	0.581031	0.116346	2.04128	1.04893	0.307865	0.476862	Encodes an ATP-binding cassette (ABC) transporter. Expressed in the vascular tissue of primary stem. The mRNA is cell-to-cell mobile. protein_coding ATP-BINDING CASSETTE B11 (ABCB11) P-GLYCOPROTEIN 11 (PGP11);ATP-BINDING CASSETTE B11 (ABCB11);MULTI-DRUG RESISTANCE 8 (MDR8)	AT1G02520	0.747111	1.53407	-0.439764	-0.412743	0.684589	0.806558	Encodes an ATP-binding cassette (ABC) transporter. Expressed in the vascular tissue of primary stem. The mRNA is cell-to-cell mobile. protein_coding ATP-BINDING CASSETTE B11 (ABCB11) P-GLYCOPROTEIN 11 (PGP11);ATP-BINDING CASSETTE B11 (ABCB11);MULTI-DRUG RESISTANCE 8 (MDR8)	AT1G02520	2.19174	0.116346	4.08529	2.29732	0.0335961	0.0721336	Encodes an ATP-binding cassette (ABC) transporter. Expressed in the vascular tissue of primary stem. The mRNA is cell-to-cell mobile. protein_coding ATP-BINDING CASSETTE B11 (ABCB11) P-GLYCOPROTEIN 11 (PGP11);ATP-BINDING CASSETTE B11 (ABCB11);MULTI-DRUG RESISTANCE 8 (MDR8)
AT1G02560	98.0687	158.477	-0.67986	-3.49792	0.00251666	0.00966262	One of several nuclear-encoded ClpPs (caseinolytic protease). Contains a highly conserved catalytic triad of Ser-type proteases (Ser-His-Asp). The name reflects nomenclature described in Adam et. al (2001). The mRNA is cell-to-cell mobile. protein_coding NUCLEAR ENCODED CLP PROTEASE 5 (CLPP5) NUCLEAR ENCODED CLP PROTEASE 5 (CLPP5);NUCLEAR-ENCODED CLPP 1 (NCLPP1);NUCLEAR CLPP 5 (NCLPP5)	AT1G02560	64.2838	133.551	-1.05504	-5.40959	3.64455e-05	0.000684984	One of several nuclear-encoded ClpPs (caseinolytic protease). Contains a highly conserved catalytic triad of Ser-type proteases (Ser-His-Asp). The name reflects nomenclature described in Adam et. al (2001). The mRNA is cell-to-cell mobile. protein_coding NUCLEAR ENCODED CLP PROTEASE 5 (CLPP5) NUCLEAR ENCODED CLP PROTEASE 5 (CLPP5);NUCLEAR-ENCODED CLPP 1 (NCLPP1);NUCLEAR CLPP 5 (NCLPP5)	AT1G02560	156.929	158.477	-0.0127603	-0.065242	0.948689	0.97306	One of several nuclear-encoded ClpPs (caseinolytic protease). Contains a highly conserved catalytic triad of Ser-type proteases (Ser-His-Asp). The name reflects nomenclature described in Adam et. al (2001). The mRNA is cell-to-cell mobile. protein_coding NUCLEAR ENCODED CLP PROTEASE 5 (CLPP5) NUCLEAR ENCODED CLP PROTEASE 5 (CLPP5);NUCLEAR-ENCODED CLPP 1 (NCLPP1);NUCLEAR CLPP 5 (NCLPP5)	AT1G02560	102.83	133.551	-0.385368	-1.99541	0.0611003	0.117393	One of several nuclear-encoded ClpPs (caseinolytic protease). Contains a highly conserved catalytic triad of Ser-type proteases (Ser-His-Asp). The name reflects nomenclature described in Adam et. al (2001). The mRNA is cell-to-cell mobile. protein_coding NUCLEAR ENCODED CLP PROTEASE 5 (CLPP5) NUCLEAR ENCODED CLP PROTEASE 5 (CLPP5);NUCLEAR-ENCODED CLPP 1 (NCLPP1);NUCLEAR CLPP 5 (NCLPP5)
AT1G02610	77.3851	62.9936	0.20952	0.983323	0.338268	0.45908	RING/FYVE/PHD zinc finger superfamily protein;(source:Araport11) protein_coding	AT1G02610	20.0251	3.58623	2.48797	5.32559	4.36501e-05	0.00078172	RING/FYVE/PHD zinc finger superfamily protein;(source:Araport11) protein_coding	AT1G02610	69.7282	62.9936	0.150487	0.704111	0.490225	0.658897	RING/FYVE/PHD zinc finger superfamily protein;(source:Araport11) protein_coding	AT1G02610	5.05619	3.58623	0.500226	0.929676	0.364638	0.482868	RING/FYVE/PHD zinc finger superfamily protein;(source:Araport11) protein_coding
AT1G02620	14.3427	11.8961	-0.0830563	-0.191081	0.850566	0.896822	Ras-related small GTP-binding family protein;(source:Araport11) protein_coding	AT1G02620	1.66342	0.232581	4.05098	1.62351	0.121575	0.250214	Ras-related small GTP-binding family protein;(source:Araport11) protein_coding	AT1G02620	9.52222	11.8961	-0.403279	-0.851324	0.405589	0.584699	Ras-related small GTP-binding family protein;(source:Araport11) protein_coding	AT1G02620	0.105249	0.232581	-1.38848	-0.383223	0.705969	0.789091	Ras-related small GTP-binding family protein;(source:Araport11) protein_coding
AT1G02640	7.40476	27.6619	-2.04757	-5.07406	7.52556e-05	0.000571705	encodes a protein similar to a beta-xylosidase located in the extracellular matrix. This is a member of glycosyl hydrolase family 3 and has six other closely related members. protein_coding BETA-XYLOSIDASE 2 (BXL2) BETA-XYLOSIDASE 2 (ATBXL2);BETA-XYLOSIDASE 2 (BXL2)	AT1G02640	3.07907	2.5165	0.022566	0.0240332	0.981086	0.98774	encodes a protein similar to a beta-xylosidase located in the extracellular matrix. This is a member of glycosyl hydrolase family 3 and has six other closely related members. protein_coding BETA-XYLOSIDASE 2 (BXL2) BETA-XYLOSIDASE 2 (ATBXL2);BETA-XYLOSIDASE 2 (BXL2)	AT1G02640	17.4584	27.6619	-0.991494	-2.73361	0.013499	0.0609937	encodes a protein similar to a beta-xylosidase located in the extracellular matrix. This is a member of glycosyl hydrolase family 3 and has six other closely related members. protein_coding BETA-XYLOSIDASE 2 (BXL2) BETA-XYLOSIDASE 2 (ATBXL2);BETA-XYLOSIDASE 2 (BXL2)	AT1G02640	1.11673	2.5165	-1.47028	-1.14817	0.265682	0.37926	encodes a protein similar to a beta-xylosidase located in the extracellular matrix. This is a member of glycosyl hydrolase family 3 and has six other closely related members. protein_coding BETA-XYLOSIDASE 2 (BXL2) BETA-XYLOSIDASE 2 (ATBXL2);BETA-XYLOSIDASE 2 (BXL2)
AT1G02650	3.06217	3.30932	-0.137129	-0.29256	0.773149	0.840147	Tetratricopeptide repeat (TPR)-like superfamily protein;(source:Araport11) protein_coding	AT1G02650	2.45018	0.608126	1.99468	2.13976	0.046084	0.126282	Tetratricopeptide repeat (TPR)-like superfamily protein;(source:Araport11) protein_coding	AT1G02650	4.71951	3.30932	0.587418	1.3058	0.207795	0.381164	Tetratricopeptide repeat (TPR)-like superfamily protein;(source:Araport11) protein_coding	AT1G02650	0.519101	0.608126	-1.60802	-1.14339	0.26761	0.381629	Tetratricopeptide repeat (TPR)-like superfamily protein;(source:Araport11) protein_coding
AT1G02660	36.8364	130.72	-1.87403	-8.54087	8.36886e-08	2.67846e-06	PLIP2 is a glycerolipid A1 lipase with substrate preference for monogalactosyldiacylglycerol. Expression is induced by ABA. protein_coding PLASTID LIPASE2 (PLIP2) PLASTID LIPASE2 (PLIP2)	AT1G02660	27.0506	13.8945	0.986242	3.34549	0.00353589	0.0196477	PLIP2 is a glycerolipid A1 lipase with substrate preference for monogalactosyldiacylglycerol. Expression is induced by ABA. protein_coding PLASTID LIPASE2 (PLIP2) PLASTID LIPASE2 (PLIP2)	AT1G02660	56.1998	130.72	-1.24502	-5.71302	1.91247e-05	0.000479699	PLIP2 is a glycerolipid A1 lipase with substrate preference for monogalactosyldiacylglycerol. Expression is induced by ABA. protein_coding PLASTID LIPASE2 (PLIP2) PLASTID LIPASE2 (PLIP2)	AT1G02660	19.6981	13.8945	0.560976	1.84047	0.0819704	0.148632	PLIP2 is a glycerolipid A1 lipase with substrate preference for monogalactosyldiacylglycerol. Expression is induced by ABA. protein_coding PLASTID LIPASE2 (PLIP2) PLASTID LIPASE2 (PLIP2)
AT1G02670	0.576185	0.180476	2.4412	1.70407	0.105284	0.1851	P-loop containing nucleoside triphosphate hydrolases superfamily protein;(source:Araport11) protein_coding	AT1G02670	0.181282	1.83293	-3.8934	-3.00353	0.00752393	0.0342174	P-loop containing nucleoside triphosphate hydrolases superfamily protein;(source:Araport11) protein_coding	AT1G02670	0.419235	0.180476	0.253297	0.148361	0.88368	0.935519	P-loop containing nucleoside triphosphate hydrolases superfamily protein;(source:Araport11) protein_coding	AT1G02670	2.90269	1.83293	0.646882	1.12954	0.273253	0.387735	P-loop containing nucleoside triphosphate hydrolases superfamily protein;(source:Araport11) protein_coding
AT1G02680	10.3082	8.52416	0.311705	1.22305	0.236822	0.348955	Encodes a TBP-Associated Factor (TAF) that functions together with PRC2 in transcriptional regulation during seed development. protein_coding TBP-ASSOCIATED FACTOR 13 (TAF13) TBP-ASSOCIATED FACTOR 13 (TAF13)	AT1G02680	5.82807	6.64774	-0.212509	-0.655756	0.520139	0.672621	Encodes a TBP-Associated Factor (TAF) that functions together with PRC2 in transcriptional regulation during seed development. protein_coding TBP-ASSOCIATED FACTOR 13 (TAF13) TBP-ASSOCIATED FACTOR 13 (TAF13)	AT1G02680	12.2495	8.52416	0.6042	2.35549	0.0298374	0.105765	Encodes a TBP-Associated Factor (TAF) that functions together with PRC2 in transcriptional regulation during seed development. protein_coding TBP-ASSOCIATED FACTOR 13 (TAF13) TBP-ASSOCIATED FACTOR 13 (TAF13)	AT1G02680	9.32586	6.64774	0.494972	1.65741	0.114476	0.194455	Encodes a TBP-Associated Factor (TAF) that functions together with PRC2 in transcriptional regulation during seed development. protein_coding TBP-ASSOCIATED FACTOR 13 (TAF13) TBP-ASSOCIATED FACTOR 13 (TAF13)
AT1G02690	1.89078	1.03113	0.89247	1.6032	0.126006	0.212827	Putative importin alpha isoform. When overexpressed can rescue the impa-4 decreased transformation susceptibility phenotype. protein_coding IMPORTIN ALPHA ISOFORM 6 (IMPA-6) IMPORTIN ALPHA ISOFORM 6 (IMPA-6)	AT1G02690	1.71543	2.80426	-0.871141	-1.8024	0.0879726	0.199366	Putative importin alpha isoform. When overexpressed can rescue the impa-4 decreased transformation susceptibility phenotype. protein_coding IMPORTIN ALPHA ISOFORM 6 (IMPA-6) IMPORTIN ALPHA ISOFORM 6 (IMPA-6)	AT1G02690	1.65411	1.03113	0.724458	1.22681	0.235439	0.413731	Putative importin alpha isoform. When overexpressed can rescue the impa-4 decreased transformation susceptibility phenotype. protein_coding IMPORTIN ALPHA ISOFORM 6 (IMPA-6) IMPORTIN ALPHA ISOFORM 6 (IMPA-6)	AT1G02690	2.20312	2.80426	-0.479691	-1.04624	0.309069	0.42529	Putative importin alpha isoform. When overexpressed can rescue the impa-4 decreased transformation susceptibility phenotype. protein_coding IMPORTIN ALPHA ISOFORM 6 (IMPA-6) IMPORTIN ALPHA ISOFORM 6 (IMPA-6)
AT1G02705	0.701055	0.352675	0.629617	0.503943	0.620312	0.71786	hypothetical protein;(source:Araport11) protein_coding	AT1G02705	1.77017	1.47562	-0.0392849	-0.051385	0.959575	0.97534	hypothetical protein;(source:Araport11) protein_coding	AT1G02705	2.61517	0.352675	2.98338	2.76396	0.0126485	0.0581565	hypothetical protein;(source:Araport11) protein_coding	AT1G02705	0.599545	1.47562	-1.20304	-1.25729	0.224456	0.33214	hypothetical protein;(source:Araport11) protein_coding
AT1G02720	3.61533	4.69017	-0.263416	-0.556779	0.584422	0.686372	Encodes a protein with putative galacturonosyltransferase activity. protein_coding GALACTURONOSYLTRANSFERASE-LIKE 5 (GATL5) (ATGATL5);GALACTURONOSYLTRANSFERASE-LIKE 5 (GATL5)	AT1G02720	5.64265	10.9763	-0.943248	-2.46002	0.0240492	0.0791379	Encodes a protein with putative galacturonosyltransferase activity. protein_coding GALACTURONOSYLTRANSFERASE-LIKE 5 (GATL5) (ATGATL5);GALACTURONOSYLTRANSFERASE-LIKE 5 (GATL5)	AT1G02720	4.31199	4.69017	-0.273291	-0.563239	0.580106	0.729628	Encodes a protein with putative galacturonosyltransferase activity. protein_coding GALACTURONOSYLTRANSFERASE-LIKE 5 (GATL5) (ATGATL5);GALACTURONOSYLTRANSFERASE-LIKE 5 (GATL5)	AT1G02720	2.38625	10.9763	-2.23387	-4.25544	0.000460244	0.0020931	Encodes a protein with putative galacturonosyltransferase activity. protein_coding GALACTURONOSYLTRANSFERASE-LIKE 5 (GATL5) (ATGATL5);GALACTURONOSYLTRANSFERASE-LIKE 5 (GATL5)
AT1G02730	3.46395	3.5183	-0.480338	-0.673193	0.509235	0.622123	Encodes a gene similar to cellulose synthase. Knock-out mutant has reduced growth, reduced xylan level and reduced xylan synthase activity in stems.It's expression is cell cycle dependent and it appears to function in cell plate formation. protein_coding CELLULOSE SYNTHASE-LIKE D5 (CSLD5) SALT OVERLY SENSITIVE 6 (SOS6);CELLULOSE SYNTHASE LIKE D5 (CSLD5);CELLULOSE SYNTHASE-LIKE D5 (ATCSLD5);CELLUL…	AT1G02730	1.37007	19.8815	-4.27309	-4.65136	0.00019053	0.00230489	Encodes a gene similar to cellulose synthase. Knock-out mutant has reduced growth, reduced xylan level and reduced xylan synthase activity in stems.It's expression is cell cycle dependent and it appears to function in cell plate formation. protein_coding CELLULOSE SYNTHASE-LIKE D5 (CSLD5) SALT OVERLY SENSITIVE 6 (SOS6);CELLULOSE SYNTHASE LIKE D5 (CSLD5);CELLULOSE SYNTHASE-LIKE D5 (ATCSLD5);CELLUL…	AT1G02730	6.2313	3.5183	0.620073	0.984909	0.337509	0.519736	Encodes a gene similar to cellulose synthase. Knock-out mutant has reduced growth, reduced xylan level and reduced xylan synthase activity in stems.It's expression is cell cycle dependent and it appears to function in cell plate formation. protein_coding CELLULOSE SYNTHASE-LIKE D5 (CSLD5) SALT OVERLY SENSITIVE 6 (SOS6);CELLULOSE SYNTHASE LIKE D5 (CSLD5);CELLULOSE SYNTHASE-LIKE D5 (ATCSLD5);CELLUL…	AT1G02730	6.81586	19.8815	-1.6341	-3.59903	0.00200702	0.00707427	Encodes a gene similar to cellulose synthase. Knock-out mutant has reduced growth, reduced xylan level and reduced xylan synthase activity in stems.It's expression is cell cycle dependent and it appears to function in cell plate formation. protein_coding CELLULOSE SYNTHASE-LIKE D5 (CSLD5) SALT OVERLY SENSITIVE 6 (SOS6);CELLULOSE SYNTHASE LIKE D5 (CSLD5);CELLULOSE SYNTHASE-LIKE D5 (ATCSLD5);CELLUL…
AT1G02740	11.5093	8.77009	0.429702	1.58943	0.129086	0.217062	MRG1 and MRG2 proteins act as readers of H3K4me3/H3K36me3 marked chromatin. They interact with each other as well as several other protein classes, to modulate the activity of flowering genes. protein_coding MORF RELATED GENE 2 (MRG2) MORF RELATED GENE 2 (MRG2)	AT1G02740	12.1903	6.85773	0.823329	2.64564	0.0162838	0.0598208	MRG1 and MRG2 proteins act as readers of H3K4me3/H3K36me3 marked chromatin. They interact with each other as well as several other protein classes, to modulate the activity of flowering genes. protein_coding MORF RELATED GENE 2 (MRG2) MORF RELATED GENE 2 (MRG2)	AT1G02740	7.62692	8.77009	-0.146486	-0.488626	0.630909	0.767443	MRG1 and MRG2 proteins act as readers of H3K4me3/H3K36me3 marked chromatin. They interact with each other as well as several other protein classes, to modulate the activity of flowering genes. protein_coding MORF RELATED GENE 2 (MRG2) MORF RELATED GENE 2 (MRG2)	AT1G02740	15.2366	6.85773	1.13975	3.75681	0.00140885	0.00528621	MRG1 and MRG2 proteins act as readers of H3K4me3/H3K36me3 marked chromatin. They interact with each other as well as several other protein classes, to modulate the activity of flowering genes. protein_coding MORF RELATED GENE 2 (MRG2) MORF RELATED GENE 2 (MRG2)
AT1G02750	7.6697	11.6944	-0.630841	-2.62912	0.0168644	0.0438156	Drought-responsive family protein;(source:Araport11) protein_coding	AT1G02750	7.15968	5.60591	0.389857	1.21047	0.241498	0.402679	Drought-responsive family protein;(source:Araport11) protein_coding	AT1G02750	8.69136	11.6944	-0.484465	-1.98022	0.062912	0.174223	Drought-responsive family protein;(source:Araport11) protein_coding	AT1G02750	8.79705	5.60591	0.711157	2.2682	0.0356387	0.0757231	Drought-responsive family protein;(source:Araport11) protein_coding
AT1G02780	318.367	138.106	1.20524	6.21811	6.70433e-06	8.27563e-05	Ribosomal protein L19e family protein;(source:Araport11) protein_coding EMBRYO DEFECTIVE 2386 (emb2386) EMBRYO DEFECTIVE 2386 (emb2386)	AT1G02780	319.124	226.094	0.531519	2.76454	0.0126329	0.0500909	Ribosomal protein L19e family protein;(source:Araport11) protein_coding EMBRYO DEFECTIVE 2386 (emb2386) EMBRYO DEFECTIVE 2386 (emb2386)	AT1G02780	171.683	138.106	0.296663	1.57992	0.131249	0.283977	Ribosomal protein L19e family protein;(source:Araport11) protein_coding EMBRYO DEFECTIVE 2386 (emb2386) EMBRYO DEFECTIVE 2386 (emb2386)	AT1G02780	300.252	226.094	0.41244	2.15387	0.0448131	0.0913623	Ribosomal protein L19e family protein;(source:Araport11) protein_coding EMBRYO DEFECTIVE 2386 (emb2386) EMBRYO DEFECTIVE 2386 (emb2386)
AT1G02816	5.18056	6.98555	-0.399513	-1.55833	0.136276	0.226307	pectinesterase (Protein of unknown function, DUF538);(source:Araport11) protein_coding	AT1G02816	2.53188	2.14359	0.350419	0.738226	0.469737	0.630263	pectinesterase (Protein of unknown function, DUF538);(source:Araport11) protein_coding	AT1G02816	8.7667	6.98555	0.34614	1.42031	0.172328	0.33897	pectinesterase (Protein of unknown function, DUF538);(source:Araport11) protein_coding	AT1G02816	2.38444	2.14359	0.251758	0.516206	0.61189	0.713037	pectinesterase (Protein of unknown function, DUF538);(source:Araport11) protein_coding
AT1G02820	0.302659	0.142413	-0.607661	-0.352149	0.728748	0.805891	Late embryogenesis abundant 3 (LEA3) family protein;(source:Araport11) protein_coding LATE EMBRYOGENESIS ABUNDANT 3 (LEA3) LATE EMBRYOGENESIS ABUNDANT 3 (LEA3);LATE EMBRYOGENESIS ABUNDANT 38 (LEA2); (ATLEA3)	AT1G02820	0.888653	0.522312	0.709225	0.785539	0.442187	0.606643	Late embryogenesis abundant 3 (LEA3) family protein;(source:Araport11) protein_coding LATE EMBRYOGENESIS ABUNDANT 3 (LEA3) LATE EMBRYOGENESIS ABUNDANT 3 (LEA3);LATE EMBRYOGENESIS ABUNDANT 38 (LEA2); (ATLEA3)	AT1G02820	0.434882	0.142413	2.30208	1.62353	0.121571	0.270758	Late embryogenesis abundant 3 (LEA3) family protein;(source:Araport11) protein_coding LATE EMBRYOGENESIS ABUNDANT 3 (LEA3) LATE EMBRYOGENESIS ABUNDANT 3 (LEA3);LATE EMBRYOGENESIS ABUNDANT 38 (LEA2); (ATLEA3)	AT1G02820	0.351559	0.522312	-0.791269	-0.733182	0.472733	0.588512	Late embryogenesis abundant 3 (LEA3) family protein;(source:Araport11) protein_coding LATE EMBRYOGENESIS ABUNDANT 3 (LEA3) LATE EMBRYOGENESIS ABUNDANT 3 (LEA3);LATE EMBRYOGENESIS ABUNDANT 38 (LEA2); (ATLEA3)
AT1G02840	53.1422	96.439	-0.859397	-7.16351	1.03181e-06	1.89619e-05	SR34/SR1 is a plant homologue of the human general/alternative splicing factor SF2/ASF. Barta et al (2010) have proposed a nomenclature for Serine/Arginine-Rich Protein Splicing Factors (SR proteins): Plant Cell. 2010, 22:2926. protein_coding SERINE/ARGININE-RICH PROTEIN SPLICING FACTOR 34 (SR34) (SR1); (ATSRP34);SERINE/ARGININE-RICH PROTEIN SPLICING FACTOR 34 (At-SR34);SERINE/ARGININE-RICH PROTE…	AT1G02840	58.2936	55.1729	0.0910266	0.728705	0.475402	0.635008	SR34/SR1 is a plant homologue of the human general/alternative splicing factor SF2/ASF. Barta et al (2010) have proposed a nomenclature for Serine/Arginine-Rich Protein Splicing Factors (SR proteins): Plant Cell. 2010, 22:2926. protein_coding SERINE/ARGININE-RICH PROTEIN SPLICING FACTOR 34 (SR34) (SR1); (ATSRP34);SERINE/ARGININE-RICH PROTEIN SPLICING FACTOR 34 (At-SR34);SERINE/ARGININE-RICH PROTE…	AT1G02840	44.8499	96.439	-1.10348	-9.04731	3.53359e-08	3.51246e-06	SR34/SR1 is a plant homologue of the human general/alternative splicing factor SF2/ASF. Barta et al (2010) have proposed a nomenclature for Serine/Arginine-Rich Protein Splicing Factors (SR proteins): Plant Cell. 2010, 22:2926. protein_coding SERINE/ARGININE-RICH PROTEIN SPLICING FACTOR 34 (SR34) (SR1); (ATSRP34);SERINE/ARGININE-RICH PROTEIN SPLICING FACTOR 34 (At-SR34);SERINE/ARGININE-RICH PROTE…	AT1G02840	62.1945	55.1729	0.182373	1.4632	0.160373	0.254444	SR34/SR1 is a plant homologue of the human general/alternative splicing factor SF2/ASF. Barta et al (2010) have proposed a nomenclature for Serine/Arginine-Rich Protein Splicing Factors (SR proteins): Plant Cell. 2010, 22:2926. protein_coding SERINE/ARGININE-RICH PROTEIN SPLICING FACTOR 34 (SR34) (SR1); (ATSRP34);SERINE/ARGININE-RICH PROTEIN SPLICING FACTOR 34 (At-SR34);SERINE/ARGININE-RICH PROTE…
AT1G02850	3.11196	10.3365	-2.00581	-2.85874	0.0103109	0.0296556	beta glucosidase 11;(source:Araport11) protein_coding BETA GLUCOSIDASE 11 (BGLU11) BETA GLUCOSIDASE 11 (BGLU11)	AT1G02850	5.49578	0.213047	5.18966	2.05029	0.054937	0.143587	beta glucosidase 11;(source:Araport11) protein_coding BETA GLUCOSIDASE 11 (BGLU11) BETA GLUCOSIDASE 11 (BGLU11)	AT1G02850	5.74406	10.3365	-0.98574	-1.57169	0.133148	0.286469	beta glucosidase 11;(source:Araport11) protein_coding BETA GLUCOSIDASE 11 (BGLU11) BETA GLUCOSIDASE 11 (BGLU11)	AT1G02850	16.9174	0.213047	6.83467	2.73512	0.0134555	0.0339999	beta glucosidase 11;(source:Araport11) protein_coding BETA GLUCOSIDASE 11 (BGLU11) BETA GLUCOSIDASE 11 (BGLU11)
AT1G02860	40.8393	31.089	0.373877	1.57243	0.132975	0.222221	Encodes a ubiquitin E3 ligase with RING and SPX domains that is involved in mediating immune responses and mediates degradation of PHT1s at plasma membranes. Targeted by MIR827. Ubiquitinates PHT1;3, PHT1;2, PHT1;1/AtPT1 and PHT1;4/AtPT2. protein_coding NITROGEN LIMITATION ADAPTATION (NLA) NITROGEN LIMITATION ADAPTATION (NLA); (SYG1);BENZOIC ACID HYPERSENSITIVE 1 (BAH1)	AT1G02860	10.7416	4.83382	1.13463	2.53507	0.0205624	0.0709469	Encodes a ubiquitin E3 ligase with RING and SPX domains that is involved in mediating immune responses and mediates degradation of PHT1s at plasma membranes. Targeted by MIR827. Ubiquitinates PHT1;3, PHT1;2, PHT1;1/AtPT1 and PHT1;4/AtPT2. protein_coding NITROGEN LIMITATION ADAPTATION (NLA) NITROGEN LIMITATION ADAPTATION (NLA); (SYG1);BENZOIC ACID HYPERSENSITIVE 1 (BAH1)	AT1G02860	31.3285	31.089	0.0258938	0.105666	0.916996	0.954967	Encodes a ubiquitin E3 ligase with RING and SPX domains that is involved in mediating immune responses and mediates degradation of PHT1s at plasma membranes. Targeted by MIR827. Ubiquitinates PHT1;3, PHT1;2, PHT1;1/AtPT1 and PHT1;4/AtPT2. protein_coding NITROGEN LIMITATION ADAPTATION (NLA) NITROGEN LIMITATION ADAPTATION (NLA); (SYG1);BENZOIC ACID HYPERSENSITIVE 1 (BAH1)	AT1G02860	2.41564	4.83382	-1.00826	-1.59783	0.127199	0.211401	Encodes a ubiquitin E3 ligase with RING and SPX domains that is involved in mediating immune responses and mediates degradation of PHT1s at plasma membranes. Targeted by MIR827. Ubiquitinates PHT1;3, PHT1;2, PHT1;1/AtPT1 and PHT1;4/AtPT2. protein_coding NITROGEN LIMITATION ADAPTATION (NLA) NITROGEN LIMITATION ADAPTATION (NLA); (SYG1);BENZOIC ACID HYPERSENSITIVE 1 (BAH1)
AT1G02870	11.8605	5.46877	1.17048	2.25924	0.0362895	0.0803123	nucleolar-like protein;(source:Araport11) protein_coding	AT1G02870	7.78817	4.87636	0.685905	1.19257	0.248267	0.410653	nucleolar-like protein;(source:Araport11) protein_coding	AT1G02870	5.59588	5.46877	0.241188	0.412865	0.684502	0.806505	nucleolar-like protein;(source:Araport11) protein_coding	AT1G02870	7.95205	4.87636	0.677845	1.17095	0.256637	0.369544	nucleolar-like protein;(source:Araport11) protein_coding
AT1G02880	10.0195	6.98959	0.543361	2.11849	0.048062	0.100741	Encodes a thiamine pyrophosphokinase capable of producing thiamine pyrophosphate from free thiamine. protein_coding THIAMIN PYROPHOSPHOKINASE1 (TPK1) THIAMIN PYROPHOSPHOKINASE1 (TPK1)	AT1G02880	9.09427	8.57369	0.0868699	0.323213	0.750197	0.845566	Encodes a thiamine pyrophosphokinase capable of producing thiamine pyrophosphate from free thiamine. protein_coding THIAMIN PYROPHOSPHOKINASE1 (TPK1) THIAMIN PYROPHOSPHOKINASE1 (TPK1)	AT1G02880	12.5802	6.98959	0.867316	3.37786	0.00329	0.0223703	Encodes a thiamine pyrophosphokinase capable of producing thiamine pyrophosphate from free thiamine. protein_coding THIAMIN PYROPHOSPHOKINASE1 (TPK1) THIAMIN PYROPHOSPHOKINASE1 (TPK1)	AT1G02880	15.1083	8.57369	0.809136	3.24765	0.00439417	0.0135046	Encodes a thiamine pyrophosphokinase capable of producing thiamine pyrophosphate from free thiamine. protein_coding THIAMIN PYROPHOSPHOKINASE1 (TPK1) THIAMIN PYROPHOSPHOKINASE1 (TPK1)
AT1G02890	278.049	223.336	0.311828	2.36282	0.0293922	0.0678951	AAA-type ATPase family protein;(source:Araport11) protein_coding	AT1G02890	146.003	121.264	0.269163	2.13515	0.0465063	0.127124	AAA-type ATPase family protein;(source:Araport11) protein_coding	AT1G02890	255.874	223.336	0.187445	1.43765	0.16741	0.333595	AAA-type ATPase family protein;(source:Araport11) protein_coding	AT1G02890	140.732	121.264	0.21149	1.68118	0.109711	0.187975	AAA-type ATPase family protein;(source:Araport11) protein_coding
AT1G02910	17.0807	27.4562	-0.701688	-3.27857	0.00410292	0.0142295	Mutants defective in this gene were shown to have a reduced PSII content (overall reduction in the levels of several PSII subunits) and a disrupted grana stack structure. The N-terminal half of the protein contains two tetratricopeptide repeat (TPR) motifs that are arranged tandemly, each consisting of a 34-residue degenerate consensus sequence. The N-terminal sequence is rich in positive and hyd…	AT1G02910	39.7715	44.4308	-0.148804	-0.758401	0.457865	0.62045	Mutants defective in this gene were shown to have a reduced PSII content (overall reduction in the levels of several PSII subunits) and a disrupted grana stack structure. The N-terminal half of the protein contains two tetratricopeptide repeat (TPR) motifs that are arranged tandemly, each consisting of a 34-residue degenerate consensus sequence. The N-terminal sequence is rich in positive and hyd…	AT1G02910	19.712	27.4562	-0.461314	-2.13344	0.0466639	0.14313	Mutants defective in this gene were shown to have a reduced PSII content (overall reduction in the levels of several PSII subunits) and a disrupted grana stack structure. The N-terminal half of the protein contains two tetratricopeptide repeat (TPR) motifs that are arranged tandemly, each consisting of a 34-residue degenerate consensus sequence. The N-terminal sequence is rich in positive and hyd…	AT1G02910	33.7307	44.4308	-0.388714	-1.94856	0.0668453	0.126277	Mutants defective in this gene were shown to have a reduced PSII content (overall reduction in the levels of several PSII subunits) and a disrupted grana stack structure. The N-terminal half of the protein contains two tetratricopeptide repeat (TPR) motifs that are arranged tandemly, each consisting of a 34-residue degenerate consensus sequence. The N-terminal sequence is rich in positive and hyd…
AT1G02920	126.275	33.6861	1.79389	6.23379	6.49319e-06	8.06796e-05	Encodes glutathione transferase belonging to the phi class of GSTs. Naming convention according to Wagner et al. (2002). protein_coding GLUTATHIONE S-TRANSFERASE 7 (GSTF7) (ATGSTF7);GLUTATHIONE S-TRANSFERASE 11 (GST11);ARABIDOPSIS GLUTATHIONE S-TRANSFERASE 11 (ATGST11);GLUTATHIONE S-TRANSFERASE 7 (GSTF7); (ATGSTF8)	AT1G02920	124.763	11.0865	3.45522	9.3569	2.11832e-08	4.10276e-06	Encodes glutathione transferase belonging to the phi class of GSTs. Naming convention according to Wagner et al. (2002). protein_coding GLUTATHIONE S-TRANSFERASE 7 (GSTF7) (ATGSTF7);GLUTATHIONE S-TRANSFERASE 11 (GST11);ARABIDOPSIS GLUTATHIONE S-TRANSFERASE 11 (ATGST11);GLUTATHIONE S-TRANSFERASE 7 (GSTF7); (ATGSTF8)	AT1G02920	105.734	33.6861	1.64245	5.74029	1.80576e-05	0.000460309	Encodes glutathione transferase belonging to the phi class of GSTs. Naming convention according to Wagner et al. (2002). protein_coding GLUTATHIONE S-TRANSFERASE 7 (GSTF7) (ATGSTF7);GLUTATHIONE S-TRANSFERASE 11 (GST11);ARABIDOPSIS GLUTATHIONE S-TRANSFERASE 11 (ATGST11);GLUTATHIONE S-TRANSFERASE 7 (GSTF7); (ATGSTF8)	AT1G02920	795.786	11.0865	6.14502	16.0987	2.96554e-12	4.6428e-09	Encodes glutathione transferase belonging to the phi class of GSTs. Naming convention according to Wagner et al. (2002). protein_coding GLUTATHIONE S-TRANSFERASE 7 (GSTF7) (ATGSTF7);GLUTATHIONE S-TRANSFERASE 11 (GST11);ARABIDOPSIS GLUTATHIONE S-TRANSFERASE 11 (ATGST11);GLUTATHIONE S-TRANSFERASE 7 (GSTF7); (ATGSTF8)
AT1G02930	236.493	49.9425	2.08801	5.89538	1.30501e-05	0.000141412	Encodes glutathione transferase belonging to the phi class of GSTs. Naming convention according to Wagner et al. (2002). protein_coding GLUTATHIONE S-TRANSFERASE 6 (GSTF6) ARABIDOPSIS GLUTATHIONE S-TRANSFERASE 1 (ATGST1);GLUTATHIONE S-TRANSFERASE (ATGSTF6);GLUTATHIONE S-TRANSFERASE 6 (GSTF6);EARLY RESPONSIVE TO DEHYDRATION 11 (ERD11);ARABIDOPSIS THALIANA GLUATIONE S-TRANSFERASE F3 (ATGSTF3);GLUTA…	AT1G02930	85.3675	8.04165	3.32971	6.47553	3.98001e-06	0.000141883	Encodes glutathione transferase belonging to the phi class of GSTs. Naming convention according to Wagner et al. (2002). protein_coding GLUTATHIONE S-TRANSFERASE 6 (GSTF6) ARABIDOPSIS GLUTATHIONE S-TRANSFERASE 1 (ATGST1);GLUTATHIONE S-TRANSFERASE (ATGSTF6);GLUTATHIONE S-TRANSFERASE 6 (GSTF6);EARLY RESPONSIVE TO DEHYDRATION 11 (ERD11);ARABIDOPSIS THALIANA GLUATIONE S-TRANSFERASE F3 (ATGSTF3);GLUTA…	AT1G02930	151.134	49.9425	1.53203	4.41247	0.000324049	0.004062	Encodes glutathione transferase belonging to the phi class of GSTs. Naming convention according to Wagner et al. (2002). protein_coding GLUTATHIONE S-TRANSFERASE 6 (GSTF6) ARABIDOPSIS GLUTATHIONE S-TRANSFERASE 1 (ATGST1);GLUTATHIONE S-TRANSFERASE (ATGSTF6);GLUTATHIONE S-TRANSFERASE 6 (GSTF6);EARLY RESPONSIVE TO DEHYDRATION 11 (ERD11);ARABIDOPSIS THALIANA GLUATIONE S-TRANSFERASE F3 (ATGSTF3);GLUTA…	AT1G02930	837.672	8.04165	6.69636	12.667	1.68862e-10	3.92317e-08	Encodes glutathione transferase belonging to the phi class of GSTs. Naming convention according to Wagner et al. (2002). protein_coding GLUTATHIONE S-TRANSFERASE 6 (GSTF6) ARABIDOPSIS GLUTATHIONE S-TRANSFERASE 1 (ATGST1);GLUTATHIONE S-TRANSFERASE (ATGSTF6);GLUTATHIONE S-TRANSFERASE 6 (GSTF6);EARLY RESPONSIVE TO DEHYDRATION 11 (ERD11);ARABIDOPSIS THALIANA GLUATIONE S-TRANSFERASE F3 (ATGSTF3);GLUTA…
AT1G02940	1.68913	0	6.3411	3.44386	0.00283971	0.010702	Encodes glutathione transferase belonging to the phi class of GSTs. Naming convention according to Wagner et al. (2002). protein_coding GLUTATHIONE S-TRANSFERASE (CLASS PHI) 5 (GSTF5) GLUTATHIONE S-TRANSFERASE (CLASS PHI) 5 (GSTF5);GLUTATHIONE S-TRANSFERASE (CLASS PHI) 5 (ATGSTF5)	AT1G02940	0.278067	0.325016	0.910372	0.504441	0.61997	0.751245	Encodes glutathione transferase belonging to the phi class of GSTs. Naming convention according to Wagner et al. (2002). protein_coding GLUTATHIONE S-TRANSFERASE (CLASS PHI) 5 (GSTF5) GLUTATHIONE S-TRANSFERASE (CLASS PHI) 5 (GSTF5);GLUTATHIONE S-TRANSFERASE (CLASS PHI) 5 (ATGSTF5)	AT1G02940	1.28936	0	6.15041	3.28477	0.00404678	0.0258755	Encodes glutathione transferase belonging to the phi class of GSTs. Naming convention according to Wagner et al. (2002). protein_coding GLUTATHIONE S-TRANSFERASE (CLASS PHI) 5 (GSTF5) GLUTATHIONE S-TRANSFERASE (CLASS PHI) 5 (GSTF5);GLUTATHIONE S-TRANSFERASE (CLASS PHI) 5 (ATGSTF5)	AT1G02940	0.98999	0.325016	2.82413	1.79159	0.0897472	0.159879	Encodes glutathione transferase belonging to the phi class of GSTs. Naming convention according to Wagner et al. (2002). protein_coding GLUTATHIONE S-TRANSFERASE (CLASS PHI) 5 (GSTF5) GLUTATHIONE S-TRANSFERASE (CLASS PHI) 5 (GSTF5);GLUTATHIONE S-TRANSFERASE (CLASS PHI) 5 (ATGSTF5)
AT1G02950	5.07796	1.69183	1.55687	2.60128	0.0178875	0.0459967	Encodes glutathione transferase belonging to the phi class of GSTs. Naming convention according to Wagner et al. (2002). protein_coding GLUTATHIONE S-TRANSFERASE F4 (GSTF4) GLUTATHIONE S-TRANSFERASE F4 (GSTF4);GLUTATHIONE S-TRANSFERASE 31 (GST31);GLUTATHIONE S-TRANSFERASE F4 (ATGSTF4)	AT1G02950	0.351352	1.2448	-3.22799	-2.24579	0.0372874	0.108617	Encodes glutathione transferase belonging to the phi class of GSTs. Naming convention according to Wagner et al. (2002). protein_coding GLUTATHIONE S-TRANSFERASE F4 (GSTF4) GLUTATHIONE S-TRANSFERASE F4 (GSTF4);GLUTATHIONE S-TRANSFERASE 31 (GST31);GLUTATHIONE S-TRANSFERASE F4 (ATGSTF4)	AT1G02950	2.83414	1.69183	0.669063	1.02671	0.317935	0.500213	Encodes glutathione transferase belonging to the phi class of GSTs. Naming convention according to Wagner et al. (2002). protein_coding GLUTATHIONE S-TRANSFERASE F4 (GSTF4) GLUTATHIONE S-TRANSFERASE F4 (GSTF4);GLUTATHIONE S-TRANSFERASE 31 (GST31);GLUTATHIONE S-TRANSFERASE F4 (ATGSTF4)	AT1G02950	1.12934	1.2448	-0.251837	-0.277253	0.784693	0.85096	Encodes glutathione transferase belonging to the phi class of GSTs. Naming convention according to Wagner et al. (2002). protein_coding GLUTATHIONE S-TRANSFERASE F4 (GSTF4) GLUTATHIONE S-TRANSFERASE F4 (GSTF4);GLUTATHIONE S-TRANSFERASE 31 (GST31);GLUTATHIONE S-TRANSFERASE F4 (ATGSTF4)
AT1G02960	11.5971	21.4841	-0.851401	-3.31503	0.00378376	0.0133695	kinetochore protein;(source:Araport11) protein_coding	AT1G02960	9.17317	12.0489	-0.433525	-1.31862	0.203558	0.35868	kinetochore protein;(source:Araport11) protein_coding	AT1G02960	17.2154	21.4841	-0.326173	-1.29705	0.210726	0.384471	kinetochore protein;(source:Araport11) protein_coding	AT1G02960	7.05112	12.0489	-0.776547	-2.22711	0.0387159	0.0810719	kinetochore protein;(source:Araport11) protein_coding
AT1G02970	0.428454	0	3.19107	1.49214	0.152696	0.24722	Protein kinase that negatively regulates the entry into mitosis. protein_coding WEE1 KINASE HOMOLOG (WEE1) (ATWEE1);WEE1 KINASE HOMOLOG (WEE1)	AT1G02970	0.414004	2.1414	-2.17918	-1.93117	0.069097	0.168522	Protein kinase that negatively regulates the entry into mitosis. protein_coding WEE1 KINASE HOMOLOG (WEE1) (ATWEE1);WEE1 KINASE HOMOLOG (WEE1)	AT1G02970	0.188039	0	2.10543	0.897054	0.381337	0.561815	Protein kinase that negatively regulates the entry into mitosis. protein_coding WEE1 KINASE HOMOLOG (WEE1) (ATWEE1);WEE1 KINASE HOMOLOG (WEE1)	AT1G02970	2.29399	2.1414	0.304571	0.407473	0.688386	0.775947	Protein kinase that negatively regulates the entry into mitosis. protein_coding WEE1 KINASE HOMOLOG (WEE1) (ATWEE1);WEE1 KINASE HOMOLOG (WEE1)
AT1G02990	40.2875	60.9503	-0.612977	-3.06565	0.00656609	0.0207393	hypothetical protein;(source:Araport11) protein_coding	AT1G02990	44.1798	36.6199	0.284205	1.32647	0.200996	0.355766	hypothetical protein;(source:Araport11) protein_coding	AT1G02990	51.0553	60.9503	-0.276667	-1.38133	0.183808	0.353233	hypothetical protein;(source:Araport11) protein_coding	AT1G02990	45.7085	36.6199	0.328616	1.53564	0.141731	0.230197	hypothetical protein;(source:Araport11) protein_coding
AT1G03000	85.9161	52.8807	0.689401	4.02724	0.00076764	0.00374394	Encodes an apparent ATPase similar to yeast and human protein required for peroxisomal biogenesis. May facilitate recycling of PEX5, the peroxisomal matrix protein receptor, and thereby promote peroxisomal matrix protein import. protein_coding PEROXIN 6 (PEX6) PEROXIN 6 (PEX6)	AT1G03000	34.0782	37.3427	-0.113241	-0.605205	0.552473	0.697627	Encodes an apparent ATPase similar to yeast and human protein required for peroxisomal biogenesis. May facilitate recycling of PEX5, the peroxisomal matrix protein receptor, and thereby promote peroxisomal matrix protein import. protein_coding PEROXIN 6 (PEX6) PEROXIN 6 (PEX6)	AT1G03000	83.5014	52.8807	0.642835	3.75638	0.00141022	0.0119726	Encodes an apparent ATPase similar to yeast and human protein required for peroxisomal biogenesis. May facilitate recycling of PEX5, the peroxisomal matrix protein receptor, and thereby promote peroxisomal matrix protein import. protein_coding PEROXIN 6 (PEX6) PEROXIN 6 (PEX6)	AT1G03000	29.6375	37.3427	-0.324494	-1.70389	0.105317	0.182124	Encodes an apparent ATPase similar to yeast and human protein required for peroxisomal biogenesis. May facilitate recycling of PEX5, the peroxisomal matrix protein receptor, and thereby promote peroxisomal matrix protein import. protein_coding PEROXIN 6 (PEX6) PEROXIN 6 (PEX6)
AT1G03010	6.7294	4.15559	0.866197	1.88225	0.0757982	0.143733	Phototropic-responsive NPH3 family protein;(source:Araport11) protein_coding	AT1G03010	0.558564	0.479197	0.219801	0.163887	0.871616	0.923512	Phototropic-responsive NPH3 family protein;(source:Araport11) protein_coding	AT1G03010	8.38716	4.15559	1.25618	2.72475	0.0137576	0.0617147	Phototropic-responsive NPH3 family protein;(source:Araport11) protein_coding	AT1G03010	0.0998153	0.479197	-2.94695	-1.45119	0.163649	0.258338	Phototropic-responsive NPH3 family protein;(source:Araport11) protein_coding
AT1G03020	0.591751	0.139816	1.79377	1.06777	0.299506	0.418662	Encodes a member of the CC-type glutaredoxin (ROXY) family that has been shown to interact with the transcription factor TGA2. protein_coding (GRXS1) (ROXY16); (GRXS1)	AT1G03020	2.54197	0.59928	1.94539	1.84028	0.0819982	0.190232	Encodes a member of the CC-type glutaredoxin (ROXY) family that has been shown to interact with the transcription factor TGA2. protein_coding (GRXS1) (ROXY16); (GRXS1)	AT1G03020	0.350901	0.139816	1.18654	0.658703	0.518287	0.68143	Encodes a member of the CC-type glutaredoxin (ROXY) family that has been shown to interact with the transcription factor TGA2. protein_coding (GRXS1) (ROXY16); (GRXS1)	AT1G03020	0.487527	0.59928	-1.58201	-1.00654	0.327275	0.444064	Encodes a member of the CC-type glutaredoxin (ROXY) family that has been shown to interact with the transcription factor TGA2. protein_coding (GRXS1) (ROXY16); (GRXS1)
AT1G03030	53.7174	16.6156	1.68956	10.2495	5.15503e-09	3.27825e-07	P-loop containing nucleoside triphosphate hydrolases superfamily protein;(source:Araport11) protein_coding	AT1G03030	24.0255	11.6273	1.04087	5.27935	4.82233e-05	0.000849082	P-loop containing nucleoside triphosphate hydrolases superfamily protein;(source:Araport11) protein_coding	AT1G03030	29.5683	16.6156	0.810331	4.74874	0.000153617	0.00232368	P-loop containing nucleoside triphosphate hydrolases superfamily protein;(source:Araport11) protein_coding	AT1G03030	14.3745	11.6273	0.290717	1.38449	0.182856	0.281976	P-loop containing nucleoside triphosphate hydrolases superfamily protein;(source:Araport11) protein_coding
AT1G03040	37.3196	37.1223	0.000431032	0.00234559	0.998154	0.998579	Governs the competence of pericycle cells to initiate lateral root primordium formation. protein_coding (BHLH007) PERICYCLE FACTOR TYPE-B 2 (PFB2); (BHLH007)	AT1G03040	23.8943	28.3483	-0.209197	-1.00986	0.325724	0.495216	Governs the competence of pericycle cells to initiate lateral root primordium formation. protein_coding (BHLH007) PERICYCLE FACTOR TYPE-B 2 (PFB2); (BHLH007)	AT1G03040	37.9184	37.1223	0.0403197	0.21658	0.830931	0.902196	Governs the competence of pericycle cells to initiate lateral root primordium formation. protein_coding (BHLH007) PERICYCLE FACTOR TYPE-B 2 (PFB2); (BHLH007)	AT1G03040	40.5274	28.3483	0.545056	2.76338	0.0126644	0.0323664	Governs the competence of pericycle cells to initiate lateral root primordium formation. protein_coding (BHLH007) PERICYCLE FACTOR TYPE-B 2 (PFB2); (BHLH007)
AT1G03055	0.760948	0.622139	1.03962	0.973387	0.343049	0.464027	Encodes the ortholog of rice D27. It is plastid-localized and is required for the inhibition of secondary bud outgrowth and operates on a nonmobile precursor upstream of MAX1 in the SL biosynthesis pathway. protein_coding DWARF27 (D27) A. THALIANA HOMOLOG OF RICE D27 (ATD27);DWARF27 (D27)	AT1G03055	2.98522	4.02195	-0.508882	-1.10642	0.282873	0.450106	Encodes the ortholog of rice D27. It is plastid-localized and is required for the inhibition of secondary bud outgrowth and operates on a nonmobile precursor upstream of MAX1 in the SL biosynthesis pathway. protein_coding DWARF27 (D27) A. THALIANA HOMOLOG OF RICE D27 (ATD27);DWARF27 (D27)	AT1G03055	1.29948	0.622139	2.05689	2.02469	0.0577387	0.164808	Encodes the ortholog of rice D27. It is plastid-localized and is required for the inhibition of secondary bud outgrowth and operates on a nonmobile precursor upstream of MAX1 in the SL biosynthesis pathway. protein_coding DWARF27 (D27) A. THALIANA HOMOLOG OF RICE D27 (ATD27);DWARF27 (D27)	AT1G03055	1.34251	4.02195	-1.62293	-2.70282	0.0144177	0.0359858	Encodes the ortholog of rice D27. It is plastid-localized and is required for the inhibition of secondary bud outgrowth and operates on a nonmobile precursor upstream of MAX1 in the SL biosynthesis pathway. protein_coding DWARF27 (D27) A. THALIANA HOMOLOG OF RICE D27 (ATD27);DWARF27 (D27)
AT1G03060	85.9216	176.198	-1.07538	-6.28774	5.81738e-06	7.40957e-05	Encodes a WD/BEACH domain protein involved in cell morphogenesis and ribonucleoprotein particle formation. It interacts with the P-body core component DCP2, associates to mRNA processing bodies (P-bodies), and regulates their assembly upon salt stress. It accumulates at the root hair apex via post-Golgi compartments and positively regulates tip growth by maintaining tip-focused vesicle secretion …	AT1G03060	159.214	188.08	-0.242398	-1.41092	0.175038	0.323696	Encodes a WD/BEACH domain protein involved in cell morphogenesis and ribonucleoprotein particle formation. It interacts with the P-body core component DCP2, associates to mRNA processing bodies (P-bodies), and regulates their assembly upon salt stress. It accumulates at the root hair apex via post-Golgi compartments and positively regulates tip growth by maintaining tip-focused vesicle secretion …	AT1G03060	150.955	176.198	-0.222728	-1.29164	0.212555	0.38707	Encodes a WD/BEACH domain protein involved in cell morphogenesis and ribonucleoprotein particle formation. It interacts with the P-body core component DCP2, associates to mRNA processing bodies (P-bodies), and regulates their assembly upon salt stress. It accumulates at the root hair apex via post-Golgi compartments and positively regulates tip growth by maintaining tip-focused vesicle secretion …	AT1G03060	345.93	188.08	0.876841	4.98176	9.20528e-05	0.000569255	Encodes a WD/BEACH domain protein involved in cell morphogenesis and ribonucleoprotein particle formation. It interacts with the P-body core component DCP2, associates to mRNA processing bodies (P-bodies), and regulates their assembly upon salt stress. It accumulates at the root hair apex via post-Golgi compartments and positively regulates tip growth by maintaining tip-focused vesicle secretion …
AT1G03080	110.156	307.678	-1.4768	-6.30481	5.61893e-06	7.18604e-05	kinase interacting (KIP1-like) family protein;(source:Araport11) protein_coding NETWORKED 1D (NET1D) NETWORKED 1D (NET1D)	AT1G03080	115.575	153.486	-0.487599	-2.13997	0.0460648	0.126265	kinase interacting (KIP1-like) family protein;(source:Araport11) protein_coding NETWORKED 1D (NET1D) NETWORKED 1D (NET1D)	AT1G03080	200.126	307.678	-0.613687	-2.59139	0.018265	0.0754	kinase interacting (KIP1-like) family protein;(source:Araport11) protein_coding NETWORKED 1D (NET1D) NETWORKED 1D (NET1D)	AT1G03080	226.309	153.486	0.552178	2.38887	0.0278612	0.061849	kinase interacting (KIP1-like) family protein;(source:Araport11) protein_coding NETWORKED 1D (NET1D) NETWORKED 1D (NET1D)
AT1G03090	60.0719	217.962	-1.92318	-6.62753	2.93742e-06	4.29792e-05	MCCA is the biotinylated subunit of the dimer MCCase, which is involved in leucine degradation. Both subunits are nuclear coded and the active enzyme is located in the mitochondrion. protein_coding (MCCA) (MCCA)	AT1G03090	19.2994	21.9301	-0.148435	-0.40017	0.693663	0.806276	MCCA is the biotinylated subunit of the dimer MCCase, which is involved in leucine degradation. Both subunits are nuclear coded and the active enzyme is located in the mitochondrion. protein_coding (MCCA) (MCCA)	AT1G03090	91.6381	217.962	-1.33697	-4.60594	0.000210712	0.00295235	MCCA is the biotinylated subunit of the dimer MCCase, which is involved in leucine degradation. Both subunits are nuclear coded and the active enzyme is located in the mitochondrion. protein_coding (MCCA) (MCCA)	AT1G03090	8.46384	21.9301	-1.37989	-3.10443	0.00602959	0.017557	MCCA is the biotinylated subunit of the dimer MCCase, which is involved in leucine degradation. Both subunits are nuclear coded and the active enzyme is located in the mitochondrion. protein_coding (MCCA) (MCCA)
AT1G03100	1.91023	1.57373	0.485817	0.810759	0.42792	0.547638	Pentatricopeptide repeat (PPR) superfamily protein;(source:Araport11) protein_coding	AT1G03100	3.24514	3.61079	-0.0780017	-0.178331	0.860422	0.917289	Pentatricopeptide repeat (PPR) superfamily protein;(source:Araport11) protein_coding	AT1G03100	1.90006	1.57373	0.335912	0.5389	0.59645	0.742381	Pentatricopeptide repeat (PPR) superfamily protein;(source:Araport11) protein_coding	AT1G03100	4.55251	3.61079	0.414682	1.00967	0.325817	0.442405	Pentatricopeptide repeat (PPR) superfamily protein;(source:Araport11) protein_coding
AT1G03110	2.24609	1.41222	0.711053	1.22512	0.23606	0.348105	Encodes a gene involved in the modification of nucleosides in tRNA. Mutants have no 7-methylguanosine. protein_coding TRNA MODIFICATION 82 (TRM82) (AtTRM82);TRNA MODIFICATION 82 (TRM82)	AT1G03110	3.81708	3.17428	0.378117	0.843314	0.409938	0.577065	Encodes a gene involved in the modification of nucleosides in tRNA. Mutants have no 7-methylguanosine. protein_coding TRNA MODIFICATION 82 (TRM82) (AtTRM82);TRNA MODIFICATION 82 (TRM82)	AT1G03110	1.01601	1.41222	-0.801825	-1.06597	0.300295	0.481698	Encodes a gene involved in the modification of nucleosides in tRNA. Mutants have no 7-methylguanosine. protein_coding TRNA MODIFICATION 82 (TRM82) (AtTRM82);TRNA MODIFICATION 82 (TRM82)	AT1G03110	2.53773	3.17428	-0.225364	-0.448666	0.658939	0.753422	Encodes a gene involved in the modification of nucleosides in tRNA. Mutants have no 7-methylguanosine. protein_coding TRNA MODIFICATION 82 (TRM82) (AtTRM82);TRNA MODIFICATION 82 (TRM82)
AT1G03130	1489.88	1671.12	-0.270007	-0.843755	0.409698	0.530754	Encodes a protein predicted by sequence similarity with spinach PsaD to be photosystem I reaction center subunit II (PsaD2) protein_coding PHOTOSYSTEM I SUBUNIT D-2 (PSAD-2) PHOTOSYSTEM I SUBUNIT D-2 (PSAD-2)	AT1G03130	1485.23	1471.82	0.0224405	0.0717781	0.943557	0.96587	Encodes a protein predicted by sequence similarity with spinach PsaD to be photosystem I reaction center subunit II (PsaD2) protein_coding PHOTOSYSTEM I SUBUNIT D-2 (PSAD-2) PHOTOSYSTEM I SUBUNIT D-2 (PSAD-2)	AT1G03130	1665.86	1671.12	0.00126422	0.00395986	0.996883	0.998785	Encodes a protein predicted by sequence similarity with spinach PsaD to be photosystem I reaction center subunit II (PsaD2) protein_coding PHOTOSYSTEM I SUBUNIT D-2 (PSAD-2) PHOTOSYSTEM I SUBUNIT D-2 (PSAD-2)	AT1G03130	548.78	1471.82	-1.49776	-4.98263	9.18773e-05	0.000568544	Encodes a protein predicted by sequence similarity with spinach PsaD to be photosystem I reaction center subunit II (PsaD2) protein_coding PHOTOSYSTEM I SUBUNIT D-2 (PSAD-2) PHOTOSYSTEM I SUBUNIT D-2 (PSAD-2)
AT1G03140	31.9942	77.8207	-1.30012	-7.67343	3.95362e-07	9.12656e-06	PRP18a is one of two paralogs (the other being PRP18b) which are highly similar to the step II splicing factors in yeast. Loss of function mutations show defects in alternative splicing, mostly intron retention events. protein_coding PRE-MRNA PROCESSING FACTOR 18A (PRP18A) PRE-MRNA PROCESSING FACTOR 18A (PRP18A)	AT1G03140	28.5189	29.5106	-0.0460741	-0.237812	0.814669	0.888544	PRP18a is one of two paralogs (the other being PRP18b) which are highly similar to the step II splicing factors in yeast. Loss of function mutations show defects in alternative splicing, mostly intron retention events. protein_coding PRE-MRNA PROCESSING FACTOR 18A (PRP18A) PRE-MRNA PROCESSING FACTOR 18A (PRP18A)	AT1G03140	33.7508	77.8207	-1.19854	-6.96787	1.50483e-06	6.40604e-05	PRP18a is one of two paralogs (the other being PRP18b) which are highly similar to the step II splicing factors in yeast. Loss of function mutations show defects in alternative splicing, mostly intron retention events. protein_coding PRE-MRNA PROCESSING FACTOR 18A (PRP18A) PRE-MRNA PROCESSING FACTOR 18A (PRP18A)	AT1G03140	46.315	29.5106	0.666587	3.57901	0.00209904	0.00733161	PRP18a is one of two paralogs (the other being PRP18b) which are highly similar to the step II splicing factors in yeast. Loss of function mutations show defects in alternative splicing, mostly intron retention events. protein_coding PRE-MRNA PROCESSING FACTOR 18A (PRP18A) PRE-MRNA PROCESSING FACTOR 18A (PRP18A)
AT1G03150	42.9643	17.5174	1.29686	8.74644	5.87508e-08	2.06695e-06	Acyl-CoA N-acyltransferases (NAT) superfamily protein;(source:Araport11) protein_coding NATB CATALYTIC SUBUNIT (NAA20) NATB CATALYTIC SUBUNIT (NAA20)	AT1G03150	17.5607	14.985	0.253552	1.46532	0.1598	0.30355	Acyl-CoA N-acyltransferases (NAT) superfamily protein;(source:Araport11) protein_coding NATB CATALYTIC SUBUNIT (NAA20) NATB CATALYTIC SUBUNIT (NAA20)	AT1G03150	36.6938	17.5174	1.07219	7.11159	1.13992e-06	5.24894e-05	Acyl-CoA N-acyltransferases (NAT) superfamily protein;(source:Araport11) protein_coding NATB CATALYTIC SUBUNIT (NAA20) NATB CATALYTIC SUBUNIT (NAA20)	AT1G03150	13.0898	14.985	-0.177849	-0.975805	0.341881	0.459371	Acyl-CoA N-acyltransferases (NAT) superfamily protein;(source:Araport11) protein_coding NATB CATALYTIC SUBUNIT (NAA20) NATB CATALYTIC SUBUNIT (NAA20)
AT1G03160	92.5392	107.784	-0.216944	-1.71129	0.10392	0.183474	A new plant-specific member of the dynamin superfamily; defines a new protein class within the dynamin superfamily of membrane remodeling GTPases that regulates organization of the thylakoid network in plants. Targeted to chloroplasts and associated with thylakoid and envelope membranes as punctate structures. Knockout mutants have abnormalities in chloroplast and thylakoid morphology, including …	AT1G03160	57.5219	131.921	-1.19517	-9.31455	2.27039e-08	4.24686e-06	A new plant-specific member of the dynamin superfamily; defines a new protein class within the dynamin superfamily of membrane remodeling GTPases that regulates organization of the thylakoid network in plants. Targeted to chloroplasts and associated with thylakoid and envelope membranes as punctate structures. Knockout mutants have abnormalities in chloroplast and thylakoid morphology, including …	AT1G03160	114.06	107.784	0.0833986	0.657671	0.518935	0.681703	A new plant-specific member of the dynamin superfamily; defines a new protein class within the dynamin superfamily of membrane remodeling GTPases that regulates organization of the thylakoid network in plants. Targeted to chloroplasts and associated with thylakoid and envelope membranes as punctate structures. Knockout mutants have abnormalities in chloroplast and thylakoid morphology, including …	AT1G03160	60.5943	131.921	-1.12653	-8.79499	5.4082e-08	2.04846e-06	A new plant-specific member of the dynamin superfamily; defines a new protein class within the dynamin superfamily of membrane remodeling GTPases that regulates organization of the thylakoid network in plants. Targeted to chloroplasts and associated with thylakoid and envelope membranes as punctate structures. Knockout mutants have abnormalities in chloroplast and thylakoid morphology, including …
AT1G03165	1.02515	2.0594	-1.13978	-1.85372	0.0799662	0.149798	hypothetical protein;(source:Araport11) protein_coding	AT1G03165	0.382356	1.39957	-2.1085	-2.25516	0.0365901	0.107208	hypothetical protein;(source:Araport11) protein_coding	AT1G03165	0.709361	2.0594	-1.76086	-2.37308	0.0287803	0.103166	hypothetical protein;(source:Araport11) protein_coding	AT1G03165	0.654629	1.39957	-1.18903	-1.44297	0.165923	0.261127	hypothetical protein;(source:Araport11) protein_coding
AT1G03170	2.10291	1.65941	0.59873	0.898106	0.38079	0.502111	A member of the FAF family proteins encoded by the FANTASTIC FOUR (FAF) genes: AT4G02810 (FAF1), AT1G03170 (FAF2), AT5G19260 (FAF3) and AT3G06020 (FAF4). FAFs have the potential to regulate shoot meristem size in Arabidopsis thaliana. FAFs can repress WUS, which ultimately leads to an arrest of meristem activity in FAF overexpressing lines. protein_coding FANTASTIC FOUR 2 (FAF2) FANTASTIC FOUR 2 …	AT1G03170	1.32106	1.7205	-0.46357	-0.606501	0.551631	0.697126	A member of the FAF family proteins encoded by the FANTASTIC FOUR (FAF) genes: AT4G02810 (FAF1), AT1G03170 (FAF2), AT5G19260 (FAF3) and AT3G06020 (FAF4). FAFs have the potential to regulate shoot meristem size in Arabidopsis thaliana. FAFs can repress WUS, which ultimately leads to an arrest of meristem activity in FAF overexpressing lines. protein_coding FANTASTIC FOUR 2 (FAF2) FANTASTIC FOUR 2 …	AT1G03170	3.05382	1.65941	1.27843	1.96318	0.065002	0.17812	A member of the FAF family proteins encoded by the FANTASTIC FOUR (FAF) genes: AT4G02810 (FAF1), AT1G03170 (FAF2), AT5G19260 (FAF3) and AT3G06020 (FAF4). FAFs have the potential to regulate shoot meristem size in Arabidopsis thaliana. FAFs can repress WUS, which ultimately leads to an arrest of meristem activity in FAF overexpressing lines. protein_coding FANTASTIC FOUR 2 (FAF2) FANTASTIC FOUR 2 …	AT1G03170	0.81117	1.7205	-1.26205	-1.42048	0.172277	0.269243	A member of the FAF family proteins encoded by the FANTASTIC FOUR (FAF) genes: AT4G02810 (FAF1), AT1G03170 (FAF2), AT5G19260 (FAF3) and AT3G06020 (FAF4). FAFs have the potential to regulate shoot meristem size in Arabidopsis thaliana. FAFs can repress WUS, which ultimately leads to an arrest of meristem activity in FAF overexpressing lines. protein_coding FANTASTIC FOUR 2 (FAF2) FANTASTIC FOUR 2 …
AT1G03180	0.407106	0.769301	-0.266664	-0.256862	0.80015	0.860557	Functions in chromosome axis remodeling and synapsis along with co factors PCH2 and ASY1.Required for chiasma formation. protein_coding (COMET) (COMET)	AT1G03180	0.39071	0.495405	-0.676056	-0.551748	0.587794	0.725599	Functions in chromosome axis remodeling and synapsis along with co factors PCH2 and ASY1.Required for chiasma formation. protein_coding (COMET) (COMET)	AT1G03180	0.236199	0.769301	-1.8353	-1.33526	0.198158	0.370023	Functions in chromosome axis remodeling and synapsis along with co factors PCH2 and ASY1.Required for chiasma formation. protein_coding (COMET) (COMET)	AT1G03180	1.14899	0.495405	1.33673	1.3429	0.195721	0.297493	Functions in chromosome axis remodeling and synapsis along with co factors PCH2 and ASY1.Required for chiasma formation. protein_coding (COMET) (COMET)
AT1G03190	9.86379	11.8599	-0.252922	-1.41529	0.173773	0.274134	UV damage and heat induce a common stress response in plants that leads to tissue death and reduced chloroplast function. The UVH6 product is suggested to be a negative regulator of this response. protein_coding ULTRAVIOLET HYPERSENSITIVE 6 (UVH6) ARABIDOPSIS THALIANA XERODERMA PIGMENTOSUM GROUP D (ATXPD);ULTRAVIOLET HYPERSENSITIVE 6 (UVH6)	AT1G03190	8.46147	9.17872	-0.116101	-0.542591	0.593957	0.730284	UV damage and heat induce a common stress response in plants that leads to tissue death and reduced chloroplast function. The UVH6 product is suggested to be a negative regulator of this response. protein_coding ULTRAVIOLET HYPERSENSITIVE 6 (UVH6) ARABIDOPSIS THALIANA XERODERMA PIGMENTOSUM GROUP D (ATXPD);ULTRAVIOLET HYPERSENSITIVE 6 (UVH6)	AT1G03190	14.4761	11.8599	0.305386	1.74232	0.0982291	0.234847	UV damage and heat induce a common stress response in plants that leads to tissue death and reduced chloroplast function. The UVH6 product is suggested to be a negative regulator of this response. protein_coding ULTRAVIOLET HYPERSENSITIVE 6 (UVH6) ARABIDOPSIS THALIANA XERODERMA PIGMENTOSUM GROUP D (ATXPD);ULTRAVIOLET HYPERSENSITIVE 6 (UVH6)	AT1G03190	10.5045	9.17872	0.198093	0.955569	0.35174	0.469529	UV damage and heat induce a common stress response in plants that leads to tissue death and reduced chloroplast function. The UVH6 product is suggested to be a negative regulator of this response. protein_coding ULTRAVIOLET HYPERSENSITIVE 6 (UVH6) ARABIDOPSIS THALIANA XERODERMA PIGMENTOSUM GROUP D (ATXPD);ULTRAVIOLET HYPERSENSITIVE 6 (UVH6)
AT1G03200	2.40438	1.80822	0.282547	0.523804	0.606699	0.705459	hypothetical protein;(source:Araport11) protein_coding	AT1G03200	0.101552	0.449492	-2.57605	-1.5963	0.12754	0.258863	hypothetical protein;(source:Araport11) protein_coding	AT1G03200	1.48374	1.80822	-0.393873	-0.640256	0.52994	0.690668	hypothetical protein;(source:Araport11) protein_coding	AT1G03200	0.278604	0.449492	-1.29669	-0.960623	0.34926	0.467214	hypothetical protein;(source:Araport11) protein_coding
AT1G03210	5.83321	5.60226	0.0502739	0.154605	0.878825	0.917096	Phenazine biosynthesis PhzC/PhzF protein;(source:Araport11) protein_coding	AT1G03210	12.7457	5.09192	1.271	3.86232	0.0011117	0.00849693	Phenazine biosynthesis PhzC/PhzF protein;(source:Araport11) protein_coding	AT1G03210	4.9037	5.60226	-0.168849	-0.481778	0.635673	0.770399	Phenazine biosynthesis PhzC/PhzF protein;(source:Araport11) protein_coding	AT1G03210	22.3323	5.09192	2.10171	6.66249	2.7404e-06	3.47221e-05	Phenazine biosynthesis PhzC/PhzF protein;(source:Araport11) protein_coding
AT1G03220	17.2623	30.5665	-0.921936	-2.52586	0.020963	0.0522047	Eukaryotic aspartyl protease family protein;(source:Araport11) protein_coding SECRETED ASPARTIC PROTEASE 2 (SAP2) SECRETED ASPARTIC PROTEASE 2 (SAP2)	AT1G03220	34.4547	28.3459	0.218821	0.607182	0.551188	0.696755	Eukaryotic aspartyl protease family protein;(source:Araport11) protein_coding SECRETED ASPARTIC PROTEASE 2 (SAP2) SECRETED ASPARTIC PROTEASE 2 (SAP2)	AT1G03220	34.3855	30.5665	0.158043	0.454444	0.654852	0.784147	Eukaryotic aspartyl protease family protein;(source:Araport11) protein_coding SECRETED ASPARTIC PROTEASE 2 (SAP2) SECRETED ASPARTIC PROTEASE 2 (SAP2)	AT1G03220	9.93606	28.3459	-1.53145	-3.43846	0.00287412	0.009473	Eukaryotic aspartyl protease family protein;(source:Araport11) protein_coding SECRETED ASPARTIC PROTEASE 2 (SAP2) SECRETED ASPARTIC PROTEASE 2 (SAP2)
AT1G03230	10.6478	10.4051	0.0277068	0.102715	0.919306	0.946434	Eukaryotic aspartyl protease family protein;(source:Araport11) protein_coding SECRETED ASPARTIC PROTEASE 1 (SAP1) SECRETED ASPARTIC PROTEASE 1 (SAP1)	AT1G03230	21.1224	17.818	0.248288	1.04586	0.309239	0.478201	Eukaryotic aspartyl protease family protein;(source:Araport11) protein_coding SECRETED ASPARTIC PROTEASE 1 (SAP1) SECRETED ASPARTIC PROTEASE 1 (SAP1)	AT1G03230	19.1762	10.4051	0.847146	3.26026	0.004273	0.026846	Eukaryotic aspartyl protease family protein;(source:Araport11) protein_coding SECRETED ASPARTIC PROTEASE 1 (SAP1) SECRETED ASPARTIC PROTEASE 1 (SAP1)	AT1G03230	11.6398	17.818	-0.695571	-2.616	0.0173393	0.0418815	Eukaryotic aspartyl protease family protein;(source:Araport11) protein_coding SECRETED ASPARTIC PROTEASE 1 (SAP1) SECRETED ASPARTIC PROTEASE 1 (SAP1)
AT1G03250	14.6602	11.943	0.319006	1.29075	0.212856	0.321096	R3H domain protein involved in ribosome biogenesis. protein_coding	AT1G03250	32.6953	19.3449	0.796405	3.63836	0.0018377	0.0121653	R3H domain protein involved in ribosome biogenesis. protein_coding	AT1G03250	13.3476	11.943	0.161261	0.626925	0.53845	0.69678	R3H domain protein involved in ribosome biogenesis. protein_coding	AT1G03250	16.119	19.3449	-0.219042	-0.91763	0.370745	0.489163	R3H domain protein involved in ribosome biogenesis. protein_coding
AT1G03260	8.56818	3.76903	1.17088	3.18774	0.00501739	0.0167366	SNARE associated Golgi protein family;(source:Araport11) protein_coding	AT1G03260	10.8334	6.82014	0.674381	2.15668	0.044564	0.123412	SNARE associated Golgi protein family;(source:Araport11) protein_coding	AT1G03260	9.95254	3.76903	1.41267	3.826	0.00120617	0.0107243	SNARE associated Golgi protein family;(source:Araport11) protein_coding	AT1G03260	8.91781	6.82014	0.40913	1.26278	0.222519	0.329871	SNARE associated Golgi protein family;(source:Araport11) protein_coding
AT1G03270	13.673	5.8831	1.19888	2.88756	0.0096866	0.0281793	CBS domain protein with a domain protein (DUF21);(source:Araport11) protein_coding	AT1G03270	5.00424	2.87429	0.811968	1.29406	0.211733	0.368674	CBS domain protein with a domain protein (DUF21);(source:Araport11) protein_coding	AT1G03270	7.61594	5.8831	0.493532	1.10037	0.285431	0.467637	CBS domain protein with a domain protein (DUF21);(source:Araport11) protein_coding	AT1G03270	0.774093	2.87429	-1.89711	-1.82579	0.0842414	0.152075	CBS domain protein with a domain protein (DUF21);(source:Araport11) protein_coding
AT1G03280	16.8475	74.8847	-2.12971	-12.9419	1.18346e-10	1.81312e-08	Transcription factor TFIIE, alpha subunit;(source:Araport11) protein_coding	AT1G03280	56.5312	34.4232	0.713044	4.34452	0.000377127	0.00380509	Transcription factor TFIIE, alpha subunit;(source:Araport11) protein_coding	AT1G03280	22.4063	74.8847	-1.72208	-10.5177	3.42933e-09	6.82859e-07	Transcription factor TFIIE, alpha subunit;(source:Araport11) protein_coding	AT1G03280	48.2305	34.4232	0.48391	2.92321	0.00896467	0.0243592	Transcription factor TFIIE, alpha subunit;(source:Araport11) protein_coding
AT1G03290	44.7077	53.8382	-0.259094	-1.2615	0.22297	0.333037	ELKS/Rab6-interacting/CAST family protein;(source:Araport11) protein_coding	AT1G03290	52.111	32.837	0.716609	3.22966	0.00457283	0.0237961	ELKS/Rab6-interacting/CAST family protein;(source:Araport11) protein_coding	AT1G03290	42.981	53.8382	-0.310903	-1.49351	0.152342	0.312792	ELKS/Rab6-interacting/CAST family protein;(source:Araport11) protein_coding	AT1G03290	118.226	32.837	1.88722	8.64292	7.01616e-08	2.44097e-06	ELKS/Rab6-interacting/CAST family protein;(source:Araport11) protein_coding
AT1G03300	3.13984	8.80679	-1.51823	-5.16246	6.20976e-05	0.000493196	Member of the plant-specific DUF724 protein family. Arabidopsis has 10 DUF724 proteins. Loss of function mutant has a WT phenotype protein_coding DOMAIN OF UNKNOWN FUNCTION 724 1 (ATDUF1) DOMAIN OF UNKNOWN FUNCTION 724 1 (ATDUF1);DOMAIN OF UNKNOWN FUNCTION 724 1 (DUF1)	AT1G03300	6.06426	5.15013	0.211989	0.66916	0.511745	0.665524	Member of the plant-specific DUF724 protein family. Arabidopsis has 10 DUF724 proteins. Loss of function mutant has a WT phenotype protein_coding DOMAIN OF UNKNOWN FUNCTION 724 1 (ATDUF1) DOMAIN OF UNKNOWN FUNCTION 724 1 (ATDUF1);DOMAIN OF UNKNOWN FUNCTION 724 1 (DUF1)	AT1G03300	6.18363	8.80679	-0.567768	-2.17221	0.0432091	0.136569	Member of the plant-specific DUF724 protein family. Arabidopsis has 10 DUF724 proteins. Loss of function mutant has a WT phenotype protein_coding DOMAIN OF UNKNOWN FUNCTION 724 1 (ATDUF1) DOMAIN OF UNKNOWN FUNCTION 724 1 (ATDUF1);DOMAIN OF UNKNOWN FUNCTION 724 1 (DUF1)	AT1G03300	1.55683	5.15013	-1.71805	-3.59496	0.00202538	0.00712295	Member of the plant-specific DUF724 protein family. Arabidopsis has 10 DUF724 proteins. Loss of function mutant has a WT phenotype protein_coding DOMAIN OF UNKNOWN FUNCTION 724 1 (ATDUF1) DOMAIN OF UNKNOWN FUNCTION 724 1 (ATDUF1);DOMAIN OF UNKNOWN FUNCTION 724 1 (DUF1)
AT1G03310	29.0853	44.5844	-0.952326	-2.53433	0.0205941	0.0515113	Encodes a protein with strong similarity to isoamylase (EC:3.2.1.68) however lacks critical residues known to be important for activity. Appears to co localize with ISA1 in the chloroplast isoamylase complex. Mutations in this gene cause the loss of detectable isoamylase activity and the disruption of normal starch structure. It has been postulated that AtISA2 interacts with AtISA1 to form the Is…	AT1G03310	72.637	122.315	-0.757623	-2.17904	0.0426247	0.119592	Encodes a protein with strong similarity to isoamylase (EC:3.2.1.68) however lacks critical residues known to be important for activity. Appears to co localize with ISA1 in the chloroplast isoamylase complex. Mutations in this gene cause the loss of detectable isoamylase activity and the disruption of normal starch structure. It has been postulated that AtISA2 interacts with AtISA1 to form the Is…	AT1G03310	41.1612	44.5844	-0.11219	-0.305874	0.763152	0.859945	Encodes a protein with strong similarity to isoamylase (EC:3.2.1.68) however lacks critical residues known to be important for activity. Appears to co localize with ISA1 in the chloroplast isoamylase complex. Mutations in this gene cause the loss of detectable isoamylase activity and the disruption of normal starch structure. It has been postulated that AtISA2 interacts with AtISA1 to form the Is…	AT1G03310	27.931	122.315	-2.13157	-5.69023	2.00661e-05	0.00016688	Encodes a protein with strong similarity to isoamylase (EC:3.2.1.68) however lacks critical residues known to be important for activity. Appears to co localize with ISA1 in the chloroplast isoamylase complex. Mutations in this gene cause the loss of detectable isoamylase activity and the disruption of normal starch structure. It has been postulated that AtISA2 interacts with AtISA1 to form the Is…
AT1G03330	20.1558	13.0052	0.623971	3.41878	0.00300317	0.0111702	Small nuclear ribonucleoprotein family protein;(source:Araport11) protein_coding SM-LIKE 2 (LSM2) SM-LIKE 2 (LSM2)	AT1G03330	9.82735	5.63151	0.790176	2.90715	0.00928335	0.0399975	Small nuclear ribonucleoprotein family protein;(source:Araport11) protein_coding SM-LIKE 2 (LSM2) SM-LIKE 2 (LSM2)	AT1G03330	13.5555	13.0052	0.0690376	0.353562	0.727707	0.835776	Small nuclear ribonucleoprotein family protein;(source:Araport11) protein_coding SM-LIKE 2 (LSM2) SM-LIKE 2 (LSM2)	AT1G03330	9.85857	5.63151	0.792803	2.90567	0.00931312	0.0250991	Small nuclear ribonucleoprotein family protein;(source:Araport11) protein_coding SM-LIKE 2 (LSM2) SM-LIKE 2 (LSM2)
AT1G03340	2.99669	2.29914	0.454043	1.09568	0.287427	0.405885	hypothetical protein;(source:Araport11) protein_coding	AT1G03340	4.11433	2.41713	0.762552	1.82079	0.0850263	0.195089	hypothetical protein;(source:Araport11) protein_coding	AT1G03340	4.32786	2.29914	0.900094	2.2111	0.0399792	0.12952	hypothetical protein;(source:Araport11) protein_coding	AT1G03340	5.07664	2.41713	1.0416	2.54409	0.020177	0.0473535	hypothetical protein;(source:Araport11) protein_coding
AT1G03350	34.2943	55.1582	-0.682675	-4.18862	0.000534531	0.00281453	BSD domain-containing protein;(source:Araport11) protein_coding	AT1G03350	36.3378	49.1399	-0.432727	-2.54309	0.020219	0.0701615	BSD domain-containing protein;(source:Araport11) protein_coding	AT1G03350	38.3211	55.1582	-0.569732	-3.4562	0.00276253	0.0197038	BSD domain-containing protein;(source:Araport11) protein_coding	AT1G03350	61.0478	49.1399	0.311284	1.8887	0.0748837	0.138345	BSD domain-containing protein;(source:Araport11) protein_coding
AT1G03360	5.5553	1.70398	1.74633	4.13663	0.00060059	0.00308034	Encodes a core subunit of the RNA exosome required for the processing of rRNA, several snoRNA and the degradation of aberrant transcripts. protein_coding RIBOSOMAL RNA PROCESSING 4 (RRP4) SUPPRESSOR OF PAS2 2 (SOP2);RIBOSOMAL RNA PROCESSING 4 (RRP4);RIBOSOMAL RNA PROCESSING 4 (ATRRP4)	AT1G03360	6.63345	2.29757	1.54625	3.94873	0.00091561	0.00736324	Encodes a core subunit of the RNA exosome required for the processing of rRNA, several snoRNA and the degradation of aberrant transcripts. protein_coding RIBOSOMAL RNA PROCESSING 4 (RRP4) SUPPRESSOR OF PAS2 2 (SOP2);RIBOSOMAL RNA PROCESSING 4 (RRP4);RIBOSOMAL RNA PROCESSING 4 (ATRRP4)	AT1G03360	2.29247	1.70398	0.493106	1.03207	0.315484	0.497942	Encodes a core subunit of the RNA exosome required for the processing of rRNA, several snoRNA and the degradation of aberrant transcripts. protein_coding RIBOSOMAL RNA PROCESSING 4 (RRP4) SUPPRESSOR OF PAS2 2 (SOP2);RIBOSOMAL RNA PROCESSING 4 (RRP4);RIBOSOMAL RNA PROCESSING 4 (ATRRP4)	AT1G03360	5.24678	2.29757	1.18263	2.92858	0.00886056	0.0241531	Encodes a core subunit of the RNA exosome required for the processing of rRNA, several snoRNA and the degradation of aberrant transcripts. protein_coding RIBOSOMAL RNA PROCESSING 4 (RRP4) SUPPRESSOR OF PAS2 2 (SOP2);RIBOSOMAL RNA PROCESSING 4 (RRP4);RIBOSOMAL RNA PROCESSING 4 (ATRRP4)
AT1G03365	25.9172	37.691	-0.539758	-3.80855	0.00125435	0.00552141	RING/U-box superfamily protein;(source:Araport11) protein_coding	AT1G03365	24.4834	25.5396	-0.0474086	-0.299713	0.767773	0.857969	RING/U-box superfamily protein;(source:Araport11) protein_coding	AT1G03365	26.5888	37.691	-0.501548	-3.46439	0.00271246	0.0193999	RING/U-box superfamily protein;(source:Araport11) protein_coding	AT1G03365	24.0482	25.5396	-0.0692313	-0.435136	0.668551	0.761539	RING/U-box superfamily protein;(source:Araport11) protein_coding
AT1G03370	27.012	48.2283	-0.84396	-4.30414	0.000412743	0.00228468	C2 calcium/lipid-binding and GRAM domain containing protein;(source:Araport11) protein_coding	AT1G03370	81.1688	72.8236	0.196482	1.04947	0.307622	0.476605	C2 calcium/lipid-binding and GRAM domain containing protein;(source:Araport11) protein_coding	AT1G03370	37.7649	48.2283	-0.35936	-1.84182	0.0817639	0.207834	C2 calcium/lipid-binding and GRAM domain containing protein;(source:Araport11) protein_coding	AT1G03370	172.362	72.8236	1.28027	6.81093	2.04448e-06	2.77928e-05	C2 calcium/lipid-binding and GRAM domain containing protein;(source:Araport11) protein_coding
AT1G03380	127.251	211.385	-0.736558	-5.16315	6.20046e-05	0.000492758	yeast autophagy 18 G-like protein;(source:Araport11) protein_coding HOMOLOG OF YEAST AUTOPHAGY 18 (ATG18) G (ATG18G) HOMOLOG OF YEAST AUTOPHAGY 18 (ATG18) G (ATG18G);HOMOLOG OF YEAST AUTOPHAGY 18 (ATG18) G (ATATG18G)	AT1G03380	69.3118	68.6386	0.0194048	0.135831	0.893437	0.936392	yeast autophagy 18 G-like protein;(source:Araport11) protein_coding HOMOLOG OF YEAST AUTOPHAGY 18 (ATG18) G (ATG18G) HOMOLOG OF YEAST AUTOPHAGY 18 (ATG18) G (ATG18G);HOMOLOG OF YEAST AUTOPHAGY 18 (ATG18) G (ATATG18G)	AT1G03380	199.383	211.385	-0.0872227	-0.607169	0.551197	0.707138	yeast autophagy 18 G-like protein;(source:Araport11) protein_coding HOMOLOG OF YEAST AUTOPHAGY 18 (ATG18) G (ATG18G) HOMOLOG OF YEAST AUTOPHAGY 18 (ATG18) G (ATG18G);HOMOLOG OF YEAST AUTOPHAGY 18 (ATG18) G (ATATG18G)	AT1G03380	58.7899	68.6386	-0.235813	-1.63893	0.118301	0.199669	yeast autophagy 18 G-like protein;(source:Araport11) protein_coding HOMOLOG OF YEAST AUTOPHAGY 18 (ATG18) G (ATG18G) HOMOLOG OF YEAST AUTOPHAGY 18 (ATG18) G (ATG18G);HOMOLOG OF YEAST AUTOPHAGY 18 (ATG18) G (ATATG18G)
AT1G03400	29.4989	29.829	0.0481756	0.173954	0.863811	0.906705	A single copy gene that encodes a protein with sequence similarity to tomato E8 (ACC oxidase, the last step in ethylene biosynthesis) involved in ethylene synthesis and fruit ripening in tomato. This gene is not induced by ethylene in siliques. The transcript is found in siliques, etiolated seedlings, leaves, stems and flowers. protein_coding	AT1G03400	37.3199	41.8683	-0.0837775	-0.306034	0.763032	0.854601	A single copy gene that encodes a protein with sequence similarity to tomato E8 (ACC oxidase, the last step in ethylene biosynthesis) involved in ethylene synthesis and fruit ripening in tomato. This gene is not induced by ethylene in siliques. The transcript is found in siliques, etiolated seedlings, leaves, stems and flowers. protein_coding	AT1G03400	35.5906	29.829	0.320279	1.15109	0.264509	0.445281	A single copy gene that encodes a protein with sequence similarity to tomato E8 (ACC oxidase, the last step in ethylene biosynthesis) involved in ethylene synthesis and fruit ripening in tomato. This gene is not induced by ethylene in siliques. The transcript is found in siliques, etiolated seedlings, leaves, stems and flowers. protein_coding	AT1G03400	61.1057	41.8683	0.630805	2.37075	0.0289182	0.0637136	A single copy gene that encodes a protein with sequence similarity to tomato E8 (ACC oxidase, the last step in ethylene biosynthesis) involved in ethylene synthesis and fruit ripening in tomato. This gene is not induced by ethylene in siliques. The transcript is found in siliques, etiolated seedlings, leaves, stems and flowers. protein_coding
AT1G03410	42.6454	24.2992	0.836013	4.64735	0.000192232	0.00121844	2-oxoglutarate (2OG) and Fe(II)-dependent oxygenase superfamily protein;(source:Araport11) protein_coding (2A6) (2A6)	AT1G03410	20.6832	24.61	-0.266484	-1.3356	0.198051	0.352615	2-oxoglutarate (2OG) and Fe(II)-dependent oxygenase superfamily protein;(source:Araport11) protein_coding (2A6) (2A6)	AT1G03410	48.6044	24.2992	1.03283	5.71451	1.90647e-05	0.000478836	2-oxoglutarate (2OG) and Fe(II)-dependent oxygenase superfamily protein;(source:Araport11) protein_coding (2A6) (2A6)	AT1G03410	25.2228	24.61	0.031833	0.163224	0.872131	0.913409	2-oxoglutarate (2OG) and Fe(II)-dependent oxygenase superfamily protein;(source:Araport11) protein_coding (2A6) (2A6)
AT1G03430	17.2888	14.2917	0.27713	1.18167	0.252463	0.36654	Encodes AHP5, one of the six Arabidopsis thaliana histidine phosphotransfer proteins (AHPs). AHPs function as redundant positive regulators of cytokinin signaling. Members of the AHP gene family include: AT3G21510 (AHP1), AT3G29350 (AHP2), AT5G39340 (AHP3), AT3G16360 (AHP4), AT1G03430 (AHP5) and AT1G80100 (AHP6). protein_coding HISTIDINE-CONTAINING PHOSPHOTRANSFER FACTOR 5 (AHP5) HISTIDINE-CONTAI…	AT1G03430	20.9286	18.7892	0.173579	0.741987	0.46751	0.628037	Encodes AHP5, one of the six Arabidopsis thaliana histidine phosphotransfer proteins (AHPs). AHPs function as redundant positive regulators of cytokinin signaling. Members of the AHP gene family include: AT3G21510 (AHP1), AT3G29350 (AHP2), AT5G39340 (AHP3), AT3G16360 (AHP4), AT1G03430 (AHP5) and AT1G80100 (AHP6). protein_coding HISTIDINE-CONTAINING PHOSPHOTRANSFER FACTOR 5 (AHP5) HISTIDINE-CONTAI…	AT1G03430	14.5604	14.2917	0.00880742	0.0357364	0.971879	0.98419	Encodes AHP5, one of the six Arabidopsis thaliana histidine phosphotransfer proteins (AHPs). AHPs function as redundant positive regulators of cytokinin signaling. Members of the AHP gene family include: AT3G21510 (AHP1), AT3G29350 (AHP2), AT5G39340 (AHP3), AT3G16360 (AHP4), AT1G03430 (AHP5) and AT1G80100 (AHP6). protein_coding HISTIDINE-CONTAINING PHOSPHOTRANSFER FACTOR 5 (AHP5) HISTIDINE-CONTAI…	AT1G03430	31.8331	18.7892	0.793478	3.53084	0.00233805	0.00801698	Encodes AHP5, one of the six Arabidopsis thaliana histidine phosphotransfer proteins (AHPs). AHPs function as redundant positive regulators of cytokinin signaling. Members of the AHP gene family include: AT3G21510 (AHP1), AT3G29350 (AHP2), AT5G39340 (AHP3), AT3G16360 (AHP4), AT1G03430 (AHP5) and AT1G80100 (AHP6). protein_coding HISTIDINE-CONTAINING PHOSPHOTRANSFER FACTOR 5 (AHP5) HISTIDINE-CONTAI…
AT1G03440	18.4329	17.6138	0.061372	0.198787	0.844621	0.892809	Leucine-rich repeat (LRR) family protein;(source:Araport11) protein_coding	AT1G03440	20.4517	19.7223	0.0800151	0.252056	0.803806	0.881919	Leucine-rich repeat (LRR) family protein;(source:Araport11) protein_coding	AT1G03440	24.0241	17.6138	0.415764	1.34881	0.193848	0.364631	Leucine-rich repeat (LRR) family protein;(source:Araport11) protein_coding	AT1G03440	12.3536	19.7223	-0.648827	-1.86957	0.077626	0.142446	Leucine-rich repeat (LRR) family protein;(source:Araport11) protein_coding
AT1G03457	2.41098	2.3849	-0.163342	-0.263498	0.79511	0.857013	RNA-binding (RRM/RBD/RNP motifs) family protein;(source:Araport11) protein_coding BRUNO-LIKE 2 (BRN2) (ATBRN2);BRUNO-LIKE 2 (BRN2)	AT1G03457	0.56578	1.0724	-1.12972	-0.999235	0.330708	0.500645	RNA-binding (RRM/RBD/RNP motifs) family protein;(source:Araport11) protein_coding BRUNO-LIKE 2 (BRN2) (ATBRN2);BRUNO-LIKE 2 (BRN2)	AT1G03457	1.20287	2.3849	-1.06768	-1.42978	0.169628	0.336231	RNA-binding (RRM/RBD/RNP motifs) family protein;(source:Araport11) protein_coding BRUNO-LIKE 2 (BRN2) (ATBRN2);BRUNO-LIKE 2 (BRN2)	AT1G03457	0.757449	1.0724	-1.16873	-1.01575	0.322988	0.439518	RNA-binding (RRM/RBD/RNP motifs) family protein;(source:Araport11) protein_coding BRUNO-LIKE 2 (BRN2) (ATBRN2);BRUNO-LIKE 2 (BRN2)
AT1G03470	2.57635	12.294	-2.25234	-6.41725	4.47528e-06	6.00979e-05	Encodes a member of the NET superfamily of proteins that potentially couples different membranes to the actin cytoskeleton in plant cells. It colocalizes with filamentous actin and is localized to the nuclear membrane and the vacuolar membrane. protein_coding NETWORKED 3A (NET3A) NETWORKED 3A (NET3A)	AT1G03470	1.56907	1.44506	0.0736592	0.0962079	0.924401	0.954493	Encodes a member of the NET superfamily of proteins that potentially couples different membranes to the actin cytoskeleton in plant cells. It colocalizes with filamentous actin and is localized to the nuclear membrane and the vacuolar membrane. protein_coding NETWORKED 3A (NET3A) NETWORKED 3A (NET3A)	AT1G03470	3.72097	12.294	-1.99624	-5.75059	1.7671e-05	0.00045168	Encodes a member of the NET superfamily of proteins that potentially couples different membranes to the actin cytoskeleton in plant cells. It colocalizes with filamentous actin and is localized to the nuclear membrane and the vacuolar membrane. protein_coding NETWORKED 3A (NET3A) NETWORKED 3A (NET3A)	AT1G03470	2.71533	1.44506	0.874499	1.27584	0.217966	0.324659	Encodes a member of the NET superfamily of proteins that potentially couples different membranes to the actin cytoskeleton in plant cells. It colocalizes with filamentous actin and is localized to the nuclear membrane and the vacuolar membrane. protein_coding NETWORKED 3A (NET3A) NETWORKED 3A (NET3A)
AT1G03475	47.1086	57.9148	-0.30272	-2.148	0.0453375	0.0958861	Encodes coproporphyrinogen III oxidase, a key enzyme in the biosynthetic pathway of chlorophyll and heme, a tetrapyrrole pathway. Mutants express cytological and molecular markers associated with the defense responses, usually activated by pathogen infection. protein_coding LESION INITIATION 2 (LIN2) (ATCPO-I);LESION INITIATION 2 (LIN2); (HEMF1)	AT1G03475	79.8953	147.462	-0.8821	-6.38207	4.8047e-06	0.000162935	Encodes coproporphyrinogen III oxidase, a key enzyme in the biosynthetic pathway of chlorophyll and heme, a tetrapyrrole pathway. Mutants express cytological and molecular markers associated with the defense responses, usually activated by pathogen infection. protein_coding LESION INITIATION 2 (LIN2) (ATCPO-I);LESION INITIATION 2 (LIN2); (HEMF1)	AT1G03475	41.4884	57.9148	-0.479821	-3.34661	0.00352707	0.0233732	Encodes coproporphyrinogen III oxidase, a key enzyme in the biosynthetic pathway of chlorophyll and heme, a tetrapyrrole pathway. Mutants express cytological and molecular markers associated with the defense responses, usually activated by pathogen infection. protein_coding LESION INITIATION 2 (LIN2) (ATCPO-I);LESION INITIATION 2 (LIN2); (HEMF1)	AT1G03475	141.946	147.462	-0.0631911	-0.457499	0.652696	0.748151	Encodes coproporphyrinogen III oxidase, a key enzyme in the biosynthetic pathway of chlorophyll and heme, a tetrapyrrole pathway. Mutants express cytological and molecular markers associated with the defense responses, usually activated by pathogen infection. protein_coding LESION INITIATION 2 (LIN2) (ATCPO-I);LESION INITIATION 2 (LIN2); (HEMF1)
AT1G03510	0.68354	0.369219	0.462036	0.224646	0.824743	0.878071	Tetratricopeptide repeat (TPR)-like superfamily protein;(source:Araport11) protein_coding	AT1G03510	1.53737	1.03832	0.341487	0.292116	0.773483	0.861786	Tetratricopeptide repeat (TPR)-like superfamily protein;(source:Araport11) protein_coding	AT1G03510	0.80819	0.369219	2.53249	1.38329	0.183217	0.352583	Tetratricopeptide repeat (TPR)-like superfamily protein;(source:Araport11) protein_coding	AT1G03510	1.25909	1.03832	0.281708	0.244485	0.809574	0.868716	Tetratricopeptide repeat (TPR)-like superfamily protein;(source:Araport11) protein_coding
AT1G03520	10.6868	15.6852	-0.545411	-2.41183	0.0265733	0.0626231	Core-2/I-branching beta-1,6-N-acetylglucosaminyltransferase family protein;(source:Araport11) protein_coding	AT1G03520	6.47291	7.11302	-0.226099	-0.688854	0.499554	0.654928	Core-2/I-branching beta-1,6-N-acetylglucosaminyltransferase family protein;(source:Araport11) protein_coding	AT1G03520	13.5021	15.6852	-0.261954	-1.15341	0.263583	0.444043	Core-2/I-branching beta-1,6-N-acetylglucosaminyltransferase family protein;(source:Araport11) protein_coding	AT1G03520	4.57967	7.11302	-0.636545	-1.78441	0.090941	0.161525	Core-2/I-branching beta-1,6-N-acetylglucosaminyltransferase family protein;(source:Araport11) protein_coding
AT1G03530	8.2833	14.554	-0.901488	-3.32405	0.00370859	0.0131658	nuclear assembly factor 1;(source:Araport11) protein_coding NUCLEAR ASSEMBLY FACTOR 1 (NAF1) NUCLEAR ASSEMBLY FACTOR 1 (NAF1); (ATNAF1)	AT1G03530	19.9287	13.2634	0.59291	2.27988	0.0348061	0.10358	nuclear assembly factor 1;(source:Araport11) protein_coding NUCLEAR ASSEMBLY FACTOR 1 (NAF1) NUCLEAR ASSEMBLY FACTOR 1 (NAF1); (ATNAF1)	AT1G03530	11.2829	14.554	-0.375247	-1.4223	0.171757	0.338431	nuclear assembly factor 1;(source:Araport11) protein_coding NUCLEAR ASSEMBLY FACTOR 1 (NAF1) NUCLEAR ASSEMBLY FACTOR 1 (NAF1); (ATNAF1)	AT1G03530	21.9004	13.2634	0.716539	2.77429	0.012371	0.0317531	nuclear assembly factor 1;(source:Araport11) protein_coding NUCLEAR ASSEMBLY FACTOR 1 (NAF1) NUCLEAR ASSEMBLY FACTOR 1 (NAF1); (ATNAF1)
AT1G03540	1.89545	1.70973	0.177612	0.156978	0.87698	0.915994	Pentatricopeptide repeat (PPR-like) superfamily protein;(source:Araport11) protein_coding	AT1G03540	2.9807	4.35652	-0.469225	-0.699582	0.492983	0.649077	Pentatricopeptide repeat (PPR-like) superfamily protein;(source:Araport11) protein_coding	AT1G03540	0.893423	1.70973	-0.476936	-0.361825	0.721626	0.83185	Pentatricopeptide repeat (PPR-like) superfamily protein;(source:Araport11) protein_coding	AT1G03540	4.70959	4.35652	0.177795	0.293546	0.772407	0.841962	Pentatricopeptide repeat (PPR-like) superfamily protein;(source:Araport11) protein_coding
AT1G03545	1.24783	0.896719	0.763974	0.820191	0.422659	0.542884	Potential natural antisense gene, locus overlaps with AT1G03550 antisense_long_noncoding_rna	AT1G03545	0.244136	1.22069	-2.45136	-2.04856	0.0551225	0.143874	Potential natural antisense gene, locus overlaps with AT1G03550 antisense_long_noncoding_rna	AT1G03545	0.472507	0.896719	-0.339618	-0.308539	0.761156	0.858591	Potential natural antisense gene, locus overlaps with AT1G03550 antisense_long_noncoding_rna	AT1G03545	1.29826	1.22069	0.132513	0.165485	0.870376	0.912079	Potential natural antisense gene, locus overlaps with AT1G03550 antisense_long_noncoding_rna
AT1G03550	21.1003	18.1119	0.209755	1.00505	0.327975	0.448741	Secretory carrier membrane protein (SCAMP) family protein;(source:Araport11) protein_coding SECRETORY CARRIER MEMBRANE PROTEIN 4 (SCAMP4) (ATSCAMP4);SECRETORY CARRIER MEMBRANE PROTEIN 4 (SCAMP4)	AT1G03550	4.07714	5.17948	-0.337061	-0.84037	0.411544	0.578545	Secretory carrier membrane protein (SCAMP) family protein;(source:Araport11) protein_coding SECRETORY CARRIER MEMBRANE PROTEIN 4 (SCAMP4) (ATSCAMP4);SECRETORY CARRIER MEMBRANE PROTEIN 4 (SCAMP4)	AT1G03550	29.7266	18.1119	0.731115	3.53203	0.0023318	0.0174324	Secretory carrier membrane protein (SCAMP) family protein;(source:Araport11) protein_coding SECRETORY CARRIER MEMBRANE PROTEIN 4 (SCAMP4) (ATSCAMP4);SECRETORY CARRIER MEMBRANE PROTEIN 4 (SCAMP4)	AT1G03550	9.2547	5.17948	0.801158	2.30117	0.0333345	0.071695	Secretory carrier membrane protein (SCAMP) family protein;(source:Araport11) protein_coding SECRETORY CARRIER MEMBRANE PROTEIN 4 (SCAMP4) (ATSCAMP4);SECRETORY CARRIER MEMBRANE PROTEIN 4 (SCAMP4)
AT1G03560	2.03269	10.0346	-2.37292	-8.39612	1.0771e-07	3.30645e-06	Pentatricopeptide repeat (PPR-like) superfamily protein;(source:Araport11) protein_coding	AT1G03560	16.6842	15.4659	0.118373	0.693899	0.496458	0.651961	Pentatricopeptide repeat (PPR-like) superfamily protein;(source:Araport11) protein_coding	AT1G03560	1.9337	10.0346	-2.38652	-7.6769	3.92839e-07	2.29201e-05	Pentatricopeptide repeat (PPR-like) superfamily protein;(source:Araport11) protein_coding	AT1G03560	8.19174	15.4659	-0.917731	-4.63795	0.000196276	0.00103823	Pentatricopeptide repeat (PPR-like) superfamily protein;(source:Araport11) protein_coding
AT1G03590	34.0413	36.4676	-0.140786	-0.675909	0.507549	0.620789	Protein phosphatase 2C family protein;(source:Araport11) protein_coding	AT1G03590	13.8039	9.99135	0.472255	1.52717	0.143812	0.282792	Protein phosphatase 2C family protein;(source:Araport11) protein_coding	AT1G03590	28.2619	36.4676	-0.370012	-1.71961	0.102367	0.241635	Protein phosphatase 2C family protein;(source:Araport11) protein_coding	AT1G03590	13.9579	9.99135	0.514862	1.6609	0.113765	0.193526	Protein phosphatase 2C family protein;(source:Araport11) protein_coding
AT1G03600	25.6992	75.1681	-1.56103	-4.48058	0.000278418	0.00166104	PSB27 is a chloroplast lumen localized protein that is involved in adaptation to changes in light intensity. protein_coding (PSB27) (PSB27)	AT1G03600	122.104	218.51	-0.832678	-2.4802	0.0230607	0.076894	PSB27 is a chloroplast lumen localized protein that is involved in adaptation to changes in light intensity. protein_coding (PSB27) (PSB27)	AT1G03600	57.4872	75.1681	-0.499287	-1.47564	0.157034	0.319493	PSB27 is a chloroplast lumen localized protein that is involved in adaptation to changes in light intensity. protein_coding (PSB27) (PSB27)	AT1G03600	41.0556	218.51	-2.5714	-7.32043	7.65194e-07	1.37127e-05	PSB27 is a chloroplast lumen localized protein that is involved in adaptation to changes in light intensity. protein_coding (PSB27) (PSB27)
AT1G03610	60.212	52.1192	0.199856	1.10871	0.281912	0.399991	plant/protein (DUF789);(source:Araport11) protein_coding	AT1G03610	29.8798	18.304	0.703038	3.15383	0.00540761	0.0269049	plant/protein (DUF789);(source:Araport11) protein_coding	AT1G03610	56.2377	52.1192	0.0811326	0.446182	0.660699	0.788699	plant/protein (DUF789);(source:Araport11) protein_coding	AT1G03610	11.7734	18.304	-0.610174	-2.38933	0.0278346	0.0617972	plant/protein (DUF789);(source:Araport11) protein_coding
AT1G03620	1.3133	1.2881	-0.00897321	-0.0135292	0.989352	0.993047	ELMO/CED-12 family protein;(source:Araport11) protein_coding	AT1G03620	0.651335	0.436554	0.570067	0.55046	0.588659	0.726205	ELMO/CED-12 family protein;(source:Araport11) protein_coding	AT1G03620	1.78555	1.2881	0.22043	0.338245	0.739027	0.843249	ELMO/CED-12 family protein;(source:Araport11) protein_coding	AT1G03620	0.723214	0.436554	0.713804	0.689917	0.498901	0.613286	ELMO/CED-12 family protein;(source:Araport11) protein_coding
AT1G03630	43.3159	44.1448	-0.229165	-0.725153	0.477527	0.594008	Encodes for a protein with protochlorophyllide oxidoreductase activity. The enzyme is NADPH- and light-dependent. protein_coding PROTOCHLOROPHYLLIDE OXIDOREDUCTASE C (POR C) PROTOCHLOROPHYLLIDE OXIDOREDUCTASE C (POR C); (PORC)	AT1G03630	137.989	202.123	-0.549311	-1.81049	0.0866659	0.197572	Encodes for a protein with protochlorophyllide oxidoreductase activity. The enzyme is NADPH- and light-dependent. protein_coding PROTOCHLOROPHYLLIDE OXIDOREDUCTASE C (POR C) PROTOCHLOROPHYLLIDE OXIDOREDUCTASE C (POR C); (PORC)	AT1G03630	55.3056	44.1448	0.295334	0.937851	0.360532	0.541605	Encodes for a protein with protochlorophyllide oxidoreductase activity. The enzyme is NADPH- and light-dependent. protein_coding PROTOCHLOROPHYLLIDE OXIDOREDUCTASE C (POR C) PROTOCHLOROPHYLLIDE OXIDOREDUCTASE C (POR C); (PORC)	AT1G03630	71.0068	202.123	-1.53553	-5.04474	8.02227e-05	0.000510723	Encodes for a protein with protochlorophyllide oxidoreductase activity. The enzyme is NADPH- and light-dependent. protein_coding PROTOCHLOROPHYLLIDE OXIDOREDUCTASE C (POR C) PROTOCHLOROPHYLLIDE OXIDOREDUCTASE C (POR C); (PORC)
AT1G03650	0.433429	0.407101	0.706758	0.589836	0.562511	0.66784	Acyl-CoA N-acyltransferases (NAT) superfamily protein;(source:Araport11) protein_coding	AT1G03650	0.732201	0.517533	-0.359291	-0.304227	0.764386	0.855513	Acyl-CoA N-acyltransferases (NAT) superfamily protein;(source:Araport11) protein_coding	AT1G03650	0.938904	0.407101	1.54613	1.3621	0.189693	0.36015	Acyl-CoA N-acyltransferases (NAT) superfamily protein;(source:Araport11) protein_coding	AT1G03650	1.40002	0.517533	1.54436	1.63031	0.120122	0.202017	Acyl-CoA N-acyltransferases (NAT) superfamily protein;(source:Araport11) protein_coding
AT1G03680	43.9522	97.8344	-1.15688	-6.30563	5.60964e-06	7.17904e-05	Encodes a m-type thioredoxin (Trx-m1) localized in chloroplast stroma. protein_coding THIOREDOXIN M-TYPE 1 (THM1) ABC TRANSPORTER OF THE MITOCHONDRION 1 (ATM1);THIOREDOXIN M-TYPE 1 (ATHM1);THIOREDOXIN M-TYPE 1 (THM1);ARABIDOPSIS THIOREDOXIN M-TYPE 1 (ATM1);THIOREDOXIN M-TYPE 1 (TRX-M1)	AT1G03680	90.3594	186.368	-1.03464	-5.64869	2.19067e-05	0.000485905	Encodes a m-type thioredoxin (Trx-m1) localized in chloroplast stroma. protein_coding THIOREDOXIN M-TYPE 1 (THM1) ABC TRANSPORTER OF THE MITOCHONDRION 1 (ATM1);THIOREDOXIN M-TYPE 1 (ATHM1);THIOREDOXIN M-TYPE 1 (THM1);ARABIDOPSIS THIOREDOXIN M-TYPE 1 (ATM1);THIOREDOXIN M-TYPE 1 (TRX-M1)	AT1G03680	75.5975	97.8344	-0.412915	-2.26189	0.0360962	0.12127	Encodes a m-type thioredoxin (Trx-m1) localized in chloroplast stroma. protein_coding THIOREDOXIN M-TYPE 1 (THM1) ABC TRANSPORTER OF THE MITOCHONDRION 1 (ATM1);THIOREDOXIN M-TYPE 1 (ATHM1);THIOREDOXIN M-TYPE 1 (THM1);ARABIDOPSIS THIOREDOXIN M-TYPE 1 (ATM1);THIOREDOXIN M-TYPE 1 (TRX-M1)	AT1G03680	80.3789	186.368	-1.21842	-6.64316	2.84759e-06	3.57056e-05	Encodes a m-type thioredoxin (Trx-m1) localized in chloroplast stroma. protein_coding THIOREDOXIN M-TYPE 1 (THM1) ABC TRANSPORTER OF THE MITOCHONDRION 1 (ATM1);THIOREDOXIN M-TYPE 1 (ATHM1);THIOREDOXIN M-TYPE 1 (THM1);ARABIDOPSIS THIOREDOXIN M-TYPE 1 (ATM1);THIOREDOXIN M-TYPE 1 (TRX-M1)
AT1G03687	4.51632	5.68387	-0.293378	-0.994865	0.332772	0.453554	DTW domain-containing protein;(source:Araport11) protein_coding	AT1G03687	8.23482	8.54188	-0.0110158	-0.0424011	0.966638	0.979777	DTW domain-containing protein;(source:Araport11) protein_coding	AT1G03687	3.93874	5.68387	-0.502525	-1.56969	0.133612	0.287139	DTW domain-containing protein;(source:Araport11) protein_coding	AT1G03687	3.71082	8.54188	-1.18179	-3.65741	0.00176086	0.00636299	DTW domain-containing protein;(source:Araport11) protein_coding
AT1G03730	1.21683	1.13627	-1.72071	-1.30131	0.209294	0.316868	pyrroline-5-carboxylate reductase;(source:Araport11) protein_coding	AT1G03730	1.3133	2.5826	-0.922479	-1.07856	0.294792	0.463221	pyrroline-5-carboxylate reductase;(source:Araport11) protein_coding	AT1G03730	1.81719	1.13627	0.784684	0.806233	0.430459	0.606861	pyrroline-5-carboxylate reductase;(source:Araport11) protein_coding	AT1G03730	3.52332	2.5826	0.460379	0.68325	0.503006	0.617161	pyrroline-5-carboxylate reductase;(source:Araport11) protein_coding
AT1G03740	285.97	129.505	1.15734	6.70138	2.53721e-06	3.85651e-05	Protein kinase superfamily protein;(source:Araport11) protein_coding	AT1G03740	249.322	103.306	1.27975	7.54626	5.00577e-07	3.41976e-05	Protein kinase superfamily protein;(source:Araport11) protein_coding	AT1G03740	202.862	129.505	0.639948	3.78848	0.00131216	0.011401	Protein kinase superfamily protein;(source:Araport11) protein_coding	AT1G03740	207.041	103.306	1.0123	6.01384	1.02038e-05	9.81062e-05	Protein kinase superfamily protein;(source:Araport11) protein_coding
AT1G03750	15.0321	18.0657	-0.251921	-1.51493	0.146867	0.239804	switch 2;(source:Araport11) protein_coding SWITCH 2 (SWI2) SWITCH 2 (SWI2);CHROMATIN REMODELING 9 (CHR9);SUCROSE NON-FERMENTING 2 (SNF2)	AT1G03750	12.2181	7.2447	0.768692	3.33055	0.0036554	0.0201061	switch 2;(source:Araport11) protein_coding SWITCH 2 (SWI2) SWITCH 2 (SWI2);CHROMATIN REMODELING 9 (CHR9);SUCROSE NON-FERMENTING 2 (SNF2)	AT1G03750	13.6145	18.0657	-0.389798	-2.23576	0.0380485	0.125413	switch 2;(source:Araport11) protein_coding SWITCH 2 (SWI2) SWITCH 2 (SWI2);CHROMATIN REMODELING 9 (CHR9);SUCROSE NON-FERMENTING 2 (SNF2)	AT1G03750	11.1882	7.2447	0.619735	2.64109	0.0164418	0.0400741	switch 2;(source:Araport11) protein_coding SWITCH 2 (SWI2) SWITCH 2 (SWI2);CHROMATIN REMODELING 9 (CHR9);SUCROSE NON-FERMENTING 2 (SNF2)
AT1G03760	8.06937	12.7741	-0.585027	-2.17233	0.0431981	0.0922231	Prefoldin chaperone subunit family protein;(source:Araport11) protein_coding	AT1G03760	9.32137	4.20761	1.11635	2.85887	0.0103079	0.0431782	Prefoldin chaperone subunit family protein;(source:Araport11) protein_coding	AT1G03760	6.18575	12.7741	-1.03511	-3.43992	0.00286478	0.0202486	Prefoldin chaperone subunit family protein;(source:Araport11) protein_coding	AT1G03760	18.6898	4.20761	2.15749	5.86477	1.39107e-05	0.000124805	Prefoldin chaperone subunit family protein;(source:Araport11) protein_coding
AT1G03770	7.01508	3.77493	1.14694	3.19316	0.00495756	0.0165814	Encodes a nuclear localized protein with similarity to animal polycomb repressive core complex1 (PRC1) core component RING.Appears to function redundantly with ATRING1a, a close paralog. Both interact physically with CLF and LHP1 and appear to function together to repress class I KNOX gene expression. protein_coding RING 1B (RING1B) RING 1B (RING1B)	AT1G03770	4.735	1.79825	1.44238	2.83185	0.0109282	0.0450335	Encodes a nuclear localized protein with similarity to animal polycomb repressive core complex1 (PRC1) core component RING.Appears to function redundantly with ATRING1a, a close paralog. Both interact physically with CLF and LHP1 and appear to function together to repress class I KNOX gene expression. protein_coding RING 1B (RING1B) RING 1B (RING1B)	AT1G03770	3.74614	3.77493	0.245523	0.610294	0.54917	0.705742	Encodes a nuclear localized protein with similarity to animal polycomb repressive core complex1 (PRC1) core component RING.Appears to function redundantly with ATRING1a, a close paralog. Both interact physically with CLF and LHP1 and appear to function together to repress class I KNOX gene expression. protein_coding RING 1B (RING1B) RING 1B (RING1B)	AT1G03770	5.13555	1.79825	1.54904	3.05068	0.00678544	0.0193588	Encodes a nuclear localized protein with similarity to animal polycomb repressive core complex1 (PRC1) core component RING.Appears to function redundantly with ATRING1a, a close paralog. Both interact physically with CLF and LHP1 and appear to function together to repress class I KNOX gene expression. protein_coding RING 1B (RING1B) RING 1B (RING1B)
AT1G03780	1.65427	0.701876	0.923385	1.00448	0.328243	0.44898	Homolog of vertebrate TPX2. Protein has three domains involved in nuclear targeting, one in nuclear export and two in microtubule binding. Involved in mitotic spindle assembly during late prophase and early prometaphase. protein_coding TARGETING PROTEIN FOR XKLP2 (TPX2) (ATTPX2);TARGETING PROTEIN FOR XKLP2 (TPX2)	AT1G03780	0.591968	5.79399	-3.53525	-4.10883	0.00063922	0.00559862	Homolog of vertebrate TPX2. Protein has three domains involved in nuclear targeting, one in nuclear export and two in microtubule binding. Involved in mitotic spindle assembly during late prophase and early prometaphase. protein_coding TARGETING PROTEIN FOR XKLP2 (TPX2) (ATTPX2);TARGETING PROTEIN FOR XKLP2 (TPX2)	AT1G03780	1.88678	0.701876	1.36999	1.53212	0.142593	0.299585	Homolog of vertebrate TPX2. Protein has three domains involved in nuclear targeting, one in nuclear export and two in microtubule binding. Involved in mitotic spindle assembly during late prophase and early prometaphase. protein_coding TARGETING PROTEIN FOR XKLP2 (TPX2) (ATTPX2);TARGETING PROTEIN FOR XKLP2 (TPX2)	AT1G03780	1.46484	5.79399	-1.9702	-3.30296	0.00388659	0.0122225	Homolog of vertebrate TPX2. Protein has three domains involved in nuclear targeting, one in nuclear export and two in microtubule binding. Involved in mitotic spindle assembly during late prophase and early prometaphase. protein_coding TARGETING PROTEIN FOR XKLP2 (TPX2) (ATTPX2);TARGETING PROTEIN FOR XKLP2 (TPX2)
AT1G03820	3.19466	2.55341	-0.198446	-0.196866	0.846102	0.893721	E6-like protein;(source:Araport11) protein_coding	AT1G03820	29.989	7.71062	2.00443	3.96791	0.00087701	0.0071203	E6-like protein;(source:Araport11) protein_coding	AT1G03820	1.45209	2.55341	-1.06734	-0.885069	0.387598	0.567892	E6-like protein;(source:Araport11) protein_coding	AT1G03820	22.2978	7.71062	1.62386	3.15718	0.0053677	0.0159084	E6-like protein;(source:Araport11) protein_coding
AT1G03830	2.90452	6.04306	-1.0706	-3.39564	0.00316219	0.0116346	Assembles liquid?liquid phase separation (LLPS)-driven condensates within the nucleus to protect against infection and autoimmunity. Pseudo-GTPase which sequesters catalytically active GBPL3 under basal conditions but is displaced by GBPL3 LLPS when it enters the nucleus following immune cues to drive the formation of unique membraneless organelles. protein_coding GUANYLATE-BINDING PROTEIN-LIKE 1…	AT1G03830	7.89741	11.3312	-0.510687	-2.07822	0.0520208	0.138078	Assembles liquid?liquid phase separation (LLPS)-driven condensates within the nucleus to protect against infection and autoimmunity. Pseudo-GTPase which sequesters catalytically active GBPL3 under basal conditions but is displaced by GBPL3 LLPS when it enters the nucleus following immune cues to drive the formation of unique membraneless organelles. protein_coding GUANYLATE-BINDING PROTEIN-LIKE 1…	AT1G03830	3.68659	6.04306	-0.700143	-2.23958	0.0377567	0.124883	Assembles liquid?liquid phase separation (LLPS)-driven condensates within the nucleus to protect against infection and autoimmunity. Pseudo-GTPase which sequesters catalytically active GBPL3 under basal conditions but is displaced by GBPL3 LLPS when it enters the nucleus following immune cues to drive the formation of unique membraneless organelles. protein_coding GUANYLATE-BINDING PROTEIN-LIKE 1…	AT1G03830	10.1267	11.3312	-0.164826	-0.705988	0.489084	0.603811	Assembles liquid?liquid phase separation (LLPS)-driven condensates within the nucleus to protect against infection and autoimmunity. Pseudo-GTPase which sequesters catalytically active GBPL3 under basal conditions but is displaced by GBPL3 LLPS when it enters the nucleus following immune cues to drive the formation of unique membraneless organelles. protein_coding GUANYLATE-BINDING PROTEIN-LIKE 1…
AT1G03840	2.13615	1.3438	1.29064	1.34407	0.19535	0.300306	MGP is a nuclear-localized putative transcription factor with three zinc finger domains. MGP can interact with three proteins implicated in root patterning: SCR, SHR, and JKD in Y2H assays, and these interactions depend on the first zinc finger in MGP. MGP appears to be a direct transcriptional target of SHR and SCR, based on promoter binding assays, though it is not expressed in the QC, based on…	AT1G03840	1.90591	1.19924	0.715826	0.749448	0.463111	0.6248	MGP is a nuclear-localized putative transcription factor with three zinc finger domains. MGP can interact with three proteins implicated in root patterning: SCR, SHR, and JKD in Y2H assays, and these interactions depend on the first zinc finger in MGP. MGP appears to be a direct transcriptional target of SHR and SCR, based on promoter binding assays, though it is not expressed in the QC, based on…	AT1G03840	5.66246	1.3438	2.6012	2.85645	0.0103621	0.0504832	MGP is a nuclear-localized putative transcription factor with three zinc finger domains. MGP can interact with three proteins implicated in root patterning: SCR, SHR, and JKD in Y2H assays, and these interactions depend on the first zinc finger in MGP. MGP appears to be a direct transcriptional target of SHR and SCR, based on promoter binding assays, though it is not expressed in the QC, based on…	AT1G03840	4.99566	1.19924	1.98639	2.3338	0.0311904	0.067884	MGP is a nuclear-localized putative transcription factor with three zinc finger domains. MGP can interact with three proteins implicated in root patterning: SCR, SHR, and JKD in Y2H assays, and these interactions depend on the first zinc finger in MGP. MGP appears to be a direct transcriptional target of SHR and SCR, based on promoter binding assays, though it is not expressed in the QC, based on…
AT1G03850	1.06106	0.515422	1.52271	1.33139	0.199405	0.305141	Encodes glutaredoxin ATGRXS13, required to facilitate Botrytis cinerea infection of Arabidopsis thaliana plants. Sylvain La Camera et al (2011, PMID:21756272) reported a third splice variant in addition to the two annotated in TAIR10. It is a member of the CC-type glutaredoxin (ROXY) family that has been shown to interact with the transcription factor TGA2 and suppress ORA59 promoter activity. pr…	AT1G03850	2.25832	0.181204	3.35726	2.54628	0.0200843	0.0698201	Encodes glutaredoxin ATGRXS13, required to facilitate Botrytis cinerea infection of Arabidopsis thaliana plants. Sylvain La Camera et al (2011, PMID:21756272) reported a third splice variant in addition to the two annotated in TAIR10. It is a member of the CC-type glutaredoxin (ROXY) family that has been shown to interact with the transcription factor TGA2 and suppress ORA59 promoter activity. pr…	AT1G03850	0.841705	0.515422	1.16246	0.970483	0.344456	0.526661	Encodes glutaredoxin ATGRXS13, required to facilitate Botrytis cinerea infection of Arabidopsis thaliana plants. Sylvain La Camera et al (2011, PMID:21756272) reported a third splice variant in addition to the two annotated in TAIR10. It is a member of the CC-type glutaredoxin (ROXY) family that has been shown to interact with the transcription factor TGA2 and suppress ORA59 promoter activity. pr…	AT1G03850	37.0208	0.181204	7.49766	5.98968	1.07274e-05	0.000102198	Encodes glutaredoxin ATGRXS13, required to facilitate Botrytis cinerea infection of Arabidopsis thaliana plants. Sylvain La Camera et al (2011, PMID:21756272) reported a third splice variant in addition to the two annotated in TAIR10. It is a member of the CC-type glutaredoxin (ROXY) family that has been shown to interact with the transcription factor TGA2 and suppress ORA59 promoter activity. pr…
AT1G03860	50.2921	18.2687	1.47272	5.9434	1.18089e-05	0.00013082	prohibitin 2 protein_coding PROHIBITIN 2 (PHB2) PROHIBITIN 2 (ATPHB2);PROHIBITIN 2 (PHB2)	AT1G03860	36.2324	19.8543	0.86238	3.35603	0.00345391	0.0193351	prohibitin 2 protein_coding PROHIBITIN 2 (PHB2) PROHIBITIN 2 (ATPHB2);PROHIBITIN 2 (PHB2)	AT1G03860	36.4244	18.2687	1.02252	4.04103	0.00074425	0.00756204	prohibitin 2 protein_coding PROHIBITIN 2 (PHB2) PROHIBITIN 2 (ATPHB2);PROHIBITIN 2 (PHB2)	AT1G03860	47.1399	19.8543	1.2476	4.92766	0.00010363	0.000624208	prohibitin 2 protein_coding PROHIBITIN 2 (PHB2) PROHIBITIN 2 (ATPHB2);PROHIBITIN 2 (PHB2)
AT1G03870	18.4504	10.8796	0.910567	2.2186	0.0393831	0.0856851	fasciclin-like arabinogalactan-protein 9 (Fla9). Possibly involved in embryogenesis and seed development. protein_coding FASCICLIN-LIKE ARABINOOGALACTAN 9 (FLA9) FASCICLIN-LIKE ARABINOOGALACTAN 9 (FLA9)	AT1G03870	9.61246	14.6289	-0.689001	-1.56449	0.134825	0.269474	fasciclin-like arabinogalactan-protein 9 (Fla9). Possibly involved in embryogenesis and seed development. protein_coding FASCICLIN-LIKE ARABINOOGALACTAN 9 (FLA9) FASCICLIN-LIKE ARABINOOGALACTAN 9 (FLA9)	AT1G03870	30.2903	10.8796	1.50961	3.72401	0.00151647	0.0126961	fasciclin-like arabinogalactan-protein 9 (Fla9). Possibly involved in embryogenesis and seed development. protein_coding FASCICLIN-LIKE ARABINOOGALACTAN 9 (FLA9) FASCICLIN-LIKE ARABINOOGALACTAN 9 (FLA9)	AT1G03870	1.66584	14.6289	-3.28589	-3.82909	0.00119783	0.00461141	fasciclin-like arabinogalactan-protein 9 (Fla9). Possibly involved in embryogenesis and seed development. protein_coding FASCICLIN-LIKE ARABINOOGALACTAN 9 (FLA9) FASCICLIN-LIKE ARABINOOGALACTAN 9 (FLA9)
AT1G03900	75.8822	97.7612	-0.4042	-2.47671	0.0232286	0.0565651	member of NAP family, an heterogeneous subfamily of the ATP-binding Cassette (ABC) superfamily of membrane transporters. The NAPs proteins are characterized by having only one nucleotide-binding folds (NBFs) domain. protein_coding ATP-BINDING CASSETTE I18 (ABCI18) NON-INTRINSIC ABC PROTEIN 4 (ATNAP4);ATP-BINDING CASSETTE I18 (ABCI18);NON-INTRINSIC ABC PROTEIN 4 (NAP4)	AT1G03900	51.1758	75.8487	-0.562019	-3.33833	0.00359266	0.0198574	member of NAP family, an heterogeneous subfamily of the ATP-binding Cassette (ABC) superfamily of membrane transporters. The NAPs proteins are characterized by having only one nucleotide-binding folds (NBFs) domain. protein_coding ATP-BINDING CASSETTE I18 (ABCI18) NON-INTRINSIC ABC PROTEIN 4 (ATNAP4);ATP-BINDING CASSETTE I18 (ABCI18);NON-INTRINSIC ABC PROTEIN 4 (NAP4)	AT1G03900	73.4667	97.7612	-0.412077	-2.51936	0.02125	0.0840296	member of NAP family, an heterogeneous subfamily of the ATP-binding Cassette (ABC) superfamily of membrane transporters. The NAPs proteins are characterized by having only one nucleotide-binding folds (NBFs) domain. protein_coding ATP-BINDING CASSETTE I18 (ABCI18) NON-INTRINSIC ABC PROTEIN 4 (ATNAP4);ATP-BINDING CASSETTE I18 (ABCI18);NON-INTRINSIC ABC PROTEIN 4 (NAP4)	AT1G03900	144.561	75.8487	0.932678	5.63519	2.25414e-05	0.000183804	member of NAP family, an heterogeneous subfamily of the ATP-binding Cassette (ABC) superfamily of membrane transporters. The NAPs proteins are characterized by having only one nucleotide-binding folds (NBFs) domain. protein_coding ATP-BINDING CASSETTE I18 (ABCI18) NON-INTRINSIC ABC PROTEIN 4 (ATNAP4);ATP-BINDING CASSETTE I18 (ABCI18);NON-INTRINSIC ABC PROTEIN 4 (NAP4)
AT1G03905	0.581487	0.51137	0.554281	0.402986	0.691626	0.776664	P-loop containing nucleoside triphosphate hydrolases superfamily protein;(source:Araport11) protein_coding ATP-BINDING CASSETTE I19 (ABCI19) ATP-BINDING CASSETTE I19 (ABCI19);NON-INTRINSIC ABC PROTEIN 4 (ATNAP4)	AT1G03905	0.701101	0.722248	-0.972429	-0.771313	0.450364	0.613925	P-loop containing nucleoside triphosphate hydrolases superfamily protein;(source:Araport11) protein_coding ATP-BINDING CASSETTE I19 (ABCI19) ATP-BINDING CASSETTE I19 (ABCI19);NON-INTRINSIC ABC PROTEIN 4 (ATNAP4)	AT1G03905	0.490182	0.51137	0.517419	0.36851	0.716721	0.828311	P-loop containing nucleoside triphosphate hydrolases superfamily protein;(source:Araport11) protein_coding ATP-BINDING CASSETTE I19 (ABCI19) ATP-BINDING CASSETTE I19 (ABCI19);NON-INTRINSIC ABC PROTEIN 4 (ATNAP4)	AT1G03905	1.17241	0.722248	0.303969	0.278613	0.783665	0.850248	P-loop containing nucleoside triphosphate hydrolases superfamily protein;(source:Araport11) protein_coding ATP-BINDING CASSETTE I19 (ABCI19) ATP-BINDING CASSETTE I19 (ABCI19);NON-INTRINSIC ABC PROTEIN 4 (ATNAP4)
AT1G03910	48.4079	110.736	-1.20172	-7.88359	2.68967e-07	6.79825e-06	Encodes the Arabidopsis homolog of a conserved eukaryotic protein without known functional domains. The protein that localizes to nuclear speckles and colocalizes with known splicing proteins. protein_coding CACTIN (CTN) CACTIN (CTN)	AT1G03910	105.322	81.842	0.362341	2.36406	0.0293178	0.0917292	Encodes the Arabidopsis homolog of a conserved eukaryotic protein without known functional domains. The protein that localizes to nuclear speckles and colocalizes with known splicing proteins. protein_coding CACTIN (CTN) CACTIN (CTN)	AT1G03910	35.7986	110.736	-1.63348	-10.404	4.0722e-09	7.65044e-07	Encodes the Arabidopsis homolog of a conserved eukaryotic protein without known functional domains. The protein that localizes to nuclear speckles and colocalizes with known splicing proteins. protein_coding CACTIN (CTN) CACTIN (CTN)	AT1G03910	86.8324	81.842	0.0851874	0.555577	0.585227	0.690403	Encodes the Arabidopsis homolog of a conserved eukaryotic protein without known functional domains. The protein that localizes to nuclear speckles and colocalizes with known splicing proteins. protein_coding CACTIN (CTN) CACTIN (CTN)
AT1G03920	0.48878	1.15736	-0.902423	-0.802954	0.432304	0.551371	Ubiquitously expressed protein kinase. protein_coding NUCLEAR DBF2-RELATED 2 (NDR2) NUCLEAR DBF2-RELATED 2 (NDR2)	AT1G03920	0.349173	1.16663	-2.07162	-1.50306	0.149881	0.29098	Ubiquitously expressed protein kinase. protein_coding NUCLEAR DBF2-RELATED 2 (NDR2) NUCLEAR DBF2-RELATED 2 (NDR2)	AT1G03920	0.932594	1.15736	-1.42077	-1.08226	0.29319	0.475087	Ubiquitously expressed protein kinase. protein_coding NUCLEAR DBF2-RELATED 2 (NDR2) NUCLEAR DBF2-RELATED 2 (NDR2)	AT1G03920	0.520129	1.16663	-1.3229	-1.08327	0.292751	0.408794	Ubiquitously expressed protein kinase. protein_coding NUCLEAR DBF2-RELATED 2 (NDR2) NUCLEAR DBF2-RELATED 2 (NDR2)
AT1G03930	56.8124	54.4787	0.0631966	0.387716	0.702698	0.785715	Phosphorylates serine, threonine, and tyrosine protein_coding DUAL SPECIFICITY KINASE 1 (ADK1) CASEIN KINASE I-LIKE 9 ALPHA (CKL9ALPHA);DUAL SPECIFICITY KINASE 1 (ADK1);CASEIN KINASE I-LIKE 9 BETA (CKL9BETA)	AT1G03930	57.143	57.0164	0.00474645	0.0285936	0.977498	0.986	Phosphorylates serine, threonine, and tyrosine protein_coding DUAL SPECIFICITY KINASE 1 (ADK1) CASEIN KINASE I-LIKE 9 ALPHA (CKL9ALPHA);DUAL SPECIFICITY KINASE 1 (ADK1);CASEIN KINASE I-LIKE 9 BETA (CKL9BETA)	AT1G03930	48.1176	54.4787	-0.165112	-0.999628	0.330522	0.512591	Phosphorylates serine, threonine, and tyrosine protein_coding DUAL SPECIFICITY KINASE 1 (ADK1) CASEIN KINASE I-LIKE 9 ALPHA (CKL9ALPHA);DUAL SPECIFICITY KINASE 1 (ADK1);CASEIN KINASE I-LIKE 9 BETA (CKL9BETA)	AT1G03930	23.3512	57.0164	-1.2765	-7.05245	1.27749e-06	1.99618e-05	Phosphorylates serine, threonine, and tyrosine protein_coding DUAL SPECIFICITY KINASE 1 (ADK1) CASEIN KINASE I-LIKE 9 ALPHA (CKL9ALPHA);DUAL SPECIFICITY KINASE 1 (ADK1);CASEIN KINASE I-LIKE 9 BETA (CKL9BETA)
AT1G03950	34.9052	20.2682	0.774683	5.20609	5.64953e-05	0.000457293	vacuolar protein sorting-associated protein 2.3;(source:Araport11) protein_coding VACUOLAR PROTEIN SORTING-ASSOCIATED PROTEIN 2.3 (VPS2.3) VACUOLAR PROTEIN SORTING-ASSOCIATED PROTEIN 2.3 (VPS2.3)	AT1G03950	22.2673	12.3238	0.840648	4.64746	0.000192185	0.00232042	vacuolar protein sorting-associated protein 2.3;(source:Araport11) protein_coding VACUOLAR PROTEIN SORTING-ASSOCIATED PROTEIN 2.3 (VPS2.3) VACUOLAR PROTEIN SORTING-ASSOCIATED PROTEIN 2.3 (VPS2.3)	AT1G03950	19.9876	20.2682	-0.0151953	-0.0959895	0.924572	0.959193	vacuolar protein sorting-associated protein 2.3;(source:Araport11) protein_coding VACUOLAR PROTEIN SORTING-ASSOCIATED PROTEIN 2.3 (VPS2.3) VACUOLAR PROTEIN SORTING-ASSOCIATED PROTEIN 2.3 (VPS2.3)	AT1G03950	20.3416	12.3238	0.723948	3.9528	0.000907283	0.00364758	vacuolar protein sorting-associated protein 2.3;(source:Araport11) protein_coding VACUOLAR PROTEIN SORTING-ASSOCIATED PROTEIN 2.3 (VPS2.3) VACUOLAR PROTEIN SORTING-ASSOCIATED PROTEIN 2.3 (VPS2.3)
AT1G03960	12.8722	14.1114	-0.125801	-0.666337	0.513507	0.625836	Calcium-binding EF hand family protein;(source:Araport11) protein_coding	AT1G03960	14.8687	16.6648	-0.187845	-0.967425	0.345941	0.515398	Calcium-binding EF hand family protein;(source:Araport11) protein_coding	AT1G03960	19.4498	14.1114	0.437407	2.35817	0.029674	0.105445	Calcium-binding EF hand family protein;(source:Araport11) protein_coding	AT1G03960	13.5934	16.6648	-0.285878	-1.44417	0.165589	0.260655	Calcium-binding EF hand family protein;(source:Araport11) protein_coding
AT1G03970	54.8206	66.4284	-0.277594	-1.84776	0.0808622	0.151115	encodes a basic leucine zipper G-box binding factor that can bind to G-box motifs only as heterodimers with GBF2 or GBF3. A single amino acid change can confer G-box binding as homodimers. protein_coding G-BOX BINDING FACTOR 4 (GBF4) G-BOX BINDING FACTOR 4 (GBF4)	AT1G03970	54.3777	35.6931	0.598633	3.69468	0.00161965	0.0111134	encodes a basic leucine zipper G-box binding factor that can bind to G-box motifs only as heterodimers with GBF2 or GBF3. A single amino acid change can confer G-box binding as homodimers. protein_coding G-BOX BINDING FACTOR 4 (GBF4) G-BOX BINDING FACTOR 4 (GBF4)	AT1G03970	34.6383	66.4284	-0.934673	-6.01268	1.02283e-05	0.000291201	encodes a basic leucine zipper G-box binding factor that can bind to G-box motifs only as heterodimers with GBF2 or GBF3. A single amino acid change can confer G-box binding as homodimers. protein_coding G-BOX BINDING FACTOR 4 (GBF4) G-BOX BINDING FACTOR 4 (GBF4)	AT1G03970	38.8881	35.6931	0.122462	0.739709	0.468858	0.584617	encodes a basic leucine zipper G-box binding factor that can bind to G-box motifs only as heterodimers with GBF2 or GBF3. A single amino acid change can confer G-box binding as homodimers. protein_coding G-BOX BINDING FACTOR 4 (GBF4) G-BOX BINDING FACTOR 4 (GBF4)
AT1G04000	16.0985	12.0483	0.379739	1.77719	0.092158	0.167281	hypothetical protein;(source:Araport11) protein_coding	AT1G04000	26.5619	11.9517	1.16241	5.32551	4.36579e-05	0.00078172	hypothetical protein;(source:Araport11) protein_coding	AT1G04000	25.5763	12.0483	1.06637	5.08878	7.28815e-05	0.00133975	hypothetical protein;(source:Araport11) protein_coding	AT1G04000	9.86335	11.9517	-0.272982	-1.08803	0.290699	0.406654	hypothetical protein;(source:Araport11) protein_coding
AT1G04010	14.8697	10.3902	0.592937	2.71874	0.0139356	0.0376973	phospholipid sterol acyl transferase 1;(source:Araport11) protein_coding PHOSPHOLIPID STEROL ACYL TRANSFERASE 1 (PSAT1) PHOSPHOLIPID STEROL ACYL TRANSFERASE 1 (PSAT1);ENHANCED RESPONSE TO PHYTOPHTHORA 1 (ERP1); (ATPSAT1)	AT1G04010	11.3018	11.8051	-0.0318673	-0.135865	0.893411	0.936392	phospholipid sterol acyl transferase 1;(source:Araport11) protein_coding PHOSPHOLIPID STEROL ACYL TRANSFERASE 1 (PSAT1) PHOSPHOLIPID STEROL ACYL TRANSFERASE 1 (PSAT1);ENHANCED RESPONSE TO PHYTOPHTHORA 1 (ERP1); (ATPSAT1)	AT1G04010	14.411	10.3902	0.557153	2.48436	0.0228613	0.088343	phospholipid sterol acyl transferase 1;(source:Araport11) protein_coding PHOSPHOLIPID STEROL ACYL TRANSFERASE 1 (PSAT1) PHOSPHOLIPID STEROL ACYL TRANSFERASE 1 (PSAT1);ENHANCED RESPONSE TO PHYTOPHTHORA 1 (ERP1); (ATPSAT1)	AT1G04010	13.5171	11.8051	0.21733	0.948144	0.355407	0.473445	phospholipid sterol acyl transferase 1;(source:Araport11) protein_coding PHOSPHOLIPID STEROL ACYL TRANSFERASE 1 (PSAT1) PHOSPHOLIPID STEROL ACYL TRANSFERASE 1 (PSAT1);ENHANCED RESPONSE TO PHYTOPHTHORA 1 (ERP1); (ATPSAT1)
AT1G04020	0.700466	0.0511441	3.2845	2.07578	0.0522693	0.10778	Encodes a protein containing two tandem BRCA1 C-Terminal (BRCT) domains, which function in phosphorylation-dependent protein-protein interactions. Loss of function mutations cause defects in meristem organization due to failure to repress WUS. BARD1 binds to WUS promoter and over expression of BARD reduces the extent of WUS expression. protein_coding BREAST CANCER ASSOCIATED RING 1 (BARD1) (ATBAR…	AT1G04020	1.26099	7.10026	-3.56271	-5.11365	6.90418e-05	0.00110579	Encodes a protein containing two tandem BRCA1 C-Terminal (BRCT) domains, which function in phosphorylation-dependent protein-protein interactions. Loss of function mutations cause defects in meristem organization due to failure to repress WUS. BARD1 binds to WUS promoter and over expression of BARD reduces the extent of WUS expression. protein_coding BREAST CANCER ASSOCIATED RING 1 (BARD1) (ATBAR…	AT1G04020	1.0166	0.0511441	3.92853	2.52024	0.0212112	0.0839113	Encodes a protein containing two tandem BRCA1 C-Terminal (BRCT) domains, which function in phosphorylation-dependent protein-protein interactions. Loss of function mutations cause defects in meristem organization due to failure to repress WUS. BARD1 binds to WUS promoter and over expression of BARD reduces the extent of WUS expression. protein_coding BREAST CANCER ASSOCIATED RING 1 (BARD1) (ATBAR…	AT1G04020	10.1512	7.10026	0.480242	1.57768	0.131765	0.217069	Encodes a protein containing two tandem BRCA1 C-Terminal (BRCT) domains, which function in phosphorylation-dependent protein-protein interactions. Loss of function mutations cause defects in meristem organization due to failure to repress WUS. BARD1 binds to WUS promoter and over expression of BARD reduces the extent of WUS expression. protein_coding BREAST CANCER ASSOCIATED RING 1 (BARD1) (ATBAR…
AT1G04030	2.64231	3.26283	-0.146793	-0.305875	0.763151	0.833226	eisosome protein;(source:Araport11) protein_coding	AT1G04030	0.975636	4.41768	-2.47564	-3.26324	0.00424484	0.0224262	eisosome protein;(source:Araport11) protein_coding	AT1G04030	3.61957	3.26283	0.206467	0.431433	0.671192	0.796402	eisosome protein;(source:Araport11) protein_coding	AT1G04030	2.93656	4.41768	-0.619195	-1.29671	0.210839	0.315998	eisosome protein;(source:Araport11) protein_coding
AT1G04040	40.2705	4.24997	3.40519	7.40582	6.51237e-07	1.33131e-05	HAD superfamily, subfamily IIIB acid phosphatase;(source:Araport11) protein_coding	AT1G04040	13.7781	41.2142	-1.68011	-5.70269	1.95456e-05	0.00044672	HAD superfamily, subfamily IIIB acid phosphatase;(source:Araport11) protein_coding	AT1G04040	12.8103	4.24997	1.75305	3.62571	0.00189052	0.0149294	HAD superfamily, subfamily IIIB acid phosphatase;(source:Araport11) protein_coding	AT1G04040	2.83632	41.2142	-3.98593	-7.52366	5.22137e-07	1.03913e-05	HAD superfamily, subfamily IIIB acid phosphatase;(source:Araport11) protein_coding
AT1G04050	1.62125	1.25271	0.31011	0.38045	0.70799	0.789706	Encodes SUVR1, one of the four closely related Arabidopsis SUVR proteins that belong to the SU(VAR)3-9 subgroup of SET-domain proteins. Proteins containing the evolutionarily conserved SET domain are involved in regulation of eukaryotic gene expression and chromatin structure through their histone lysine methyltransferase (HMTase) activity. SUVR1, SUVR2 and SUVR4 proteins contain a novel domain a…	AT1G04050	2.55212	3.1946	-0.300563	-0.510809	0.61559	0.747872	Encodes SUVR1, one of the four closely related Arabidopsis SUVR proteins that belong to the SU(VAR)3-9 subgroup of SET-domain proteins. Proteins containing the evolutionarily conserved SET domain are involved in regulation of eukaryotic gene expression and chromatin structure through their histone lysine methyltransferase (HMTase) activity. SUVR1, SUVR2 and SUVR4 proteins contain a novel domain a…	AT1G04050	1.57178	1.25271	0.583925	0.704734	0.489846	0.658852	Encodes SUVR1, one of the four closely related Arabidopsis SUVR proteins that belong to the SU(VAR)3-9 subgroup of SET-domain proteins. Proteins containing the evolutionarily conserved SET domain are involved in regulation of eukaryotic gene expression and chromatin structure through their histone lysine methyltransferase (HMTase) activity. SUVR1, SUVR2 and SUVR4 proteins contain a novel domain a…	AT1G04050	1.6371	3.1946	-0.949527	-1.40645	0.17634	0.274066	Encodes SUVR1, one of the four closely related Arabidopsis SUVR proteins that belong to the SU(VAR)3-9 subgroup of SET-domain proteins. Proteins containing the evolutionarily conserved SET domain are involved in regulation of eukaryotic gene expression and chromatin structure through their histone lysine methyltransferase (HMTase) activity. SUVR1, SUVR2 and SUVR4 proteins contain a novel domain a…
AT1G04053	0.4691	0.705736	0.285394	0.253359	0.802814	0.862398	Natural antisense transcript overlaps with AT1G01750;(source:Araport11) antisense_long_noncoding_rna	AT1G04053	1.08397	0.734018	0.325846	0.358921	0.723761	0.827826	Natural antisense transcript overlaps with AT1G01750;(source:Araport11) antisense_long_noncoding_rna	AT1G04053	0.936832	0.705736	1.29296	1.20646	0.243001	0.422553	Natural antisense transcript overlaps with AT1G01750;(source:Araport11) antisense_long_noncoding_rna	AT1G04053	0.365433	0.734018	-1.02245	-0.930061	0.364443	0.482713	Natural antisense transcript overlaps with AT1G01750;(source:Araport11) antisense_long_noncoding_rna
AT1G04070	1.13244	1.07606	0.68508	0.96	0.349565	0.47057	Subunit of the TOM complex, a translocase in the outer mitochondrial membrane that selectively allows proteins with a mitochondrial targeting sequence to enter the mitochondrion. protein_coding TRANSLOCASE OF OUTER MEMBRANE 22-I (TOM22-I) (ATTOM22-I);TRANSLOCASE OF OUTER MEMBRANE 22-I (TOM22-I)	AT1G04070	1.34598	0.93337	0.545533	0.778054	0.446478	0.610479	Subunit of the TOM complex, a translocase in the outer mitochondrial membrane that selectively allows proteins with a mitochondrial targeting sequence to enter the mitochondrion. protein_coding TRANSLOCASE OF OUTER MEMBRANE 22-I (TOM22-I) (ATTOM22-I);TRANSLOCASE OF OUTER MEMBRANE 22-I (TOM22-I)	AT1G04070	1.00642	1.07606	0.556588	0.741919	0.46755	0.64041	Subunit of the TOM complex, a translocase in the outer mitochondrial membrane that selectively allows proteins with a mitochondrial targeting sequence to enter the mitochondrion. protein_coding TRANSLOCASE OF OUTER MEMBRANE 22-I (TOM22-I) (ATTOM22-I);TRANSLOCASE OF OUTER MEMBRANE 22-I (TOM22-I)	AT1G04070	2.2523	0.93337	1.24444	1.90254	0.0729522	0.13547	Subunit of the TOM complex, a translocase in the outer mitochondrial membrane that selectively allows proteins with a mitochondrial targeting sequence to enter the mitochondrion. protein_coding TRANSLOCASE OF OUTER MEMBRANE 22-I (TOM22-I) (ATTOM22-I);TRANSLOCASE OF OUTER MEMBRANE 22-I (TOM22-I)
AT1G04080	86.5419	99.9348	-0.2103	-1.77008	0.0933687	0.168909	Encodes a U1 small nuclear ribonucleoprotein (snRNP) factor involved in alternative splicing. protein_coding (PRP39A) (PRP39A); (PRP39)	AT1G04080	108.76	89.606	0.279189	2.3393	0.0308424	0.0950395	Encodes a U1 small nuclear ribonucleoprotein (snRNP) factor involved in alternative splicing. protein_coding (PRP39A) (PRP39A); (PRP39)	AT1G04080	72.0364	99.9348	-0.471341	-3.96402	0.000884703	0.00858962	Encodes a U1 small nuclear ribonucleoprotein (snRNP) factor involved in alternative splicing. protein_coding (PRP39A) (PRP39A); (PRP39)	AT1G04080	90.2963	89.606	0.0109221	0.0915328	0.928063	0.950528	Encodes a U1 small nuclear ribonucleoprotein (snRNP) factor involved in alternative splicing. protein_coding (PRP39A) (PRP39A); (PRP39)
AT1G04090	1.01754	0.0896641	4.05292	2.84406	0.0106436	0.0304032	vacuolar sorting-associated protein (DUF946);(source:Araport11) protein_coding	AT1G04090	0.276963	0.650331	-0.860295	-0.787816	0.440887	0.605302	vacuolar sorting-associated protein (DUF946);(source:Araport11) protein_coding	AT1G04090	0.973779	0.0896641	4.0908	2.83591	0.0108327	0.0520096	vacuolar sorting-associated protein (DUF946);(source:Araport11) protein_coding	AT1G04090	0.701716	0.650331	0.154637	0.159354	0.875135	0.915483	vacuolar sorting-associated protein (DUF946);(source:Araport11) protein_coding
AT1G04100	5.99336	4.82177	0.209112	0.57711	0.570896	0.674811	Auxin induced gene, IAA10 (IAA10). protein_coding INDOLEACETIC ACID-INDUCED PROTEIN 10 (IAA10) INDOLEACETIC ACID-INDUCED PROTEIN 10 (IAA10)	AT1G04100	3.06161	1.98772	0.60808	1.02318	0.319554	0.48924	Auxin induced gene, IAA10 (IAA10). protein_coding INDOLEACETIC ACID-INDUCED PROTEIN 10 (IAA10) INDOLEACETIC ACID-INDUCED PROTEIN 10 (IAA10)	AT1G04100	6.95549	4.82177	0.564987	1.55351	0.13742	0.292567	Auxin induced gene, IAA10 (IAA10). protein_coding INDOLEACETIC ACID-INDUCED PROTEIN 10 (IAA10) INDOLEACETIC ACID-INDUCED PROTEIN 10 (IAA10)	AT1G04100	3.34074	1.98772	0.720328	1.22058	0.237736	0.347576	Auxin induced gene, IAA10 (IAA10). protein_coding INDOLEACETIC ACID-INDUCED PROTEIN 10 (IAA10) INDOLEACETIC ACID-INDUCED PROTEIN 10 (IAA10)
AT1G04110	0.214431	0.247194	0.935068	0.422869	0.677317	0.764571	Initially identified as a mutation affecting stomatal development and distribution. Encodes a protein similar to serine proteases. protein_coding STOMATAL DENSITY AND DISTRIBUTION 1 (SDD1) (ATSDD1);STOMATAL DENSITY AND DISTRIBUTION 1 (SDD1)	AT1G04110	0	1.09392	-5.57609	-2.84486	0.0106253	0.0441532	Initially identified as a mutation affecting stomatal development and distribution. Encodes a protein similar to serine proteases. protein_coding STOMATAL DENSITY AND DISTRIBUTION 1 (SDD1) (ATSDD1);STOMATAL DENSITY AND DISTRIBUTION 1 (SDD1)	AT1G04110	0.325014	0.247194	1.11121	0.500922	0.622396	0.761473	Initially identified as a mutation affecting stomatal development and distribution. Encodes a protein similar to serine proteases. protein_coding STOMATAL DENSITY AND DISTRIBUTION 1 (SDD1) (ATSDD1);STOMATAL DENSITY AND DISTRIBUTION 1 (SDD1)	AT1G04110	0.221022	1.09392	-3.7216	-1.89871	0.0734815	0.136229	Initially identified as a mutation affecting stomatal development and distribution. Encodes a protein similar to serine proteases. protein_coding STOMATAL DENSITY AND DISTRIBUTION 1 (SDD1) (ATSDD1);STOMATAL DENSITY AND DISTRIBUTION 1 (SDD1)
AT1G04120	72.8687	79.0872	-0.123905	-0.704834	0.489786	0.604939	encodes a high-affinity inositol hexakisphosphate transporter that plays a role in guard cell signaling and phytate storage. It is a member of MRP subfamily / ABC transporter subfamily C. protein_coding ATP-BINDING CASSETTE C5 (ABCC5) MULTIDRUG RESISTANCE-ASSOCIATED PROTEIN 5 (ATMRP5);MULTIDRUG RESISTANCE-ASSOCIATED PROTEIN 5 (MRP5);ARABIDOPSIS THALIANA ATP-BINDING CASSETTE C5 (ATABCC5);ATP-BINDI…	AT1G04120	59.7037	58.1424	0.0233972	0.128706	0.898994	0.939965	encodes a high-affinity inositol hexakisphosphate transporter that plays a role in guard cell signaling and phytate storage. It is a member of MRP subfamily / ABC transporter subfamily C. protein_coding ATP-BINDING CASSETTE C5 (ABCC5) MULTIDRUG RESISTANCE-ASSOCIATED PROTEIN 5 (ATMRP5);MULTIDRUG RESISTANCE-ASSOCIATED PROTEIN 5 (MRP5);ARABIDOPSIS THALIANA ATP-BINDING CASSETTE C5 (ATABCC5);ATP-BINDI…	AT1G04120	87.0995	79.0872	0.139562	0.793039	0.437914	0.613093	encodes a high-affinity inositol hexakisphosphate transporter that plays a role in guard cell signaling and phytate storage. It is a member of MRP subfamily / ABC transporter subfamily C. protein_coding ATP-BINDING CASSETTE C5 (ABCC5) MULTIDRUG RESISTANCE-ASSOCIATED PROTEIN 5 (ATMRP5);MULTIDRUG RESISTANCE-ASSOCIATED PROTEIN 5 (MRP5);ARABIDOPSIS THALIANA ATP-BINDING CASSETTE C5 (ATABCC5);ATP-BINDI…	AT1G04120	116.663	58.1424	1.0071	5.60986	2.37834e-05	0.000191768	encodes a high-affinity inositol hexakisphosphate transporter that plays a role in guard cell signaling and phytate storage. It is a member of MRP subfamily / ABC transporter subfamily C. protein_coding ATP-BINDING CASSETTE C5 (ABCC5) MULTIDRUG RESISTANCE-ASSOCIATED PROTEIN 5 (ATMRP5);MULTIDRUG RESISTANCE-ASSOCIATED PROTEIN 5 (MRP5);ARABIDOPSIS THALIANA ATP-BINDING CASSETTE C5 (ATABCC5);ATP-BINDI…
AT1G04130	12.3154	7.05142	0.790447	3.15705	0.00536922	0.017672	Encodes one of the 36 carboxylate clamp (CC)-tetratricopeptide repeat (TPR) proteins (Prasad 2010, Pubmed ID: 20856808). Interacts with Hsp90/Hsp70 as co-chaperone. protein_coding TETRATRICOPEPTIDE REPEAT 2 (TPR2) (AtTPR2);TETRATRICOPEPTIDE REPEAT 2 (TPR2)	AT1G04130	10.5391	8.0649	0.355834	1.33394	0.198585	0.35313	Encodes one of the 36 carboxylate clamp (CC)-tetratricopeptide repeat (TPR) proteins (Prasad 2010, Pubmed ID: 20856808). Interacts with Hsp90/Hsp70 as co-chaperone. protein_coding TETRATRICOPEPTIDE REPEAT 2 (TPR2) (AtTPR2);TETRATRICOPEPTIDE REPEAT 2 (TPR2)	AT1G04130	10.36	7.05142	0.545188	2.08238	0.0515979	0.152777	Encodes one of the 36 carboxylate clamp (CC)-tetratricopeptide repeat (TPR) proteins (Prasad 2010, Pubmed ID: 20856808). Interacts with Hsp90/Hsp70 as co-chaperone. protein_coding TETRATRICOPEPTIDE REPEAT 2 (TPR2) (AtTPR2);TETRATRICOPEPTIDE REPEAT 2 (TPR2)	AT1G04130	12.1938	8.0649	0.587573	2.25021	0.0369567	0.0780294	Encodes one of the 36 carboxylate clamp (CC)-tetratricopeptide repeat (TPR) proteins (Prasad 2010, Pubmed ID: 20856808). Interacts with Hsp90/Hsp70 as co-chaperone. protein_coding TETRATRICOPEPTIDE REPEAT 2 (TPR2) (AtTPR2);TETRATRICOPEPTIDE REPEAT 2 (TPR2)
AT1G04133	1.82816	7.5608	-3.78109	-4.24934	0.000466574	0.00252463	None;(source:Araport11) long_noncoding_rna	AT1G04133	0.0232685	0.0553271	-1.46096	-0.507585	0.617806	0.749497	None;(source:Araport11) long_noncoding_rna	AT1G04133	3.06844	7.5608	-1.36854	-2.53226	0.0206838	0.0823546	None;(source:Araport11) long_noncoding_rna	AT1G04133	0	0.0553271	-2.351	-0.816815	0.424538	0.542202	None;(source:Araport11) long_noncoding_rna
AT1G04140	111.333	163.518	-0.553136	-4.69072	0.000174634	0.00113382	Transducin family protein / WD-40 repeat family protein;(source:Araport11) protein_coding	AT1G04140	108.489	116.04	-0.0920565	-0.787938	0.440818	0.60525	Transducin family protein / WD-40 repeat family protein;(source:Araport11) protein_coding	AT1G04140	143.618	163.518	-0.187327	-1.58726	0.129576	0.281505	Transducin family protein / WD-40 repeat family protein;(source:Araport11) protein_coding	AT1G04140	130.228	116.04	0.167501	1.43307	0.168698	0.264757	Transducin family protein / WD-40 repeat family protein;(source:Araport11) protein_coding
AT1G04160	13.8901	6.43638	1.14737	2.84335	0.01066	0.0304315	Encodes a member of the type XI myosin protein family involved in root hair elongation. protein_coding MYOSIN XI B (XIB) MYOSIN XI B (XIB);MYOSIN XI B (XI-B);MYOSIN XI-8 (XI-8);ARABIDOPSIS THALIANA MYOSIN XI B (ATXIB)	AT1G04160	15.9528	19.0547	-0.288848	-0.921128	0.368965	0.538179	Encodes a member of the type XI myosin protein family involved in root hair elongation. protein_coding MYOSIN XI B (XIB) MYOSIN XI B (XIB);MYOSIN XI B (XI-B);MYOSIN XI-8 (XI-8);ARABIDOPSIS THALIANA MYOSIN XI B (ATXIB)	AT1G04160	6.69262	6.43638	0.097758	0.215737	0.831579	0.902639	Encodes a member of the type XI myosin protein family involved in root hair elongation. protein_coding MYOSIN XI B (XIB) MYOSIN XI B (XIB);MYOSIN XI B (XI-B);MYOSIN XI-8 (XI-8);ARABIDOPSIS THALIANA MYOSIN XI B (ATXIB)	AT1G04160	4.42251	19.0547	-2.22181	-4.92079	0.000105203	0.000631453	Encodes a member of the type XI myosin protein family involved in root hair elongation. protein_coding MYOSIN XI B (XIB) MYOSIN XI B (XIB);MYOSIN XI B (XI-B);MYOSIN XI-8 (XI-8);ARABIDOPSIS THALIANA MYOSIN XI B (ATXIB)
AT1G04170	66.6969	41.5815	0.68063	3.608	0.00196709	0.00793232	protein synthesis initiation factor eIF2 gamma The mRNA is cell-to-cell mobile. protein_coding EUKARYOTIC TRANSLATION INITIATION FACTOR 2 GAMMA SUBUNIT (EIF2 GAMMA) EUKARYOTIC TRANSLATION INITIATION FACTOR 2 GAMMA SUBUNIT (EIF2 GAMMA)	AT1G04170	53.298	54.1206	-0.01787	-0.094212	0.925964	0.955462	protein synthesis initiation factor eIF2 gamma The mRNA is cell-to-cell mobile. protein_coding EUKARYOTIC TRANSLATION INITIATION FACTOR 2 GAMMA SUBUNIT (EIF2 GAMMA) EUKARYOTIC TRANSLATION INITIATION FACTOR 2 GAMMA SUBUNIT (EIF2 GAMMA)	AT1G04170	50.6568	41.5815	0.260861	1.36549	0.188647	0.359126	protein synthesis initiation factor eIF2 gamma The mRNA is cell-to-cell mobile. protein_coding EUKARYOTIC TRANSLATION INITIATION FACTOR 2 GAMMA SUBUNIT (EIF2 GAMMA) EUKARYOTIC TRANSLATION INITIATION FACTOR 2 GAMMA SUBUNIT (EIF2 GAMMA)	AT1G04170	63.0811	54.1206	0.213522	1.13368	0.27156	0.386002	protein synthesis initiation factor eIF2 gamma The mRNA is cell-to-cell mobile. protein_coding EUKARYOTIC TRANSLATION INITIATION FACTOR 2 GAMMA SUBUNIT (EIF2 GAMMA) EUKARYOTIC TRANSLATION INITIATION FACTOR 2 GAMMA SUBUNIT (EIF2 GAMMA)
AT1G04180	2.60559	4.37473	-0.705266	-0.976629	0.341484	0.462417	YUCCA 9;(source:Araport11) protein_coding YUCCA 9 (YUC9) YUCCA 9 (YUC9)	AT1G04180	4.99183	4.30865	1.05946	1.34836	0.193991	0.347294	YUCCA 9;(source:Araport11) protein_coding YUCCA 9 (YUC9) YUCCA 9 (YUC9)	AT1G04180	6.61661	4.37473	0.277011	0.434	0.66936	0.795199	YUCCA 9;(source:Araport11) protein_coding YUCCA 9 (YUC9) YUCCA 9 (YUC9)	AT1G04180	0.0526243	4.30865	-6.28767	-2.39094	0.0277424	0.0616436	YUCCA 9;(source:Araport11) protein_coding YUCCA 9 (YUC9) YUCCA 9 (YUC9)
AT1G04183	3.49927	5.61309	-0.67355	-2.20048	0.0408384	0.0883194	Natural antisense transcript overlaps with AT1G03410;(source:Araport11) antisense_long_noncoding_rna	AT1G04183	6.94809	16.472	-1.20349	-5.05849	7.78525e-05	0.00121317	Natural antisense transcript overlaps with AT1G03410;(source:Araport11) antisense_long_noncoding_rna	AT1G04183	2.13325	5.61309	-1.38297	-3.63956	0.00183273	0.0145958	Natural antisense transcript overlaps with AT1G03410;(source:Araport11) antisense_long_noncoding_rna	AT1G04183	4.67634	16.472	-1.84002	-6.67952	2.64942e-06	3.38338e-05	Natural antisense transcript overlaps with AT1G03410;(source:Araport11) antisense_long_noncoding_rna
AT1G04187	0.251444	0.268662	0.44401	0.29475	0.771502	0.839151	None;(source:Araport11) small_nucleolar_rna	AT1G04187	0.715315	0.326854	1.99867	1.48968	0.153336	0.294914	None;(source:Araport11) small_nucleolar_rna	AT1G04187	0.0959021	0.268662	-1.79224	-0.938782	0.360066	0.541078	None;(source:Araport11) small_nucleolar_rna	AT1G04187	0.85836	0.326854	2.17651	1.63318	0.119512	0.20119	None;(source:Araport11) small_nucleolar_rna
AT1G04190	24.9591	11.6492	1.10104	5.74027	1.80586e-05	0.000183437	Encodes one of the 36 carboxylate clamp (CC)-tetratricopeptide repeat (TPR) proteins (Prasad 2010, Pubmed ID: 20856808) with potential to interact with Hsp90/Hsp70 as co-chaperones. protein_coding TETRATRICOPEPTIDE REPEAT 3 (TPR3) TETRATRICOPEPTIDE REPEAT 3 (TPR3)	AT1G04190	18.6725	16.8646	0.168565	0.875706	0.392536	0.560804	Encodes one of the 36 carboxylate clamp (CC)-tetratricopeptide repeat (TPR) proteins (Prasad 2010, Pubmed ID: 20856808) with potential to interact with Hsp90/Hsp70 as co-chaperones. protein_coding TETRATRICOPEPTIDE REPEAT 3 (TPR3) TETRATRICOPEPTIDE REPEAT 3 (TPR3)	AT1G04190	18.1369	11.6492	0.643361	3.21022	0.00477399	0.0289693	Encodes one of the 36 carboxylate clamp (CC)-tetratricopeptide repeat (TPR) proteins (Prasad 2010, Pubmed ID: 20856808) with potential to interact with Hsp90/Hsp70 as co-chaperones. protein_coding TETRATRICOPEPTIDE REPEAT 3 (TPR3) TETRATRICOPEPTIDE REPEAT 3 (TPR3)	AT1G04190	20.1297	16.8646	0.275318	1.44175	0.166263	0.261563	Encodes one of the 36 carboxylate clamp (CC)-tetratricopeptide repeat (TPR) proteins (Prasad 2010, Pubmed ID: 20856808) with potential to interact with Hsp90/Hsp70 as co-chaperones. protein_coding TETRATRICOPEPTIDE REPEAT 3 (TPR3) TETRATRICOPEPTIDE REPEAT 3 (TPR3)
AT1G04200	34.707	15.3157	1.22518	4.62843	0.000200461	0.0012642	dyggve-melchior-clausen syndrome protein;(source:Araport11) protein_coding	AT1G04200	32.1134	26.9431	0.255944	1.03552	0.313912	0.483075	dyggve-melchior-clausen syndrome protein;(source:Araport11) protein_coding	AT1G04200	25.2688	15.3157	0.747911	2.72921	0.0136268	0.0613328	dyggve-melchior-clausen syndrome protein;(source:Araport11) protein_coding	AT1G04200	59.9036	26.9431	1.13359	4.75951	0.000150011	0.000837767	dyggve-melchior-clausen syndrome protein;(source:Araport11) protein_coding
AT1G04210	31.4932	45.8738	-0.534112	-3.26794	0.00420085	0.0145049	Encodes a putative Raf-related kinase. protein_coding	AT1G04210	36.2482	35.7956	0.0117772	0.0681151	0.946433	0.967811	Encodes a putative Raf-related kinase. protein_coding	AT1G04210	40.4883	45.8738	-0.165897	-1.01412	0.323744	0.505784	Encodes a putative Raf-related kinase. protein_coding	AT1G04210	36.1322	35.7956	0.00809695	0.0467117	0.963249	0.974871	Encodes a putative Raf-related kinase. protein_coding
AT1G04220	7.60243	27.5193	-1.60148	-2.57747	0.0188091	0.0478882	Encodes KCS2, a member of the 3-ketoacyl-CoA synthase family involved in the biosynthesis of VLCFA (very long chain fatty acids). protein_coding 3-KETOACYL-COA SYNTHASE 2 (KCS2) DAISY (DAISY);3-KETOACYL-COA SYNTHASE 2 (KCS2)	AT1G04220	8.53023	13.2933	-0.68963	-0.947619	0.355667	0.525215	Encodes KCS2, a member of the 3-ketoacyl-CoA synthase family involved in the biosynthesis of VLCFA (very long chain fatty acids). protein_coding 3-KETOACYL-COA SYNTHASE 2 (KCS2) DAISY (DAISY);3-KETOACYL-COA SYNTHASE 2 (KCS2)	AT1G04220	25.8013	27.5193	0.158749	0.297583	0.769372	0.864296	Encodes KCS2, a member of the 3-ketoacyl-CoA synthase family involved in the biosynthesis of VLCFA (very long chain fatty acids). protein_coding 3-KETOACYL-COA SYNTHASE 2 (KCS2) DAISY (DAISY);3-KETOACYL-COA SYNTHASE 2 (KCS2)	AT1G04220	2.05291	13.2933	-2.85916	-2.27934	0.0348438	0.0743661	Encodes KCS2, a member of the 3-ketoacyl-CoA synthase family involved in the biosynthesis of VLCFA (very long chain fatty acids). protein_coding 3-KETOACYL-COA SYNTHASE 2 (KCS2) DAISY (DAISY);3-KETOACYL-COA SYNTHASE 2 (KCS2)
AT1G04227	0.330001	0.241904	1.55139	1.29225	0.212347	0.32056	None;(source:Araport11) small_nucleolar_rna	AT1G04227	0.97532	0.185698	3.63164	2.8686	0.010093	0.0425292	None;(source:Araport11) small_nucleolar_rna	AT1G04227	0.274133	0.241904	1.27834	1.02178	0.320202	0.502433	None;(source:Araport11) small_nucleolar_rna	AT1G04227	0.546681	0.185698	2.67933	2.01484	0.05885	0.113785	None;(source:Araport11) small_nucleolar_rna
AT1G04230	7.18595	15.0904	-1.05387	-5.33507	4.27692e-05	0.000363299	rRNA-processing EFG1-like protein (DUF2361);(source:Araport11) protein_coding	AT1G04230	8.78453	7.58028	0.206305	0.84682	0.408031	0.575415	rRNA-processing EFG1-like protein (DUF2361);(source:Araport11) protein_coding	AT1G04230	8.16915	15.0904	-0.865564	-4.28403	0.000431732	0.00506742	rRNA-processing EFG1-like protein (DUF2361);(source:Araport11) protein_coding	AT1G04230	11.4853	7.58028	0.594048	2.52895	0.0208275	0.0486735	rRNA-processing EFG1-like protein (DUF2361);(source:Araport11) protein_coding
AT1G04240	39.1792	20.8518	0.891851	3.60173	0.00199489	0.00802184	SHY2/IAA3 regulates multiple auxin responses in roots. It is induced rapidly by IAA, and has been shown to be phosphorylated by oat phytochrome A in vitro. protein_coding SHORT HYPOCOTYL 2 (SHY2) SHORT HYPOCOTYL 2 (SHY2);INDOLE-3-ACETIC ACID INDUCIBLE 3 (IAA3)	AT1G04240	19.8791	23.3247	-0.160979	-0.590014	0.562394	0.705509	SHY2/IAA3 regulates multiple auxin responses in roots. It is induced rapidly by IAA, and has been shown to be phosphorylated by oat phytochrome A in vitro. protein_coding SHORT HYPOCOTYL 2 (SHY2) SHORT HYPOCOTYL 2 (SHY2);INDOLE-3-ACETIC ACID INDUCIBLE 3 (IAA3)	AT1G04240	14.5473	20.8518	-0.56009	-2.01461	0.0588769	0.167037	SHY2/IAA3 regulates multiple auxin responses in roots. It is induced rapidly by IAA, and has been shown to be phosphorylated by oat phytochrome A in vitro. protein_coding SHORT HYPOCOTYL 2 (SHY2) SHORT HYPOCOTYL 2 (SHY2);INDOLE-3-ACETIC ACID INDUCIBLE 3 (IAA3)	AT1G04240	2.09019	23.3247	-3.44873	-6.1125	8.32481e-06	8.35014e-05	SHY2/IAA3 regulates multiple auxin responses in roots. It is induced rapidly by IAA, and has been shown to be phosphorylated by oat phytochrome A in vitro. protein_coding SHORT HYPOCOTYL 2 (SHY2) SHORT HYPOCOTYL 2 (SHY2);INDOLE-3-ACETIC ACID INDUCIBLE 3 (IAA3)
AT1G04250	3.7216	4.82687	-0.0771332	-0.144942	0.886341	0.92294	Transcription regulator acting as repressor of auxin-inducible gene expression. Auxin-inducible AUX/IAA gene. Short-lived nuclear protein with four conserved domains. Domain III has homology to beta alpha alpha dimerization and DNA binding domains. Involved in auxin signaling and is a positive modulator of natural leaf senescence. Auxin induces the degradation of the protein in a dosage-dependent…	AT1G04250	15.529	10.4262	0.600081	1.73397	0.099733	0.217693	Transcription regulator acting as repressor of auxin-inducible gene expression. Auxin-inducible AUX/IAA gene. Short-lived nuclear protein with four conserved domains. Domain III has homology to beta alpha alpha dimerization and DNA binding domains. Involved in auxin signaling and is a positive modulator of natural leaf senescence. Auxin induces the degradation of the protein in a dosage-dependent…	AT1G04250	3.19867	4.82687	-0.228839	-0.401911	0.692404	0.811651	Transcription regulator acting as repressor of auxin-inducible gene expression. Auxin-inducible AUX/IAA gene. Short-lived nuclear protein with four conserved domains. Domain III has homology to beta alpha alpha dimerization and DNA binding domains. Involved in auxin signaling and is a positive modulator of natural leaf senescence. Auxin induces the degradation of the protein in a dosage-dependent…	AT1G04250	2.26354	10.4262	-2.17694	-3.62256	0.00190395	0.0067694	Transcription regulator acting as repressor of auxin-inducible gene expression. Auxin-inducible AUX/IAA gene. Short-lived nuclear protein with four conserved domains. Domain III has homology to beta alpha alpha dimerization and DNA binding domains. Involved in auxin signaling and is a positive modulator of natural leaf senescence. Auxin induces the degradation of the protein in a dosage-dependent…
AT1G04260	9.73029	6.53208	0.546921	2.17662	0.0428314	0.0916275	Encodes protein that interacts with CaMV movement protein. Colocalizes in the cytoplasm with the movement protein. Has similarity to mammalian proteins (such as the rat PRA1) which have been described as rab acceptors. protein_coding CAMV MOVEMENT PROTEIN INTERACTING PROTEIN 7 (MPI7) MP-INTERACTING 1 (MPI1); (MPI1);PRENYLATED RAB ACCEPTOR 1.D (PRA1.D); (MPIP1);CAMV MOVEMENT PROTEIN INTERACTING PR…	AT1G04260	5.84463	8.18315	-0.541232	-1.89758	0.0736385	0.176303	Encodes protein that interacts with CaMV movement protein. Colocalizes in the cytoplasm with the movement protein. Has similarity to mammalian proteins (such as the rat PRA1) which have been described as rab acceptors. protein_coding CAMV MOVEMENT PROTEIN INTERACTING PROTEIN 7 (MPI7) MP-INTERACTING 1 (MPI1); (MPI1);PRENYLATED RAB ACCEPTOR 1.D (PRA1.D); (MPIP1);CAMV MOVEMENT PROTEIN INTERACTING PR…	AT1G04260	10.9229	6.53208	0.754807	2.96857	0.00812121	0.042642	Encodes protein that interacts with CaMV movement protein. Colocalizes in the cytoplasm with the movement protein. Has similarity to mammalian proteins (such as the rat PRA1) which have been described as rab acceptors. protein_coding CAMV MOVEMENT PROTEIN INTERACTING PROTEIN 7 (MPI7) MP-INTERACTING 1 (MPI1); (MPI1);PRENYLATED RAB ACCEPTOR 1.D (PRA1.D); (MPIP1);CAMV MOVEMENT PROTEIN INTERACTING PR…	AT1G04260	13.135	8.18315	0.689745	2.80545	0.0115686	0.0300525	Encodes protein that interacts with CaMV movement protein. Colocalizes in the cytoplasm with the movement protein. Has similarity to mammalian proteins (such as the rat PRA1) which have been described as rab acceptors. protein_coding CAMV MOVEMENT PROTEIN INTERACTING PROTEIN 7 (MPI7) MP-INTERACTING 1 (MPI1); (MPI1);PRENYLATED RAB ACCEPTOR 1.D (PRA1.D); (MPIP1);CAMV MOVEMENT PROTEIN INTERACTING PR…
AT1G04270	46.8358	29.2668	0.673736	3.58845	0.00205515	0.00821479	Encodes cytosolic ribosomal protein S15. protein_coding CYTOSOLIC RIBOSOMAL PROTEIN S15 (RPS15) CYTOSOLIC RIBOSOMAL PROTEIN S15 (RPS15)	AT1G04270	80.9434	60.0272	0.444775	2.51833	0.0212962	0.0728101	Encodes cytosolic ribosomal protein S15. protein_coding CYTOSOLIC RIBOSOMAL PROTEIN S15 (RPS15) CYTOSOLIC RIBOSOMAL PROTEIN S15 (RPS15)	AT1G04270	36.0335	29.2668	0.298271	1.55152	0.137895	0.293257	Encodes cytosolic ribosomal protein S15. protein_coding CYTOSOLIC RIBOSOMAL PROTEIN S15 (RPS15) CYTOSOLIC RIBOSOMAL PROTEIN S15 (RPS15)	AT1G04270	71.9191	60.0272	0.267253	1.50902	0.148362	0.238902	Encodes cytosolic ribosomal protein S15. protein_coding CYTOSOLIC RIBOSOMAL PROTEIN S15 (RPS15) CYTOSOLIC RIBOSOMAL PROTEIN S15 (RPS15)
AT1G04277	0.266859	0.348578	-0.402941	-0.488059	0.631303	0.727179	None;(source:Araport11) small_nucleolar_rna	AT1G04277	0.516378	0.543156	-0.143393	-0.196142	0.84666	0.908667	None;(source:Araport11) small_nucleolar_rna	AT1G04277	0.702446	0.348578	0.954459	1.29352	0.211917	0.386307	None;(source:Araport11) small_nucleolar_rna	AT1G04277	0.676945	0.543156	0.272614	0.38623	0.703779	0.787674	None;(source:Araport11) small_nucleolar_rna
AT1G04280	28.4837	34.7321	-0.26798	-1.5241	0.144575	0.237052	Encodes a mitochondrial CaM/Ca2+-dependent NAD+ kinase. protein_coding NAD KINASE-CAM DEPENDENT (NADKC) NAD KINASE-CAM DEPENDENT (NADKC)	AT1G04280	28.4948	12.8732	1.2181	5.47784	3.14956e-05	0.000623507	Encodes a mitochondrial CaM/Ca2+-dependent NAD+ kinase. protein_coding NAD KINASE-CAM DEPENDENT (NADKC) NAD KINASE-CAM DEPENDENT (NADKC)	AT1G04280	25.4449	34.7321	-0.448096	-2.46457	0.0238228	0.0910437	Encodes a mitochondrial CaM/Ca2+-dependent NAD+ kinase. protein_coding NAD KINASE-CAM DEPENDENT (NADKC) NAD KINASE-CAM DEPENDENT (NADKC)	AT1G04280	30.9738	12.8732	1.32941	6.00159	1.04658e-05	0.000100113	Encodes a mitochondrial CaM/Ca2+-dependent NAD+ kinase. protein_coding NAD KINASE-CAM DEPENDENT (NADKC) NAD KINASE-CAM DEPENDENT (NADKC)
AT1G04290	5.33227	4.11507	0.350373	0.776859	0.447165	0.565831	Thioesterase superfamily protein;(source:Araport11) protein_coding	AT1G04290	1.1763	7.09089	-2.65176	-3.68931	0.00163928	0.0111908	Thioesterase superfamily protein;(source:Araport11) protein_coding	AT1G04290	5.27544	4.11507	0.359979	0.76981	0.451233	0.625945	Thioesterase superfamily protein;(source:Araport11) protein_coding	AT1G04290	5.01375	7.09089	-0.484151	-1.13996	0.269	0.383217	Thioesterase superfamily protein;(source:Araport11) protein_coding
AT1G04295	1.77006	0.74098	2.80008	2.41023	0.026661	0.0627906	Natural antisense transcript overlaps with AT1G04290;(source:Araport11) antisense_long_noncoding_rna	AT1G04295	1.1898	0.612563	0.951797	0.937941	0.360486	0.529926	Natural antisense transcript overlaps with AT1G04290;(source:Araport11) antisense_long_noncoding_rna	AT1G04295	0.922998	0.74098	1.97291	1.59629	0.127544	0.278625	Natural antisense transcript overlaps with AT1G04290;(source:Araport11) antisense_long_noncoding_rna	AT1G04295	0.397349	0.612563	-0.711746	-0.576652	0.571198	0.677811	Natural antisense transcript overlaps with AT1G04290;(source:Araport11) antisense_long_noncoding_rna
AT1G04300	176.158	270.18	-0.616281	-5.00308	8.78611e-05	0.000647566	Encodes MUSE13, a TRAF domain protein. Regulates the turnover of nucleotide-binding domain and leucine-rich repeat-containing (NLR) immune receptors SNC1 and RPS2. Loss of both MUSE13 and MUSE14 leads to enhanced pathogen resistance, NLR accumulation, and autoimmunity.In addition, MUSE13/14 physically interact with ATG6 and appear to regulate ATG6 ubiquitination and thus formation of autophagosom…	AT1G04300	125.173	145.349	-0.21344	-1.79927	0.0884832	0.200281	Encodes MUSE13, a TRAF domain protein. Regulates the turnover of nucleotide-binding domain and leucine-rich repeat-containing (NLR) immune receptors SNC1 and RPS2. Loss of both MUSE13 and MUSE14 leads to enhanced pathogen resistance, NLR accumulation, and autoimmunity.In addition, MUSE13/14 physically interact with ATG6 and appear to regulate ATG6 ubiquitination and thus formation of autophagosom…	AT1G04300	237.317	270.18	-0.18888	-1.53056	0.142977	0.30009	Encodes MUSE13, a TRAF domain protein. Regulates the turnover of nucleotide-binding domain and leucine-rich repeat-containing (NLR) immune receptors SNC1 and RPS2. Loss of both MUSE13 and MUSE14 leads to enhanced pathogen resistance, NLR accumulation, and autoimmunity.In addition, MUSE13/14 physically interact with ATG6 and appear to regulate ATG6 ubiquitination and thus formation of autophagosom…	AT1G04300	173.644	145.349	0.25382	2.12839	0.047132	0.0951769	Encodes MUSE13, a TRAF domain protein. Regulates the turnover of nucleotide-binding domain and leucine-rich repeat-containing (NLR) immune receptors SNC1 and RPS2. Loss of both MUSE13 and MUSE14 leads to enhanced pathogen resistance, NLR accumulation, and autoimmunity.In addition, MUSE13/14 physically interact with ATG6 and appear to regulate ATG6 ubiquitination and thus formation of autophagosom…
AT1G04310	2.34325	7.04828	-1.6394	-4.45523	0.000294586	0.00173764	encodes an ethylene receptor related to bacterial two-component histidine kinases. protein_coding ETHYLENE RESPONSE SENSOR 2 (ERS2) ETHYLENE RESPONSE SENSOR 2 (ERS2)	AT1G04310	2.17227	1.68672	0.398185	0.647699	0.525221	0.676957	encodes an ethylene receptor related to bacterial two-component histidine kinases. protein_coding ETHYLENE RESPONSE SENSOR 2 (ERS2) ETHYLENE RESPONSE SENSOR 2 (ERS2)	AT1G04310	5.75729	7.04828	-0.315055	-1.03394	0.314633	0.497099	encodes an ethylene receptor related to bacterial two-component histidine kinases. protein_coding ETHYLENE RESPONSE SENSOR 2 (ERS2) ETHYLENE RESPONSE SENSOR 2 (ERS2)	AT1G04310	1.6901	1.68672	0.081775	0.125205	0.901726	0.932956	encodes an ethylene receptor related to bacterial two-component histidine kinases. protein_coding ETHYLENE RESPONSE SENSOR 2 (ERS2) ETHYLENE RESPONSE SENSOR 2 (ERS2)
AT1G04313	0.670633	0.805249	0.319467	0.337268	0.739751	0.814637	None;(source:Araport11) long_noncoding_rna	AT1G04313	0	2.18443	-7.35842	-5.09154	7.24438e-05	0.00114562	None;(source:Araport11) long_noncoding_rna	AT1G04313	0.298614	0.805249	-0.719106	-0.64879	0.524531	0.686273	None;(source:Araport11) long_noncoding_rna	AT1G04313	3.33035	2.18443	0.565146	1.13702	0.270196	0.38447	None;(source:Araport11) long_noncoding_rna
AT1G04340	8.72037	5.16782	0.796051	2.57862	0.0187635	0.0477915	HR-like lesion-inducing protein-like protein;(source:Araport11) protein_coding	AT1G04340	5.52422	5.46437	0.0164725	0.0460421	0.963775	0.97804	HR-like lesion-inducing protein-like protein;(source:Araport11) protein_coding	AT1G04340	5.43842	5.16782	0.0819865	0.239824	0.813132	0.891578	HR-like lesion-inducing protein-like protein;(source:Araport11) protein_coding	AT1G04340	9.64516	5.46437	0.818568	2.53704	0.0204775	0.0479569	HR-like lesion-inducing protein-like protein;(source:Araport11) protein_coding
AT1G04350	18.1113	38.7339	-1.1809	-3.45574	0.00276537	0.0104744	encodes a protein whose sequence is similar to 2-oxoglutarate-dependent dioxygenase protein_coding	AT1G04350	41.5009	43.2916	-0.0543982	-0.168675	0.867902	0.921999	encodes a protein whose sequence is similar to 2-oxoglutarate-dependent dioxygenase protein_coding	AT1G04350	35.2481	38.7339	-0.0557797	-0.171889	0.865411	0.923763	encodes a protein whose sequence is similar to 2-oxoglutarate-dependent dioxygenase protein_coding	AT1G04350	14.5621	43.2916	-1.61556	-4.28068	0.000434979	0.00200048	encodes a protein whose sequence is similar to 2-oxoglutarate-dependent dioxygenase protein_coding
AT1G04353	0.432017	0.0105621	2.73448	1.38305	0.18329	0.285213	Natural antisense transcript overlaps with AT1G05230;(source:Araport11) antisense_long_noncoding_rna	AT1G04353	0.170635	0.1189	-1.42592	-0.664542	0.514629	0.668071	Natural antisense transcript overlaps with AT1G05230;(source:Araport11) antisense_long_noncoding_rna	AT1G04353	0.101883	0.0105621	0.55905	0.238943	0.813805	0.892004	Natural antisense transcript overlaps with AT1G05230;(source:Araport11) antisense_long_noncoding_rna	AT1G04353	1.01001	0.1189	2.79751	1.83735	0.0824479	0.149383	Natural antisense transcript overlaps with AT1G05230;(source:Araport11) antisense_long_noncoding_rna
AT1G04360	2.26256	2.43672	-0.0410167	-0.092277	0.92748	0.951902	RING/U-box superfamily protein;(source:Araport11) protein_coding ARABIDOPSIS TOXICOS EN LEVADURA 1 (ATL1) ARABIDOPSIS TOXICOS EN LEVADURA 1 (ATL1)	AT1G04360	3.00403	1.11089	1.20549	1.99415	0.0612485	0.15535	RING/U-box superfamily protein;(source:Araport11) protein_coding ARABIDOPSIS TOXICOS EN LEVADURA 1 (ATL1) ARABIDOPSIS TOXICOS EN LEVADURA 1 (ATL1)	AT1G04360	1.64003	2.43672	-0.453748	-0.892087	0.383923	0.564384	RING/U-box superfamily protein;(source:Araport11) protein_coding ARABIDOPSIS TOXICOS EN LEVADURA 1 (ATL1) ARABIDOPSIS TOXICOS EN LEVADURA 1 (ATL1)	AT1G04360	0.675474	1.11089	-0.969383	-1.18186	0.252389	0.364432	RING/U-box superfamily protein;(source:Araport11) protein_coding ARABIDOPSIS TOXICOS EN LEVADURA 1 (ATL1) ARABIDOPSIS TOXICOS EN LEVADURA 1 (ATL1)
AT1G04390	7.3887	12.7054	-0.802482	-2.95952	0.00828306	0.0249581	BTB/POZ domain-containing protein;(source:Araport11) protein_coding	AT1G04390	8.15444	7.47607	0.134759	0.404263	0.690703	0.80408	BTB/POZ domain-containing protein;(source:Araport11) protein_coding	AT1G04390	8.37598	12.7054	-0.635884	-2.28639	0.0343498	0.11712	BTB/POZ domain-containing protein;(source:Araport11) protein_coding	AT1G04390	6.88124	7.47607	-0.122126	-0.353312	0.727891	0.807012	BTB/POZ domain-containing protein;(source:Araport11) protein_coding
AT1G04400	228.78	365.319	-0.683159	-4.42822	0.000312867	0.00182428	Blue light receptor mediating blue-light regulated cotyledon expansion and flowering time. Positive regulator of the flowering-time gene CONSTANS. This gene possesses a light-induced CNT2 N-terminal homodimerisation domain.Involved in blue-light induced stomatal opening. Involved in triggering chromatin decondensation. An 80-residue motif (NC80) is sufficient to confer CRY2's physiological functi…	AT1G04400	124.723	202.804	-0.703205	-4.79944	0.000137366	0.00180453	Blue light receptor mediating blue-light regulated cotyledon expansion and flowering time. Positive regulator of the flowering-time gene CONSTANS. This gene possesses a light-induced CNT2 N-terminal homodimerisation domain.Involved in blue-light induced stomatal opening. Involved in triggering chromatin decondensation. An 80-residue motif (NC80) is sufficient to confer CRY2's physiological functi…	AT1G04400	270.343	365.319	-0.435925	-2.83276	0.0109066	0.0522709	Blue light receptor mediating blue-light regulated cotyledon expansion and flowering time. Positive regulator of the flowering-time gene CONSTANS. This gene possesses a light-induced CNT2 N-terminal homodimerisation domain.Involved in blue-light induced stomatal opening. Involved in triggering chromatin decondensation. An 80-residue motif (NC80) is sufficient to confer CRY2's physiological functi…	AT1G04400	144.694	202.804	-0.486175	-3.3145	0.0037882	0.0119531	Blue light receptor mediating blue-light regulated cotyledon expansion and flowering time. Positive regulator of the flowering-time gene CONSTANS. This gene possesses a light-induced CNT2 N-terminal homodimerisation domain.Involved in blue-light induced stomatal opening. Involved in triggering chromatin decondensation. An 80-residue motif (NC80) is sufficient to confer CRY2's physiological functi…
AT1G04410	320.097	321.502	-0.00899515	-0.0666405	0.94759	0.965789	predicted to encode a cytosolic malate dehydrogenase. protein_coding CYTOSOLIC-NAD-DEPENDENT MALATE DEHYDROGENASE 1 (c-NAD-MDH1) CYTOSOLIC-NAD-DEPENDENT MALATE DEHYDROGENASE 1 (c-NAD-MDH1)	AT1G04410	205.125	451.215	-1.1422	-8.64782	6.95734e-08	9.68204e-06	predicted to encode a cytosolic malate dehydrogenase. protein_coding CYTOSOLIC-NAD-DEPENDENT MALATE DEHYDROGENASE 1 (c-NAD-MDH1) CYTOSOLIC-NAD-DEPENDENT MALATE DEHYDROGENASE 1 (c-NAD-MDH1)	AT1G04410	314.945	321.502	-0.0284173	-0.212519	0.83405	0.904317	predicted to encode a cytosolic malate dehydrogenase. protein_coding CYTOSOLIC-NAD-DEPENDENT MALATE DEHYDROGENASE 1 (c-NAD-MDH1) CYTOSOLIC-NAD-DEPENDENT MALATE DEHYDROGENASE 1 (c-NAD-MDH1)	AT1G04410	553.56	451.215	0.292772	2.1441	0.04569	0.0928981	predicted to encode a cytosolic malate dehydrogenase. protein_coding CYTOSOLIC-NAD-DEPENDENT MALATE DEHYDROGENASE 1 (c-NAD-MDH1) CYTOSOLIC-NAD-DEPENDENT MALATE DEHYDROGENASE 1 (c-NAD-MDH1)
AT1G04420	26.4803	52.1409	-1.10876	-3.4028	0.00311215	0.0114981	NAD(P)-linked oxidoreductase superfamily protein;(source:Araport11) protein_coding	AT1G04420	37.752	101.697	-1.51237	-4.73296	0.000159066	0.00200967	NAD(P)-linked oxidoreductase superfamily protein;(source:Araport11) protein_coding	AT1G04420	25.0585	52.1409	-1.08514	-3.25354	0.00433718	0.0270886	NAD(P)-linked oxidoreductase superfamily protein;(source:Araport11) protein_coding	AT1G04420	26.7574	101.697	-2.00277	-5.98798	1.07653e-05	0.000102469	NAD(P)-linked oxidoreductase superfamily protein;(source:Araport11) protein_coding
AT1G04430	135.371	54.4969	1.31175	10.3843	4.1959e-09	2.88749e-07	S-adenosyl-L-methionine-dependent methyltransferases superfamily protein;(source:Araport11) protein_coding	AT1G04430	71.438	84.6355	-0.244318	-1.97681	0.0633264	0.158943	S-adenosyl-L-methionine-dependent methyltransferases superfamily protein;(source:Araport11) protein_coding	AT1G04430	76.1405	54.4969	0.480573	3.84678	0.00115118	0.0103578	S-adenosyl-L-methionine-dependent methyltransferases superfamily protein;(source:Araport11) protein_coding	AT1G04430	23.788	84.6355	-1.82609	-13.4249	6.43113e-11	2.15753e-08	S-adenosyl-L-methionine-dependent methyltransferases superfamily protein;(source:Araport11) protein_coding
AT1G04433	0.335802	0.278689	0.394015	0.308564	0.761137	0.831413	Natural antisense transcript overlaps with AT1G05835;(source:Araport11) antisense_long_noncoding_rna	AT1G04433	0.42232	0.721319	-2.47918	-1.79714	0.0888322	0.200829	Natural antisense transcript overlaps with AT1G05835;(source:Araport11) antisense_long_noncoding_rna	AT1G04433	0.507782	0.278689	-0.161514	-0.116014	0.908905	0.950122	Natural antisense transcript overlaps with AT1G05835;(source:Araport11) antisense_long_noncoding_rna	AT1G04433	0.714874	0.721319	0.0473515	0.0471113	0.962935	0.974706	Natural antisense transcript overlaps with AT1G05835;(source:Araport11) antisense_long_noncoding_rna
AT1G04440	119.438	137.791	-0.206422	-1.25206	0.226312	0.336903	Member of CKL gene family (CKL-C group). protein_coding CASEIN KINASE LIKE 13 (CKL13) CASEIN KINASE LIKE 13 (CKL13)	AT1G04440	91.1299	61.6664	0.559799	3.34836	0.00351336	0.0195688	Member of CKL gene family (CKL-C group). protein_coding CASEIN KINASE LIKE 13 (CKL13) CASEIN KINASE LIKE 13 (CKL13)	AT1G04440	207.813	137.791	0.588224	3.53117	0.0023363	0.0174591	Member of CKL gene family (CKL-C group). protein_coding CASEIN KINASE LIKE 13 (CKL13) CASEIN KINASE LIKE 13 (CKL13)	AT1G04440	79.5515	61.6664	0.365034	2.18023	0.0425243	0.0875127	Member of CKL gene family (CKL-C group). protein_coding CASEIN KINASE LIKE 13 (CKL13) CASEIN KINASE LIKE 13 (CKL13)
AT1G04463	1.58795	1.36871	0.988644	1.36974	0.187339	0.290223	Natural antisense transcript overlaps with AT1G06450;(source:Araport11) antisense_long_noncoding_rna	AT1G04463	0.663318	5.82746	-3.30171	-4.68	0.000178824	0.00220098	Natural antisense transcript overlaps with AT1G06450;(source:Araport11) antisense_long_noncoding_rna	AT1G04463	1.75375	1.36871	1.13053	1.54482	0.139503	0.295406	Natural antisense transcript overlaps with AT1G06450;(source:Araport11) antisense_long_noncoding_rna	AT1G04463	2.11175	5.82746	-1.66347	-3.50023	0.00250371	0.00845794	Natural antisense transcript overlaps with AT1G06450;(source:Araport11) antisense_long_noncoding_rna
AT1G04480	14.2065	8.96775	0.57739	1.71636	0.102971	0.182123	Ribosomal protein L14p/L23e family protein;(source:Araport11) protein_coding	AT1G04480	18.1508	18.4213	-0.0099249	-0.0338657	0.973351	0.983348	Ribosomal protein L14p/L23e family protein;(source:Araport11) protein_coding	AT1G04480	16.6412	8.96775	0.907195	2.69229	0.0147453	0.0648152	Ribosomal protein L14p/L23e family protein;(source:Araport11) protein_coding	AT1G04480	25.4702	18.4213	0.456746	1.6159	0.12322	0.20622	Ribosomal protein L14p/L23e family protein;(source:Araport11) protein_coding
AT1G04490	1.30121	0.821575	2.4196	1.72225	0.101879	0.180498	hypothetical protein (DUF3527);(source:Araport11) protein_coding	AT1G04490	0.77506	0.428607	0.35252	0.26757	0.792022	0.874128	hypothetical protein (DUF3527);(source:Araport11) protein_coding	AT1G04490	1.51003	0.821575	2.92924	2.11234	0.0486489	0.146963	hypothetical protein (DUF3527);(source:Araport11) protein_coding	AT1G04490	2.23528	0.428607	2.32685	2.11861	0.0480506	0.0966724	hypothetical protein (DUF3527);(source:Araport11) protein_coding
AT1G04500	0.530799	2.3215	-3.653	-2.66929	0.0154855	0.0409353	CCT motif family protein;(source:Araport11) protein_coding	AT1G04500	0.306908	0.196955	1.59113	0.743933	0.46636	0.627255	CCT motif family protein;(source:Araport11) protein_coding	AT1G04500	2.97079	2.3215	0.444856	0.640063	0.530062	0.690732	CCT motif family protein;(source:Araport11) protein_coding	AT1G04500	2.03268	0.196955	4.0965	2.20441	0.0405191	0.0841233	CCT motif family protein;(source:Araport11) protein_coding
AT1G04510	21.9116	23.8477	-0.129906	-0.707835	0.487963	0.603354	Encodes MAC3A, a U-box proteins with homology to the yeast and human E3 ubiquitin ligase Prp19. Associated with the MOS4-Associated Complex (MAC). Involved in plant innate immunity. Regulator of flowering time. protein_coding MOS4-ASSOCIATED COMPLEX 3A (MAC3A) MOS4-ASSOCIATED COMPLEX 3A (MAC3A);PLANT U-BOX 59 (PUB59)	AT1G04510	26.3618	28.6794	-0.131147	-0.706633	0.488692	0.645644	Encodes MAC3A, a U-box proteins with homology to the yeast and human E3 ubiquitin ligase Prp19. Associated with the MOS4-Associated Complex (MAC). Involved in plant innate immunity. Regulator of flowering time. protein_coding MOS4-ASSOCIATED COMPLEX 3A (MAC3A) MOS4-ASSOCIATED COMPLEX 3A (MAC3A);PLANT U-BOX 59 (PUB59)	AT1G04510	24.7807	23.8477	0.0552003	0.297342	0.769553	0.864327	Encodes MAC3A, a U-box proteins with homology to the yeast and human E3 ubiquitin ligase Prp19. Associated with the MOS4-Associated Complex (MAC). Involved in plant innate immunity. Regulator of flowering time. protein_coding MOS4-ASSOCIATED COMPLEX 3A (MAC3A) MOS4-ASSOCIATED COMPLEX 3A (MAC3A);PLANT U-BOX 59 (PUB59)	AT1G04510	33.4628	28.6794	0.220298	1.21379	0.240256	0.350523	Encodes MAC3A, a U-box proteins with homology to the yeast and human E3 ubiquitin ligase Prp19. Associated with the MOS4-Associated Complex (MAC). Involved in plant innate immunity. Regulator of flowering time. protein_coding MOS4-ASSOCIATED COMPLEX 3A (MAC3A) MOS4-ASSOCIATED COMPLEX 3A (MAC3A);PLANT U-BOX 59 (PUB59)
AT1G04520	0.871108	0.1827	2.84607	2.191	0.0416198	0.0895865	Encodes a plasmodesmal protein that may be involved in the intercellular movement of molecules through the plasmodesmata. protein_coding PLASMODESMATA-LOCATED PROTEIN 2 (PDLP2) PLASMODESMATA-LOCATED PROTEIN 2 (PDLP2)	AT1G04520	2.74065	4.08851	-0.657649	-1.50811	0.148592	0.289158	Encodes a plasmodesmal protein that may be involved in the intercellular movement of molecules through the plasmodesmata. protein_coding PLASMODESMATA-LOCATED PROTEIN 2 (PDLP2) PLASMODESMATA-LOCATED PROTEIN 2 (PDLP2)	AT1G04520	0.377646	0.1827	1.03199	0.697805	0.494069	0.662012	Encodes a plasmodesmal protein that may be involved in the intercellular movement of molecules through the plasmodesmata. protein_coding PLASMODESMATA-LOCATED PROTEIN 2 (PDLP2) PLASMODESMATA-LOCATED PROTEIN 2 (PDLP2)	AT1G04520	0.353097	4.08851	-3.5247	-4.1458	0.000588375	0.00255107	Encodes a plasmodesmal protein that may be involved in the intercellular movement of molecules through the plasmodesmata. protein_coding PLASMODESMATA-LOCATED PROTEIN 2 (PDLP2) PLASMODESMATA-LOCATED PROTEIN 2 (PDLP2)
AT1G04530	32.1708	34.8965	-0.139655	-0.669991	0.511228	0.623994	Encodes one of the 36 carboxylate clamp (CC)-tetratricopeptide repeat (TPR) proteins (Prasad 2010, Pubmed ID: 20856808) with potential to interact with Hsp90/Hsp70 as co-chaperones. protein_coding TETRATRICOPEPTIDE REPEAT 4 (TPR4) TETRATRICOPEPTIDE REPEAT 4 (TPR4)	AT1G04530	116.168	47.7955	1.29905	6.47676	3.97016e-06	0.000141801	Encodes one of the 36 carboxylate clamp (CC)-tetratricopeptide repeat (TPR) proteins (Prasad 2010, Pubmed ID: 20856808) with potential to interact with Hsp90/Hsp70 as co-chaperones. protein_coding TETRATRICOPEPTIDE REPEAT 4 (TPR4) TETRATRICOPEPTIDE REPEAT 4 (TPR4)	AT1G04530	25.5754	34.8965	-0.474658	-2.18924	0.0417662	0.133423	Encodes one of the 36 carboxylate clamp (CC)-tetratricopeptide repeat (TPR) proteins (Prasad 2010, Pubmed ID: 20856808) with potential to interact with Hsp90/Hsp70 as co-chaperones. protein_coding TETRATRICOPEPTIDE REPEAT 4 (TPR4) TETRATRICOPEPTIDE REPEAT 4 (TPR4)	AT1G04530	84.455	47.7955	0.831132	4.14182	0.000593648	0.00256978	Encodes one of the 36 carboxylate clamp (CC)-tetratricopeptide repeat (TPR) proteins (Prasad 2010, Pubmed ID: 20856808) with potential to interact with Hsp90/Hsp70 as co-chaperones. protein_coding TETRATRICOPEPTIDE REPEAT 4 (TPR4) TETRATRICOPEPTIDE REPEAT 4 (TPR4)
AT1G04550	7.50699	10.2607	-0.443155	-1.66495	0.112945	0.195512	IAA12/BDL plays a role in auxin-mediated processes of apical-basal patterning in the embryo. bdl mutants lack a primary root meristem protein_coding INDOLE-3-ACETIC ACID INDUCIBLE 12 (IAA12) BODENLOS (BDL);INDOLE-3-ACETIC ACID INDUCIBLE 12 (IAA12)	AT1G04550	13.704	11.8601	0.24182	0.957391	0.350845	0.519976	IAA12/BDL plays a role in auxin-mediated processes of apical-basal patterning in the embryo. bdl mutants lack a primary root meristem protein_coding INDOLE-3-ACETIC ACID INDUCIBLE 12 (IAA12) BODENLOS (BDL);INDOLE-3-ACETIC ACID INDUCIBLE 12 (IAA12)	AT1G04550	4.02398	10.2607	-1.38072	-4.25304	0.000462726	0.00528463	IAA12/BDL plays a role in auxin-mediated processes of apical-basal patterning in the embryo. bdl mutants lack a primary root meristem protein_coding INDOLE-3-ACETIC ACID INDUCIBLE 12 (IAA12) BODENLOS (BDL);INDOLE-3-ACETIC ACID INDUCIBLE 12 (IAA12)	AT1G04550	11.4204	11.8601	-0.0288499	-0.109793	0.913768	0.941172	IAA12/BDL plays a role in auxin-mediated processes of apical-basal patterning in the embryo. bdl mutants lack a primary root meristem protein_coding INDOLE-3-ACETIC ACID INDUCIBLE 12 (IAA12) BODENLOS (BDL);INDOLE-3-ACETIC ACID INDUCIBLE 12 (IAA12)
AT1G04555	10.0134	4.42713	1.22831	4.34311	0.000378314	0.00212924	transmembrane protein;(source:Araport11) protein_coding	AT1G04555	6.64875	3.54869	0.960035	2.75813	0.012808	0.0505512	transmembrane protein;(source:Araport11) protein_coding	AT1G04555	5.56822	4.42713	0.339897	1.09027	0.28974	0.471737	transmembrane protein;(source:Araport11) protein_coding	AT1G04555	8.21518	3.54869	1.26378	3.70458	0.00158408	0.0058296	transmembrane protein;(source:Araport11) protein_coding
AT1G04570	2.52275	0.832291	1.478	1.90182	0.0730521	0.139716	Similar to plastid solute transporters. protein_coding	AT1G04570	4.20772	7.05006	-0.882098	-2.14356	0.0457384	0.125681	Similar to plastid solute transporters. protein_coding	AT1G04570	1.20755	0.832291	0.400662	0.451964	0.656604	0.78546	Similar to plastid solute transporters. protein_coding	AT1G04570	4.17755	7.05006	-0.786977	-1.92296	0.070184	0.131369	Similar to plastid solute transporters. protein_coding
AT1G04590	10.9135	5.5077	0.976493	3.63711	0.00184283	0.00752657	PPR containing-like protein;(source:Araport11) protein_coding	AT1G04590	10.6622	9.14852	0.27446	1.09799	0.286441	0.4542	PPR containing-like protein;(source:Araport11) protein_coding	AT1G04590	7.44301	5.5077	0.468889	1.62337	0.121605	0.270783	PPR containing-like protein;(source:Araport11) protein_coding	AT1G04590	7.07968	9.14852	-0.339624	-1.24409	0.229164	0.337962	PPR containing-like protein;(source:Araport11) protein_coding
AT1G04600	1.14331	4.57062	-2.14168	-3.96779	0.000877256	0.00417558	member of Myosin-like proteins protein_coding MYOSIN XI A (XIA) MYOSIN XI A (XIA); (ATXIA)	AT1G04600	5.33916	2.33882	1.05552	2.12194	0.0477361	0.129501	member of Myosin-like proteins protein_coding MYOSIN XI A (XIA) MYOSIN XI A (XIA); (ATXIA)	AT1G04600	1.33105	4.57062	-1.85796	-3.4353	0.00289449	0.020359	member of Myosin-like proteins protein_coding MYOSIN XI A (XIA) MYOSIN XI A (XIA); (ATXIA)	AT1G04600	14.5444	2.33882	2.59883	5.7138	1.90934e-05	0.000160495	member of Myosin-like proteins protein_coding MYOSIN XI A (XIA) MYOSIN XI A (XIA); (ATXIA)
AT1G04620	32.0331	30.5709	0.0731317	0.471758	0.642674	0.737113	Encodes a 7-hydroxymethyl chlorophyll a reductase, an enzyme of the chlorophyll cycle that converts 7-hydroxymethyl chlorophyll a to chlorophyll a. protein_coding 7-HYDROXYMETHYL CHLOROPHYLL A (HMCHL) REDUCTASE (HCAR) 7-HYDROXYMETHYL CHLOROPHYLL A (HMCHL) REDUCTASE (HCAR)	AT1G04620	5.23724	42.7696	-3.04468	-12.8044	1.41264e-10	1.3968e-07	Encodes a 7-hydroxymethyl chlorophyll a reductase, an enzyme of the chlorophyll cycle that converts 7-hydroxymethyl chlorophyll a to chlorophyll a. protein_coding 7-HYDROXYMETHYL CHLOROPHYLL A (HMCHL) REDUCTASE (HCAR) 7-HYDROXYMETHYL CHLOROPHYLL A (HMCHL) REDUCTASE (HCAR)	AT1G04620	29.446	30.5709	-0.0643863	-0.404944	0.690212	0.810467	Encodes a 7-hydroxymethyl chlorophyll a reductase, an enzyme of the chlorophyll cycle that converts 7-hydroxymethyl chlorophyll a to chlorophyll a. protein_coding 7-HYDROXYMETHYL CHLOROPHYLL A (HMCHL) REDUCTASE (HCAR) 7-HYDROXYMETHYL CHLOROPHYLL A (HMCHL) REDUCTASE (HCAR)	AT1G04620	19.3952	42.7696	-1.13069	-6.73031	2.39622e-06	3.1481e-05	Encodes a 7-hydroxymethyl chlorophyll a reductase, an enzyme of the chlorophyll cycle that converts 7-hydroxymethyl chlorophyll a to chlorophyll a. protein_coding 7-HYDROXYMETHYL CHLOROPHYLL A (HMCHL) REDUCTASE (HCAR) 7-HYDROXYMETHYL CHLOROPHYLL A (HMCHL) REDUCTASE (HCAR)
AT1G04630	5.13479	6.88702	-0.462903	-2.0983	0.0500109	0.104071	GRIM-19 protein;(source:Araport11) protein_coding MATERNAL EFFECT EMBRYO ARREST 4 (MEE4) MATERNAL EFFECT EMBRYO ARREST 4 (MEE4)	AT1G04630	5.13107	10.6367	-1.03967	-4.59688	0.000214989	0.00252762	GRIM-19 protein;(source:Araport11) protein_coding MATERNAL EFFECT EMBRYO ARREST 4 (MEE4) MATERNAL EFFECT EMBRYO ARREST 4 (MEE4)	AT1G04630	3.07453	6.88702	-1.19416	-4.51201	0.000259606	0.00342983	GRIM-19 protein;(source:Araport11) protein_coding MATERNAL EFFECT EMBRYO ARREST 4 (MEE4) MATERNAL EFFECT EMBRYO ARREST 4 (MEE4)	AT1G04630	10.8887	10.6367	0.0326659	0.170329	0.86662	0.909614	GRIM-19 protein;(source:Araport11) protein_coding MATERNAL EFFECT EMBRYO ARREST 4 (MEE4) MATERNAL EFFECT EMBRYO ARREST 4 (MEE4)
AT1G04635	2.69625	0.711874	2.80263	3.08922	0.00623474	0.0199204	ribonuclease P family protein / Rpp14 family protein;(source:Araport11) protein_coding EMBRYO DEFECTIVE 1687 (EMB1687) EMBRYO DEFECTIVE 1687 (EMB1687); (ATPOP5);A. THALIANA HOMOLOG OF YEAST POP5 (POP5)	AT1G04635	2.24233	1.66305	0.214006	0.325877	0.748213	0.844347	ribonuclease P family protein / Rpp14 family protein;(source:Araport11) protein_coding EMBRYO DEFECTIVE 1687 (EMB1687) EMBRYO DEFECTIVE 1687 (EMB1687); (ATPOP5);A. THALIANA HOMOLOG OF YEAST POP5 (POP5)	AT1G04635	1.48462	0.711874	1.76069	1.81464	0.0860028	0.215157	ribonuclease P family protein / Rpp14 family protein;(source:Araport11) protein_coding EMBRYO DEFECTIVE 1687 (EMB1687) EMBRYO DEFECTIVE 1687 (EMB1687); (ATPOP5);A. THALIANA HOMOLOG OF YEAST POP5 (POP5)	AT1G04635	0.984727	1.66305	-0.76562	-0.973679	0.342908	0.460388	ribonuclease P family protein / Rpp14 family protein;(source:Araport11) protein_coding EMBRYO DEFECTIVE 1687 (EMB1687) EMBRYO DEFECTIVE 1687 (EMB1687); (ATPOP5);A. THALIANA HOMOLOG OF YEAST POP5 (POP5)
AT1G04640	7.06091	9.94847	-0.489231	-2.19636	0.0411761	0.0888555	Lipoyltransferase, located in mitochondria but not found in chloroplasts protein_coding LIPOYLTRANSFERASE 2 (LIP2) LIPOYLTRANSFERASE 2 (LIP2)	AT1G04640	13.2499	20.8873	-0.647855	-3.41667	0.0030173	0.0174634	Lipoyltransferase, located in mitochondria but not found in chloroplasts protein_coding LIPOYLTRANSFERASE 2 (LIP2) LIPOYLTRANSFERASE 2 (LIP2)	AT1G04640	8.42865	9.94847	-0.264337	-1.1683	0.257677	0.437821	Lipoyltransferase, located in mitochondria but not found in chloroplasts protein_coding LIPOYLTRANSFERASE 2 (LIP2) LIPOYLTRANSFERASE 2 (LIP2)	AT1G04640	12.6943	20.8873	-0.731203	-3.7918	0.00130243	0.00495105	Lipoyltransferase, located in mitochondria but not found in chloroplasts protein_coding LIPOYLTRANSFERASE 2 (LIP2) LIPOYLTRANSFERASE 2 (LIP2)
AT1G04647	2.73243	2.77063	0.883772	1.06276	0.301712	0.42115	Natural antisense transcript overlaps with AT1G08315;(source:Araport11) antisense_long_noncoding_rna	AT1G04647	0.297524	1.61015	-4.41312	-2.25319	0.0367353	0.107516	Natural antisense transcript overlaps with AT1G08315;(source:Araport11) antisense_long_noncoding_rna	AT1G04647	0.796824	2.77063	-0.711725	-0.664327	0.514763	0.678922	Natural antisense transcript overlaps with AT1G08315;(source:Araport11) antisense_long_noncoding_rna	AT1G04647	1.18491	1.61015	-0.37821	-0.370791	0.715049	0.796728	Natural antisense transcript overlaps with AT1G08315;(source:Araport11) antisense_long_noncoding_rna
AT1G04650	0.544007	0.617759	-0.496131	-0.451999	0.65658	0.748314	FLIP is a member of a conserved gene family with wide distribution across taxa. In Arabidopsis, it forms a complex with FIGL1 regulates meiotic crossover formation via RAD51 and DMC1. protein_coding FIDGETIN-LIKE-1 INTERACTING PROTEIN (FLIP) FIDGETIN-LIKE-1 INTERACTING PROTEIN (FLIP)	AT1G04650	0.639688	4.31515	-2.97375	-3.81529	0.0012355	0.00913835	FLIP is a member of a conserved gene family with wide distribution across taxa. In Arabidopsis, it forms a complex with FIGL1 regulates meiotic crossover formation via RAD51 and DMC1. protein_coding FIDGETIN-LIKE-1 INTERACTING PROTEIN (FLIP) FIDGETIN-LIKE-1 INTERACTING PROTEIN (FLIP)	AT1G04650	0.895826	0.617759	0.816173	0.818517	0.42359	0.601606	FLIP is a member of a conserved gene family with wide distribution across taxa. In Arabidopsis, it forms a complex with FIGL1 regulates meiotic crossover formation via RAD51 and DMC1. protein_coding FIDGETIN-LIKE-1 INTERACTING PROTEIN (FLIP) FIDGETIN-LIKE-1 INTERACTING PROTEIN (FLIP)	AT1G04650	3.74998	4.31515	-0.221609	-0.511364	0.615209	0.715972	FLIP is a member of a conserved gene family with wide distribution across taxa. In Arabidopsis, it forms a complex with FIGL1 regulates meiotic crossover formation via RAD51 and DMC1. protein_coding FIDGETIN-LIKE-1 INTERACTING PROTEIN (FLIP) FIDGETIN-LIKE-1 INTERACTING PROTEIN (FLIP)
AT1G04680	42.4401	77.8081	-0.711597	-1.99262	0.0614291	0.122305	Pectin lyase-like superfamily protein;(source:Araport11) protein_coding	AT1G04680	57.2536	90.446	-0.671609	-1.88089	0.0759924	0.180444	Pectin lyase-like superfamily protein;(source:Araport11) protein_coding	AT1G04680	55.4905	77.8081	-0.388119	-1.0839	0.292481	0.47447	Pectin lyase-like superfamily protein;(source:Araport11) protein_coding	AT1G04680	44.3091	90.446	-1.03349	-2.84691	0.0105782	0.0278648	Pectin lyase-like superfamily protein;(source:Araport11) protein_coding
AT1G04690	42.7087	43.7483	-0.0253092	-0.19314	0.848976	0.895532	potassium channel beta subunit 1;(source:Araport11) protein_coding POTASSIUM CHANNEL BETA SUBUNIT 1 (KAB1) (KV-BETA1);POTASSIUM CHANNEL BETA SUBUNIT 1 (KAB1)	AT1G04690	50.0636	47.2265	0.0946114	0.710442	0.486384	0.643612	potassium channel beta subunit 1;(source:Araport11) protein_coding POTASSIUM CHANNEL BETA SUBUNIT 1 (KAB1) (KV-BETA1);POTASSIUM CHANNEL BETA SUBUNIT 1 (KAB1)	AT1G04690	40.0649	43.7483	-0.117162	-0.880242	0.390139	0.570259	potassium channel beta subunit 1;(source:Araport11) protein_coding POTASSIUM CHANNEL BETA SUBUNIT 1 (KAB1) (KV-BETA1);POTASSIUM CHANNEL BETA SUBUNIT 1 (KAB1)	AT1G04690	78.255	47.2265	0.7336	5.60255	2.41552e-05	0.000194265	potassium channel beta subunit 1;(source:Araport11) protein_coding POTASSIUM CHANNEL BETA SUBUNIT 1 (KAB1) (KV-BETA1);POTASSIUM CHANNEL BETA SUBUNIT 1 (KAB1)
AT1G04700	1.07883	1.76765	-0.998287	-1.40896	0.175608	0.276288	PB1 domain-containing protein tyrosine kinase;(source:Araport11) protein_coding	AT1G04700	0.32832	1.28184	-2.17227	-2.10965	0.0489066	0.131918	PB1 domain-containing protein tyrosine kinase;(source:Araport11) protein_coding	AT1G04700	1.3566	1.76765	-0.25024	-0.38569	0.704172	0.819962	PB1 domain-containing protein tyrosine kinase;(source:Araport11) protein_coding	AT1G04700	1.49707	1.28184	0.228733	0.317613	0.754373	0.828065	PB1 domain-containing protein tyrosine kinase;(source:Araport11) protein_coding
AT1G04710	10.4062	11.6311	-0.294022	-0.971605	0.343912	0.464925	EC2.3.1.16 thiolase. Its transcript levels change after inducing MUTE expression in a mute background. protein_coding PEROXISOMAL 3-KETOACYL-COA THIOLASE 4 (PKT4) 3-KETO-ACYL-COA THIOLASE 1 (KAT1);PEROXISOMAL 3-KETOACYL-COA THIOLASE 4 (PKT4)	AT1G04710	18.1699	20.8267	-0.165656	-0.621391	0.542004	0.68974	EC2.3.1.16 thiolase. Its transcript levels change after inducing MUTE expression in a mute background. protein_coding PEROXISOMAL 3-KETOACYL-COA THIOLASE 4 (PKT4) 3-KETO-ACYL-COA THIOLASE 1 (KAT1);PEROXISOMAL 3-KETOACYL-COA THIOLASE 4 (PKT4)	AT1G04710	11.9536	11.6311	0.00166442	0.00548447	0.995683	0.997861	EC2.3.1.16 thiolase. Its transcript levels change after inducing MUTE expression in a mute background. protein_coding PEROXISOMAL 3-KETOACYL-COA THIOLASE 4 (PKT4) 3-KETO-ACYL-COA THIOLASE 1 (KAT1);PEROXISOMAL 3-KETOACYL-COA THIOLASE 4 (PKT4)	AT1G04710	12.6867	20.8267	-0.694328	-2.43281	0.0254454	0.0574296	EC2.3.1.16 thiolase. Its transcript levels change after inducing MUTE expression in a mute background. protein_coding PEROXISOMAL 3-KETOACYL-COA THIOLASE 4 (PKT4) 3-KETO-ACYL-COA THIOLASE 1 (KAT1);PEROXISOMAL 3-KETOACYL-COA THIOLASE 4 (PKT4)
AT1G04730	0.789295	0.466149	1.07443	1.12034	0.277051	0.394548	Necessary for sister chromatid cohesion. Acts in synergy with ETG1. protein_coding CHROMOSOME TRANSMISSION FIDELITY 18 (CTF18) CHROMOSOME TRANSMISSION FIDELITY 18 (CTF18)	AT1G04730	1.68488	8.58143	-2.64316	-5.38704	3.82505e-05	0.000712203	Necessary for sister chromatid cohesion. Acts in synergy with ETG1. protein_coding CHROMOSOME TRANSMISSION FIDELITY 18 (CTF18) CHROMOSOME TRANSMISSION FIDELITY 18 (CTF18)	AT1G04730	0.694928	0.466149	0.946252	0.937068	0.360924	0.541902	Necessary for sister chromatid cohesion. Acts in synergy with ETG1. protein_coding CHROMOSOME TRANSMISSION FIDELITY 18 (CTF18) CHROMOSOME TRANSMISSION FIDELITY 18 (CTF18)	AT1G04730	10.1862	8.58143	0.21824	0.807149	0.429944	0.547359	Necessary for sister chromatid cohesion. Acts in synergy with ETG1. protein_coding CHROMOSOME TRANSMISSION FIDELITY 18 (CTF18) CHROMOSOME TRANSMISSION FIDELITY 18 (CTF18)
AT1G04750	26.9741	15.6648	0.781991	4.19759	0.000523898	0.00277175	Encodes vesicle-associated membrane protein 7B (VAMP7B, or VAMP721). Required for cell plate formation.VAMP721 interacts with KAT1 and KC1 K+ channels, affects channel gating and suppresses the K+ current within the physiological voltage range. Post-transcriptionally regulated by CRT1/2 under ER stress. protein_coding VESICLE-ASSOCIATED MEMBRANE PROTEIN 721 (VAMP721) (AT VAMP7B); (ATVAMP721);VESI…	AT1G04750	21.6992	23.5158	-0.133473	-0.716721	0.482592	0.640467	Encodes vesicle-associated membrane protein 7B (VAMP7B, or VAMP721). Required for cell plate formation.VAMP721 interacts with KAT1 and KC1 K+ channels, affects channel gating and suppresses the K+ current within the physiological voltage range. Post-transcriptionally regulated by CRT1/2 under ER stress. protein_coding VESICLE-ASSOCIATED MEMBRANE PROTEIN 721 (VAMP721) (AT VAMP7B); (ATVAMP721);VESI…	AT1G04750	17.6591	15.6648	0.194254	0.983216	0.338319	0.520472	Encodes vesicle-associated membrane protein 7B (VAMP7B, or VAMP721). Required for cell plate formation.VAMP721 interacts with KAT1 and KC1 K+ channels, affects channel gating and suppresses the K+ current within the physiological voltage range. Post-transcriptionally regulated by CRT1/2 under ER stress. protein_coding VESICLE-ASSOCIATED MEMBRANE PROTEIN 721 (VAMP721) (AT VAMP7B); (ATVAMP721);VESI…	AT1G04750	44.3912	23.5158	0.916619	5.2499	5.13883e-05	0.000358231	Encodes vesicle-associated membrane protein 7B (VAMP7B, or VAMP721). Required for cell plate formation.VAMP721 interacts with KAT1 and KC1 K+ channels, affects channel gating and suppresses the K+ current within the physiological voltage range. Post-transcriptionally regulated by CRT1/2 under ER stress. protein_coding VESICLE-ASSOCIATED MEMBRANE PROTEIN 721 (VAMP721) (AT VAMP7B); (ATVAMP721);VESI…
AT1G04760	1.42854	0.279224	3.24635	2.4504	0.0245342	0.0588363	member of Synaptobrevin -like protein family protein_coding VESICLE-ASSOCIATED MEMBRANE PROTEIN 726 (VAMP726) VESICLE-ASSOCIATED MEMBRANE PROTEIN 726 (ATVAMP726);VESICLE-ASSOCIATED MEMBRANE PROTEIN 726 (VAMP726)	AT1G04760	0.325099	1.62431	-2.48651	-2.22522	0.0388631	0.112068	member of Synaptobrevin -like protein family protein_coding VESICLE-ASSOCIATED MEMBRANE PROTEIN 726 (VAMP726) VESICLE-ASSOCIATED MEMBRANE PROTEIN 726 (ATVAMP726);VESICLE-ASSOCIATED MEMBRANE PROTEIN 726 (VAMP726)	AT1G04760	0.382128	0.279224	0.821691	0.518218	0.610514	0.753023	member of Synaptobrevin -like protein family protein_coding VESICLE-ASSOCIATED MEMBRANE PROTEIN 726 (VAMP726) VESICLE-ASSOCIATED MEMBRANE PROTEIN 726 (ATVAMP726);VESICLE-ASSOCIATED MEMBRANE PROTEIN 726 (VAMP726)	AT1G04760	0.298114	1.62431	-2.64326	-2.34138	0.0307113	0.0669965	member of Synaptobrevin -like protein family protein_coding VESICLE-ASSOCIATED MEMBRANE PROTEIN 726 (VAMP726) VESICLE-ASSOCIATED MEMBRANE PROTEIN 726 (ATVAMP726);VESICLE-ASSOCIATED MEMBRANE PROTEIN 726 (VAMP726)
AT1G04770	2.0191	3.12961	-0.605985	-1.00441	0.328277	0.44898	SDI2 is a member of a small family of TPR proteins in Arabidopsis. Like SDI1 it is induced by low sulfer and appears to play a role in negative regulation of glucosinolate biosynthesis. protein_coding SULFUR DEFICIENCY INDUCED 2 (SDI2) SULFUR DEFICIENCY INDUCED 2 (SDI2)	AT1G04770	33.8435	16.1444	1.05426	3.87347	0.00108421	0.00833087	SDI2 is a member of a small family of TPR proteins in Arabidopsis. Like SDI1 it is induced by low sulfer and appears to play a role in negative regulation of glucosinolate biosynthesis. protein_coding SULFUR DEFICIENCY INDUCED 2 (SDI2) SULFUR DEFICIENCY INDUCED 2 (SDI2)	AT1G04770	2.00827	3.12961	-1.39798	-1.86456	0.0783598	0.202218	SDI2 is a member of a small family of TPR proteins in Arabidopsis. Like SDI1 it is induced by low sulfer and appears to play a role in negative regulation of glucosinolate biosynthesis. protein_coding SULFUR DEFICIENCY INDUCED 2 (SDI2) SULFUR DEFICIENCY INDUCED 2 (SDI2)	AT1G04770	34.8596	16.1444	1.12609	4.14327	0.000591712	0.00256199	SDI2 is a member of a small family of TPR proteins in Arabidopsis. Like SDI1 it is induced by low sulfer and appears to play a role in negative regulation of glucosinolate biosynthesis. protein_coding SULFUR DEFICIENCY INDUCED 2 (SDI2) SULFUR DEFICIENCY INDUCED 2 (SDI2)
AT1G04780	131.444	170.578	-0.375688	-2.72272	0.0138175	0.0374188	Ankyrin repeat family protein;(source:Araport11) protein_coding	AT1G04780	161.366	87.3287	0.883781	6.42979	4.36365e-06	0.000152096	Ankyrin repeat family protein;(source:Araport11) protein_coding	AT1G04780	130.327	170.578	-0.399521	-2.91464	0.0091334	0.0463331	Ankyrin repeat family protein;(source:Araport11) protein_coding	AT1G04780	142.529	87.3287	0.703926	5.14174	6.4954e-05	0.000432727	Ankyrin repeat family protein;(source:Araport11) protein_coding
AT1G04790	18.8389	29.4893	-0.64382	-3.9509	0.000911161	0.00428807	RING/U-box superfamily protein;(source:Araport11) protein_coding	AT1G04790	33.0608	25.4679	0.40188	2.41427	0.0264397	0.0848373	RING/U-box superfamily protein;(source:Araport11) protein_coding	AT1G04790	17.808	29.4893	-0.721247	-4.26397	0.000451544	0.0052037	RING/U-box superfamily protein;(source:Araport11) protein_coding	AT1G04790	25.7365	25.4679	0.0202189	0.118024	0.907334	0.936701	RING/U-box superfamily protein;(source:Araport11) protein_coding
AT1G04800	2.08136	8.6938	-2.48342	-1.40199	0.177649	0.278915	glycine-rich protein;(source:Araport11) protein_coding	AT1G04800	4.05459	19.5754	-4.05189	-2.54071	0.0203204	0.0703604	glycine-rich protein;(source:Araport11) protein_coding	AT1G04800	2.86804	8.6938	-1.16028	-0.909981	0.374659	0.555883	glycine-rich protein;(source:Araport11) protein_coding	AT1G04800	6.01233	19.5754	-3.44757	-2.42058	0.0260971	0.0586046	glycine-rich protein;(source:Araport11) protein_coding
AT1G04810	165.168	97.3846	0.734136	4.51598	0.000257326	0.00155346	26S proteasome regulatory complex, non-ATPase subcomplex, Rpn2/Psmd1 subunit;(source:Araport11) protein_coding	AT1G04810	80.4875	70.1062	0.199673	1.23051	0.234085	0.394346	26S proteasome regulatory complex, non-ATPase subcomplex, Rpn2/Psmd1 subunit;(source:Araport11) protein_coding	AT1G04810	110.44	97.3846	0.168648	1.05506	0.305124	0.486454	26S proteasome regulatory complex, non-ATPase subcomplex, Rpn2/Psmd1 subunit;(source:Araport11) protein_coding	AT1G04810	92.7964	70.1062	0.401133	2.47866	0.0231345	0.0531199	26S proteasome regulatory complex, non-ATPase subcomplex, Rpn2/Psmd1 subunit;(source:Araport11) protein_coding
AT1G04820	31.8711	18.5839	0.69975	2.30725	0.0329246	0.0744686	Encodes an alpha tubulin isoform that is expressed in roots, leaves and flowers. protein_coding TUBULIN ALPHA-4 CHAIN (TUA4) TORTIFOLIA 2 (TOR2);TUBULIN ALPHA-4 CHAIN (TUA4)	AT1G04820	35.8117	88.7244	-1.33367	-5.02653	8.34739e-05	0.00126761	Encodes an alpha tubulin isoform that is expressed in roots, leaves and flowers. protein_coding TUBULIN ALPHA-4 CHAIN (TUA4) TORTIFOLIA 2 (TOR2);TUBULIN ALPHA-4 CHAIN (TUA4)	AT1G04820	36.6957	18.5839	1.02386	3.36635	0.00337548	0.0227278	Encodes an alpha tubulin isoform that is expressed in roots, leaves and flowers. protein_coding TUBULIN ALPHA-4 CHAIN (TUA4) TORTIFOLIA 2 (TOR2);TUBULIN ALPHA-4 CHAIN (TUA4)	AT1G04820	61.0017	88.7244	-0.544621	-2.12797	0.0471709	0.0952391	Encodes an alpha tubulin isoform that is expressed in roots, leaves and flowers. protein_coding TUBULIN ALPHA-4 CHAIN (TUA4) TORTIFOLIA 2 (TOR2);TUBULIN ALPHA-4 CHAIN (TUA4)
AT1G04830	16.7404	21.1715	-0.343897	-2.04517	0.0554868	0.112683	Ypt/Rab-GAP domain of gyp1p superfamily protein;(source:Araport11) protein_coding	AT1G04830	11.4349	13.9921	-0.288302	-1.38806	0.181783	0.332182	Ypt/Rab-GAP domain of gyp1p superfamily protein;(source:Araport11) protein_coding	AT1G04830	19.0972	21.1715	-0.148135	-0.868508	0.396361	0.575859	Ypt/Rab-GAP domain of gyp1p superfamily protein;(source:Araport11) protein_coding	AT1G04830	16.828	13.9921	0.252181	1.28485	0.214868	0.320858	Ypt/Rab-GAP domain of gyp1p superfamily protein;(source:Araport11) protein_coding
AT1G04840	1.83074	1.72103	0.662891	0.779389	0.445711	0.564447	Tetratricopeptide repeat (TPR)-like superfamily protein;(source:Araport11) protein_coding	AT1G04840	1.71675	1.65962	-0.167513	-0.206896	0.838375	0.903698	Tetratricopeptide repeat (TPR)-like superfamily protein;(source:Araport11) protein_coding	AT1G04840	1.78165	1.72103	0.66671	0.765804	0.453555	0.627971	Tetratricopeptide repeat (TPR)-like superfamily protein;(source:Araport11) protein_coding	AT1G04840	2.31241	1.65962	0.456464	0.603382	0.553658	0.662605	Tetratricopeptide repeat (TPR)-like superfamily protein;(source:Araport11) protein_coding
AT1G04850	79.6673	87.5086	-0.139555	-1.15829	0.261633	0.376854	ubiquitin-associated (UBA)/TS-N domain-containing protein;(source:Araport11) protein_coding	AT1G04850	87.6087	56.0243	0.647146	5.22522	5.42043e-05	0.000922406	ubiquitin-associated (UBA)/TS-N domain-containing protein;(source:Araport11) protein_coding	AT1G04850	50.7229	87.5086	-0.785648	-6.44474	4.23422e-06	0.000145161	ubiquitin-associated (UBA)/TS-N domain-containing protein;(source:Araport11) protein_coding	AT1G04850	97.1837	56.0243	0.793093	6.41491	4.49649e-06	5.10118e-05	ubiquitin-associated (UBA)/TS-N domain-containing protein;(source:Araport11) protein_coding
AT1G04860	38.0265	59.7017	-0.661485	-3.60799	0.00196714	0.00793232	Encodes a ubiquitin-specific protease. protein_coding UBIQUITIN-SPECIFIC PROTEASE 2 (UBP2) (ATUBP2);UBIQUITIN-SPECIFIC PROTEASE 2 (UBP2)	AT1G04860	45.6056	41.8647	0.125398	0.651441	0.522857	0.674986	Encodes a ubiquitin-specific protease. protein_coding UBIQUITIN-SPECIFIC PROTEASE 2 (UBP2) (ATUBP2);UBIQUITIN-SPECIFIC PROTEASE 2 (UBP2)	AT1G04860	45.519	59.7017	-0.371311	-2.01848	0.058437	0.166216	Encodes a ubiquitin-specific protease. protein_coding UBIQUITIN-SPECIFIC PROTEASE 2 (UBP2) (ATUBP2);UBIQUITIN-SPECIFIC PROTEASE 2 (UBP2)	AT1G04860	44.7761	41.8647	0.0861541	0.446396	0.660547	0.75471	Encodes a ubiquitin-specific protease. protein_coding UBIQUITIN-SPECIFIC PROTEASE 2 (UBP2) (ATUBP2);UBIQUITIN-SPECIFIC PROTEASE 2 (UBP2)
AT1G04870	14.6084	11.2103	0.309965	1.12325	0.275848	0.393138	Encodes a type I protein arginine methyltransferase based on the At1g04870.2 gene model. PRMT10 can catalyze the asymmetric dimethylation of arginine 3 on histone 4 and can also methylate myelin basic protein in vitro. Mutants lacking PRMT10 flower late due to defects in the autonomous pathway and they have elevated levels of FLC transcripts. protein_coding PROTEIN ARGININE METHYLTRANSFERASE 10 (…	AT1G04870	25.7674	16.6039	0.638206	2.52051	0.0211989	0.0725583	Encodes a type I protein arginine methyltransferase based on the At1g04870.2 gene model. PRMT10 can catalyze the asymmetric dimethylation of arginine 3 on histone 4 and can also methylate myelin basic protein in vitro. Mutants lacking PRMT10 flower late due to defects in the autonomous pathway and they have elevated levels of FLC transcripts. protein_coding PROTEIN ARGININE METHYLTRANSFERASE 10 (…	AT1G04870	12.2645	11.2103	0.120629	0.416979	0.681543	0.804079	Encodes a type I protein arginine methyltransferase based on the At1g04870.2 gene model. PRMT10 can catalyze the asymmetric dimethylation of arginine 3 on histone 4 and can also methylate myelin basic protein in vitro. Mutants lacking PRMT10 flower late due to defects in the autonomous pathway and they have elevated levels of FLC transcripts. protein_coding PROTEIN ARGININE METHYLTRANSFERASE 10 (…	AT1G04870	39.62	16.6039	1.25053	5.10126	7.09285e-05	0.000464459	Encodes a type I protein arginine methyltransferase based on the At1g04870.2 gene model. PRMT10 can catalyze the asymmetric dimethylation of arginine 3 on histone 4 and can also methylate myelin basic protein in vitro. Mutants lacking PRMT10 flower late due to defects in the autonomous pathway and they have elevated levels of FLC transcripts. protein_coding PROTEIN ARGININE METHYLTRANSFERASE 10 (…
AT1G04900	5.65024	2.36114	1.32168	2.386	0.0280262	0.0652289	NADH dehydrogenase ubiquinone complex I, assembly factor-like protein (DUF185);(source:Araport11) protein_coding	AT1G04900	5.51382	3.73401	0.604248	1.17734	0.25414	0.417324	NADH dehydrogenase ubiquinone complex I, assembly factor-like protein (DUF185);(source:Araport11) protein_coding	AT1G04900	1.72482	2.36114	-0.339265	-0.483737	0.634309	0.769916	NADH dehydrogenase ubiquinone complex I, assembly factor-like protein (DUF185);(source:Araport11) protein_coding	AT1G04900	6.24791	3.73401	0.80296	1.60239	0.126185	0.210051	NADH dehydrogenase ubiquinone complex I, assembly factor-like protein (DUF185);(source:Araport11) protein_coding
AT1G04910	28.7643	29.5708	-0.0399575	-0.249024	0.806115	0.864707	O-fucosyltransferase family protein;(source:Araport11) protein_coding	AT1G04910	28.4524	28.5272	0.0126944	0.0746687	0.941288	0.964335	O-fucosyltransferase family protein;(source:Araport11) protein_coding	AT1G04910	29.5828	29.5708	0.00475761	0.0291235	0.977081	0.986766	O-fucosyltransferase family protein;(source:Araport11) protein_coding	AT1G04910	35.4712	28.5272	0.320802	1.92305	0.0701715	0.131358	O-fucosyltransferase family protein;(source:Araport11) protein_coding
AT1G04920	0.799836	1.42801	-0.561623	-0.714765	0.483771	0.599741	Encodes a sucrose-phosphate synthase whose activity is stimulated by Glc-6-P and inhibited by Pi. protein_coding SUCROSE PHOSPHATE SYNTHASE 3F (SPS3F) SUCROSE PHOSPHATE SYNTHASE 3F (ATSPS3F); (ATSPSB);SUCROSE PHOSPHATE SYNTHASE B (SPSB);SUCROSE PHOSPHATE SYNTHASE 3F (SPS3F)	AT1G04920	0.575903	1.78806	-3.82895	-3.14221	0.00554799	0.027429	Encodes a sucrose-phosphate synthase whose activity is stimulated by Glc-6-P and inhibited by Pi. protein_coding SUCROSE PHOSPHATE SYNTHASE 3F (SPS3F) SUCROSE PHOSPHATE SYNTHASE 3F (ATSPS3F); (ATSPSB);SUCROSE PHOSPHATE SYNTHASE B (SPSB);SUCROSE PHOSPHATE SYNTHASE 3F (SPS3F)	AT1G04920	0.269819	1.42801	-2.2543	-2.12119	0.0478071	0.145449	Encodes a sucrose-phosphate synthase whose activity is stimulated by Glc-6-P and inhibited by Pi. protein_coding SUCROSE PHOSPHATE SYNTHASE 3F (SPS3F) SUCROSE PHOSPHATE SYNTHASE 3F (ATSPS3F); (ATSPSB);SUCROSE PHOSPHATE SYNTHASE B (SPSB);SUCROSE PHOSPHATE SYNTHASE 3F (SPS3F)	AT1G04920	0.816842	1.78806	-1.26123	-1.56576	0.134529	0.220772	Encodes a sucrose-phosphate synthase whose activity is stimulated by Glc-6-P and inhibited by Pi. protein_coding SUCROSE PHOSPHATE SYNTHASE 3F (SPS3F) SUCROSE PHOSPHATE SYNTHASE 3F (ATSPS3F); (ATSPSB);SUCROSE PHOSPHATE SYNTHASE B (SPSB);SUCROSE PHOSPHATE SYNTHASE 3F (SPS3F)
AT1G04930	7.42691	5.81594	0.302892	0.812609	0.426885	0.546724	hydroxyproline-rich glycoprotein family protein;(source:Araport11) protein_coding	AT1G04930	4.34975	3.75088	0.22944	0.454007	0.655161	0.777609	hydroxyproline-rich glycoprotein family protein;(source:Araport11) protein_coding	AT1G04930	7.58903	5.81594	0.402712	1.05892	0.303411	0.484627	hydroxyproline-rich glycoprotein family protein;(source:Araport11) protein_coding	AT1G04930	3.71673	3.75088	0.0234023	0.0446766	0.964849	0.975913	hydroxyproline-rich glycoprotein family protein;(source:Araport11) protein_coding
AT1G04933	0.274952	0.629488	-0.754391	-0.472902	0.641873	0.73642	Natural antisense transcript overlaps with AT1G12150;(source:Araport11) antisense_long_noncoding_rna	AT1G04933	0.406812	0.645421	-1.13775	-0.7613	0.456175	0.618873	Natural antisense transcript overlaps with AT1G12150;(source:Araport11) antisense_long_noncoding_rna	AT1G04933	0.839132	0.629488	-0.198009	-0.123927	0.902724	0.947139	Natural antisense transcript overlaps with AT1G12150;(source:Araport11) antisense_long_noncoding_rna	AT1G04933	0.682751	0.645421	-0.102737	-0.0766987	0.939695	0.959043	Natural antisense transcript overlaps with AT1G12150;(source:Araport11) antisense_long_noncoding_rna
AT1G04940	1.60614	0.645772	1.27547	1.5387	0.140985	0.232401	Tic20 is believed to function as a component of the protein-conducting channel at the inner envelope membrane. Genes AT1G04940 and AT1G04945 were switched for the TAIR7 genome release to give consistency with MIPs annotation. The Arabidopsis genome encodes four Tic20 homologous proteins, AT1G04940(Tic20-I), AT2G47840(Tic20-II), AT4G03320(Tic20-IV) and AT5G55710(Tic20-V). protein_coding TRANSLOCON…	AT1G04940	0.518596	1.27903	-1.09965	-1.15902	0.261345	0.425467	Tic20 is believed to function as a component of the protein-conducting channel at the inner envelope membrane. Genes AT1G04940 and AT1G04945 were switched for the TAIR7 genome release to give consistency with MIPs annotation. The Arabidopsis genome encodes four Tic20 homologous proteins, AT1G04940(Tic20-I), AT2G47840(Tic20-II), AT4G03320(Tic20-IV) and AT5G55710(Tic20-V). protein_coding TRANSLOCON…	AT1G04940	1.48931	0.645772	0.860858	0.992294	0.333991	0.516313	Tic20 is believed to function as a component of the protein-conducting channel at the inner envelope membrane. Genes AT1G04940 and AT1G04945 were switched for the TAIR7 genome release to give consistency with MIPs annotation. The Arabidopsis genome encodes four Tic20 homologous proteins, AT1G04940(Tic20-I), AT2G47840(Tic20-II), AT4G03320(Tic20-IV) and AT5G55710(Tic20-V). protein_coding TRANSLOCON…	AT1G04940	0.759573	1.27903	-0.609501	-0.695726	0.495339	0.609865	Tic20 is believed to function as a component of the protein-conducting channel at the inner envelope membrane. Genes AT1G04940 and AT1G04945 were switched for the TAIR7 genome release to give consistency with MIPs annotation. The Arabidopsis genome encodes four Tic20 homologous proteins, AT1G04940(Tic20-I), AT2G47840(Tic20-II), AT4G03320(Tic20-IV) and AT5G55710(Tic20-V). protein_coding TRANSLOCON…
AT1G04945	11.3473	1.56469	2.76897	3.73451	0.00148116	0.00629988	HIT-type Zinc finger family protein;(source:Araport11) protein_coding	AT1G04945	5.96819	4.67209	0.360725	0.667192	0.512973	0.666521	HIT-type Zinc finger family protein;(source:Araport11) protein_coding	AT1G04945	3.71546	1.56469	1.30347	1.616	0.123199	0.272812	HIT-type Zinc finger family protein;(source:Araport11) protein_coding	AT1G04945	10.6529	4.67209	1.19859	2.39933	0.0272673	0.0607964	HIT-type Zinc finger family protein;(source:Araport11) protein_coding
AT1G04950	28.4679	26.0549	0.139593	0.82962	0.417442	0.538004	Encodes one of two Arabidopsis proteins with significant similarity to the histone fold TBP-associated factor TAF6. Mutants are embryo lethal and transmission of the mutant allele through the male gametophyte is significantly reduced. This is due to reduced pollen tube growth of the mutant. protein_coding TATA BOX ASSOCIATED FACTOR II 59 (TAFII59) (ATTAF6);TBP-ASSOCIATED FACTOR 6 (TAF6);TATA BOX …	AT1G04950	21.0383	17.9058	0.231414	1.1879	0.250057	0.412596	Encodes one of two Arabidopsis proteins with significant similarity to the histone fold TBP-associated factor TAF6. Mutants are embryo lethal and transmission of the mutant allele through the male gametophyte is significantly reduced. This is due to reduced pollen tube growth of the mutant. protein_coding TATA BOX ASSOCIATED FACTOR II 59 (TAFII59) (ATTAF6);TBP-ASSOCIATED FACTOR 6 (TAF6);TATA BOX …	AT1G04950	32.4	26.0549	0.339263	1.99807	0.0607876	0.170756	Encodes one of two Arabidopsis proteins with significant similarity to the histone fold TBP-associated factor TAF6. Mutants are embryo lethal and transmission of the mutant allele through the male gametophyte is significantly reduced. This is due to reduced pollen tube growth of the mutant. protein_coding TATA BOX ASSOCIATED FACTOR II 59 (TAFII59) (ATTAF6);TBP-ASSOCIATED FACTOR 6 (TAF6);TATA BOX …	AT1G04950	14.8202	17.9058	-0.263961	-1.28065	0.216305	0.322594	Encodes one of two Arabidopsis proteins with significant similarity to the histone fold TBP-associated factor TAF6. Mutants are embryo lethal and transmission of the mutant allele through the male gametophyte is significantly reduced. This is due to reduced pollen tube growth of the mutant. protein_coding TATA BOX ASSOCIATED FACTOR II 59 (TAFII59) (ATTAF6);TBP-ASSOCIATED FACTOR 6 (TAF6);TATA BOX …
AT1G04960	26.3281	52.0072	-0.983254	-6.20679	6.86133e-06	8.40859e-05	golgin family A protein (DUF1664);(source:Araport11) protein_coding	AT1G04960	50.0507	21.055	1.23381	6.9477	1.56499e-06	7.33293e-05	golgin family A protein (DUF1664);(source:Araport11) protein_coding	AT1G04960	20.1864	52.0072	-1.386	-8.25249	1.3872e-07	9.98521e-06	golgin family A protein (DUF1664);(source:Araport11) protein_coding	AT1G04960	32.7649	21.055	0.628454	3.43976	0.0028658	0.00944949	golgin family A protein (DUF1664);(source:Araport11) protein_coding
AT1G04970	26.5531	51.2418	-0.941556	-5.68423	2.03221e-05	0.00020158	Encodes one of the two LBP/BPI related proteins (AT1G04970/LBR-1, AT3G20270/LBR-2) that bind to LPS directly and regulate PR1 expression. Putative BPI/LBP family protein. protein_coding (LBR-1) (LBR-1)	AT1G04970	10.6819	16.7982	-0.650066	-2.78721	0.0120321	0.0483108	Encodes one of the two LBP/BPI related proteins (AT1G04970/LBR-1, AT3G20270/LBR-2) that bind to LPS directly and regulate PR1 expression. Putative BPI/LBP family protein. protein_coding (LBR-1) (LBR-1)	AT1G04970	47.5197	51.2418	-0.115421	-0.710407	0.486405	0.656189	Encodes one of the two LBP/BPI related proteins (AT1G04970/LBR-1, AT3G20270/LBR-2) that bind to LPS directly and regulate PR1 expression. Putative BPI/LBP family protein. protein_coding (LBR-1) (LBR-1)	AT1G04970	22.5767	16.7982	0.415049	2.00118	0.0604244	0.116347	Encodes one of the two LBP/BPI related proteins (AT1G04970/LBR-1, AT3G20270/LBR-2) that bind to LPS directly and regulate PR1 expression. Putative BPI/LBP family protein. protein_coding (LBR-1) (LBR-1)
AT1G04980	8.45887	3.71381	1.35797	2.06146	0.0537532	0.110007	Encodes a protein disulfide isomerase-like (PDIL) protein, a member of a multigene family within the thioredoxin (TRX) superfamily. Transcript levels for this gene are up-regulated in response to three different chemical inducers of ER stress (dithiothreitol, beta-mercaptoethanol, and tunicamycin). AtIRE1-2 does not appear to be required for this response, but the atbzip60 mutant has a diminished…	AT1G04980	25.2688	6.84026	2.0065	3.86076	0.00111558	0.00851967	Encodes a protein disulfide isomerase-like (PDIL) protein, a member of a multigene family within the thioredoxin (TRX) superfamily. Transcript levels for this gene are up-regulated in response to three different chemical inducers of ER stress (dithiothreitol, beta-mercaptoethanol, and tunicamycin). AtIRE1-2 does not appear to be required for this response, but the atbzip60 mutant has a diminished…	AT1G04980	5.796	3.71381	0.590432	0.815382	0.425336	0.603215	Encodes a protein disulfide isomerase-like (PDIL) protein, a member of a multigene family within the thioredoxin (TRX) superfamily. Transcript levels for this gene are up-regulated in response to three different chemical inducers of ER stress (dithiothreitol, beta-mercaptoethanol, and tunicamycin). AtIRE1-2 does not appear to be required for this response, but the atbzip60 mutant has a diminished…	AT1G04980	140.933	6.84026	4.52998	9.01205	3.74836e-08	1.57893e-06	Encodes a protein disulfide isomerase-like (PDIL) protein, a member of a multigene family within the thioredoxin (TRX) superfamily. Transcript levels for this gene are up-regulated in response to three different chemical inducers of ER stress (dithiothreitol, beta-mercaptoethanol, and tunicamycin). AtIRE1-2 does not appear to be required for this response, but the atbzip60 mutant has a diminished…
AT1G04985	70.7694	46.5621	0.595477	4.16821	0.000559541	0.00291125	triacylglycerol lipase-like protein;(source:Araport11) protein_coding	AT1G04985	41.5915	30.3225	0.455631	2.91111	0.00920383	0.0397623	triacylglycerol lipase-like protein;(source:Araport11) protein_coding	AT1G04985	42.1097	46.5621	-0.14284	-0.979166	0.340262	0.522349	triacylglycerol lipase-like protein;(source:Araport11) protein_coding	AT1G04985	39.4473	30.3225	0.377006	2.39707	0.0273946	0.0609935	triacylglycerol lipase-like protein;(source:Araport11) protein_coding
AT1G04990	31.8246	20.4065	0.64261	3.30136	0.00390039	0.013694	Zinc finger C-x8-C-x5-C-x3-H type family protein;(source:Araport11) protein_coding	AT1G04990	13.5297	40.2	-1.57969	-7.43192	6.20032e-07	3.82961e-05	Zinc finger C-x8-C-x5-C-x3-H type family protein;(source:Araport11) protein_coding	AT1G04990	39.1531	20.4065	0.909661	4.65459	0.000189175	0.00274442	Zinc finger C-x8-C-x5-C-x3-H type family protein;(source:Araport11) protein_coding	AT1G04990	80.169	40.2	0.98273	5.5744	2.5642e-05	0.000204212	Zinc finger C-x8-C-x5-C-x3-H type family protein;(source:Araport11) protein_coding
AT1G05000	3.62457	5.0326	-0.526022	-1.38643	0.182272	0.2842	Encodes an atypical dual-speci&#64257;city phosphatase. protein_coding PLANT AND FUNGI ATYPICAL DUAL-SPECI&#64257;CITY PHOSPHATASE 1 (PFA-DSP1) (AtPFA-DSP1);PLANT AND FUNGI ATYPICAL DUAL-SPECI&#64257;CITY PHOSPHATASE 1 (PFA-DSP1)	AT1G05000	2.17396	0.64598	2.04466	2.30476	0.0330922	0.0998879	Encodes an atypical dual-speci&#64257;city phosphatase. protein_coding PLANT AND FUNGI ATYPICAL DUAL-SPECI&#64257;CITY PHOSPHATASE 1 (PFA-DSP1) (AtPFA-DSP1);PLANT AND FUNGI ATYPICAL DUAL-SPECI&#64257;CITY PHOSPHATASE 1 (PFA-DSP1)	AT1G05000	2.18598	5.0326	-1.10806	-2.44926	0.0245923	0.0927182	Encodes an atypical dual-speci&#64257;city phosphatase. protein_coding PLANT AND FUNGI ATYPICAL DUAL-SPECI&#64257;CITY PHOSPHATASE 1 (PFA-DSP1) (AtPFA-DSP1);PLANT AND FUNGI ATYPICAL DUAL-SPECI&#64257;CITY PHOSPHATASE 1 (PFA-DSP1)	AT1G05000	4.08917	0.64598	2.97278	3.52527	0.00236737	0.00809239	Encodes an atypical dual-speci&#64257;city phosphatase. protein_coding PLANT AND FUNGI ATYPICAL DUAL-SPECI&#64257;CITY PHOSPHATASE 1 (PFA-DSP1) (AtPFA-DSP1);PLANT AND FUNGI ATYPICAL DUAL-SPECI&#64257;CITY PHOSPHATASE 1 (PFA-DSP1)
AT1G05010	131.026	89.6128	0.47392	1.38305	0.183289	0.285213	Encodes 1-aminocyclopropane-1-carboxylate oxidase protein_coding ETHYLENE-FORMING ENZYME (EFE) ETHYLENE-FORMING ENZYME (EFE); (EAT1);ETHYLENE FORMING ENZYME (ACO4)	AT1G05010	115.883	93.6712	0.340082	0.997824	0.331373	0.501242	Encodes 1-aminocyclopropane-1-carboxylate oxidase protein_coding ETHYLENE-FORMING ENZYME (EFE) ETHYLENE-FORMING ENZYME (EFE); (EAT1);ETHYLENE FORMING ENZYME (ACO4)	AT1G05010	116.341	89.6128	0.408701	1.20012	0.245397	0.425105	Encodes 1-aminocyclopropane-1-carboxylate oxidase protein_coding ETHYLENE-FORMING ENZYME (EFE) ETHYLENE-FORMING ENZYME (EFE); (EAT1);ETHYLENE FORMING ENZYME (ACO4)	AT1G05010	452.522	93.6712	2.32794	6.56707	3.31343e-06	3.99034e-05	Encodes 1-aminocyclopropane-1-carboxylate oxidase protein_coding ETHYLENE-FORMING ENZYME (EFE) ETHYLENE-FORMING ENZYME (EFE); (EAT1);ETHYLENE FORMING ENZYME (ACO4)
AT1G05020	0.890445	0.0995519	3.42182	1.88578	0.0752967	0.142932	ENTH/ANTH/VHS superfamily protein;(source:Araport11) protein_coding ANTH PROTEIN 180 (AP180) (PICALM6);ANTH PROTEIN 180 (AP180)	AT1G05020	0.424492	1.11536	-2.84011	-2.00649	0.0598081	0.152479	ENTH/ANTH/VHS superfamily protein;(source:Araport11) protein_coding ANTH PROTEIN 180 (AP180) (PICALM6);ANTH PROTEIN 180 (AP180)	AT1G05020	0.706508	0.0995519	3.59425	1.96784	0.0644246	0.17708	ENTH/ANTH/VHS superfamily protein;(source:Araport11) protein_coding ANTH PROTEIN 180 (AP180) (PICALM6);ANTH PROTEIN 180 (AP180)	AT1G05020	2.41318	1.11536	1.21338	1.46682	0.159396	0.253241	ENTH/ANTH/VHS superfamily protein;(source:Araport11) protein_coding ANTH PROTEIN 180 (AP180) (PICALM6);ANTH PROTEIN 180 (AP180)
AT1G05030	9.13188	10.8202	-0.177275	-0.658388	0.518485	0.629941	Major facilitator superfamily protein;(source:Araport11) protein_coding	AT1G05030	8.62469	13.6128	-0.69314	-2.45279	0.0244128	0.0799567	Major facilitator superfamily protein;(source:Araport11) protein_coding	AT1G05030	10.0108	10.8202	-0.0823811	-0.298833	0.768433	0.863637	Major facilitator superfamily protein;(source:Araport11) protein_coding	AT1G05030	14.7426	13.6128	0.107574	0.419436	0.679779	0.769616	Major facilitator superfamily protein;(source:Araport11) protein_coding
AT1G05055	3.40581	4.29877	-0.294081	-0.654324	0.52104	0.632408	Member of transcription factor TFIIH complex. Involved in transcription and DNA repair and interacts with AtXPD. protein_coding GENERAL TRANSCRIPTION FACTOR II H2 (GTF2H2) GENERAL TRANSCRIPTION FACTOR II H2 (GTF2H2); (ATGTF2H2)	AT1G05055	3.28145	4.27996	-0.447865	-0.889276	0.385392	0.553971	Member of transcription factor TFIIH complex. Involved in transcription and DNA repair and interacts with AtXPD. protein_coding GENERAL TRANSCRIPTION FACTOR II H2 (GTF2H2) GENERAL TRANSCRIPTION FACTOR II H2 (GTF2H2); (ATGTF2H2)	AT1G05055	4.12729	4.29877	0.0256999	0.056776	0.955339	0.976919	Member of transcription factor TFIIH complex. Involved in transcription and DNA repair and interacts with AtXPD. protein_coding GENERAL TRANSCRIPTION FACTOR II H2 (GTF2H2) GENERAL TRANSCRIPTION FACTOR II H2 (GTF2H2); (ATGTF2H2)	AT1G05055	4.67867	4.27996	0.201493	0.434789	0.668798	0.761729	Member of transcription factor TFIIH complex. Involved in transcription and DNA repair and interacts with AtXPD. protein_coding GENERAL TRANSCRIPTION FACTOR II H2 (GTF2H2) GENERAL TRANSCRIPTION FACTOR II H2 (GTF2H2); (ATGTF2H2)
AT1G05060	10.138	11.6501	-0.228088	-1.01293	0.324295	0.445292	coiled-coil protein;(source:Araport11) protein_coding	AT1G05060	13.5553	11.6589	0.231012	0.987998	0.336034	0.505694	coiled-coil protein;(source:Araport11) protein_coding	AT1G05060	14.7009	11.6501	0.307127	1.38948	0.181359	0.350246	coiled-coil protein;(source:Araport11) protein_coding	AT1G05060	19.3938	11.6589	0.739157	3.29993	0.00391281	0.0122926	coiled-coil protein;(source:Araport11) protein_coding
AT1G05065	0.721435	0.4421	0.567008	0.599341	0.556292	0.662088	Member of a large family of putative ligands homologous to the Clavata3 gene. Consists of a single exon. protein_coding CLAVATA3/ESR-RELATED 20 (CLE20) CLAVATA3/ESR-RELATED 20 (CLE20)	AT1G05065	0.335819	0.727056	-1.68891	-1.55278	0.137595	0.27366	Member of a large family of putative ligands homologous to the Clavata3 gene. Consists of a single exon. protein_coding CLAVATA3/ESR-RELATED 20 (CLE20) CLAVATA3/ESR-RELATED 20 (CLE20)	AT1G05065	0.217069	0.4421	-2.38397	-1.70755	0.104624	0.245291	Member of a large family of putative ligands homologous to the Clavata3 gene. Consists of a single exon. protein_coding CLAVATA3/ESR-RELATED 20 (CLE20) CLAVATA3/ESR-RELATED 20 (CLE20)	AT1G05065	0.047191	0.727056	-4.00953	-2.63132	0.0167859	0.0407489	Member of a large family of putative ligands homologous to the Clavata3 gene. Consists of a single exon. protein_coding CLAVATA3/ESR-RELATED 20 (CLE20) CLAVATA3/ESR-RELATED 20 (CLE20)
AT1G05070	6.32659	6.02443	0.0377591	0.117351	0.90786	0.938017	transmembrane protein, putative (DUF1068);(source:Araport11) protein_coding (ELMO2) (ELMO2)	AT1G05070	7.97326	10.5016	-0.394895	-1.34654	0.194566	0.347992	transmembrane protein, putative (DUF1068);(source:Araport11) protein_coding (ELMO2) (ELMO2)	AT1G05070	8.39574	6.02443	0.46093	1.43919	0.166977	0.3329	transmembrane protein, putative (DUF1068);(source:Araport11) protein_coding (ELMO2) (ELMO2)	AT1G05070	7.71227	10.5016	-0.461658	-1.54659	0.139075	0.226834	transmembrane protein, putative (DUF1068);(source:Araport11) protein_coding (ELMO2) (ELMO2)
AT1G05087	0.463217	0.549514	0.0427707	0.0344675	0.972877	0.981934	dentin sialophosphoprotein;(source:Araport11) protein_coding	AT1G05087	0.47692	0.775107	-0.484175	-0.398863	0.694609	0.806863	dentin sialophosphoprotein;(source:Araport11) protein_coding	AT1G05087	0.420975	0.549514	0.154195	0.120806	0.905161	0.948162	dentin sialophosphoprotein;(source:Araport11) protein_coding	AT1G05087	0.876578	0.775107	0.560996	0.516764	0.611508	0.712768	dentin sialophosphoprotein;(source:Araport11) protein_coding
AT1G05100	0.62428	1.19938	-2.27811	-1.66705	0.112523	0.195051	member of MEKK subfamily. Negatively regulated by RGLG1 and RGLG2; involved in drought stress tolerance. protein_coding MITOGEN-ACTIVATED PROTEIN KINASE KINASE KINASE 18 (MAPKKK18) MITOGEN-ACTIVATED PROTEIN KINASE KINASE KINASE 18 (MAPKKK18)	AT1G05100	1.38899	0.514192	2.01401	1.51752	0.146217	0.286108	member of MEKK subfamily. Negatively regulated by RGLG1 and RGLG2; involved in drought stress tolerance. protein_coding MITOGEN-ACTIVATED PROTEIN KINASE KINASE KINASE 18 (MAPKKK18) MITOGEN-ACTIVATED PROTEIN KINASE KINASE KINASE 18 (MAPKKK18)	AT1G05100	0.0692959	1.19938	-4.04547	-2.07252	0.0526044	0.154927	member of MEKK subfamily. Negatively regulated by RGLG1 and RGLG2; involved in drought stress tolerance. protein_coding MITOGEN-ACTIVATED PROTEIN KINASE KINASE KINASE 18 (MAPKKK18) MITOGEN-ACTIVATED PROTEIN KINASE KINASE KINASE 18 (MAPKKK18)	AT1G05100	1.15474	0.514192	1.63186	1.19086	0.248921	0.360505	member of MEKK subfamily. Negatively regulated by RGLG1 and RGLG2; involved in drought stress tolerance. protein_coding MITOGEN-ACTIVATED PROTEIN KINASE KINASE KINASE 18 (MAPKKK18) MITOGEN-ACTIVATED PROTEIN KINASE KINASE KINASE 18 (MAPKKK18)
AT1G05120	17.0702	27.4287	-0.683054	-3.07608	0.0064175	0.0203417	Helicase protein with RING/U-box domain-containing protein;(source:Araport11) protein_coding	AT1G05120	23.697	17.8317	0.419105	1.72406	0.101543	0.220744	Helicase protein with RING/U-box domain-containing protein;(source:Araport11) protein_coding	AT1G05120	15.806	27.4287	-0.815906	-3.51925	0.00239945	0.0177825	Helicase protein with RING/U-box domain-containing protein;(source:Araport11) protein_coding	AT1G05120	35.0744	17.8317	0.977209	4.15273	0.000579298	0.00251869	Helicase protein with RING/U-box domain-containing protein;(source:Araport11) protein_coding
AT1G05140	38.9751	63.2249	-0.697851	-4.94742	9.92377e-05	0.000713774	Peptidase M50 family protein;(source:Araport11) protein_coding	AT1G05140	33.0081	68.1615	-1.04886	-7.10702	1.14998e-06	5.77663e-05	Peptidase M50 family protein;(source:Araport11) protein_coding	AT1G05140	46.6598	63.2249	-0.435794	-3.07729	0.00640042	0.0360523	Peptidase M50 family protein;(source:Araport11) protein_coding	AT1G05140	27.9882	68.1615	-1.29667	-8.57904	7.83363e-08	2.63746e-06	Peptidase M50 family protein;(source:Araport11) protein_coding
AT1G05150	10.2573	26.8166	-1.38861	-8.49895	9.0009e-08	2.84123e-06	Calcium-binding tetratricopeptide family protein;(source:Araport11) protein_coding	AT1G05150	16.2249	26.3692	-0.686295	-4.17542	0.000550573	0.0050432	Calcium-binding tetratricopeptide family protein;(source:Araport11) protein_coding	AT1G05150	13.8848	26.8166	-0.951286	-5.88906	1.32233e-05	0.000358997	Calcium-binding tetratricopeptide family protein;(source:Araport11) protein_coding	AT1G05150	17.0305	26.3692	-0.635786	-3.87451	0.00108166	0.00423268	Calcium-binding tetratricopeptide family protein;(source:Araport11) protein_coding
AT1G05160	13.1522	11.9088	0.238504	0.929584	0.364684	0.486116	Encodes an ent-kaurenoic acid hydroxylase, a member of the CYP88A cytochrome p450 family. protein_coding CYTOCHROME P450, FAMILY 88, SUBFAMILY A, POLYPEPTIDE 3 (CYP88A3) CYTOCHROME P450, FAMILY 88, SUBFAMILY A, POLYPEPTIDE 3 (CYP88A3);ENT-KAURENOIC ACID OXYDASE 1 (KAO1); (ATKAO1)	AT1G05160	9.64087	7.96559	0.391494	1.22227	0.23711	0.397838	Encodes an ent-kaurenoic acid hydroxylase, a member of the CYP88A cytochrome p450 family. protein_coding CYTOCHROME P450, FAMILY 88, SUBFAMILY A, POLYPEPTIDE 3 (CYP88A3) CYTOCHROME P450, FAMILY 88, SUBFAMILY A, POLYPEPTIDE 3 (CYP88A3);ENT-KAURENOIC ACID OXYDASE 1 (KAO1); (ATKAO1)	AT1G05160	10.7887	11.9088	-0.0377791	-0.138772	0.891146	0.940576	Encodes an ent-kaurenoic acid hydroxylase, a member of the CYP88A cytochrome p450 family. protein_coding CYTOCHROME P450, FAMILY 88, SUBFAMILY A, POLYPEPTIDE 3 (CYP88A3) CYTOCHROME P450, FAMILY 88, SUBFAMILY A, POLYPEPTIDE 3 (CYP88A3);ENT-KAURENOIC ACID OXYDASE 1 (KAO1); (ATKAO1)	AT1G05160	7.96278	7.96559	0.105585	0.316175	0.755447	0.82886	Encodes an ent-kaurenoic acid hydroxylase, a member of the CYP88A cytochrome p450 family. protein_coding CYTOCHROME P450, FAMILY 88, SUBFAMILY A, POLYPEPTIDE 3 (CYP88A3) CYTOCHROME P450, FAMILY 88, SUBFAMILY A, POLYPEPTIDE 3 (CYP88A3);ENT-KAURENOIC ACID OXYDASE 1 (KAO1); (ATKAO1)
AT1G05170	7.94947	11.6226	-0.540975	-2.05736	0.0541847	0.110653	Galactosyltransferase family protein;(source:Araport11) protein_coding	AT1G05170	26.1734	19.1818	0.446441	2.04803	0.0551792	0.143919	Galactosyltransferase family protein;(source:Araport11) protein_coding	AT1G05170	10.1997	11.6226	-0.169012	-0.646454	0.526008	0.687671	Galactosyltransferase family protein;(source:Araport11) protein_coding	AT1G05170	32.1508	19.1818	0.752849	3.51337	0.00243121	0.00826249	Galactosyltransferase family protein;(source:Araport11) protein_coding
AT1G05180	30.6728	24.7238	0.315458	1.70745	0.104644	0.184336	Encodes a subunit of the RUB1 activating enzyme that regulates the protein degradation activity of Skp1-Cullin-Fbox complexes, primarily, but not exclusively, affecting auxin responses. Acts alongside AS1 to exclude BP expression from leaves. Promotes degradation of the cytokinin response repressor ARR5. Affects expression of key DNA repair and meiotic genes, signifcant role in DNA repair. protei…	AT1G05180	32.7216	21.4988	0.619782	3.14699	0.00548976	0.0272558	Encodes a subunit of the RUB1 activating enzyme that regulates the protein degradation activity of Skp1-Cullin-Fbox complexes, primarily, but not exclusively, affecting auxin responses. Acts alongside AS1 to exclude BP expression from leaves. Promotes degradation of the cytokinin response repressor ARR5. Affects expression of key DNA repair and meiotic genes, signifcant role in DNA repair. protei…	AT1G05180	23.6664	24.7238	-0.0331483	-0.172298	0.865094	0.923701	Encodes a subunit of the RUB1 activating enzyme that regulates the protein degradation activity of Skp1-Cullin-Fbox complexes, primarily, but not exclusively, affecting auxin responses. Acts alongside AS1 to exclude BP expression from leaves. Promotes degradation of the cytokinin response repressor ARR5. Affects expression of key DNA repair and meiotic genes, signifcant role in DNA repair. protei…	AT1G05180	44.9659	21.4988	1.06995	5.54666	2.7199e-05	0.00021425	Encodes a subunit of the RUB1 activating enzyme that regulates the protein degradation activity of Skp1-Cullin-Fbox complexes, primarily, but not exclusively, affecting auxin responses. Acts alongside AS1 to exclude BP expression from leaves. Promotes degradation of the cytokinin response repressor ARR5. Affects expression of key DNA repair and meiotic genes, signifcant role in DNA repair. protei…
AT1G05190	129.876	198.539	-0.610443	-2.44991	0.0245591	0.0588659	Encodes the plastid 50S ribosomal protein L6. protein_coding EMBRYO DEFECTIVE 2394 (emb2394) (RPL6);EMBRYO DEFECTIVE 2394 (emb2394)	AT1G05190	166.689	373.246	-1.17006	-4.6371	0.000196646	0.00236517	Encodes the plastid 50S ribosomal protein L6. protein_coding EMBRYO DEFECTIVE 2394 (emb2394) (RPL6);EMBRYO DEFECTIVE 2394 (emb2394)	AT1G05190	125.034	198.539	-0.690459	-2.79107	0.0119325	0.0558624	Encodes the plastid 50S ribosomal protein L6. protein_coding EMBRYO DEFECTIVE 2394 (emb2394) (RPL6);EMBRYO DEFECTIVE 2394 (emb2394)	AT1G05190	85.9563	373.246	-2.18887	-8.71437	6.2063e-08	2.25965e-06	Encodes the plastid 50S ribosomal protein L6. protein_coding EMBRYO DEFECTIVE 2394 (emb2394) (RPL6);EMBRYO DEFECTIVE 2394 (emb2394)
AT1G05200	90.1328	86.9371	0.0562618	0.444453	0.661926	0.75223	Encodes a putative glutamate receptor GLR3 with dual localization in plastid and plasma membrane. protein_coding GLUTAMATE RECEPTOR 3.4 (GLR3.4) GLUTAMATE RECEPTOR 3.4 (ATGLR3.4); (GLUR3);GLUTAMATE RECEPTOR 3.4 (GLR3.4)	AT1G05200	79.7524	84.5909	-0.0785527	-0.61717	0.544724	0.691842	Encodes a putative glutamate receptor GLR3 with dual localization in plastid and plasma membrane. protein_coding GLUTAMATE RECEPTOR 3.4 (GLR3.4) GLUTAMATE RECEPTOR 3.4 (ATGLR3.4); (GLUR3);GLUTAMATE RECEPTOR 3.4 (GLR3.4)	AT1G05200	94.0368	86.9371	0.118652	0.938452	0.360231	0.541266	Encodes a putative glutamate receptor GLR3 with dual localization in plastid and plasma membrane. protein_coding GLUTAMATE RECEPTOR 3.4 (GLR3.4) GLUTAMATE RECEPTOR 3.4 (ATGLR3.4); (GLUR3);GLUTAMATE RECEPTOR 3.4 (GLR3.4)	AT1G05200	51.6195	84.5909	-0.708653	-5.47299	3.1823e-05	0.000244124	Encodes a putative glutamate receptor GLR3 with dual localization in plastid and plasma membrane. protein_coding GLUTAMATE RECEPTOR 3.4 (GLR3.4) GLUTAMATE RECEPTOR 3.4 (ATGLR3.4); (GLUR3);GLUTAMATE RECEPTOR 3.4 (GLR3.4)
AT1G05205	4.67496	1.2312	2.25033	3.49866	0.00251248	0.0096508	hexokinase-1 protein;(source:Araport11) protein_coding	AT1G05205	2.19973	2.76347	-0.278599	-0.509566	0.616444	0.748667	hexokinase-1 protein;(source:Araport11) protein_coding	AT1G05205	1.73434	1.2312	0.888693	1.23277	0.233259	0.4117	hexokinase-1 protein;(source:Araport11) protein_coding	AT1G05205	3.91226	2.76347	0.507749	1.04646	0.308971	0.425231	hexokinase-1 protein;(source:Araport11) protein_coding
AT1G05207	0.0404582	0.547594	-3.94782	-2.60455	0.0177646	0.0457433	Natural antisense transcript overlaps with AT1G15820;(source:Araport11) antisense_long_noncoding_rna	AT1G05207	0.818001	0.442489	0.981052	1.0682	0.299315	0.468018	Natural antisense transcript overlaps with AT1G15820;(source:Araport11) antisense_long_noncoding_rna	AT1G05207	0.508808	0.547594	0.570277	0.576127	0.571546	0.72282	Natural antisense transcript overlaps with AT1G15820;(source:Araport11) antisense_long_noncoding_rna	AT1G05207	0.371823	0.442489	-0.498954	-0.46318	0.648695	0.744883	Natural antisense transcript overlaps with AT1G15820;(source:Araport11) antisense_long_noncoding_rna
AT1G05210	0.212069	0.104133	0.245122	0.142611	0.888155	0.924155	Transmembrane protein 97, Putative;(source:Araport11) protein_coding	AT1G05210	0.865829	0.895475	0.0389296	0.0467123	0.963248	0.977769	Transmembrane protein 97, Putative;(source:Araport11) protein_coding	AT1G05210	0.302575	0.104133	1.34449	0.83996	0.411768	0.590587	Transmembrane protein 97, Putative;(source:Araport11) protein_coding	AT1G05210	0.992792	0.895475	0.188121	0.228926	0.821464	0.877454	Transmembrane protein 97, Putative;(source:Araport11) protein_coding
AT1G05230	12.8634	16.488	-0.367215	-2.04928	0.0550448	0.112021	Encodes a homeobox-leucine zipper family protein belonging to the HD-ZIP IV family. Mutants have trichomes that appear glass-like under a dissecting microscope as compared to the wild-type trichomes. The mutations do not affect trichome growth or branch number. protein_coding HOMEODOMAIN GLABROUS 2 (HDG2) HOMEODOMAIN GLABROUS 2 (HDG2)	AT1G05230	11.3201	17.7771	-0.621495	-3.14635	0.00549758	0.0272803	Encodes a homeobox-leucine zipper family protein belonging to the HD-ZIP IV family. Mutants have trichomes that appear glass-like under a dissecting microscope as compared to the wild-type trichomes. The mutations do not affect trichome growth or branch number. protein_coding HOMEODOMAIN GLABROUS 2 (HDG2) HOMEODOMAIN GLABROUS 2 (HDG2)	AT1G05230	19.4367	16.488	0.235131	1.33946	0.196815	0.367979	Encodes a homeobox-leucine zipper family protein belonging to the HD-ZIP IV family. Mutants have trichomes that appear glass-like under a dissecting microscope as compared to the wild-type trichomes. The mutations do not affect trichome growth or branch number. protein_coding HOMEODOMAIN GLABROUS 2 (HDG2) HOMEODOMAIN GLABROUS 2 (HDG2)	AT1G05230	12.1949	17.7771	-0.511866	-2.61229	0.0174761	0.0421251	Encodes a homeobox-leucine zipper family protein belonging to the HD-ZIP IV family. Mutants have trichomes that appear glass-like under a dissecting microscope as compared to the wild-type trichomes. The mutations do not affect trichome growth or branch number. protein_coding HOMEODOMAIN GLABROUS 2 (HDG2) HOMEODOMAIN GLABROUS 2 (HDG2)
AT1G05270	19.7781	25.462	-0.334935	-1.93266	0.0689017	0.133518	TraB family protein;(source:Araport11) protein_coding	AT1G05270	19.497	19.0332	0.00395667	0.0203766	0.983963	0.989971	TraB family protein;(source:Araport11) protein_coding	AT1G05270	16.9819	25.462	-0.551136	-3.03001	0.00710012	0.0387861	TraB family protein;(source:Araport11) protein_coding	AT1G05270	23.6534	19.0332	0.313865	1.65194	0.115597	0.195933	TraB family protein;(source:Araport11) protein_coding
AT1G05300	18.8632	17.8116	-0.192055	-0.484318	0.633904	0.729281	member of Fe(II) transporter isolog family protein_coding ZINC TRANSPORTER 5 PRECURSOR (ZIP5) ZINC TRANSPORTER 5 PRECURSOR (ZIP5)	AT1G05300	13.4808	8.55423	0.686156	1.30248	0.208901	0.36481	member of Fe(II) transporter isolog family protein_coding ZINC TRANSPORTER 5 PRECURSOR (ZIP5) ZINC TRANSPORTER 5 PRECURSOR (ZIP5)	AT1G05300	10.7103	17.8116	-0.711461	-1.63135	0.119901	0.268325	member of Fe(II) transporter isolog family protein_coding ZINC TRANSPORTER 5 PRECURSOR (ZIP5) ZINC TRANSPORTER 5 PRECURSOR (ZIP5)	AT1G05300	19.0046	8.55423	1.16052	2.28106	0.0347231	0.0741721	member of Fe(II) transporter isolog family protein_coding ZINC TRANSPORTER 5 PRECURSOR (ZIP5) ZINC TRANSPORTER 5 PRECURSOR (ZIP5)
AT1G05310	2.29712	1.68584	0.395287	0.54154	0.594666	0.695251	Pectin lyase-like superfamily protein;(source:Araport11) protein_coding	AT1G05310	3.28993	1.80579	0.764367	0.997862	0.331355	0.501242	Pectin lyase-like superfamily protein;(source:Araport11) protein_coding	AT1G05310	2.79978	1.68584	0.423336	0.565126	0.578849	0.728734	Pectin lyase-like superfamily protein;(source:Araport11) protein_coding	AT1G05310	0.684458	1.80579	-2.29172	-1.83536	0.0827547	0.149851	Pectin lyase-like superfamily protein;(source:Araport11) protein_coding
AT1G05320	23.1523	28.2991	-0.319857	-1.06523	0.30062	0.419938	myosin heavy chain, embryonic smooth protein;(source:Araport11) protein_coding PICC-LIKE (PICL) PICC-LIKE (PICL)	AT1G05320	27.7859	29.7904	-0.178256	-0.57471	0.572484	0.713544	myosin heavy chain, embryonic smooth protein;(source:Araport11) protein_coding PICC-LIKE (PICL) PICC-LIKE (PICL)	AT1G05320	22.1076	28.2991	-0.331755	-1.07696	0.295487	0.477326	myosin heavy chain, embryonic smooth protein;(source:Araport11) protein_coding PICC-LIKE (PICL) PICC-LIKE (PICL)	AT1G05320	22.5924	29.7904	-0.428484	-1.35185	0.192892	0.293929	myosin heavy chain, embryonic smooth protein;(source:Araport11) protein_coding PICC-LIKE (PICL) PICC-LIKE (PICL)
AT1G05340	11.4884	7.59135	0.473396	1.35972	0.190433	0.294076	cysteine-rich TM module stress tolerance protein;(source:Araport11) protein_coding CYSTEINE-RICH TRANSMEMBRANE MODULE 1 (ATHCYSTM1) CYSTEINE-RICH TRANSMEMBRANE MODULE 1 (ATHCYSTM1)	AT1G05340	1.35474	0.410886	1.96964	1.37848	0.18467	0.335812	cysteine-rich TM module stress tolerance protein;(source:Araport11) protein_coding CYSTEINE-RICH TRANSMEMBRANE MODULE 1 (ATHCYSTM1) CYSTEINE-RICH TRANSMEMBRANE MODULE 1 (ATHCYSTM1)	AT1G05340	7.7708	7.59135	-0.0466571	-0.122179	0.904089	0.94782	cysteine-rich TM module stress tolerance protein;(source:Araport11) protein_coding CYSTEINE-RICH TRANSMEMBRANE MODULE 1 (ATHCYSTM1) CYSTEINE-RICH TRANSMEMBRANE MODULE 1 (ATHCYSTM1)	AT1G05340	4.28685	0.410886	3.82242	2.89594	0.009512	0.0255405	cysteine-rich TM module stress tolerance protein;(source:Araport11) protein_coding CYSTEINE-RICH TRANSMEMBRANE MODULE 1 (ATHCYSTM1) CYSTEINE-RICH TRANSMEMBRANE MODULE 1 (ATHCYSTM1)
AT1G05350	42.9456	12.6279	1.81615	7.56168	4.86403e-07	1.05986e-05	NAD(P)-binding Rossmann-fold superfamily protein;(source:Araport11) protein_coding	AT1G05350	29.4747	20.8986	0.508775	2.25311	0.0367412	0.107517	NAD(P)-binding Rossmann-fold superfamily protein;(source:Araport11) protein_coding	AT1G05350	18.7011	12.6279	0.640779	2.50927	0.0217034	0.0852839	NAD(P)-binding Rossmann-fold superfamily protein;(source:Araport11) protein_coding	AT1G05350	43.6445	20.8986	1.07608	4.89851	0.000110472	0.000654505	NAD(P)-binding Rossmann-fold superfamily protein;(source:Araport11) protein_coding
AT1G05360	2.75028	2.16937	0.363116	0.815077	0.425506	0.545404	KMS2 encode a endoplasmic reticulum protein involved in the early secretory pathway. protein_coding KILLING ME SLOWLY 2 (KMS2) KILLING ME SLOWLY 2 (KMS2)	AT1G05360	2.31217	3.10591	-0.415275	-0.91083	0.374224	0.54315	KMS2 encode a endoplasmic reticulum protein involved in the early secretory pathway. protein_coding KILLING ME SLOWLY 2 (KMS2) KILLING ME SLOWLY 2 (KMS2)	AT1G05360	3.00811	2.16937	0.444312	0.972952	0.34326	0.525448	KMS2 encode a endoplasmic reticulum protein involved in the early secretory pathway. protein_coding KILLING ME SLOWLY 2 (KMS2) KILLING ME SLOWLY 2 (KMS2)	AT1G05360	2.76523	3.10591	-0.269891	-0.600256	0.555695	0.664366	KMS2 encode a endoplasmic reticulum protein involved in the early secretory pathway. protein_coding KILLING ME SLOWLY 2 (KMS2) KILLING ME SLOWLY 2 (KMS2)
AT1G05370	2.22017	0.76901	3.7764	2.74349	0.0132163	0.036142	Sec14p-like phosphatidylinositol transfer family protein;(source:Araport11) protein_coding	AT1G05370	0.810045	1.65055	-1.13539	-1.22715	0.235314	0.395778	Sec14p-like phosphatidylinositol transfer family protein;(source:Araport11) protein_coding	AT1G05370	1.60734	0.76901	3.15063	2.21159	0.0399401	0.129499	Sec14p-like phosphatidylinositol transfer family protein;(source:Araport11) protein_coding	AT1G05370	0.786772	1.65055	-1.16883	-1.2394	0.230852	0.340052	Sec14p-like phosphatidylinositol transfer family protein;(source:Araport11) protein_coding
AT1G05380	14.2953	86.3162	-2.62391	-15.7859	4.15076e-12	1.48396e-09	Acyl-CoA N-acyltransferase with RING/FYVE/PHD-type zinc finger protein;(source:Araport11) protein_coding	AT1G05380	63.0536	62.8603	0.0073733	0.0483793	0.961938	0.976597	Acyl-CoA N-acyltransferase with RING/FYVE/PHD-type zinc finger protein;(source:Araport11) protein_coding	AT1G05380	23.1783	86.3162	-1.89025	-11.7953	5.43833e-10	1.82446e-07	Acyl-CoA N-acyltransferase with RING/FYVE/PHD-type zinc finger protein;(source:Araport11) protein_coding	AT1G05380	68.1435	62.8603	0.11631	0.765011	0.454016	0.569969	Acyl-CoA N-acyltransferase with RING/FYVE/PHD-type zinc finger protein;(source:Araport11) protein_coding
AT1G05385	28.3556	12.5087	1.17132	5.51203	2.92805e-05	0.0002686	Encodes a Psb27 homolog involved in photosystem II biogenesis. protein_coding LOW PSII ACCUMULATION 19 (LPA19) LOW PSII ACCUMULATION 19 (LPA19); (Psb27-H1)	AT1G05385	18.8817	20.8464	-0.132126	-0.630026	0.536463	0.685615	Encodes a Psb27 homolog involved in photosystem II biogenesis. protein_coding LOW PSII ACCUMULATION 19 (LPA19) LOW PSII ACCUMULATION 19 (LPA19); (Psb27-H1)	AT1G05385	14.8805	12.5087	0.227522	0.992543	0.333873	0.516313	Encodes a Psb27 homolog involved in photosystem II biogenesis. protein_coding LOW PSII ACCUMULATION 19 (LPA19) LOW PSII ACCUMULATION 19 (LPA19); (Psb27-H1)	AT1G05385	5.56863	20.8464	-2.02423	-6.99487	1.42804e-06	2.15837e-05	Encodes a Psb27 homolog involved in photosystem II biogenesis. protein_coding LOW PSII ACCUMULATION 19 (LPA19) LOW PSII ACCUMULATION 19 (LPA19); (Psb27-H1)
AT1G05400	0.916595	0.0950588	4.14194	2.75708	0.0128366	0.035361	hypothetical protein;(source:Araport11) protein_coding	AT1G05400	0.599284	0.450792	-0.0597125	-0.0541876	0.957373	0.974062	hypothetical protein;(source:Araport11) protein_coding	AT1G05400	0.782689	0.0950588	4.23115	2.78434	0.0121066	0.0564382	hypothetical protein;(source:Araport11) protein_coding	AT1G05400	0.390379	0.450792	-0.196252	-0.177677	0.860928	0.906572	hypothetical protein;(source:Araport11) protein_coding
AT1G05410	21.2041	12.3495	0.763586	2.97663	0.00797946	0.0242517	CDPK adapter, putative (DUF1423);(source:Araport11) protein_coding	AT1G05410	11.9324	7.0256	0.770834	2.25099	0.0368989	0.107825	CDPK adapter, putative (DUF1423);(source:Araport11) protein_coding	AT1G05410	7.62416	12.3495	-0.694597	-2.27355	0.0352552	0.119305	CDPK adapter, putative (DUF1423);(source:Araport11) protein_coding	AT1G05410	5.27411	7.0256	-0.405493	-1.01708	0.322371	0.43878	CDPK adapter, putative (DUF1423);(source:Araport11) protein_coding
AT1G05420	1.69214	2.35288	-0.909903	-1.44342	0.1658	0.264239	ovate family protein 12;(source:Araport11) protein_coding OVATE FAMILY PROTEIN 12 (OFP12) OVATE FAMILY PROTEIN 12 (OFP12);ARABIDOPSIS THALIANA OVATE FAMILY PROTEIN 12 (ATOFP12)	AT1G05420	0.870068	0.589764	0.107357	0.0933667	0.926627	0.955834	ovate family protein 12;(source:Araport11) protein_coding OVATE FAMILY PROTEIN 12 (OFP12) OVATE FAMILY PROTEIN 12 (OFP12);ARABIDOPSIS THALIANA OVATE FAMILY PROTEIN 12 (ATOFP12)	AT1G05420	2.04793	2.35288	-0.285025	-0.481904	0.635585	0.770399	ovate family protein 12;(source:Araport11) protein_coding OVATE FAMILY PROTEIN 12 (OFP12) OVATE FAMILY PROTEIN 12 (OFP12);ARABIDOPSIS THALIANA OVATE FAMILY PROTEIN 12 (ATOFP12)	AT1G05420	0.229772	0.589764	-1.38924	-1.00533	0.327841	0.444736	ovate family protein 12;(source:Araport11) protein_coding OVATE FAMILY PROTEIN 12 (OFP12) OVATE FAMILY PROTEIN 12 (OFP12);ARABIDOPSIS THALIANA OVATE FAMILY PROTEIN 12 (ATOFP12)
AT1G05430	31.0201	15.1667	0.919269	3.07832	0.00638594	0.0202691	Hypothetical protein, expression induced by Al. protein_coding	AT1G05430	24.2421	16.2495	0.521639	1.65524	0.11492	0.2408	Hypothetical protein, expression induced by Al. protein_coding	AT1G05430	25.4926	15.1667	0.757043	2.47285	0.0234159	0.0899745	Hypothetical protein, expression induced by Al. protein_coding	AT1G05430	20.2063	16.2495	0.317944	0.986892	0.336562	0.453813	Hypothetical protein, expression induced by Al. protein_coding
AT1G05460	4.89742	18.5008	-2.77424	-4.8065	0.000135247	0.000918426	Encodes a protein with similarity to RNA helicases. Mutants are defective in post-transcriptional gene silencing. protein_coding SILENCING DEFECTIVE (SDE3) SILENCING DEFECTIVE (SDE3)	AT1G05460	23.4869	22.2337	0.0921226	0.241739	0.81167	0.886354	Encodes a protein with similarity to RNA helicases. Mutants are defective in post-transcriptional gene silencing. protein_coding SILENCING DEFECTIVE (SDE3) SILENCING DEFECTIVE (SDE3)	AT1G05460	7.82228	18.5008	-1.28744	-2.81665	0.0112927	0.0537511	Encodes a protein with similarity to RNA helicases. Mutants are defective in post-transcriptional gene silencing. protein_coding SILENCING DEFECTIVE (SDE3) SILENCING DEFECTIVE (SDE3)	AT1G05460	12.3552	22.2337	-0.846066	-1.98898	0.0618615	0.118555	Encodes a protein with similarity to RNA helicases. Mutants are defective in post-transcriptional gene silencing. protein_coding SILENCING DEFECTIVE (SDE3) SILENCING DEFECTIVE (SDE3)
AT1G05470	8.57096	7.79559	0.0306198	0.0899797	0.929281	0.952939	Encodes an inositol polyphosphate 5' phosphatase (5PTase) that is required for the proper recruitment of cells into developing vascular tissue in leaves and cotyledons. It is most similar to Type I 5PTases that are known to cleave a phosphate from IP3 or IP4. cvp2 mutants have elevated levels of IP3 and are hypersensitive to ABA in seed germination assays. protein_coding COTYLEDON VASCULAR PATTER…	AT1G05470	5.67999	9.87541	-0.827603	-2.17284	0.0431545	0.120629	Encodes an inositol polyphosphate 5' phosphatase (5PTase) that is required for the proper recruitment of cells into developing vascular tissue in leaves and cotyledons. It is most similar to Type I 5PTases that are known to cleave a phosphate from IP3 or IP4. cvp2 mutants have elevated levels of IP3 and are hypersensitive to ABA in seed germination assays. protein_coding COTYLEDON VASCULAR PATTER…	AT1G05470	8.31132	7.79559	0.0141716	0.0403821	0.968226	0.982131	Encodes an inositol polyphosphate 5' phosphatase (5PTase) that is required for the proper recruitment of cells into developing vascular tissue in leaves and cotyledons. It is most similar to Type I 5PTases that are known to cleave a phosphate from IP3 or IP4. cvp2 mutants have elevated levels of IP3 and are hypersensitive to ABA in seed germination assays. protein_coding COTYLEDON VASCULAR PATTER…	AT1G05470	2.94561	9.87541	-1.74619	-3.65878	0.00175546	0.00634717	Encodes an inositol polyphosphate 5' phosphatase (5PTase) that is required for the proper recruitment of cells into developing vascular tissue in leaves and cotyledons. It is most similar to Type I 5PTases that are known to cleave a phosphate from IP3 or IP4. cvp2 mutants have elevated levels of IP3 and are hypersensitive to ABA in seed germination assays. protein_coding COTYLEDON VASCULAR PATTER…
AT1G05490	0.07875	0.0105621	1.29204	0.696331	0.494969	0.60917	Involved in gene silencing. Locus-specific regulator of 24nt-siRNA expression, works together with CLSY1-4 as the master regulators of essentially all Pol-IV-dependent 24nt-siRNAs. protein_coding CHROMATIN REMODELING 31 (chr31) CHROMATIN REMODELING 31 (chr31);CLASSY3 (CLSY3)	AT1G05490	0.649325	0.356016	1.1206	0.969355	0.345003	0.514328	Involved in gene silencing. Locus-specific regulator of 24nt-siRNA expression, works together with CLSY1-4 as the master regulators of essentially all Pol-IV-dependent 24nt-siRNAs. protein_coding CHROMATIN REMODELING 31 (chr31) CHROMATIN REMODELING 31 (chr31);CLASSY3 (CLSY3)	AT1G05490	0.168945	0.0105621	2.20623	1.23234	0.233418	0.41185	Involved in gene silencing. Locus-specific regulator of 24nt-siRNA expression, works together with CLSY1-4 as the master regulators of essentially all Pol-IV-dependent 24nt-siRNAs. protein_coding CHROMATIN REMODELING 31 (chr31) CHROMATIN REMODELING 31 (chr31);CLASSY3 (CLSY3)	AT1G05490	0.466206	0.356016	0.835489	0.707104	0.488407	0.603188	Involved in gene silencing. Locus-specific regulator of 24nt-siRNA expression, works together with CLSY1-4 as the master regulators of essentially all Pol-IV-dependent 24nt-siRNAs. protein_coding CHROMATIN REMODELING 31 (chr31) CHROMATIN REMODELING 31 (chr31);CLASSY3 (CLSY3)
AT1G05500	26.7076	25.1254	0.0893473	0.690654	0.498448	0.612409	Encodes a endomembrane-localized synaptotagmin. Synaptotagmin family proteins are calcium sensors that regulate exocytosis in mammalian cells. protein_coding (NTMC2T2.1) SYNAPTOTAGMIN HOMOLOG E (SYTE); (NTMC2TYPE2.1);SYNAPTOTAGMIN 5 (SYT5); (NTMC2T2.1);ARABIDOPSIS THALIANA SYNAPTOTAGMIN HOMOLOG E (ATSYTE)	AT1G05500	33.2307	30.6111	0.126266	0.972048	0.343697	0.512993	Encodes a endomembrane-localized synaptotagmin. Synaptotagmin family proteins are calcium sensors that regulate exocytosis in mammalian cells. protein_coding (NTMC2T2.1) SYNAPTOTAGMIN HOMOLOG E (SYTE); (NTMC2TYPE2.1);SYNAPTOTAGMIN 5 (SYT5); (NTMC2T2.1);ARABIDOPSIS THALIANA SYNAPTOTAGMIN HOMOLOG E (ATSYTE)	AT1G05500	23.0853	25.1254	-0.130492	-0.973653	0.342921	0.525121	Encodes a endomembrane-localized synaptotagmin. Synaptotagmin family proteins are calcium sensors that regulate exocytosis in mammalian cells. protein_coding (NTMC2T2.1) SYNAPTOTAGMIN HOMOLOG E (SYTE); (NTMC2TYPE2.1);SYNAPTOTAGMIN 5 (SYT5); (NTMC2T2.1);ARABIDOPSIS THALIANA SYNAPTOTAGMIN HOMOLOG E (ATSYTE)	AT1G05500	28.3617	30.6111	-0.107425	-0.81149	0.427511	0.545181	Encodes a endomembrane-localized synaptotagmin. Synaptotagmin family proteins are calcium sensors that regulate exocytosis in mammalian cells. protein_coding (NTMC2T2.1) SYNAPTOTAGMIN HOMOLOG E (SYTE); (NTMC2TYPE2.1);SYNAPTOTAGMIN 5 (SYT5); (NTMC2T2.1);ARABIDOPSIS THALIANA SYNAPTOTAGMIN HOMOLOG E (ATSYTE)
AT1G05520	31.0295	43.9279	-0.491524	-3.0848	0.00629567	0.0200605	Sec23/Sec24 protein transport family protein;(source:Araport11) protein_coding (ATSEC23B) (ATSEC23B)	AT1G05520	40.5864	40.7259	0.0117022	0.0713968	0.943856	0.965901	Sec23/Sec24 protein transport family protein;(source:Araport11) protein_coding (ATSEC23B) (ATSEC23B)	AT1G05520	34.7979	43.9279	-0.321566	-1.99807	0.0607872	0.170756	Sec23/Sec24 protein transport family protein;(source:Araport11) protein_coding (ATSEC23B) (ATSEC23B)	AT1G05520	72.8972	40.7259	0.851511	5.34362	4.19894e-05	0.000302939	Sec23/Sec24 protein transport family protein;(source:Araport11) protein_coding (ATSEC23B) (ATSEC23B)
AT1G05540	2.60647	3.26103	-0.508156	-0.845571	0.408709	0.529937	hypothetical protein (DUF295);(source:Araport11) protein_coding DUF295 ORGANELLAR A 1 (ATDOA1) DUF295 ORGANELLAR A 1 (ATDOA1)	AT1G05540	2.16763	6.53059	-1.69747	-3.00211	0.00754734	0.0342945	hypothetical protein (DUF295);(source:Araport11) protein_coding DUF295 ORGANELLAR A 1 (ATDOA1) DUF295 ORGANELLAR A 1 (ATDOA1)	AT1G05540	3.21384	3.26103	0.225094	0.395138	0.697308	0.815205	hypothetical protein (DUF295);(source:Araport11) protein_coding DUF295 ORGANELLAR A 1 (ATDOA1) DUF295 ORGANELLAR A 1 (ATDOA1)	AT1G05540	0.826989	6.53059	-3.32879	-3.79172	0.00130266	0.00495105	hypothetical protein (DUF295);(source:Araport11) protein_coding DUF295 ORGANELLAR A 1 (ATDOA1) DUF295 ORGANELLAR A 1 (ATDOA1)
AT1G05560	4.13854	25.9858	-2.64384	-5.61207	2.36723e-05	0.000228067	A UDP-glucose transferase localized in the phragmoplast. It has been co-purified with the callose synthase complex and may transfer UDP-glucose from sucrose synthase to the callose synthase and thus help form a substrate channel for the synthesis of callose at the forming cell plate. Induced by salicylic acid. Independent of NPR1 for their induction by salicylic acid. UGT1 encodes a protein with …	AT1G05560	17.1944	32.6851	-0.934998	-2.66398	0.0156615	0.0581601	A UDP-glucose transferase localized in the phragmoplast. It has been co-purified with the callose synthase complex and may transfer UDP-glucose from sucrose synthase to the callose synthase and thus help form a substrate channel for the synthesis of callose at the forming cell plate. Induced by salicylic acid. Independent of NPR1 for their induction by salicylic acid. UGT1 encodes a protein with …	AT1G05560	14.6711	25.9858	-0.989842	-2.69384	0.0146964	0.064691	A UDP-glucose transferase localized in the phragmoplast. It has been co-purified with the callose synthase complex and may transfer UDP-glucose from sucrose synthase to the callose synthase and thus help form a substrate channel for the synthesis of callose at the forming cell plate. Induced by salicylic acid. Independent of NPR1 for their induction by salicylic acid. UGT1 encodes a protein with …	AT1G05560	26.8332	32.6851	-0.287746	-0.870668	0.395211	0.51358	A UDP-glucose transferase localized in the phragmoplast. It has been co-purified with the callose synthase complex and may transfer UDP-glucose from sucrose synthase to the callose synthase and thus help form a substrate channel for the synthesis of callose at the forming cell plate. Induced by salicylic acid. Independent of NPR1 for their induction by salicylic acid. UGT1 encodes a protein with …
AT1G05562	19.9164	24.51	-0.283615	-1.37837	0.184704	0.286898	Natural antisense transcript overlaps with AT1G05560;(source:Araport11) antisense_long_noncoding_rna	AT1G05562	12.7281	36.4317	-1.51083	-6.63415	2.89898e-06	0.000113229	Natural antisense transcript overlaps with AT1G05560;(source:Araport11) antisense_long_noncoding_rna	AT1G05562	19.1646	24.51	-0.382108	-1.79343	0.089442	0.220618	Natural antisense transcript overlaps with AT1G05560;(source:Araport11) antisense_long_noncoding_rna	AT1G05562	7.44083	36.4317	-2.35831	-8.64823	6.95235e-08	2.42776e-06	Natural antisense transcript overlaps with AT1G05560;(source:Araport11) antisense_long_noncoding_rna
AT1G05570	63.2676	117.965	-0.873228	-4.07841	0.000684367	0.00341163	Encodes a callose synthase 1 catalytic subunit . Member of Glycosyltransferase Family- 48. protein_coding CALLOSE SYNTHASE 1 (CALS1) CALLOSE SYNTHASE 1 (CALS1); (GSL06);GLUCAN SYNTHASE-LIKE 6 (GSL6); (ATGSL06); (ATGSL6)	AT1G05570	157.139	115.603	0.429198	1.98993	0.0617484	0.156162	Encodes a callose synthase 1 catalytic subunit . Member of Glycosyltransferase Family- 48. protein_coding CALLOSE SYNTHASE 1 (CALS1) CALLOSE SYNTHASE 1 (CALS1); (GSL06);GLUCAN SYNTHASE-LIKE 6 (GSL6); (ATGSL06); (ATGSL6)	AT1G05570	89.4583	117.965	-0.369124	-1.72195	0.101934	0.240884	Encodes a callose synthase 1 catalytic subunit . Member of Glycosyltransferase Family- 48. protein_coding CALLOSE SYNTHASE 1 (CALS1) CALLOSE SYNTHASE 1 (CALS1); (GSL06);GLUCAN SYNTHASE-LIKE 6 (GSL6); (ATGSL06); (ATGSL6)	AT1G05570	550.689	115.603	2.26708	10.0693	6.80783e-09	4.90565e-07	Encodes a callose synthase 1 catalytic subunit . Member of Glycosyltransferase Family- 48. protein_coding CALLOSE SYNTHASE 1 (CALS1) CALLOSE SYNTHASE 1 (CALS1); (GSL06);GLUCAN SYNTHASE-LIKE 6 (GSL6); (ATGSL06); (ATGSL6)
AT1G05575	1.28065	0.255542	1.96524	1.93838	0.0681558	0.132412	transmembrane protein;(source:Araport11) protein_coding HYPOXIA RESPONSE UNKNOWN PROTEIN 17 (HUP17) HYPOXIA RESPONSE UNKNOWN PROTEIN 17 (HUP17)	AT1G05575	1.40178	0.410632	1.97786	1.97675	0.0633334	0.158943	transmembrane protein;(source:Araport11) protein_coding HYPOXIA RESPONSE UNKNOWN PROTEIN 17 (HUP17) HYPOXIA RESPONSE UNKNOWN PROTEIN 17 (HUP17)	AT1G05575	1.24436	0.255542	2.02987	1.97893	0.063068	0.174526	transmembrane protein;(source:Araport11) protein_coding HYPOXIA RESPONSE UNKNOWN PROTEIN 17 (HUP17) HYPOXIA RESPONSE UNKNOWN PROTEIN 17 (HUP17)	AT1G05575	2.26658	0.410632	2.80825	2.94321	0.0085829	0.0235191	transmembrane protein;(source:Araport11) protein_coding HYPOXIA RESPONSE UNKNOWN PROTEIN 17 (HUP17) HYPOXIA RESPONSE UNKNOWN PROTEIN 17 (HUP17)
AT1G05590	15.2398	16.5859	-0.155136	-0.71841	0.481575	0.597737	Encodes a protein with &#946;-hexosaminidase activity (the enzyme is active with p-nitrophenyl-&#946;-N-acetylglucosaminide as substrate but displayed only a minor activity toward p-nitrophenyl-&#946;-N-acetylgalactosaminide). Chitotriose-PA was digested almost completely overnight by a 50% ammonium sulfate fraction of a supernatant yeast expressing AtHEX3. protein_coding BETA-HEXOSAMINIDASE 2 (H…	AT1G05590	22.6424	25.4459	-0.210286	-1.02544	0.318516	0.488127	Encodes a protein with &#946;-hexosaminidase activity (the enzyme is active with p-nitrophenyl-&#946;-N-acetylglucosaminide as substrate but displayed only a minor activity toward p-nitrophenyl-&#946;-N-acetylgalactosaminide). Chitotriose-PA was digested almost completely overnight by a 50% ammonium sulfate fraction of a supernatant yeast expressing AtHEX3. protein_coding BETA-HEXOSAMINIDASE 2 (H…	AT1G05590	18.532	16.5859	0.164399	0.758869	0.457592	0.631605	Encodes a protein with &#946;-hexosaminidase activity (the enzyme is active with p-nitrophenyl-&#946;-N-acetylglucosaminide as substrate but displayed only a minor activity toward p-nitrophenyl-&#946;-N-acetylgalactosaminide). Chitotriose-PA was digested almost completely overnight by a 50% ammonium sulfate fraction of a supernatant yeast expressing AtHEX3. protein_coding BETA-HEXOSAMINIDASE 2 (H…	AT1G05590	20.6471	25.4459	-0.30164	-1.4498	0.164033	0.258791	Encodes a protein with &#946;-hexosaminidase activity (the enzyme is active with p-nitrophenyl-&#946;-N-acetylglucosaminide as substrate but displayed only a minor activity toward p-nitrophenyl-&#946;-N-acetylgalactosaminide). Chitotriose-PA was digested almost completely overnight by a 50% ammonium sulfate fraction of a supernatant yeast expressing AtHEX3. protein_coding BETA-HEXOSAMINIDASE 2 (H…
AT1G05600	2.05499	4.97514	-1.24738	-3.89362	0.00103624	0.00474703	Tetratricopeptide repeat (TPR)-like superfamily protein;(source:Araport11) protein_coding EMBRYO DEFECTIVE 3101 (EMB3101) EMBRYO DEFECTIVE 3101 (EMB3101)	AT1G05600	6.01001	3.83011	0.696091	2.29561	0.0337133	0.101178	Tetratricopeptide repeat (TPR)-like superfamily protein;(source:Araport11) protein_coding EMBRYO DEFECTIVE 3101 (EMB3101) EMBRYO DEFECTIVE 3101 (EMB3101)	AT1G05600	2.36946	4.97514	-1.07618	-3.2253	0.00461721	0.0283105	Tetratricopeptide repeat (TPR)-like superfamily protein;(source:Araport11) protein_coding EMBRYO DEFECTIVE 3101 (EMB3101) EMBRYO DEFECTIVE 3101 (EMB3101)	AT1G05600	2.79747	3.83011	-0.442107	-1.22285	0.236898	0.34681	Tetratricopeptide repeat (TPR)-like superfamily protein;(source:Araport11) protein_coding EMBRYO DEFECTIVE 3101 (EMB3101) EMBRYO DEFECTIVE 3101 (EMB3101)
AT1G05620	1.92096	1.39945	0.0454767	0.0705775	0.944499	0.963318	Encodes a cytosolic inosine nucleoside hydrolase. It forms a heterocomplex with NSH1 with almost two orders of magnitude higher catalytic efficiency for xanthosine hydrolysis than observed for NSH1 alone. Transcript levels for this gene are elevated in older leaves suggesting that it may play a role in purine catabolism during senescence. protein_coding URIDINE-RIBOHYDROLASE 2 (URH2) NUCLEOSIDE H…	AT1G05620	3.00685	5.26474	-0.728575	-1.6972	0.106596	0.228063	Encodes a cytosolic inosine nucleoside hydrolase. It forms a heterocomplex with NSH1 with almost two orders of magnitude higher catalytic efficiency for xanthosine hydrolysis than observed for NSH1 alone. Transcript levels for this gene are elevated in older leaves suggesting that it may play a role in purine catabolism during senescence. protein_coding URIDINE-RIBOHYDROLASE 2 (URH2) NUCLEOSIDE H…	AT1G05620	1.83648	1.39945	0.301925	0.464511	0.647759	0.778596	Encodes a cytosolic inosine nucleoside hydrolase. It forms a heterocomplex with NSH1 with almost two orders of magnitude higher catalytic efficiency for xanthosine hydrolysis than observed for NSH1 alone. Transcript levels for this gene are elevated in older leaves suggesting that it may play a role in purine catabolism during senescence. protein_coding URIDINE-RIBOHYDROLASE 2 (URH2) NUCLEOSIDE H…	AT1G05620	4.39498	5.26474	-0.192687	-0.491184	0.629133	0.727983	Encodes a cytosolic inosine nucleoside hydrolase. It forms a heterocomplex with NSH1 with almost two orders of magnitude higher catalytic efficiency for xanthosine hydrolysis than observed for NSH1 alone. Transcript levels for this gene are elevated in older leaves suggesting that it may play a role in purine catabolism during senescence. protein_coding URIDINE-RIBOHYDROLASE 2 (URH2) NUCLEOSIDE H…
AT1G05630	11.2906	5.43073	1.07227	2.2234	0.0390054	0.0850109	Encodes an inositol polyphosphate 5-phosphatase with phosphatase activity toward only Ins(1,4,5)P3. Induced in response to ABA and wounding treatments. Expressed in young seedlings and flowers, while no transcripts were detectable in maturated roots, stems, and rosette leaves Modulates the development of cotyledon veins through its regulation of auxin homeostasis. Involved in blue light light?sti…	AT1G05630	32.3766	41.6102	-0.252384	-0.851222	0.405644	0.573383	Encodes an inositol polyphosphate 5-phosphatase with phosphatase activity toward only Ins(1,4,5)P3. Induced in response to ABA and wounding treatments. Expressed in young seedlings and flowers, while no transcripts were detectable in maturated roots, stems, and rosette leaves Modulates the development of cotyledon veins through its regulation of auxin homeostasis. Involved in blue light light?sti…	AT1G05630	10.0324	5.43073	0.831254	1.65995	0.113958	0.259317	Encodes an inositol polyphosphate 5-phosphatase with phosphatase activity toward only Ins(1,4,5)P3. Induced in response to ABA and wounding treatments. Expressed in young seedlings and flowers, while no transcripts were detectable in maturated roots, stems, and rosette leaves Modulates the development of cotyledon veins through its regulation of auxin homeostasis. Involved in blue light light?sti…	AT1G05630	54.1424	41.6102	0.50758	1.77529	0.0924786	0.163766	Encodes an inositol polyphosphate 5-phosphatase with phosphatase activity toward only Ins(1,4,5)P3. Induced in response to ABA and wounding treatments. Expressed in young seedlings and flowers, while no transcripts were detectable in maturated roots, stems, and rosette leaves Modulates the development of cotyledon veins through its regulation of auxin homeostasis. Involved in blue light light?sti…
AT1G05640	4.15371	2.7952	0.855485	1.76125	0.0948908	0.170987	Ankyrin repeat family protein;(source:Araport11) protein_coding	AT1G05640	4.20443	3.90998	0.0575467	0.131896	0.896505	0.938413	Ankyrin repeat family protein;(source:Araport11) protein_coding	AT1G05640	2.57633	2.7952	0.0768865	0.141235	0.889227	0.939326	Ankyrin repeat family protein;(source:Araport11) protein_coding	AT1G05640	11.3375	3.90998	1.5223	4.01439	0.000790105	0.00325734	Ankyrin repeat family protein;(source:Araport11) protein_coding
AT1G05670	4.03757	9.73992	-1.26326	-3.90893	0.00100121	0.00462836	Pentatricopeptide repeat (PPR-like) superfamily protein;(source:Araport11) protein_coding	AT1G05670	8.88711	8.25974	0.0761605	0.247578	0.807217	0.883751	Pentatricopeptide repeat (PPR-like) superfamily protein;(source:Araport11) protein_coding	AT1G05670	3.80303	9.73992	-1.28913	-3.71181	0.00155856	0.0129675	Pentatricopeptide repeat (PPR-like) superfamily protein;(source:Araport11) protein_coding	AT1G05670	7.19429	8.25974	-0.234437	-0.723838	0.478315	0.593831	Pentatricopeptide repeat (PPR-like) superfamily protein;(source:Araport11) protein_coding
AT1G05675	7.63409	1.71697	2.05366	3.8742	0.00108243	0.00490962	UDP-Glycosyltransferase superfamily protein;(source:Araport11) protein_coding	AT1G05675	6.12103	0.822259	2.73215	3.53241	0.00232981	0.0145073	UDP-Glycosyltransferase superfamily protein;(source:Araport11) protein_coding	AT1G05675	3.55433	1.71697	1.03777	1.81149	0.0865065	0.216088	UDP-Glycosyltransferase superfamily protein;(source:Araport11) protein_coding	AT1G05675	13.049	0.822259	4.02406	5.34409	4.1947e-05	0.00030275	UDP-Glycosyltransferase superfamily protein;(source:Araport11) protein_coding
AT1G05690	9.72983	9.34263	0.125957	0.401742	0.692526	0.777318	BTB and TAZ domain protein. Acts redunantly with BT1 and BT2 during female gametophyte development. Acts with BT2 during male gametophyte development. protein_coding BTB AND TAZ DOMAIN PROTEIN 3 (bt3) BTB AND TAZ DOMAIN PROTEIN 3 (bt3)	AT1G05690	4.8357	2.98617	0.736388	1.36786	0.187914	0.340012	BTB and TAZ domain protein. Acts redunantly with BT1 and BT2 during female gametophyte development. Acts with BT2 during male gametophyte development. protein_coding BTB AND TAZ DOMAIN PROTEIN 3 (bt3) BTB AND TAZ DOMAIN PROTEIN 3 (bt3)	AT1G05690	9.83183	9.34263	0.182087	0.562543	0.580571	0.730008	BTB and TAZ domain protein. Acts redunantly with BT1 and BT2 during female gametophyte development. Acts with BT2 during male gametophyte development. protein_coding BTB AND TAZ DOMAIN PROTEIN 3 (bt3) BTB AND TAZ DOMAIN PROTEIN 3 (bt3)	AT1G05690	2.54443	2.98617	-0.167285	-0.270896	0.789502	0.854645	BTB and TAZ domain protein. Acts redunantly with BT1 and BT2 during female gametophyte development. Acts with BT2 during male gametophyte development. protein_coding BTB AND TAZ DOMAIN PROTEIN 3 (bt3) BTB AND TAZ DOMAIN PROTEIN 3 (bt3)
AT1G05710	4.25964	0.855645	1.97451	1.99183	0.0615228	0.122432	basic helix-loop-helix (bHLH) DNA-binding superfamily protein;(source:Araport11) protein_coding	AT1G05710	1.91656	0.928064	1.14802	1.01112	0.325138	0.494659	basic helix-loop-helix (bHLH) DNA-binding superfamily protein;(source:Araport11) protein_coding	AT1G05710	2.73766	0.855645	1.72087	1.68074	0.109798	0.253008	basic helix-loop-helix (bHLH) DNA-binding superfamily protein;(source:Araport11) protein_coding	AT1G05710	2.61964	0.928064	1.715	1.60324	0.125996	0.209811	basic helix-loop-helix (bHLH) DNA-binding superfamily protein;(source:Araport11) protein_coding
AT1G05720	25.6261	13.1979	0.976242	5.13765	6.55339e-05	0.000513422	selenoprotein family protein;(source:Araport11) protein_coding	AT1G05720	7.659	6.62867	0.202618	0.71179	0.485568	0.64319	selenoprotein family protein;(source:Araport11) protein_coding	AT1G05720	14.7286	13.1979	0.164555	0.805124	0.431082	0.607421	selenoprotein family protein;(source:Araport11) protein_coding	AT1G05720	15.4293	6.62867	1.20711	4.65755	0.000187934	0.00100134	selenoprotein family protein;(source:Araport11) protein_coding
AT1G05730	0.523258	0.897573	0.580697	0.371178	0.714766	0.795516	FAM136A-like protein (DUF842);(source:Araport11) protein_coding	AT1G05730	0.402693	0.207314	0.637774	0.27442	0.786835	0.870672	FAM136A-like protein (DUF842);(source:Araport11) protein_coding	AT1G05730	0.302276	0.897573	-1.39081	-0.682782	0.503295	0.669107	FAM136A-like protein (DUF842);(source:Araport11) protein_coding	AT1G05730	0.850605	0.207314	3.11354	1.56484	0.134744	0.221106	FAM136A-like protein (DUF842);(source:Araport11) protein_coding
AT1G05750	3.21216	4.31165	-0.419687	-0.90942	0.374948	0.496801	Encodes a pentatricopeptide repeat protein required for editing of rpoA and clpP chloroplast transcripts. protein_coding PIGMENT DEFECTIVE 247 (PDE247) CHLOROPLAST BIOGENESIS 19 (CLB19);PIGMENT DEFECTIVE 247 (PDE247)	AT1G05750	2.93383	3.25106	-0.199519	-0.365707	0.718776	0.824481	Encodes a pentatricopeptide repeat protein required for editing of rpoA and clpP chloroplast transcripts. protein_coding PIGMENT DEFECTIVE 247 (PDE247) CHLOROPLAST BIOGENESIS 19 (CLB19);PIGMENT DEFECTIVE 247 (PDE247)	AT1G05750	2.10454	4.31165	-0.860615	-1.59599	0.12761	0.278671	Encodes a pentatricopeptide repeat protein required for editing of rpoA and clpP chloroplast transcripts. protein_coding PIGMENT DEFECTIVE 247 (PDE247) CHLOROPLAST BIOGENESIS 19 (CLB19);PIGMENT DEFECTIVE 247 (PDE247)	AT1G05750	3.46895	3.25106	0.0699617	0.132548	0.895997	0.929086	Encodes a pentatricopeptide repeat protein required for editing of rpoA and clpP chloroplast transcripts. protein_coding PIGMENT DEFECTIVE 247 (PDE247) CHLOROPLAST BIOGENESIS 19 (CLB19);PIGMENT DEFECTIVE 247 (PDE247)
AT1G05760	1.88346	2.1339	0.752157	0.955504	0.351773	0.472898	Specifically restrict the long-distance movement of tobacco etch potyvirus (TEV) without involving either hypersensitive cell death or systemic acquired resistance protein_coding RESTRICTED TEV MOVEMENT 1 (RTM1) RESTRICTED TEV MOVEMENT 1 (RTM1)	AT1G05760	0.618425	1.60928	-1.36154	-1.32431	0.2017	0.3565	Specifically restrict the long-distance movement of tobacco etch potyvirus (TEV) without involving either hypersensitive cell death or systemic acquired resistance protein_coding RESTRICTED TEV MOVEMENT 1 (RTM1) RESTRICTED TEV MOVEMENT 1 (RTM1)	AT1G05760	3.15627	2.1339	1.33442	1.74342	0.0980328	0.234497	Specifically restrict the long-distance movement of tobacco etch potyvirus (TEV) without involving either hypersensitive cell death or systemic acquired resistance protein_coding RESTRICTED TEV MOVEMENT 1 (RTM1) RESTRICTED TEV MOVEMENT 1 (RTM1)	AT1G05760	1.38638	1.60928	-0.377411	-0.436729	0.667416	0.760477	Specifically restrict the long-distance movement of tobacco etch potyvirus (TEV) without involving either hypersensitive cell death or systemic acquired resistance protein_coding RESTRICTED TEV MOVEMENT 1 (RTM1) RESTRICTED TEV MOVEMENT 1 (RTM1)
AT1G05770	1.11827	0.742263	1.94693	1.51785	0.146135	0.239025	Mannose-binding lectin superfamily protein;(source:Araport11) protein_coding	AT1G05770	0.47286	0.218226	0.868807	0.553311	0.586746	0.724829	Mannose-binding lectin superfamily protein;(source:Araport11) protein_coding	AT1G05770	0.284845	0.742263	-0.896887	-0.507712	0.617718	0.757957	Mannose-binding lectin superfamily protein;(source:Araport11) protein_coding	AT1G05770	0.187158	0.218226	-0.647569	-0.350142	0.730229	0.808273	Mannose-binding lectin superfamily protein;(source:Araport11) protein_coding
AT1G05780	2.97995	1.48076	1.36882	2.0829	0.0515462	0.106628	Vacuolar ATPase assembly integral membrane protein VMA21-like domain-containing protein;(source:Araport11) protein_coding	AT1G05780	1.61493	1.00335	0.897944	1.10739	0.282467	0.449662	Vacuolar ATPase assembly integral membrane protein VMA21-like domain-containing protein;(source:Araport11) protein_coding	AT1G05780	1.52396	1.48076	0.436584	0.575142	0.572198	0.723226	Vacuolar ATPase assembly integral membrane protein VMA21-like domain-containing protein;(source:Araport11) protein_coding	AT1G05780	1.51767	1.00335	0.829931	1.00579	0.32763	0.444513	Vacuolar ATPase assembly integral membrane protein VMA21-like domain-containing protein;(source:Araport11) protein_coding
AT1G05783	0.501313	0.514881	0.136182	0.129417	0.898439	0.931665	hypothetical protein;(source:Araport11) protein_coding	AT1G05783	0.674657	0.633737	-0.524515	-0.466271	0.646523	0.771238	hypothetical protein;(source:Araport11) protein_coding	AT1G05783	0.880031	0.514881	0.881995	0.868513	0.396358	0.575859	hypothetical protein;(source:Araport11) protein_coding	AT1G05783	2.86337	0.633737	2.11981	2.5555	0.019699	0.0464289	hypothetical protein;(source:Araport11) protein_coding
AT1G05785	0.878484	1.97648	-0.844731	-1.46545	0.159766	0.256234	Got1/Sft2-like vescicle transport protein family;(source:Araport11) protein_coding	AT1G05785	0.231427	1.16956	-2.36227	-2.49775	0.0222321	0.0749326	Got1/Sft2-like vescicle transport protein family;(source:Araport11) protein_coding	AT1G05785	1.16014	1.97648	-0.501877	-0.882913	0.388732	0.568822	Got1/Sft2-like vescicle transport protein family;(source:Araport11) protein_coding	AT1G05785	2.18303	1.16956	0.906854	1.54206	0.140169	0.228116	Got1/Sft2-like vescicle transport protein family;(source:Araport11) protein_coding
AT1G05790	21.0235	39.6239	-0.916218	-5.66422	2.1199e-05	0.000208189	lipase class 3 family protein;(source:Araport11) protein_coding	AT1G05790	16.669	23.0972	-0.44968	-2.36053	0.0295308	0.0920974	lipase class 3 family protein;(source:Araport11) protein_coding	AT1G05790	32.6695	39.6239	-0.280636	-1.7635	0.0945015	0.228818	lipase class 3 family protein;(source:Araport11) protein_coding	AT1G05790	23.6939	23.0972	0.0424093	0.232788	0.818509	0.875403	lipase class 3 family protein;(source:Araport11) protein_coding
AT1G05805	113.53	98.5247	0.17943	1.04779	0.308372	0.427871	basic helix-loop-helix (bHLH) DNA-binding superfamily protein;(source:Araport11) protein_coding ABA-RESPONSIVE KINASE SUBSTRATE 2 (AKS2) ABA-RESPONSIVE KINASE SUBSTRATE 2 (AKS2)	AT1G05805	105.872	66.687	0.669413	3.86722	0.00109953	0.00843141	basic helix-loop-helix (bHLH) DNA-binding superfamily protein;(source:Araport11) protein_coding ABA-RESPONSIVE KINASE SUBSTRATE 2 (AKS2) ABA-RESPONSIVE KINASE SUBSTRATE 2 (AKS2)	AT1G05805	149.017	98.5247	0.577925	3.36983	0.0033494	0.0226268	basic helix-loop-helix (bHLH) DNA-binding superfamily protein;(source:Araport11) protein_coding ABA-RESPONSIVE KINASE SUBSTRATE 2 (AKS2) ABA-RESPONSIVE KINASE SUBSTRATE 2 (AKS2)	AT1G05805	66.1674	66.687	-0.0121514	-0.0696666	0.945214	0.962636	basic helix-loop-helix (bHLH) DNA-binding superfamily protein;(source:Araport11) protein_coding ABA-RESPONSIVE KINASE SUBSTRATE 2 (AKS2) ABA-RESPONSIVE KINASE SUBSTRATE 2 (AKS2)
AT1G05810	32.4982	10.6163	1.60377	6.69327	2.57826e-06	3.89685e-05	Rab GTPase-like A5A protein;(source:Araport11) protein_coding RAB GTPASE HOMOLOG A5E (RABA5E) (ARA); (ARA-1);RAB GTPASE HOMOLOG A5E (RABA5E);ARABIDOPSIS THALIANA RAB GTPASE HOMOLOG A5E (ATRABA5E); (ATRAB11D)	AT1G05810	3.92636	5.47887	-0.51715	-1.22104	0.237565	0.398494	Rab GTPase-like A5A protein;(source:Araport11) protein_coding RAB GTPASE HOMOLOG A5E (RABA5E) (ARA); (ARA-1);RAB GTPASE HOMOLOG A5E (RABA5E);ARABIDOPSIS THALIANA RAB GTPASE HOMOLOG A5E (ATRABA5E); (ATRAB11D)	AT1G05810	12.9327	10.6163	0.309785	1.18031	0.252987	0.433536	Rab GTPase-like A5A protein;(source:Araport11) protein_coding RAB GTPASE HOMOLOG A5E (RABA5E) (ARA); (ARA-1);RAB GTPASE HOMOLOG A5E (RABA5E);ARABIDOPSIS THALIANA RAB GTPASE HOMOLOG A5E (ATRABA5E); (ATRAB11D)	AT1G05810	2.16892	5.47887	-1.23729	-2.41786	0.0262441	0.0589061	Rab GTPase-like A5A protein;(source:Araport11) protein_coding RAB GTPASE HOMOLOG A5E (RABA5E) (ARA); (ARA-1);RAB GTPASE HOMOLOG A5E (RABA5E);ARABIDOPSIS THALIANA RAB GTPASE HOMOLOG A5E (ATRABA5E); (ATRAB11D)
AT1G05820	2.07939	1.56823	0.916897	1.38396	0.183015	0.284981	SIGNAL PEPTIDE PEPTIDASE-LIKE 5;(source:Araport11) protein_coding SIGNAL PEPTIDE PEPTIDASE-LIKE 5 (SPPL5) ARABIDOPSIS THALIANA SIGNAL PEPTIDE PEPTIDASE-LIKE 5 (ATSPPL5);SIGNAL PEPTIDE PEPTIDASE-LIKE 5 (SPPL5)	AT1G05820	0.908807	1.38264	-0.592482	-0.732408	0.473194	0.633183	SIGNAL PEPTIDE PEPTIDASE-LIKE 5;(source:Araport11) protein_coding SIGNAL PEPTIDE PEPTIDASE-LIKE 5 (SPPL5) ARABIDOPSIS THALIANA SIGNAL PEPTIDE PEPTIDASE-LIKE 5 (ATSPPL5);SIGNAL PEPTIDE PEPTIDASE-LIKE 5 (SPPL5)	AT1G05820	1.72519	1.56823	0.523552	0.741041	0.468069	0.640887	SIGNAL PEPTIDE PEPTIDASE-LIKE 5;(source:Araport11) protein_coding SIGNAL PEPTIDE PEPTIDASE-LIKE 5 (SPPL5) ARABIDOPSIS THALIANA SIGNAL PEPTIDE PEPTIDASE-LIKE 5 (ATSPPL5);SIGNAL PEPTIDE PEPTIDASE-LIKE 5 (SPPL5)	AT1G05820	0.971674	1.38264	-0.416323	-0.52018	0.609173	0.711093	SIGNAL PEPTIDE PEPTIDASE-LIKE 5;(source:Araport11) protein_coding SIGNAL PEPTIDE PEPTIDASE-LIKE 5 (SPPL5) ARABIDOPSIS THALIANA SIGNAL PEPTIDE PEPTIDASE-LIKE 5 (ATSPPL5);SIGNAL PEPTIDE PEPTIDASE-LIKE 5 (SPPL5)
AT1G05830	34.4087	50.1554	-0.564635	-3.81092	0.00124769	0.00549598	Encodes a homolog of trithorax, a histone-lysine N-methyltransferase. Paralog of ATX1. Unlike ATX1 which is involved in trimethylating of histone H3-mysine 4, ATX2 is involved in dimethylating of histone H3-lysine 4. ATX1 and ATX2 influence the expression of largely nonoverlapping gene sets. The expression pattern of ATX2 is also different from that of ATX1. protein_coding TRITHORAX-LIKE PROTEIN …	AT1G05830	34.2591	39.1186	-0.192344	-1.21904	0.238307	0.399346	Encodes a homolog of trithorax, a histone-lysine N-methyltransferase. Paralog of ATX1. Unlike ATX1 which is involved in trimethylating of histone H3-mysine 4, ATX2 is involved in dimethylating of histone H3-lysine 4. ATX1 and ATX2 influence the expression of largely nonoverlapping gene sets. The expression pattern of ATX2 is also different from that of ATX1. protein_coding TRITHORAX-LIKE PROTEIN …	AT1G05830	41.2453	50.1554	-0.281991	-1.89593	0.0738686	0.194039	Encodes a homolog of trithorax, a histone-lysine N-methyltransferase. Paralog of ATX1. Unlike ATX1 which is involved in trimethylating of histone H3-mysine 4, ATX2 is involved in dimethylating of histone H3-lysine 4. ATX1 and ATX2 influence the expression of largely nonoverlapping gene sets. The expression pattern of ATX2 is also different from that of ATX1. protein_coding TRITHORAX-LIKE PROTEIN …	AT1G05830	33.768	39.1186	-0.207968	-1.31289	0.205443	0.3093	Encodes a homolog of trithorax, a histone-lysine N-methyltransferase. Paralog of ATX1. Unlike ATX1 which is involved in trimethylating of histone H3-mysine 4, ATX2 is involved in dimethylating of histone H3-lysine 4. ATX1 and ATX2 influence the expression of largely nonoverlapping gene sets. The expression pattern of ATX2 is also different from that of ATX1. protein_coding TRITHORAX-LIKE PROTEIN …
AT1G05835	0.166893	0.3472	-1.49292	-0.645698	0.526487	0.636412	PhD finger protein. protein_coding	AT1G05835	0.0587524	0.443972	-3.80645	-1.8798	0.0761483	0.180745	PhD finger protein. protein_coding	AT1G05835	0.285378	0.3472	-0.728026	-0.338768	0.73864	0.843064	PhD finger protein. protein_coding	AT1G05835	0.337582	0.443972	-1.52231	-0.91675	0.371194	0.489549	PhD finger protein. protein_coding
AT1G05840	26.9873	47.4019	-0.811633	-5.36506	4.0099e-05	0.000345974	Eukaryotic aspartyl protease family protein;(source:Araport11) protein_coding	AT1G05840	18.3748	13.6797	0.427738	2.12805	0.0471642	0.128342	Eukaryotic aspartyl protease family protein;(source:Araport11) protein_coding	AT1G05840	34.0398	47.4019	-0.476214	-3.13823	0.00559688	0.032584	Eukaryotic aspartyl protease family protein;(source:Araport11) protein_coding	AT1G05840	26.4754	13.6797	0.940036	4.8427	0.000124888	0.000721039	Eukaryotic aspartyl protease family protein;(source:Araport11) protein_coding
AT1G05850	605.877	445.253	0.451041	2.5178	0.0213196	0.0529234	Encodes an endo chitinase-like protein AtCTL1. Essential for tolerance to heat, salt and drought stresses. Also involved in root hair development, cell expansion and response to cytokinin. Allelic to erh2. 11 alleles described in Hauser (1995). Mutant is defective in acquired thermotolerance, appears semidwarf throughout its life cycle and has extra lateral branches. There are two EMS alleles. Ex…	AT1G05850	403.64	873.788	-1.1213	-6.32525	5.3906e-06	0.000176742	Encodes an endo chitinase-like protein AtCTL1. Essential for tolerance to heat, salt and drought stresses. Also involved in root hair development, cell expansion and response to cytokinin. Allelic to erh2. 11 alleles described in Hauser (1995). Mutant is defective in acquired thermotolerance, appears semidwarf throughout its life cycle and has extra lateral branches. There are two EMS alleles. Ex…	AT1G05850	501.847	445.253	0.15362	0.872385	0.394298	0.573971	Encodes an endo chitinase-like protein AtCTL1. Essential for tolerance to heat, salt and drought stresses. Also involved in root hair development, cell expansion and response to cytokinin. Allelic to erh2. 11 alleles described in Hauser (1995). Mutant is defective in acquired thermotolerance, appears semidwarf throughout its life cycle and has extra lateral branches. There are two EMS alleles. Ex…	AT1G05850	293.183	873.788	-1.57297	-8.97445	3.99249e-08	1.65944e-06	Encodes an endo chitinase-like protein AtCTL1. Essential for tolerance to heat, salt and drought stresses. Also involved in root hair development, cell expansion and response to cytokinin. Allelic to erh2. 11 alleles described in Hauser (1995). Mutant is defective in acquired thermotolerance, appears semidwarf throughout its life cycle and has extra lateral branches. There are two EMS alleles. Ex…
[truncated: 18,372 more rows]

## Sheet: Arabidopsis-High
Dataset S01. Expressed genes in the plants (Arabidopsis and lettuce) and the bacteria (Escherichia coli O157:H7 and Salmonella enterica Typhimurium 14028s) from three different experiments. Significantly differentially expressed genes were considered genes with a Benjanimi–Hochberg false discovery rate adjusted p-value (adj.P.Value) <0.001 for plant genes and <0.05 for bacterial genes and with a …																																Dataset S01. Significantly differentially expressed genes (DEG) in the plants (Arabidopsis and lettuce) and the bacteria (Escherichia coli O157:H7 and Salmonella enterica Typhimurium 14028s) from three different experiments. DEGs were considered genes with a Benjanimi–Hochberg false discovery rate adjusted p-value (adj.P.Value) <0.001 for plant genes and <0.05 for bacterial genes and with a Log2 …
[truncated: 18,730 more rows]
[truncated: 15 more columns]

[truncated: 1 more sheets: Lettuce-High]
